# Supplementary material for: A high-resolution map of small-scale inversions in the gibbon genome
Source: HighWire-hosted journal article supplement (doi:10.1101/gr.276960.122), 2022-09-30
Supplement: Supplemental_Tables.xlsx [file Supplemental_Tables.xlsx]

## Sheet: Supplemental_Table_S1
Supplemental Table S1. List of human-gibbon synteny blocks assessed combining cytogenetics with gibbon Strand-seq data (GRCh38/hg38 coordinates).
HSA1
chr1	0	30300000	HSA1_1_NLE24
chr1	30300000	52100000	HSA1_2_NLE12
chr1	52100000	53400000	HSA1_3_NLE9
chr1	53400000	54803759	HSA1_4_NLE5
chr1	54803759	67100000	HSA1_5_NLE5
chr1	67100000	181200000	HSA1_6_NLE12
chr1	181200000	203800000	HSA1_7_NLE9
chr1	203800000	213012942	HSA1_8_NLE5
chr1	213012942	248956422	HSA1_9_NLE5
HSA2
chr2	0	27677156	HSA2_1_NLE19
chr2	27677156	47400000	HSA2_2_NLE19
chr2	47400000	73389052	HSA2_3_NLE14
chr2	73389052	93139351	HSA2_4_NLE14
chr2	93139351	99286078	HSA2_5_NLE14
chr2	99286078	113500000	HSA2_6_NLE14
chr2	113500000	132300000	HSA2_7_NLE20
chr2	132300000	149600000	HSA2_8_NLE20
chr2	149600000	168400000	HSA2_9_NLE17
chr2	168400000	242193529	HSA2_10_NLE22b
HSA3
chr3	0	15200000	HSA3_1_NLE21
chr3	15200000	19800000	HSA3_2_NLE8
chr3	19800000	58700000	HSA3_3_NLE4
chr3	58700000	75872093	HSA3_4_NLE21
chr3	75872093	121537793	HSA3_5_NLE21
chr3	121537793	130000000	HSA3_6_NLE21
chr3	130000000	146400000	HSA3_7_NLE8
chr3	146400000	198295559	HSA3_8_NLE11
HSA4
chr4	0	50700000	HSA4_1_NLE20
chr4	50700000	68818559	HSA4_2_NLE9
chr4	68818559	109400000	HSA4_3_NLE9
chr4	109400000	116100000	HSA4_4_NLE18
chr4	116100000	139489839	HSA4_5_NLE7
chr4	139489839	190214555	HSA4_6_NLE7
HSA5
chr5	0	48200000	HSA5_1_NLE6
chr5	48200000	54800000	HSA5_2_NLE7
chr5	54800000	76400000	HSA5_3_NLE18
chr5	76400000	133157295	HSA5_4_NLE2
chr5	133157295	181538259	HSA5_5_NLE2
HSA6
chr6	0	27100000	HSA6_1_NLE8
chr6	27100000	36300000	HSA6_2_NLE1b
chr6	36300000	46200000	HSA6_3_NLE17
chr6	46200000	57600000	HSA6_4_NLE22b
chr6	57600000	78100000	HSA6_5_NLE3
chr6	78100000	85300000	HSA6_6_NLE18
chr6	85300000	170805979	HSA6_7_NLE3
HSA7
chr7	0	2500000	HSA7_1_NLE20
chr7	2500000	6900000	HSA7_2_NLE17
chr7	6900000	23100000	HSA7_3_NLE11
chr7	23100000	76800000	HSA7_4_NLE17
chr7	76800000	80400000	HSA7_5_NLE13
chr7	80400000	98000000	HSA7_6_NLE11
chr7	98000000	102500000	HSA7_7_NLE17
chr7	102500000	159345973	HSA7_8_NLE13
HSA8
chr8	0	20100000	HSA8_1_NLE4
chr8	20100000	47000000	HSA8_2_NLE8
chr8	47000000	61748223	HSA8_3_NLE16
chr8	61748223	72261501	HSA8_4_NLE16
chr8	72261501	98067904	HSA8_5_NLE16
chr8	98067904	145138636	HSA8_6_NLE16
HSA9
chr9	0	22300000	HSA9_1_NLE1b
chr9	22300000	27300000	HSA9_2_NLE8
chr9	27300000	31000000	HSA9_3_NLE1b
chr9	31000000	39600000	HSA9_4_NLE8
chr9	68300000	69100000	HSA9_5_NLE1b
chr9	69100000	111600000	HSA9_6_NLE1b
chr9	111600000	138394717	HSA9_7_NLE8
HSA10
chr10	0	23600000	HSA10_1_NLE9
chr10	23600000	50100000	HSA10_2_NLE18
chr10	50100000	56900000	HSA10_3_NLE3
chr10	56900000	87200000	HSA10_4_NLE18
chr10	87200000	133797422	HSA10_5_NLE3
HSA11
chr11	0	1200000	HSA11_1_NLE21
chr11	1200000	3400000	HSA11_2_NLE4
chr11	3400000	53200000	HSA11_3_NLE15
chr11	53200000	71600000	HSA11_4_NLE4
chr11	71600000	135086622	HSA11_5_NLE15
HSA12
chr12	0	30235430	HSA12_1_NLE23
chr12	30235430	38300000	HSA12_2_NLE23
chr12	38300000	47100000	HSA12_3_NLE11
chr12	47100000	52000000	HSA12_4_NLE8
chr12	52000000	64800000	HSA12_5_NLE11
chr12	64800000	100236434	HSA12_6_NLE10
chr12	100236434	133275309	HSA12_7_NLE10
HSA13
chr13	0	26875034	HSA13_1_NLE5
chr13	26875034	39600000	HSA13_2_NLE9
chr13	39600000	114364328	HSA13_3_NLE5
HSA14
chr14	0	31400000	HSA14_1_NLE22b
chr14	31400000	49562967	HSA14_2_NLE1b
chr14	49562967	73600000	HSA14_3_NLE1b
chr14	73600000	107043718	HSA14_4_NLE22b
HSA15
chr15	0	57556641	HSA15_1_NLE6
chr15	57556641	101991189	HSA15_2_NLE6
HSA16
chr16	0	19400000	HSA16_1_NLE18
chr16	19400000	74868982	HSA16_2_NLE2
chr16	74868982	90338345	HSA16_3_NLE2
HSA17
chr17	0	16700000	HSA17_1_NLE19
chr17	16700000	22800000	HSA17_2_NLE14
chr17	22800000	32100000	HSA17_3_NLE19
chr17	32100000	35200000	HSA17_4_NLE14
chr17	35200000	50500000	HSA17_5_NLE19
chr17	50500000	62200000	HSA17_6_NLE14
chr17	62200000	63847544	HSA17_7_NLE19
chr17	63847544	66000000	HSA17_8_NLE19
chr17	66000000	74316315	HSA17_9_NLE14
chr17	74316315	83257441	HSA17_10_NLE14
HSA18
chr18	0	18179647	HSA18_1_NLE4
chr18	18179647	80373285	HSA18_2_NLE4
HSA19
chr19	0	5900000	HSA19_1_NLE17
chr19	5900000	36700000	HSA19_2_NLE10
chr19	36700000	38800000	HSA19_3_NLE11
chr19	38800000	46400000	HSA19_4_NLE17
chr19	46400000	53222024	HSA19_5_NLE10
chr19	53222024	58617616	HSA19_6_NLE10
HSA20
chr20	0	5500000	HSA20_1_NLE13
chr20	5500000	16700000	HSA20_2_NLE11
chr20	16700000	27551342	HSA20_3_NLE13
chr20	27551342	64444167	HSA20_4_NLE13
HSA21
chr21	0	46709983	HSA21_1_NLE25
HSA22
chr22	0	33008568	HSA22_1_NLE7
chr22	33008568	50818468	HSA22_2_NLE7

## Sheet: Supplemental_Table_S2
Supplemental Table S2. List of 444 regions showing a switch in reads directionality by Strand-seq between human and Nomascus siki genomes.
GRCh38/hg38 mapping
chr1	10478719	10560340
chr1	16848303	17126844
chr1	16953334	16965736
chr1	22237252	22361843
chr1	30993434	30993435
chr1	46900522	47134225
chr1	47706076	47740524
chr1	53399049	53411759
chr1	54249401	54291622
chr1	55917524	55946766
chr1	65743588	65759426
chr1	82489309	82518549
chr1	89000249	89054493
chr1	103411579	103424218
chr1	103972015	104028278
chr1	157199711	157214444
chr1	194219869	194399462
chr1	195086637	195131823
chr1	231284661	231302018
chr1	236237563	236249017
chr1	236279237	236290104
chr1	236279237	236290104
chr1	238397842	238424086
chr1	247973732	248338595
chr2	574068	588868
chr2	2778762	2921047
chr2	27704083	27780795
chr2	36877941	36939019
chr2	61423731	61446579
chr2	61489869	61503668
chr2	61893494	61906477
chr2	61993143	61994137
chr2	73740766	73826615
chr2	82527225	82570403
chr2	88689662	88728042
chr2	88800958	89331189
chr2	88800958	88829319
chr2	98978383	98978384
chr2	103993103	104066892
chr2	108202615	108244744
chr2	108714992	108900042
chr2	108715180	108901302
chr2	108968875	108988618
chr2	109730346	110102727
chr2	109733293	111868139
chr2	114714499	114727370
chr2	118982756	118995027
chr2	123093392	123172505
chr2	123474568	123485402
chr2	129831953	130719195
chr2	129831953	130141473
chr2	129841431	129854297
chr2	158724309	158740024
chr2	180767812	180785518
chr2	180798673	180890387
chr2	192580664	192594648
chr2	194121406	194135207
chr2	213118113	230791613
chr3	2020874	2063478
chr3	17775308	17808784
chr3	48094157	48110169
chr3	56268296	56268297
chr3	75281306	76109341
chr3	77016403	77061254
chr3	78163751	78181716
chr3	84389613	84389614
chr3	109702396	109714912
chr3	116911739	116930305
chr3	128830878	128841929
chr3	130444202	130454364
chr3	162701476	162876853
chr3	193423821	193670024
chr3	195605633	196084809
chr3	195614469	197666938
chr3	197198050	197667546
chr4	370068	445765
chr4	3881341	9800582
chr4	7734049	7758966
chr4	14913577	14945117
chr4	35524138	35581488
chr4	37782940	37797385
chr4	45186252	45201207
chr4	45950021	45993584
chr4	54130213	54131280
chr4	61104822	61136648
chr4	62408809	62425632
chr4	62984705	63062386
chr4	64036925	64076729
chr4	64036925	64076729
chr4	68373354	68438787
chr4	68421299	68438669
chr4	68991260	69057562
chr4	69435643	69622089
chr4	76203544	76230575
chr4	87924684	87935942
chr4	101564416	101575292
chr4	102235918	102247111
chr4	106837381	106874194
chr4	116141973	116373214
chr4	120944961	120958870
chr4	130396640	130417908
chr4	131565195	131578842
chr4	132118123	132147236
chr4	134712814	134747193
chr4	170636205	170646212
chr4	175078808	175156538
chr4	175196256	175277809
chr4	184155152	184174007
chr4	189110771	189168040
chr4	189848088	190122712
chr5	825131	870440
chr5	825131	870440
chr5	8073375	8160015
chr5	17384498	17727413
chr5	17789559	17859577
chr5	17967610	18248848
chr5	19293044	19310996
chr5	27212104	27230061
chr5	27410688	27420710
chr5	42918900	43043470
chr5	42918900	43043470
chr5	92247381	92294644
chr5	99207971	99234307
chr5	99582562	100401283
chr5	101180849	101198532
chr5	106563977	106575748
chr5	106563985	106565467
chr5	117819911	117832693
chr5	126149957	126174567
chr5	131886782	131898358
chr5	145149712	145166898
chr5	169951588	169971706
chr5	174244680	174245340
chr5	175971612	176302146
chr5	176193141	181473060
chr5	177691484	181477813
chr6	9267294	9576785
chr6	15903539	15935910
chr6	28720157	28818006
chr6	36151126	36364683
chr6	44748072	44760777
chr6	46886736	46907796
chr6	48668838	48700309
chr6	49066567	49100266
chr6	61163809	61220196
chr6	61542981	61557771
chr6	71264020	71274462
chr6	77862047	77877360
chr6	85946750	85962609
chr6	86628690	86714399
chr6	88405433	88421134
chr6	99916000	99978196
chr6	100160744	100214857
chr6	103223396	103238596
chr6	115101997	115149837
chr6	121619359	121676706
chr6	122217139	122238768
chr6	150800374	150828286
chr6	150851078	150906861
chr6	162557329	162639324
chr6	167217868	167395695
chr7	2531265	2679807
chr7	2615362	2679807
chr7	3254423	3288693
chr7	3482325	3500201
chr7	3955412	3973091
chr7	5799052	7002696
chr7	35969270	35996882
chr7	37963689	37963894
chr7	39762107	39883628
chr7	51423631	51450339
chr7	53187270	53863115
chr7	55661799	56229080
chr7	67293984	73324059
chr7	72511370	73531824
chr7	74924978	75218457
chr7	75556813	75596034
chr7	86252062	86465979
chr7	92468081	92484556
chr7	140469738	140485033
chr7	140469738	140485033
chr7	143521617	143874554
chr7	157669290	157773013
chr8	2148538	2321681
chr8	2230411	2486898
chr8	4416001	4554563
chr8	16285842	16304353
chr8	26270449	26300610
chr8	53367500	53379867
chr8	54602204	54603367
chr8	55886544	55918618
chr8	61474608	61485623
chr8	65506845	65523735
chr8	84319169	84361614
chr8	84972789	85013739
chr8	85578439	85645379
chr8	111940567	111962492
chr8	142918484	142935539
chr9	9674031	9688871
chr9	9720604	9822696
chr9	26955686	27076837
chr9	30948464	32489213
chr9	32955856	32966003
chr9	34651006	34750388
chr9	34808004	34827328
chr9	34843828	34869155
chr9	34869056	34885281
chr9	38271845	38297184
chr9	38400366	38459330
chr9	78718330	78743564
chr9	86370594	86383692
chr9	92273384	92273658
chr9	92833426	92881851
chr9	95604621	95637889
chr9	95613655	95633317
chr9	104065310	104076377
chr9	115975910	116037815
chr9	123976046	123992838
chr9	135871241	135888306
chr10	5047901	5062758
chr10	6444559	6456589
chr10	6824567	6837856
chr10	6926342	7155721
chr10	12046718	15026892
chr10	12411784	12447633
chr10	16845866	16845867
chr10	18553166	18563839
chr10	29448354	29465406
chr10	29478726	29591391
chr10	36569780	36670401
chr10	36702718	36726944
chr10	36900749	37454485
chr10	46086954	46991804
chr10	46561302	50201630
chr10	49843779	50784092
chr10	51147886	51150777
chr10	54789978	54789991
chr10	59478042	59499043
chr10	66427602	66448479
chr10	67559060	67583808
chr10	68389095	68389694
chr10	79500523	80258284
chr10	79575282	79582597
chr11	917003	941134
chr11	1135191	1210222
chr11	1135191	1210222
chr11	1873647	1915327
chr11	18245313	18249636
chr11	22178033	22231797
chr11	23147481	23221907
chr11	32167489	32350030
chr11	37952270	37978313
chr11	45663431	45673823
chr11	45730926	45787646
chr11	45787645	45921514
chr11	48812218	49095665
chr11	55495388	55553983
chr11	56703936	56734772
chr11	56885879	56949107
chr11	73725598	73830680
chr11	88220523	88246556
chr11	90118104	90153261
chr11	101231129	101231825
chr11	105172654	105192202
chr11	112677400	112716010
chr11	132615521	132638306
chr11	134102286	134115290
chr11	135020303	135059359
chr12	7892176	7937238
chr12	17773910	17862449
chr12	20036029	20078049
chr12	20191287	20264886
chr12	20762293	20775312
chr12	28641589	28674318
chr12	30854652	31013203
chr12	38481685	38481685
chr12	53878006	53901688
chr12	55138839	55255419
chr12	56492934	56504176
chr12	86843988	86856865
chr12	93902236	94098755
chr12	100634857	100648223
chr12	105299928	105316352
chr12	111698787	111840182
chr12	126141136	126317864
chr13	24536847	25032034
chr13	26875034	26900097
chr13	34277292	34319869
chr13	36714283	36730544
chr13	45376512	45456364
chr13	52162531	52643802
chr13	55408539	55425929
chr13	61886038	61936277
chr13	63716757	63769529
chr13	82449712	82795330
chr13	95605303	95605335
chr13	95851841	97982957
chr13	96210458	96291960
chr13	97458332	97530573
chr13	100057182	100059343
chr13	102067915	102305401
chr13	102390094	102653606
chr14	18231760	20981983
chr14	19609932	20282762
chr14	20843541	20881709
chr14	35912488	35923714
chr14	35322639	35374216
chr14	35719627	35842668
chr14	35912488	35912652
chr14	42038253	42051776
chr14	43966238	44031019
chr14	48113027	48113240
chr14	49456074	49504097
chr14	55987758	56000804
chr14	61005453	61015784
chr14	70494656	70504764
chr14	91255050	91329998
chr14	106773927	106813569
chr15	19822634	23465961
chr15	23039619	32607570
chr15	40122398	40155440
chr15	59377896	59426796
chr15	76089127	76103110
chr15	79492679	79519212
chr15	82292020	84593846
chr15	84038523	85,286,294
chr15	99740979	101939501
chr15	99743650	99990714
chr16	2729065	2748809
chr16	2781373	2873878
chr16	15976517	16415526
chr16	16568591	18782797
chr16	26038153	26050632
chr16	28055732	28055916
chr16	28590202	29638840
chr16	29035196	30339222
chr16	31629783	31949791
chr16	31629783	31667839
chr16	31807181	31949791
chr16	46382606	48328855
chr16	46382606	46744157
chr16	46660302	46744510
chr16	48147910	48328855
chr16	53345721	53413705
chr16	69367865	69368120
chr16	69943175	74330338
chr16	75201971	75221812
chr17	2346685	2375600
chr17	3050622	3253845
chr17	3595272	3595273
chr17	4869464	4895475
chr17	4994288	5044422
chr17	14214864	14254372
chr17	15163177	16906520
chr17	15252364	15345250
chr17	16656311	18847673
chr17	18374019	18937686
chr17	19020671	19292789
chr17	19473416	19768408
chr17	19996634	20044395
chr17	27438032	27466374
chr17	29282304	29301152
chr17	30549975	31051215
chr17	30550405	32131828
chr17	30550405	31051215
chr17	31936222	32131828
chr17	35144542	35171438
chr17	35148887	35195995
chr17	35173393	35195995
chr17	35190621	36458015
chr17	36149904	38315332
chr17	36149904	36458015
chr17	37751154	38315332
chr17	41574566	41683458
chr17	46155430	46707244
chr17	46155430	46707244
chr17	46157780	46707244
chr17	46218490	47095105
chr17	47444116	47671655
chr17	48578805	48621674
chr17	50419718	50448223
chr17	50532827	50562152
chr17	58289013	58326518
chr17	59547732	60127093
chr17	59921939	60127348
chr17	65626240	65710840
chr17	67212776	67243840
chr17	72584641	72584742
chr17	74135906	74236192
chr17	74250623	74375642
chr17	74250623	74262281
chr17	74250623	74262281
chr17	74338469	74375642
chr17	74348730	74375642
chr17	74892065	77124591
chr17	81203930	81231241
chr17	81306326	81323432
chr17	82319296	83247176
chr18	6297384	6311155
chr18	10592936	12231085
chr18	24154930	24192834
chr18	30455983	30471511
chr18	31803396	31813767
chr18	49550959	49575323
chr18	69087446	69204440
chr18	74878665	74888720
chr18	74922182	74961941
chr18	76482677	76600936
chr19	242440	292223
chr19	4763442	4773547
chr19	36229998	36243242
chr19	36255811	36268095
chr19	36318992	36363519
chr19	36748417	36767349
chr19	36776817	36802060
chr19	37005880	37030244
chr19	37007149	37030419
chr19	37043218	37054588
chr19	37106080	37124264
chr19	37112176	37123038
chr19	39554304	39709373
chr19	49958306	49972365
chr20	2956546	2956574
chr20	11413881	11437270
chr20	58156673	58307167
chr21	14195840	14290595
chr21	34648084	34667129
chr21	40025040	40039812
chr22	18158899	20699028
chr22	20378071	20420442
chr22	20667473	20699028
chr22	21010364	21442550
chr22	21011744	23676808
chr22	22074622	22111244
chr22	22172734	22187893
chr22	23303313	23676808
chr22	23518274	23599682
chr22	24236843	24683426
chr22	24236843	24301022
chr22	24598077	24683426
chr22	29399332	32197364
chr22	32321056	33099669
chr22	43197294	43241544
chr22	45971118	46038674

## Sheet: Supplemental_Table_S3
Supplemental Table S3. False inversion calls due to a missassembly or minor allele annotation in the human GRCh38/hg38 reference assembly.
BP1 Mapping	BP2 Mapping	Notes
chr10:45671028-46010443	chr10:46086954-46514318	Minor allele or potential misorient (Sanders et al., 2016, Catacchio et al., 2018), so Strand-seq appears to be inverted but is actually direct
chr1:146046099-147079564	chr1:147912552-149795840	Minor allele or potential misorient (Sanders et al., 2016, Catacchio et, 2018), so Strand-seq appears to be inverted but is actually direct
chr11:1873647-1894281	chr11:1914023-1915327	Misorientation of the human reference (Sanders et al., 2016, Vicente-Salvador et al. 2017 and Chaisson et al., 2019). Artifact due to a misassembly in the human reference.
chr12:17773910-17774517	chr12:17858006-17862449	Misorientation of the human reference (Sanders et al., 2016, Vicente-Salvador et al. 2017 and Chaisson et al., 2019). Artifact due to a misassembly in the human reference.
chr12:86843988-86849080	chr12:86856321-86856865	Misorientation of the human reference (Sanders et al., 2016, Vicente-Salvador et al. 2017 and Chaisson et al., 2019). Artifact due to a misassembly in the human reference.
chr21:40025040-40029190	chr21:40035740-40039812	Misorientation of the human reference (Vicente-Salvador et al. 2017 and Audano et al. 2019). Artifact due to a misassembly in the human reference.

## Sheet: Supplemental_Table_S4
Supplemental Table S4. Inversion calls missed by Strand-seq due to the annotation of the minor allele in the human GRCh38/hg38 reference assembly.
Inversion	BP1 Mapping	BP2 Mapping	Notes
chr10_inv11	chr10:46561417-46870207	chr10:47457081-47500010	The minor allele is annotated on the human reference, so Strand-seq appears to be direct but is actually inverted (Sanders et al., 2016)
chr16_inv4	chr16:21342884-21559095	chr16:21728768-21936253	The minor allele is annotated on the human reference, so Strand-seq appears to be direct but is actually inverted (Sanders et al., 2016)
chr16_inv5	chr16:21728768-21936253	chr16:22417156-22611067	The minor allele is annotated on the human reference, so Strand-seq appears to be direct but is actually inverted (Sanders et al., 2016)

## Sheet: Supplemental_Table_S5
Supplemental Table S5. Summary of all inversions detected in the present study.
Inversion	BP1	SDs_BP1	HSA_genes*_BP1	BP2	SDs_BP2	HSA_genes*_BP2	HOM/HET	Nested inv	Inversion References	Evolution (in the lineage of)	Evolution Known/Updated/New	Evolution References
chr1_inv1	chr1:16848303-16965736	yes	yes	chr1:17126770-17126844	no	no	hom	no	n.a.	NSI	new	n.a.
chr1_inv2	chr1:46900522-46920616	yes	no	chr1:47067286-47134225	yes	yes	hom	no	Maggiolini et al., 2020, Catacchio et al., 2018	GA anc	new	n.a.
chr1_inv3	chr1:53399049-53399514	no	no	chr1:53411425-53411759	no	no	het	no	n.a.	NSI	new	n.a.
chr1_inv4	chr1:55917524-55918256	no	yes	chr1:55946034-55946766	no	yes	hom	no	n.a.	NSI	new	n.a.
chr1_inv5	chr1:65743588-65744540	no	no	chr1:65758126-65759426	no	no	hom	no	Porubsky et al., 2020	indipendent inv in NSI and PPY	new	n.a.
chr1_inv6	chr1:82489309-82490027	no	no	chr1:82517552-82518549	no	no	hom	no	n.a.	NSI	new	n.a.
chr1_inv7	chr1:89000249-89005309	no	no	chr1:89046474-89054493	yes	yes	hom	no	n.a.	NSI	new	n.a.
chr1_inv8	chr1:103411579-103413179	no	no	chr1:103417122-103424218	no	yes	hom	no	n.a.	NSI	new	n.a.
chr1_inv9	chr1:103972015-104016504	no	no	chr1:104027658-104028278	no	no	hom	no	n.a.	NSI	new	n.a.
chr1_inv10	chr1:194219869-194225346	no	no	chr1:194395562-194399462	no	no	hom	no	Maggiolini et al., 2020, Catacchio et al., 2018, Porubsky et al., 2020	AGA anc	old	Maggiolini et al., 2020, Catacchio et al., 2018
chr1_inv11	chr1:195086637-195091567	no	no	chr1:195118107-195131823	no	no	hom	no	n.a.	NSI	new	n.a.
chr1_inv12	chr1:231284661-231289292	yes	no	chr1:231300449-231302018	no	no	het	no	n.a.	n.d.	n.d.	n.a.
chr1_inv13	chr1:236279237-236279387	no	yes	chr1:236289688-236290104	no	no	het	no	n.a.	NSI	new	n.a.
chr1_inv14	chr1:238397842-238398785	no	no	chr1:238420485-238424086	no	no	hom	no	n.a.	NSI	new	n.a.
chr1_inv15	chr1:247973732-248189641	yes	yes	chr1:248268197-248338595	yes	yes	hom	no	Catacchio et al., 2018, Maggiolini et al., 2020	GA anc	new	n.a.
chr2_inv1	chr2:574068-574572	no	no	chr2:587182-588868	no	no	hom	no	n.a.	NSI	new	n.a.
chr2_inv2	chr2:2778762-2778849	no	no	chr2:2920667-2921047	no	yes	hom	no	n.a.	NSI	new	n.a.
chr2_inv3	chr2:27704083-27704600	no	no	chr2:27779651-27780795	no	yes	hom	no	n.a.	NSI	new	n.a.
chr2_inv4	chr2:61893494-61899430	no	yes	chr2:61906250-61906477	no	yes	het	no	n.a.	NSI	new	n.a.
chr2_inv5	chr2:82527225-82530938	no	no	chr2:82562155-82570403	no	no	hom	no	n.a.	NSI	new	n.a.
chr2_inv6	chr2:88800958-88829319	yes	yes	chr2:88932646-89331189	yes	no	het	no	n.a.	n.d.	n.d.	n.a.
chr2_inv7	chr2:108202615-108209228	no	yes	chr2:108212576-108244744	no	yes	het	no	Maggiolini et al., 2020	n.d.	n.d.	n.a.
chr2_inv8	chr2:108715180-108771506	yes	yes	chr2:108901301-108901302	no	yes	het	no	n.a.	NSI	new	n.a.
chr2_inv9	chr2:109733293-110105649	yes	yes	chr2:111700579-111868139	yes	yes	hom	no	n.a.	NSI	new	n.a.
chr2_inv10	chr2:129831953-130141473	yes	yes	chr2:130401008-130719195	yes	yes	hom	no	n.a.	n.d.	n.d.	n.a.
chr2_inv11	chr2:158724309-158724784	no	yes	chr2:158739893-158740024	no	no	hom	no	Maggiolini et al., 2020, Porubsky et al., 2020	GA anc	new	n.a.
chr2_inv12	chr2:180767812-180767873	no	yes	chr2:180784244-180785518	no	yes	hom	no	Maggiolini et al., 2020, Porubsky et al., 2020	HSA	new	n.a.
chr2_inv13	chr2:180798673-180800465	no	yes	chr2:180866838-180890387	no	yes	hom	no	n.a.	NSI	new	n.a.
chr2_inv14	chr2:192580664-192582022	no	no	chr2:192592692-192594648	no	no	hom	no	n.a.	NSI	new	n.a.
chr2_inv15	chr2:194121406-194130703	no	no	chr2:194135075-194135207	no	no	het	no	n.a.	n.d.	n.d.	n.a.
chr2_inv16	chr2:213118113-213118814	no	yes	chr2:230791279-230791613	no	yes	het	no	n.a.	NSI	new	n.a.
chr3_inv1	chr3:2020874-2021885	no	no	chr3:2062984-2063478	no	no	hom	no	n.a.	NSI	new	n.a.
chr3_inv2	chr3:17775308-17788497	no	no	chr3:17807441-17808784	no	no	hom	no	n.a.	NSI	new	n.a.
chr3_inv3	chr3:48094157-48098490	no	no	chr3:48109272-48110169	no	no	hom	no	n.a.	NSI	new	n.a.
chr3_inv4	chr3:109702396-109702856	no	no	chr3:109714066-109714912	no	no	hom	no	Maggiolini et al., 2020, Porubsky et al., 2020	HSA-Pan anc	updated	Maggiolini et al., 2020
chr3_inv5	chr3:116911739-116912158	no	no	chr3:116929525-116930305	no	yes	hom	no	n.a.	NSI	new	n.a.
chr3_inv6	chr3:128830878-128831843	no	no	chr3:128841928-128841929	no	no	het	no	n.a.	n.d.	n.d.	n.a.
chr3_inv7	chr3:130444202-130444203	no	yes	chr3:130453306-130454364	no	yes	het	no	n.a.	n.d.	n.d.	n.a.
chr3_inv8	chr3:162701476-162702220	no	no	chr3:162874865-162876853	no	no	hom	no	n.a.	NSI	new	n.a.
chr3_inv9	chr3:195614469-195690071	yes	yes	chr3:197610937-197666938	yes	yes	het	no	Maggiolini et al., 2020, Porubsky et al., 2020	indipendent inv in AGA anc and NSI (polymorphic), or apes anc and ILS in PPY and NSI (polymorphic)	updated	Maggiolini et al., 2020
chr4_inv1	chr4:370068-372929	no	yes	chr4:444352-445765	no	yes	hom	no	n.a.	NSI	new	n.a.
chr4_inv2	chr4:3881341-4240715	yes	yes	chr4:8940702-9800582	yes	yes	hom	no	Maggiolini et al., 2020, Catacchio et al., 2018, Porubsky et al., 2020	HSA-Pan anc	updated	Maggiolini et al., 2020, Catacchio et al., 2018
chr4_inv3	chr4:35524138-35538429	no	no	chr4:35572632-35581488	no	no	hom	no	n.a.	NSI	new	n.a.
chr4_inv4	chr4:37782940-37785689	no	no	chr4:37797089-37797385	no	no	hom	no	n.a.	NSI	new	n.a.
chr4_inv5	chr4:45950021-45955002	no	no	chr4:45991597-45993584	no	no	hom	no	n.a.	NSI	new	n.a.
chr4_inv6	chr4:61104822-61108445	no	no	chr4:61133819-61136648	no	no	hom	no	Maggiolini et al., 2020	GA anc	new	n.a.
chr4_inv7	chr4:62408809-62409958	no	no	chr4:62420061-62425632	no	no	hom	no	n.a.	NSI	new	n.a.
chr4_inv8	chr4:62984705-62994203	no	no	chr4:63054051-63062386	no	no	hom	no	n.a.	NSI	new	n.a.
chr4_inv9	chr4:64036925-64036926	no	no	chr4:64076186-64076729	no	no	het	no	n.a.	NSI	new	n.a.
chr4_inv10	chr4:68373354-68395966	no	no	chr4:68406448-68438787	yes	no	hom	no	n.a.	NSI	new	n.a.
chr4_inv11	chr4:68991260-69006493	yes	no	chr4:69035190-69057562	yes	yes	hom	no	n.a.	NSI	new	n.a.
chr4_inv12	chr4:87924684-87926191	no	no	chr4:87935658-87935942	no	no	hom	no	Chaisson et al., 2019, ginerdel, Maggiolini et al., 2020, Porubsky et al., 2020	HSA (polymorphic)	old	Maggiolini et al., 2020
chr4_inv13	chr4:101564416-101567684	no	no	chr4:101574152-101575292	no	no	hom	no	n.a.	NSI	new	n.a.
chr4_inv14	chr4:102235918-102236047	no	no	chr4:102245863-102247111	no	no	het	no	n.a.	n.d.	n.d.	n.a.
chr4_inv15	chr4:106837381-106846642	no	no	chr4:106870331-106874194	no	no	hom	no	n.a.	NSI	new	n.a.
chr4_inv16	chr4:120944961-120947906	no	no	chr4:120957413-120958870	no	no	hom	no	n.a.	NSI	new	n.a.
chr4_inv17	chr4:130396640-130399632	no	no	chr4:130412015-130417908	no	no	hom	no	n.a.	NSI	new	n.a.
chr4_inv18	chr4:131565195-131571676	no	no	chr4:131576923-131578842	no	no	hom	no	Maggiolini et al., 2020, Porubsky et al., 2020	AGA anc	new	n.a.
chr4_inv19	chr4:132118123-132120520	no	no	chr4:132146738-132147236	no	no	hom	no	Maggiolini et al., 2020, Porubsky et al., 2020	HSA	old	Maggiolini et al., 2020
chr4_inv20	chr4:134712814-134714096	no	no	chr4:134746869-134747193	no	no	hom	no	n.a.	NSI	new	n.a.
chr4_inv21	chr4:170636205-170639479	no	no	chr4:170644999-170646212	no	no	het	no	n.a.	n.d.	n.d.	n.a.
chr5_inv1	chr5:825131-850886	yes	yes	chr5:870316-870440	no	yes	het	no	n.a.	n.d.	n.d.	n.a.
chr5_inv2	chr5:8073375-8087415	no	no	chr5:8157846-8160015	no	no	hom	no	Maggiolini et al., 2020, Porubsky et al., 2020	HSA-Pan anc	updated	Maggiolini et al., 2020
chr5_inv3	chr5:17967610-17974174	no	no	chr5:18243762-18248848	no	no	hom	no	n.a.	NSI	new	n.a.
chr5_inv4	chr5:19293044-19293868	no	no	chr5:19307873-19310996	no	no	hom	no	n.a.	NSI	new	n.a.
chr5_inv5	chr5:27212104-27213212	no	no	chr5:27229717-27230061	no	no	hom	no	n.a.	NSI	new	n.a.
chr5_inv6	chr5:27410688-27412052	no	no	chr5:27416392-27420710	no	no	hom	no	n.a.	NSI	new	n.a.
chr5_inv7	chr5:42918900-42919357	no	no	chr5:43024769-43043470	no	yes	het	no	n.a.	NSI	new	n.a.
chr5_inv8	chr5:92247381-92248103	no	no	chr5:92293947-92294644	no	no	hom	no	n.a.	NSI	new	n.a.
chr5_inv9	chr5:99207971-99212713	no	no	chr5:99234088-99234307	no	no	het	no	n.a.	NSI	new	n.a.
chr5_inv10	chr5:99582562-99586076	yes	no	chr5:100330777-100401283	yes	yes	hom	no	Maggiolini et al., 2020, Catacchio et al., 2018, Porubsky et al., 2020	n.d.	n.d.	n.a.
chr5_inv11	chr5:101180849-101186207	no	no	chr5:101195522-101198532	no	no	hom	no	n.a.	NSI	new	n.a.
chr5_inv12	chr5:106563977-106565461	no	no	chr5:106574717-106575748	no	no	hom	no	Porubsky et al., 2020	indipendent inv in HSA and MMU	new	n.a.
chr5_inv13	chr5:117819911-117821419	no	yes	chr5:117830492-117832693	no	yes	hom	no	n.a.	NSI	new	n.a.
chr5_inv14	chr5:126149957-126151357	no	no	chr5:126155184-126174567	no	no	het	no	n.a.	n.d.	n.d.	n.a.
chr5_inv15	chr5:131886782-131886979	no	yes	chr5:131898357-131898358	no	yes	het	no	n.a.	n.d.	n.d.	n.a.
chr5_inv16	chr5:145149712-145153680	no	no	chr5:145166509-145166898	no	no	hom	no	Maggiolini et al., 2020, Porubsky et al., 2020	HSA	new	n.a.
chr5_inv17	chr5:175971612-176142164	yes	yes	chr5:176173976-176302146	no	yes	het	no	Porubsky et al., 2020	n.d.	n.d.	n.a.
chr5_inv18	chr5:176193141-176302114	yes	yes	chr5:177691484-178071986	yes	yes	hom	no	Porubsky et al., 2020	indipendent inv in PPY and NSI	new	n.a.
chr5_inv19	chr5:177691484-178071986	yes	yes	chr5:181245243-181477813	yes	yes	hom	no	n.a.	n.d.	n.d.	n.a.
chr6_inv1	chr6:15903539-15904882	no	no	chr6:15934775-15935910	no	no	hom	no	n.a.	NSI	new	n.a.
chr6_inv2	chr6:36151126-36151778	no	no	chr6:36351301-36364683	no	yes	het	no	n.a.	NSI	new	n.a.
chr6_inv3	chr6:44748072-44748784	no	no	chr6:44759165-44760777	no	no	het	no	n.a.	n.d.	n.d.	n.a.
chr6_inv4	chr6:48668838-48669707	no	no	chr6:48698871-48700309	no	no	hom	no	n.a.	NSI	new	n.a.
chr6_inv5	chr6:49066567-49077596	no	no	chr6:49099147-49100266	no	no	hom	no	Maggiolini et al., 2020, Porubsky et al., 2020	AGA anc	old	Maggiolini et al., 2020
chr6_inv6	chr6:61542981-61543758	no	yes	chr6:61557467-61557771	no	yes	hom	no	Maggiolini et al., 2020	GA anc	new	n.a.
chr6_inv7	chr6:71264020-71264021	no	no	chr6:71274461-71274462	no	no	het	no	n.a.	NSI	new	n.a.
chr6_inv8	chr6:77862047-77864466	no	yes	chr6:77876996-77877360	no	yes	hom	no	n.a.	NSI	new	n.a.
chr6_inv9	chr6:85946750-85946751	no	no	chr6:85962386-85962609	no	no	het	no	n.a.	NSI	new	n.a.
chr6_inv10	chr6:86628690-86629320	no	no	chr6:86714249-86714399	no	no	hom	no	n.a.	NSI	new	n.a.
chr6_inv11	chr6:88405433-88406857	no	no	chr6:88421133-88421134	no	no	het	no	n.a.	n.d.	n.d.	n.a.
chr6_inv12	chr6:103223396-103225622	no	no	chr6:103237234-103238596	no	no	hom	no	n.a.	NSI	new	n.a.
chr6_inv13	chr6:115101997-115108910	no	no	chr6:115141500-115149837	no	no	hom	no	n.a.	NSI	new	n.a.
chr6_inv14	chr6:121619359-121619711	no	no	chr6:121675624-121676706	no	no	hom	no	Maggiolini et al., 2020	GA anc	old	Maggiolini et al., 2020
chr6_inv15	chr6:122217139-122227617	no	no	chr6:122231027-122238768	no	no	het	no	n.a.	NSI	new	n.a.
chr6_inv16	chr6:162557329-162557332	no	yes	chr6:162639323-162639324	no	yes	het	no	n.a.	NSI	new	n.a.
chr6_inv17	chr6:167217868-167231751	yes	yes	chr6:167362885-167395695	yes	yes	hom	no	Puig et al., 2020, Chaisson et al., 2019	NSI	new	n.a.
chr7_inv1	chr7:2531265-2537709	yes	no	chr7:2674989-2679807	yes	yes	hom	no	Catacchio et al., 2018, Maggiolini et al., 2020, Porubsky et al., 2020	AGA	old	Catacchio et al., 2018, Maggiolini et al., 2020
chr7_inv2	chr7:2615362-2616388	no	no	chr7:2674989-2679807	yes	yes	het	yes	n.a.	NSI	new	n.a.
chr7_inv3	chr7:5799052-6011669	yes	yes	chr7:6708863-7002696	yes	yes	het	no	Porubsky et al., 2020 ,Chaisson et al., 2019,Catacchio et al., 2018,Puig et al., 2020,Sanders et al., 2016	Ape ANC (polymorphic in HSA and PPY)	updated	Catacchio et al., 2018
chr7_inv4	chr7:39762107-39805392	yes	yes	chr7:39882965-39883628	no	no	hom	no	Maggiolini et al., 2020, Porubsky et al., 2020	AGA anc	new	n.a.
chr7_inv5	chr7:51423631-51425593	yes	no	chr7:51448849-51450339	no	no	hom	no	Maggiolini et al., 2020	AGA anc	old	Maggiolini et al., 2020
chr7_inv6	chr7:53187270-53189039	no	no	chr7:53856721-53863115	yes	no	hom	no	Catacchio et al., 2018, Maggiolini et al., 2020, Porubsky et al., 2020	HSA	old	Catacchio et al., 2018, Maggiolini et al., 2020
chr7_inv7	chr7:55661799-55730809	yes	yes	chr7:56175265-56229080	yes	no	hom	no	Maggiolini et al., 2020	n.d.	n.d.	n.a.
chr7_inv8	chr7:67293984-67339328	yes	yes	chr7:72511370-73324059	yes	yes	hom	no	Maggiolini et al., 2020	AGA anc	old	Maggiolini et al., 2020
chr7_inv9	chr7:72511370-73324059	yes	yes	chr7:73489945-73531824	yes	yes	hom	no	n.a.	NSI	new	n.a.
chr7_inv10	chr7:74924978-75019580	yes	yes	chr7:75073820-75218457	yes	yes	hom	no	Porubsky et al., 2020	n.d.	n.d.	n.a.
chr7_inv11	chr7:86252062-86252612	no	no	chr7:86463507-86465979	no	no	hom	no	n.a.	NSI	new	n.a.
chr7_inv12	chr7:140469738-140469821	no	yes	chr7:140484996-140485033	no	no	het	no	n.a.	NSI	new	n.a.
chr7_inv13	chr7:143521617-143728337	yes	yes	chr7:143741710-143874554	yes	yes	hom	no	Sanders et al., 2016, Maggiolini et al., 2020, Porubsky et al., 2020 , Chaisson et al., 2019	HSA (poly)	old	Maggiolini et al., 2020
chr8_inv1	chr8:2148538-2149653	no	no	chr8:2230411-2321681	yes	no	hom	no	n.a.	NSI	new	n.a.
chr8_inv2	chr8:2230411-2321681	yes	no	chr8:2399963-2486898	yes	no	hom	no	Maggiolini et al., 2020, Catacchio et al., 2018, Porubsky et al., 2020 , Chaisson et al., 2019, Puig et al., 2020	pan-HSA anc (polymorphic in HSA and PTR), or indipendent inv HSA (polymorphic) and PTR (polymorphic)	new	n.a.
chr8_inv3	chr8:16285842-16286439	no	no	chr8:16303670-16304353	no	no	hom	no	Maggiolini et al., 2020, Porubsky et al., 2020	HSA	old	Maggiolini et al., 2020
chr8_inv4	chr8:53367500-53367531	no	no	chr8:53379112-53379867	no	no	het	no	n.a.	n.d.	n.d.	n.a.
chr8_inv5	chr8:61474608-61475096	no	yes	chr8:61484635-61485623	no	yes	het	no	n.a.	n.d.	n.d.	n.a.
chr8_inv6	chr8:65506845-65507502	no	no	chr8:65521218-65523735	no	no	hom	no	n.a.	NSI	new	n.a.
chr8_inv7	chr8:84972789-84974786	no	no	chr8:85013738-85013739	no	no	hom	no	Maggiolini et al., 2020	AGA anc	old	Maggiolini et al., 2020
chr8_inv8	chr8:85578439-85583147	yes	no	chr8:85637045-85645379	yes	no	hom	no	Porubsky et al., 2020	n.d.	n.d.	n.a.
chr8_inv9	chr8:111940567-111941486	no	no	chr8:111961147-111962492	no	no	hom	no	Maggiolini et al., 2020, Porubsky et al., 2020	HSA-Pan anc	updated	Maggiolini et al., 2020
chr8_inv10	chr8:142918484-142921505	no	no	chr8:142925934-142935539	no	no	hom	no	Maggiolini et al., 2020	n.d.	n.d.	n.a.
chr9_inv1	chr9:30948464-31003372	no	no	chr9:32488044-32489213	no	yes	hom	no	n.a.	NSI	new	n.a.
chr9_inv2	chr9:32955856-32955884	no	no	chr9:32965824-32966003	no	no	het	no	n.a.	n.d.	n.d.	n.a.
chr9_inv3	chr9:34808004-34813037	no	no	chr9:34824719-34827328	no	no	hom	no	n.a.	NSI	new	n.a.
chr9_inv4	chr9:34843828-34862854	no	no	chr9:34869056-34869155	no	no	hom	no	n.a.	NSI	new	n.a.
chr9_inv5	chr9:34869056-34869155	no	no	chr9:34882842-34885281	no	no	het	no	n.a.	n.d.	n.d.	n.a.
chr9_inv6	chr9:78718330-78719994	no	no	chr9:78743200-78743564	no	no	hom	no	n.a.	NSI	new	n.a.
chr9_inv7	chr9:86370594-86372838	no	no	chr9:86383502-86383692	no	no	het	no	n.a.	n.d.	n.d.	n.a.
chr9_inv8	chr9:92833426-92838129	no	yes	chr9:92881783-92881851	yes	no	hom	no	n.a.	NSI	new	n.a.
chr9_inv9	chr9:115975910-115976852	no	no	chr9:116037066-116037815	no	no	hom	no	Maggiolini et al., 2020, Porubsky et al., 2020	AGA anc	new	n.a.
chr9_inv10	chr9:123976046-123980473	no	no	chr9:123990799-123992838	no	no	hom	no	Giner-delgado et al., 2020, Chaisson et al., 2019, Maggiolini et al., 2020, Porubsky et al., 2020	HSA (polymorphic)	new	n.a.
chr10_inv1	chr10:5047901-5050996	no	yes	chr10:5062361-5062758	yes	yes	het	no	n.a.	n.d.	n.d.	n.a.
chr10_inv2	chr10:6444559-6444981	no	yes	chr10:6453389-6456589	no	yes	het	no	n.a.	Ape Anc (polymorphic in nonhuman apes)	new	n.a.
chr10_inv3	chr10:6824567-6824568	no	yes	chr10:6833055-6837856	no	yes	het	no	n.a.	n.d.	n.d.	n.a.
chr10_inv4	chr10:6926342-6926550	no	no	chr10:7155214-7155721	no	no	hom	no	n.a.	NSI	new	n.a.
chr10_inv5	chr10:12046718-12047669	no	no	chr10:14973918-15026892	yes	yes	hom	no	n.a.	NSI	new	n.a.
chr10_inv6	chr10:18553166-18553375	no	yes	chr10:18563471-18563839	yes	yes	hom	no	n.a.	n.d.	n.d.	n.a.
chr10_inv7	chr10:29448354-29448405	no	yes	chr10:29465371-29465406	no	yes	het	no	n.a.	n.d.	n.d.	n.a.
chr10_inv8	chr10:29478726-29519639	yes	yes	chr10:29561782-29591391	yes	yes	het	no	Porubsky et al., 2020	Catarrhini (polymorphic in MMU, NSI and PPY), or indipendent inv NSI PPY MMU	new	n.a.
chr10_inv9	chr10:46086954-46514318	yes	yes	chr10:46560649-46991804	yes	yes	hom	no	n.a.	n.d.	n.d.	n.a.
chr10_inv10	chr10:46561302-46991666	yes	yes	chr10:49843779-50201630	yes	yes	hom	no	Maggiolini et al., 2020	GA	old	Maggiolini et al., 2020
chr10_inv11	chr10:46561417-46870207	yes	yes	chr10:47457081-47500010	yes	yes	hom	yes	Catacchio et al., 2018, Maggiolini et al., 2020	HSA (polymorphic)	old	Catacchio et al., 2018, Maggiolini et al., 2020
chr10_inv12	chr10:49843779-50201630	yes	yes	chr10:50653535-50784092	yes	yes	hom	no	Maggiolini et al., 2020	GA	new	n.a.
chr10_inv13	chr10:59478042-59478153	no	no	chr10:59498520-59499043	no	no	hom	no	n.a.	NSI	new	n.a.
chr10_inv14	chr10:66427602-66428401	no	yes	chr10:66448416-66448479	no	yes	het	no	n.a.	NSI	new	n.a.
chr10_inv15	chr10:67559060-67560385	no	yes	chr10:67576434-67583808	no	yes	hom	no	Maggiolini et al., 2020, Porubsky et al., 2020	AGA	new	n.a.
chr10_inv16	chr10:79500523-79551950	yes	yes	chr10:80208464-80258284	yes	yes	hom	no	Porubsky et al., 2020, Catacchio et al., 2018, Sanders et al., 20162018	indipendent inv in NSI and HSA-PAN Anc (polymorphic in HSA)	new	n.a.
chr11_inv1	chr11:1135191-1136014	no	no	chr11:1210221-1210222	no	no	het	no	n.a.	NSI	new	n.a.
chr11_inv2	chr11:23147481-23148322	no	no	chr11:23219869-23221907	no	no	hom	no	n.a.	NSI	new	n.a.
chr11_inv3	chr11:37952270-37953623	no	yes	chr11:37977734-37978313	no	no	hom	no	n.a.	NSI	new	n.a.
chr11_inv4	chr11:45787645-45787646	no	no	chr11:45920813-45921514	no	no	hom	no	n.a.	NSI	new	n.a.
chr11_inv5	chr11:56703936-56705906	no	no	chr11:56723950-56734772	no	no	hom	no	n.a.	n.d.	n.d.	n.a.
chr11_inv6	chr11:56885879-56886408	no	no	chr11:56938603-56949107	no	no	hom	no	n.a.	NSI	new	n.a.
chr11_inv7	chr11:73725598-73726282	no	yes	chr11:73830679-73830680	no	yes	het	no	n.a.	NSI	new	n.a.
chr11_inv8	chr11:88220523-88226022	no	no	chr11:88243369-88246556	no	no	hom	no	n.a.	NSI	new	n.a.
chr11_inv9	chr11:105172654-105172674	no	no	chr11:105190513-105192202	no	no	het	no	n.a.	NSI	new	n.a.
chr11_inv10	chr11:132615521-132616715	no	yes	chr11:132638159-132638306	no	yes	hom	no	Maggiolini et al., 2020, Porubsky et al., 2020	HSA	old	Maggiolini et al., 2020
chr11_inv11	chr11:134102286-134103881	no	yes	chr11:134112668-134115290	no	yes	hom	no	n.a.	n.d.	new	n.a.
chr12_inv1	chr12:20762293-20764029	no	no	chr12:20773043-20775312	no	no	het	no	n.a.	n.d.	n.d.	n.a.
chr12_inv2	chr12:28641589-28657084	no	no	chr12:28673766-28674318	no	no	hom	no	n.a.	HSA	new	n.a.
chr12_inv3	chr12:30854652-30862376	no	no	chr12:31012165-31013203	yes	no	hom	no	n.a.	NSI	new	n.a.
chr12_inv4	chr12:55138839-55150182	no	no	chr12:55214128-55255419	no	yes	hom	no	n.a.	NSI	new	n.a.
chr12_inv5	chr12:93902236-93902565	no	yes	chr12:94097520-94098755	no	no	hom	no	n.a.	NSI	new	n.a.
chr12_inv6	chr12:100634857-100636335	no	no	chr12:100647573-100648223	no	no	het	no	n.a.	n.d.	n.d.	n.a.
chr12_inv7	chr12:105299928-105300061	no	no	chr12:105313987-105316352	no	yes	het	no	n.a.	n.d.	n.d.	n.a.
chr12_inv8	chr12:126141136-126159483	no	no	chr12:126317445-126317864	no	no	hom	no	n.a.	NSI	new	n.a.
chr13_inv1	chr13:24536847-24610792	yes	yes	chr13:24926979-25032034	yes	yes	hom	no	Porubsky et al., 2020	indipendent inv in NSI and PPY (polymorphic in PPY), or Ape ANC and recurrent inv in PPY (polymorphic in PPY)	new	n.a.
chr13_inv2	chr13:26875034-26876452	no	no	chr13:26899618-26900097	no	no	het	no	n.a.	NSI	new	n.a.
chr13_inv3	chr13:34277292-34277417	no	no	chr13:34317570-34319869	no	no	hom	no	n.a.	NSI	new	n.a.
chr13_inv4	chr13:45376512-45384037	yes	yes	chr13:45455982-45456364	no	no	hom	no	Maggiolini et al., 2020, Porubsky et al., 2020	AGA	new	n.a.
chr13_inv5	chr13:52162531-52343861	yes	yes	chr13:52477115-52643802	yes	yes	hom	no	Chaisson et al., 2019, Porubsky et al., 2020	Ape ANC (polymorphic in PPY)	new	n.a.
chr13_inv6	chr13:55408539-55409899	no	no	chr13:55425406-55425929	no	no	hom	no	Maggiolini et al., 2020, Porubsky et al., 2020	AGA	new	n.a.
chr13_inv7	chr13:61886038-61886477	no	no	chr13:61913120-61936277	no	no	hom	no	n.a.	NSI	new	n.a.
chr13_inv8	chr13:63716757-63727414	yes	yes	chr13:63737424-63769529	yes	yes	hom	no	Chaisson et al., 2019,Giner-delgado et al., 2020, Maggiolini et al., 2020, Porubsky et al., 2020	HSA-PAN Anc and ILS PTR, or indipendent inv in HSA and PPA	new	n.a.
chr13_inv9	chr13:82449712-82450328	no	no	chr13:82793322-82795330	no	no	hom	no	n.a.	NSI	new	n.a.
chr13_inv10	chr13:95851841-96104749	no	yes	chr13:97847715-97982957	no	yes	hom	no	n.a.	NSI	new	n.a.
chr14_inv1	chr14:19608478-20174818	yes	yes	chr14:20825991-20981983	yes	yes	hom	no	n.a.	NSI	new	n.a.
chr14_inv2	chr14:19609932-19987349	yes	yes	chr14:20132586-20282762	yes	yes	het	yes	Maggiolini et al., 2020, Catacchio et al., 2018	Ape ANC (polymorphic in NSI)	new	n.a.
chr14_inv3	chr14:20843541-20848107	no	no	chr14:20873611-20881709	yes	no	hom	yes	n.a.	NSI	new	n.a.
chr14_inv4	chr14:35322639-35323199	no	no	chr14:35372020-35374216	no	no	hom	no	n.a.	NSI	new	n.a.
chr14_inv5	chr14:35912488-35912652	no	no	chr14:35922899-35923714	no	no	hom	no	Maggiolini et al., 2020, Porubsky et al., 2020	HSA	new	n.a.
chr14_inv6	chr14:42038253-42039499	no	no	chr14:42051299-42051776	no	no	hom	no	Maggiolini et al., 2020, Porubsky et al., 2020	n.d.	n.d.	n.a.
chr14_inv7	chr14:43966238-43966548	no	no	chr14:44025374-44031019	no	no	het	no	n.a.	NSI	new	n.a.
chr14_inv8	chr14:55987758-55987774	no	no	chr14:56000802-56000804	no	no	het	no	n.a.	n.d.	n.d.	n.a.
chr14_inv9	chr14:61005453-61005975	no	yes	chr14:61014043-61015784	no	yes	het	no	n.a.	n.d.	n.d.	n.a.
chr14_inv10	chr14:70494656-70498784	no	no	chr14:70503611-70504764	no	no	het	no	n.a.	n.d.	n.d.	n.a.
chr15_inv1	chr15:19822634-22783590	yes	yes	chr15:23039619-23465961	yes	yes	het	no	Sanders et al., 20162018, Catacchio et al., 2018, Porubsky et al., 2020	n.d.	n.d.	n.a.
chr15_inv2	chr15:23039619-23465961	yes	yes	chr15:32153029-32607570	yes	yes	hom	no	Maggiolini et al., 2020	n.d.	n.d.	n.a.
chr15_inv3	chr15:40122398-40125290	yes	no	chr15:40153284-40155440	yes	no	het	no	Porubsky et al., 2020	indipendent inv in GGO and NSI	new	n.a.
chr15_inv4	chr15:59377896-59377897	no	no	chr15:59426794-59426796	no	no	het	no	Porubsky et al., 2020	NSI	new	n.a.
chr15_inv5	chr15:79492679-79492851	no	no	chr15:79518332-79519212	no	no	hom	no	n.a.	NSI	new	n.a.
chr15_inv6	chr15:82292020-82533433	yes	yes	chr15:84038523-84593846	yes	yes	hom	no	Maggiolini et al., 2019, Maggiolini et al., 2020, Porubsky et al., 2020	AGA (ILS Pan), or AGA and recurrent inv in Pan, or indipendent inv in GGO and HSA	updated	Maggiolini et al., 2019
chr15_inv7	chr15:84038523-84593846	yes	yes	chr15:85169521-85286294	yes	yes	hom	no	Maggiolini et al., 2019	HSA-PAN (polymorphic in PAN)	updated	Maggiolini et al., 2019
chr15_inv8	chr15:99740979-99990576	no	yes	chr15:101583105-101939501	yes	yes	hom	no	n.a.	NSI	new	n.a.
chr16_inv1	chr16:2729065-2730406	no	no	chr16:2735701-2748809	no	yes	hom	no	Porubsky et al., 2020	indipendent inv in NSI and GGO	new	n.a.
chr16_inv2	chr16:2781373-2789587	no	yes	chr16:2872337-2873878	no	no	hom	no	n.a.	NSI	new	n.a.
chr16_inv3	chr16:16568591-16572054	yes	no	chr16:18073157-18782797	yes	yes	hom	no	Maggiolini et al., 2020,Catacchio et al., 2018, Porubsky et al., 2020 , Sanders et al., 2016, Chaisson et al., 2019	n.d. (polymorphic in HSA)	n.d.	n.a.
chr16_inv4	chr16:21342884-21559095	yes	yes	chr16:21728768-21936253	yes	yes	hom	no	Maggiolini et al., 2020	AGA anc (polymorphic in HSA)	old	Maggiolini et al., 2020
chr16_inv5	chr16:21728768-21936253	yes	yes	chr16:22417156-22611067	yes	yes	hom	no	Maggiolini et al., 2020	AGA (ILS Pan; polymorphic in HSA) or AGA and recurrent inv in Pan (HSA poly)	updated	Maggiolini et al., 2020
chr16_inv6	chr16:28590202-28811731	yes	yes	chr16:29037130-29638840	yes	yes	hom	no	Catacchio et al., 2018, Maggiolini et al., 2020	recuurent inv AGA ancestor - NSI	updated	Catacchio et al., 2018, Maggiolini et al., 2020
chr16_inv7	chr16:29035196-29634971	yes	yes	chr16:30186376-30339222	yes	yes	hom	no	Catacchio et al., 2018, Maggiolini et al., 2020	n.d.	n.d.	Catacchio et al., 2018, Maggiolini et al., 2020
chr16_inv8	chr16:31629783-31667839	yes	no	chr16:31807181-31949791	yes	yes	hom	no	n.a.	NSI	new	n.a.
chr16_inv9	chr16:46382606-46744157	yes	yes	chr16:48147910-48328855	no	yes	hom	no	n.a.	NSI	new	n.a.
chr16_inv10	chr16:53345721-53346608	no	no	chr16:53413689-53413705	no	no	het	no	Porubsky et al., 2020	NSI	new	n.a.
chr16_inv11	chr16:69943175-70249765	yes	yes	chr16:74328119-74330338	yes	no	hom	no	Maggiolini et al., 2020, Catacchio et al., 2018, Porubsky et al., 2020	AGA (ILS Pan) or AGA and recurrent inv in Pan	updated	Maggiolini et al., 2020, Catacchio et al., 2018io2018
chr16_inv12	chr16:75201971-75202902	no	no	chr16:75220247-75221812	no	yes	hom	no	Maggiolini et al., 2020, Porubsky et al., 2020 , ginerdelgado, Sanders et al., 2016	HSApoly	new	n.a.
chr17_inv1	chr17:3050622-3149833	yes	yes	chr17:3169950-3253845	yes	yes	hom	no	Maggiolini et al., 2020, Catacchio et al., 2018, Porubsky et al., 2020	n.d.	n.d.	n.a.
chr17_inv2	chr17:14214864-14215233	no	no	chr17:14254371-14254372	no	no	hom	no	Maggiolini et al., 2020, Porubsky et al., 2020	AGA anc	old	Maggiolini et al., 2020
chr17_inv3	chr17:15163177-15171358	no	no	chr17:15514615-15889875	yes	yes	hom	no	n.a.	NSI	new	n.a.
chr17_inv4	chr17:15514615-15889875	yes	yes	chr17:16656612-16906520	yes	yes	hom	no	Maggiolini et al., 2020, Catacchio et al., 2018	GA anc	old	Maggiolini et al., 2020, Catacchio et al., 2018io2018
chr17_inv5	chr17:16656311-16906723	yes	yes	chr17:18374019-18847673	yes	yes	hom	no	Porubsky et al., 2020	Ape ANC (ILS HSA-PTR or recurrent inv in HSA PTR)	new	n.a.
chr17_inv6	chr17:18374019-18847673	yes	yes	chr17:18930094-18937686	no	yes	hom	no	n.a.	NSI	new	n.a.
chr17_inv7	chr17:19473416-19501925	no	no	chr17:19767917-19768408	no	no	hom	no	n.a.	NSI	new	n.a.
chr17_inv8	chr17:30549975-30582231	yes	yes	chr17:31008307-31051215	yes	yes	het	yes	n.a.	NSI	new	n.a.
chr17_inv9	chr17:30549975-30582231	yes	yes	chr17:31936222-32131828	yes	yes	hom	no	Porubsky et al., 2020	indipendent inv in PPY and NSI	new	n.a.
chr17_inv10	chr17:35190621-35196015	yes	yes	chr17:36149904-36458015	yes	yes	hom	no	n.a.	NSI	new	n.a.
chr17_inv11	chr17:36149904-36458015	yes	yes	chr17:37751154-38315332	yes	yes	hom	no	Maggiolini et al., 2020, Porubsky et al., 2020	AGA anc (polymorphic in HSA)	old	Maggiolini et al., 2020
chr17_inv12	chr17:46218490-46708693	yes	yes	chr17:47013564-47095105	no	no	hom	no	Maggiolini et al., 2020, Catacchio et al., 2018	n.d.	n.d.	n.a.
chr17_inv13	chr17:59547732-59551905	no	no	chr17:59974729-60127093	yes	yes	hom	no	n.a.	NSI	new	n.a.
chr17_inv14	chr17:74250623-74262281	no	yes	chr17:74338469-74375642	no	yes	hom	no	n.a.	NSI	new	n.a.
chr17_inv15	chr17:74892065-74892284	no	yes	chr17:77124367-77124591	no	yes	hom	no	n.a.	NSI	new	n.a.
chr17_inv16	chr17:82319296-82320392	no	no	chr17:83204528-83247176	yes	yes	hom	no	n.a.	NSI	new	n.a.
chr18_inv1	chr18:6297384-6298049	no	yes	chr18:6310922-6311155	no	yes	het	no	n.a.	NSI	new	n.a.
chr18_inv2	chr18:10592936-10656069	yes	yes	chr18:12056097-12231085	yes	yes	hom	no	Maggiolini et al., 2020, Porubsky et al., 2020	AGA anc	old	Maggiolini et al., 2020
chr18_inv3	chr18:30455983-30458426	no	no	chr18:30471186-30471511	no	no	hom	no	n.a.	NSI	new	n.a.
chr18_inv4	chr18:31803396-31803903	no	no	chr18:31813104-31813767	no	no	het	no	n.a.	n.d.	n.d.	n.a.
chr18_inv5	chr18:69087446-69092883	no	no	chr18:69199511-69204440	no	no	hom	no	n.a.	NSI	new	n.a.
chr19_inv1	chr19:37043218-37045107	yes	no	chr19:37053831-37054588	no	no	het	no	n.a.	n.d.	n.d.	n.a.
chr19_inv2	chr19:39554304-39572941	no	no	chr19:39688778-39709373	no	yes	hom	no	Maggiolini et al., 2020, Porubsky et al., 2020	HSA	old	Maggiolini et al., 2020
chr19_inv3	chr19:49958306-49960761	yes	yes	chr19:49969979-49972365	yes	yes	hom	no	n.a.	GA anc	new	n.a.
chr20_inv1	chr20:11413881-11424216	no	no	chr20:11431152-11437270	no	no	hom	no	n.a.	NSI	new	n.a.
chr21_inv1	chr21:34648084-34648251	no	no	chr21:34664647-34667129	no	no	hom	no	n.a.	NSI	new	n.a.
chr22_inv1	chr22:18158899-19034905	yes	yes	chr22:20667473-20699028	yes	yes	hom	no	Porubsky et al., 2020	indipendent inv in PPY and NSI	new	n.a.
chr22_inv2	chr22:21011744-21563790	yes	yes	chr22:23303313-23676808	yes	yes	hom	no	n.a.	n.d.	n.d.	n.a.
chr22_inv3	chr22:22074622-22088513	no	no	chr22:22093585-22111244	no	no	het	yes	n.a.	n.d.	n.d.	n.a.
chr22_inv4	chr22:22172734-22176125	no	no	chr22:22181126-22187893	no	no	hom	yes	n.a.	NSI	new	n.a.
chr22_inv5	chr22:24236843-24301022	yes	yes	chr22:24598077-24683426	yes	yes	hom	no	n.a.	NSI	new	n.a.
chr22_inv6	chr22:29399332-29443906	yes	yes	chr22:32130782-32197364	yes	yes	het	no	n.a.	NSI	new	n.a.
chr22_inv7	chr22:32321056-32321196	yes	no	chr22:32969545-33099669	no	yes	hom	no	n.a.	NSI	new	n.a.
*NCBI RefSeq genes, curated subset - Homo sapiens 109.20211119 (2021-11-23)
HSA=Homo sapiens; PTR=Pan troglodytes; PPY=Pongo pygmaeus; NSI=Nomascus siki; MMU=Macaca mulatta; GA=great apes; AGA=african great apes; anc=ancestor; n.d.=not determined; n.a.=not available

## Sheet: Supplemental_Table_S6
Supplemental Table S6. FISH results of inversion validations.
Inversion (HSA inversion name)	Mapping HSA (GRch38/hg38)	Size	metaphase/interphase FISH	internal probe 1	Mapping HSA (GRch38/hg38)	internal probe 2	Mapping HSA (GRch38/hg38)	external probe	Mapping HSA (GRch38/hg38)
NSIvsNLE_inv2 (chr5_inv18)	chr5:175901552-178066987	2165435	interphase	CH271-465D19	chr5:177310087-177437918	CH271-91K06	chr5:176665211-176835656	CH271-82D07	chr5:175743875-175904939
NSIvsNLE_inv3 (chr16_inv7)	chr16:46506428 48326681	1820253	interphase	CH271-476K17	chr16:47938707-48156436	CH271-346P10	chr16:46911443-47135370	CH271-363O11	chr16:48839295-49031352
NSIvsNLE_inv5 (chr18_inv2)	chr18:10626167-12206325	1580158	interphase	ABC8-41098200K21	chr18:10668791-10705204	WI2-2402P07_G248P80901H4	chr18:11979270-12019549	RP11-67I20	chr18:10009826-10188749
NSIvsNLE_inv6 (chr13_inv10)	chr13:95838601-97968266	2129665	interphase	RP11-320H3	chr13:96409886-96579101	CH271-456E20	chr13:97586492-97810251	CH271-298K06	chr13:95522227-95705382
NSIvsNLE_inv8 (chr15_inv8)	chr15:99703334-101437716	1734382	interphase	CH271-55A02	chr15:100228478-100401899	CH271-292H08	chr15:101376803-101595929	CH271-105N16	chr15:99406857-99572842
NSIvsNLE_inv9	chr5:43026103-45898353	2872250	metaphase	RP11-929P16	chr5:45300114-45509958	RP11-948O11	chr5:54033665-54201967	RP11-454A10	chr5:41693502-41861297
NSIvsNLE_inv10	chr5:50359213-54799886	4440673	metaphase	RP11-97O9	chr5:51325370-51486061	RP11-948O11	chr5:54033665-54201967	RP11-242G11	chr4:137566259-137741158
NSIvsNLE_inv12	chr22:29405356-32158778	2753422	interphase	CH271-100H10	chr22:29717672-29844442	CH271-264A10	chr22:31291903-31480059	CH271-356L11	chr22:32589207-32763062
NSIvsNLE_inv13	chr4:51793953-68724836	16930883	metaphase	RP11-646H6	chr1:195489110-195611074	RP11-452I17	chr1:52585083-52768909	RP11-1043B22	chr4:56113833-56311861
NSIvsNLE_inv14 (chr3_inv9)	chr3:195615012-197659743	2044731	interphase	CH271-33A13	chr3:196062718-196257419	CH271-117H08	chr3:197086530-197236371	CH271-19E01	chr3:195299556-195430080
NSIvsNLE_inv17	chr17:32111072-35170793	3059721	metaphase	CH271-64G18	chr17:32174859-32338421	CH271-342F17	chr17:34939696-35127851	CH271-51M20	chr2:56115457-56280095
NSIvsNLE_inv18 (chr17_inv6)	chr17:16895419-19185555	2290136	interphase	RP11-76J15	chr17:17152973-17328022	CH271-462C12	chr17:18096319-18308595	WI2-1478O16_G248P85658H8	chr17:19343298-19382471
NSIvsNLE_inv19 (chr17_inv15)	chr17:74895887-77120962	2225075	interphase	CH271-39J22	chr17:75438263-75624608	CH271-228C17	chr17:76748363-76910984	CH271-217D08	chr17:77308760-77494929
NSIvsNLE_inv20	chr11:45671749-48176479	2504730	interphase	CH271-281M05	chr11:46395524-46594378	CH271-422E23	chr11:47841484-48024227	CH271-64D18	chr11:45419707-45598308
NSIvsNLE_inv25	chr19:46383531-47814309	1430778	interphase	CH271-40P14	chr19:46531481-46716614	CH271-111G09	chr19:47582551-47745534	CH271-291H15	chr19:48572141-48780069
NSIvsNLE_inv30 (chr2_inv16)	chr2:213118558-230901570	17783012	metaphase	CH271-74O21	chr2:214334551-214526802	CH271-119L09	chr2:230015930-230191690	CH271-7P18	chr2:204080457-204253109

## Sheet: Supplemental_Table_S7
Supplemental Table S7. List of the gibbon (CH271) clones used for the BES pair mapping analysis.
Inversion	BES validation	BES clone	BES clone mapping
chr1_inv2	inv by discordant BES pair mapping	CH271-51L18,Inversion_wrongorientation	chr1:47043820-47175961
chr1_inv3	dir by concordant BES pair mapping	CH271-429E04	chr1:53223494-53410982
chr1_inv4	inv by discordant BES pair mapping	CH271-250H10,Inversion_wrongorientation	chr1:55751142-55944351
chr1_inv5	inv by discordant BES pair mapping	CH271-31B01,Inversion_wrongorientation	chr1:65555445-65749758
chr1_inv6	inv by discordant BES pair mapping	CH271-273B23,Inversion_wrongorientation	chr1:82325469-82504309
chr1_inv9	inv by discordant BES pair mapping	CH271-300I13,Inversion_wrongorientation	chr1:103811278-104022197
chr1_inv10	inv by discordant BES pair mapping	CH271-388E16,Inversion_wrongorientation	chr1:194116059-194308009
chr1_inv11	inv by discordant BES pair mapping	CH271-407M01,Inversion_wrongorientation	chr1:194958729-195099473
chr1_inv14	inv by discordant BES pair mapping	CH271-61M03,Inversion_wrongorientation	chr1:238215915-238412183
chr2_inv3	dir by concordant BES pair mapping	CH271-357D17	chr2:27749675-27950715
chr2_inv5	inv by discordant BES pair mapping	CH271-256C03,Inversion_wrongorientation	chr2:82333979-82544302
chr2_inv12	inv by discordant BES pair mapping	CH271-53B08,Inversion_wrongorientation	chr2:180609341-180779031
chr2_inv13	inv by discordant BES pair mapping	CH271-316N17,Inversion_wrongorientation	chr2:180609455-180824360
chr2_inv14	inv by discordant BES pair mapping	CH271-91G22,Inversion_wrongorientation	chr2:192584265-192763887
chr2_inv16	dir by concordant BES pair mapping	CH271-261O06,Deletion	chr2:209582391-228231632
chr3_inv1	inv by discordant BES pair mapping	CH271-394I08,Inversion_wrongorientation	chr3:1808954-2063302
chr3_inv2	inv by discordant BES pair mapping	CH271-454G13,Inversion_wrongorientation	chr3:17801861-17986595
chr3_inv4	inv by discordant BES pair mapping	CH271-185K01,Inversion_wrongorientation	chr3:109705064-109914167
chr3_inv5	inv by discordant BES pair mapping	CH271-476M01,Inversion_wrongorientation	chr3:116741926-116915538
chr3_inv8	inv by discordant BES pair mapping	CH271-97O16,Inversion_wrongorientation	chr3:162779940-162952743
chr4_inv1	inv by discordant BES pair mapping	CH271-54G22,Inversion_wrongorientation	chr4:372345-660512
chr4_inv2	inv by discordant BES pair mapping	CH271-380A16,Inversion_toolarge	chr4:4214901-9878818
chr4_inv3	inv by discordant BES pair mapping	CH271-18N01,Inversion_wrongorientation	chr4:35572076-35786286
chr4_inv4	inv by discordant BES pair mapping	CH271-145N21,Inversion_wrongorientation	chr4:37609604-37796707
chr4_inv5	inv by discordant BES pair mapping	CH271-177E13,Inversion_wrongorientation	chr4:45988903-46135421
chr4_inv6	inv by discordant BES pair mapping	CH271-384E18,Inversion_wrongorientation	chr4:60935217-61129326
chr4_inv7	inv by discordant BES pair mapping	CH271-86M09,Inversion_wrongorientation	chr4:62255257-62413938
chr4_inv9	dir by concordant BES pair mapping	CH271-187O04	chr4:64068799-64301462
chr4_inv15	inv by discordant BES pair mapping	CH271-230I06,Inversion_wrongorientation	chr4:106850463-107027499
chr4_inv19	inv by discordant BES pair mapping	CH271-88K18,Inversion_wrongorientation	chr4:132135696-132313600
chr4_inv20	dir by concordant BES pair mapping	CH271-236D03	chr4:134574114-134732105
chr5_inv2	inv by discordant BES pair mapping	CH271-304K12,Inversion_toolarge	chr5:7822442-8145903
chr5_inv3	inv by discordant BES pair mapping	CH271-380B11,Inversion_toolarge	chr5:17814112-18240703
chr5_inv6	inv by discordant BES pair mapping	CH271-100L16,Inversion_wrongorientation	chr5:27414652-27593629
chr5_inv7	dir by concordant BES pair mapping; inv by discordant BES pair mapping	CH271-66C05; CH271-145I12,Inversion_wrongorientation	chr5:42754946-42946385; chr5:42963749-43179390
chr5_inv8	inv by discordant BES pair mapping	CH271-282C19,Inversion_wrongorientation	chr5:92091569-92255950
chr5_inv11	inv by discordant BES pair mapping	CH271-437P09,Inversion_wrongorientation	chr5:101043496-101195396
chr6_inv1	inv by discordant BES pair mapping	CH271-173L03,Inversion_wrongorientation	chr6:15917622-16096284
chr6_inv2	dir by concordant BES pair mapping	CH271-205I1, CH271-404H06,Inversion_toolarge	chr6:36021395-36190974; chr6:36350438-61200425
chr6_inv4	inv by discordant BES pair mapping	CH271-30C16,Inversion_wrongorientation	chr6:48501805-48674360
chr6_inv10	inv by discordant BES pair mapping	CH271-73M13,Inversion_wrongorientation	chr6:86629741-86835458
chr6_inv14	inv by discordant BES pair mapping	CH271-415G04,Inversion_wrongorientation	chr6:121634444-121853524
chr6_inv16	dir by concordant BES pair mapping	CH271-164J08	chr6:162396938-162597748
chr6_inv17	inv by discordant BES pair mapping	CH271-424C05,Inversion_toolarge	chr6:167019608-167328487
chr7_inv1	inv by discordant BES pair mapping	CH271-79N20,Inversion_wrongorientation	chr7:2600336-2800000
chr7_inv6	inv by discordant BES pair mapping	CH271-81E20,Inversion_toolarge	chr7:53038572-53839803
chr7_inv8	inv by discordant BES pair mapping	CH271-462M12,Deletion	chr7:67304762-73628018
chr7_inv10	inv by discordant BES pair mapping	CH271-86D21,Inversion_wrongorientation	chr7:74829679-74955618
chr7_inv11	dir by concordant BES pair mapping	CH271-94I10	chr7:86252417-86431064
chr8_inv7	inv by discordant BES pair mapping	CH271-435E07,Inversion_wrongorientation	chr8:84805688-84992934
chr9_inv6	inv by discordant BES pair mapping; dir by concordant BES pair mapping	CH271-167P12; CH271-391B01,Inversion_wrongorientation	chr9:78740092-7895388; chr9:78727502-78898502
chr9_inv8	inv by discordant BES pair mapping	CH271-471L13,Inversion_wrongorientation	chr9:92669786-92848584
chr9_inv9	inv by discordant BES pair mapping	CH271-240D19,Inversion_wrongorientation	chr9:115852470-116004127
chr10_inv4	inv by discordant BES pair mapping	CH271-252P04,Inversion_toolarge	chr10:6679867-7155072
chr10_inv5	inv by discordant BES pair mapping	CH271-2M17,Inversion_toolarge	chr10:12046456-14877804
chr10_inv7	dir by concordant BES pair mapping	CH271-473K21	chr10:29457342-29654334
chr10_inv8	dir by concordant BES pair mapping	CH271-41O01	chr10:29515997-29713930
chr10_inv12	inv by discordant BES pair mapping	CH271-202N11,Inversion_toolarge	chr10:50321548-50799873
chr10_inv13	inv by discordant BES pair mapping	CH271-306J04,Inversion_wrongorientation	chr10:59480749-59669065
chr10_inv14	dir by concordant BES pair mapping	CH271-402H15; CH271-118K22,Deletion	chr10:66287460-66435475; chr10:66445271-87117819
chr10_inv17	inv by discordant BES pair mapping	CH271-127I05; CH271-378P19,Inversion_wrongorientation	chr10:79389179-79515696; chr10:80074089-80297577
chr11_inv1	dir by concordant BES pair mapping	CH271-434I23	chr11:953348-1158903
chr11_inv2	inv by discordant BES pair mapping	CH271-324F14,Inversion_wrongorientation	chr11:22938955-23171299
chr11_inv3	inv by discordant BES pair mapping	CH271-55F22,Inversion_wrongorientation	chr11:37963865-38130437
chr11_inv4	inv by discordant BES pair mapping	CH271-434B09,Inversion_wrongorientation	chr11:45828078-45965468
chr11_inv5	inv by discordant BES pair mapping	CH271-110H09,Inversion_wrongorientation	chr11:56703761-56928542
chr11_inv6	inv by discordant BES pair mapping	CH271-68E06,Inversion_wrongorientation	chr11:56901673-57104207
chr11_inv7	dir by concordant BES pair mapping	CH271-271G20	chr11:73533316-73731478
chr11_inv9	dir by concordant BES pair mapping	CH271-164A02	chr11:105173432-105377457
chr11_inv10	inv by discordant BES pair mapping	CH271-382J11,Inversion_wrongorientation	chr11:132445263-132627343
chr12_inv2	inv by discordant BES pair mapping	CH271-304H04,Inversion_wrongorientation	chr12:28666337-28880501
chr12_inv5	inv by discordant BES pair mapping	CH271-95F16	chr12:93915109-94085435
chr12_inv7	dir by concordant BES pair mapping	CH271-138H01	chr12:105122230-105302473
chr12_inv8	inv by discordant BES pair mapping	CH271-127K06,Inversion_wrongorientation	chr12:126083784-126192001
chr13_inv1	inv by discordant BES pair mapping	CH271-399C13	chr13:24453563-24595448
chr13_inv3	inv by discordant BES pair mapping	CH271-267O19,Inversion_wrongorientation	chr13:34304251-34519674
chr13_inv4	inv by discordant BES pair mapping	CH271-279E03,Inversion_wrongorientation	chr13:45392869-45614857
chr13_inv5	inv by discordant BES pair mapping	CH271-36A12,Deletion	chr13:40703627-52237318
chr13_inv6	inv by discordant BES pair mapping	CH271-255B22,Inversion_wrongorientation	chr13:55408957-55587651
chr13_inv7	inv by discordant BES pair mapping	CH271-58B18,Inversion_wrongorientation	chr13:61887112-62073702
chr13_inv9	inv by discordant BES pair mapping	CH271-204N18,Inversion_toolarge	chr13:82455398-82934779
chr14_inv3	dir by concordant BES pair mapping	CH271-283I14	chr14:20866292-21121379
chr14_inv4	inv by discordant BES pair mapping	CH271-452A18,Inversion_wrongorientation	chr14:35113688-35334554
chr14_inv6	inv by discordant BES pair mapping	CH271-324A20,Inversion_wrongorientation	chr14:41860820-42041944
chr14_inv7	dir by concordant BES pair mapping	CH271-444F11	chr14:43967538-44167958
chr15_inv4	dir by concordant BES pair mapping	CH271-131B11	chr15:59268431-59382953
chr15_inv5	inv by discordant BES pair mapping	CH271-308P03,Inversion_wrongorientation	chr15:79287229-79514845
chr15_inv7	inv by discordant BES pair mapping	CH271-479O19,Inversion_toolarge	chr15:84595509-85453935
chr15_inv8	dir by concordant BES pair mapping	CH271-259B01,Inversion_toolarge	chr15:99982700-101713541
chr16_inv11	inv by discordant BES pair mapping	CH271-129P24,Inversion_toolarge	chr16:16097135-70072321
chr17_inv2	inv by discordant BES pair mapping	CH271-307M18,Inversion_toolarge	chr17:13865774-14218307
chr18_inv1	dir by concordant BES pair mapping	CH271-71J15	chr18:6152627-6306171
chr18_inv2	dir by concordant BES pair mapping	CH271-208L05	chr18:12128165-12314290
chr18_inv4	dir by concordant BES pair mapping	CH271-311B07	chr18:31601523-31809799
chr18_inv5	inv by discordant BES pair mapping	CH271-213K17,Inversion_wrongorientation	chr18:68959856-69168854
chr19_inv2	inv by discordant BES pair mapping	CH271-99G05,Inversion_wrongorientation	chr19:39405922-39658541
chr20_inv1	inv by discordant BES pair mapping	CH271-154L06,Inversion_wrongorientation	chr20:11249437-11432316

## Sheet: Supplemental_Table_S8
Supplemental Table S8. List of genes inside inversions.
Inversion	Genes* inside inversions	Gibbon-specific inv (y/n)
chr1_inv1	LOC105376806	y
	MFAP2	y
	LOC124903861	y
	ATP13A2	y
	CROCC	y
	PADI2	y
	SDHB	y
chr1_inv2	CYP4A11	n
	CYP4X1	n
	LOC124904172	n
	CYP4Z1	n
chr1_inv4	LINC01755	y
	LINC01753	y
chr1_inv7	GBP3	y
	LOC105378841	y
chr1_inv8	RNPC3-DT	y
chr1_inv10	LOC105371670	n
	LOC107985242	n
chr1_inv13	ERO1B	y
chr1_inv14	LOC105373220	y
chr1_inv15	OR2M3	n
	OR2M4	n
chr10_inv1	AKR1C3	n
	LOC107984198	n
chr10_inv2	PRKCQ	n
chr10_inv3	LOC107984203	n
	LINC00707	n
chr10_inv4	LINC02665	y
	LOC105376387	y
chr10_inv5	MIR548AK	y
	LOC124902579	y
	LOC107984209	y
	MIR4480	y
	MIR4481	y
	MIR548Q	y
	LOC124902377	y
	BEND7-DT	y
	LOC124902379	y
	LOC101928453	y
	LOC124902378	y
	MIR4293	y
	MIR1265	y
	LOC124902380	y
	LOC124902381	y
	LOC105376429	y
	DHTKD1	y
	SEC61A2	y
	CDC123	y
	LOC105376418	y
	MCM10	y
	UCMA	y
	PHYH	y
	SEPHS1	y
	LOC105376419	y
	LOC105376420	y
	LOC105376422	y
	LOC105376426	y
	LOC105376425	y
	CDNF	y
	HSPA14	y
	LOC100421372	y
	LOC124902382	y
	SUV39H2	y
	MEIG1	y
	NUDT5	y
	BEND7	y
	CCDC3	y
	OPTN	y
	FRMD4A	y
	DCLRE1C	y
	CAMK1D	y
	FAM107B	y
	PRPF18	y
chr10_inv6	NSUN6	n
chr10_inv7	SVIL-AS1	n
	SVIL	n
chr10_inv8	MIR604	n
	SVIL	n
chr10_inv9	LOC124902419	n
	GPRIN2	n
chr10_inv11	GDF2	n
	LINC03029	n
	LOC107001062	n
	LOC124902420	n
	FRMPD2B	n
	GDF10	n
	LOC105378291	n
	RBP3	n
	ZNF488	n
	PTPN20	n
chr10_inv10	GDF2	n
	LINC03029	n
	LOC107001062	n
	LOC124902420	n
	FAM25G	n
	CTSLP2	n
	LOC124902422	n
	LOC102724593	n
	LOC124902423	n
	FAM25C	n
	ARHGAP22-IT1	n
	LOC105378299	n
	LOC105378298	n
	MIR4294	n
	FAM170B	n
	LOC124902545	n
	C10orf71-AS1	n
	PGBD3	n
	GDF10	n
	LOC105378291	n
	RBP3	n
	ZNF488	n
	AGAP9	n
	BMS1P2	n
	BMS1P2-AGAP9	n
	LOC124902421	n
	LINC02675	n
	SYT15B	n
	NPY4R2	n
	AGAP12P	n
	LRRC18	n
	FAM170B-AS1	n
	TMEM273	n
	C10orf71	n
	DRGX	n
	ERCC6	n
	CHAT	n
	SLC18A3	n
	C10orf53	n
	OGDHL	n
	PTPN20	n
	ANXA8	n
	LOC102724603	n
	SHLD2P3	n
	ARHGAP22	n
	MAPK8	n
	VSTM4	n
	WDFY4	n
	PARG	n
	FRMPD2	n
chr10_inv12	LOC124902424	n
	SGMS1-AS1	n
	ASAH2	n
	SGMS1	n
chr10_inv13	LOC107984235	y
chr10_inv14	CTNNA3	y
chr10_inv15	CTNNA3	n
chr10_inv16	SFTPA2	n
	LOC124902469	n
	SFTPA1	n
	LOC124900288	n
	BEND3P3	n
	LOC642361	n
	LINC02679	n
	NUTM2B	n
	BMS1P21	n
	MBL1P	n
	NUTM2E	n
	TMEM254-AS1	n
	ANXA11	n
	PLAC9	n
	LINC00857	n
	SFTPD	n
	TMEM254	n
	NUTM2B-AS1	n
chr11_inv1	MUC5AC	y
chr11_inv2	LINC02718	y
chr11_inv3	LINC02760	y
chr11_inv4	C11orf94	y
	LOC124902668	y
	PEX16	y
	SLC35C1	y
	MAPK8IP1	y
	CRY2	y
chr11_inv6	LOC105369310	y
chr11_inv7	LOC124902711	y
	RAB6A	y
	MRPL48	y
chr11_inv9	LOC105369469	y
	LOC105369468	y
chr11_inv10	OPCML	n
chr11_inv11	JAM3	n
chr12_inv3	LOC107984476	y
	LOC124902911	y
	LOC124902910	y
	TSPAN11	y
chr12_inv5	LOC105369911	y
	LOC105369913	y
	LOC105369912	y
chr12_inv7	C12orf75-AS1	n
chr12_inv8	LOC107984447	y
chr13_inv1	LOC107984610	n
	LOC107987187	n
	ATP12A	n
	LOC105370118	n
	CENPJ	n
	RNF17	n
chr13_inv3	LOC124903154	y
chr13_inv4	SLC25A30-AS1	n
	SLC25A30	n
	TPT1-AS1	n
chr13_inv5	LOC105370207	n
	THSD1	n
	CKAP2	n
	VPS36	n
chr13_inv8	LOC105370235	n
	LINC00395	n
chr13_inv9	LOC124903242	y
chr13_inv10	MIR4501	y
	LOC124903195	y
	LOC124903264	y
	LOC124903196	y
	LOC105370325	y
	LINC00359	y
	LINC00456	y
	LOC107984573	y
	LOC124903197	y
	RAP2A	y
	LOC101927385	y
	MBNL2	y
	OXGR1	y
	LOC105370324	y
	HS6ST3	y
chr14_inv2	OR4Q2	n
	OR4K14	n
	OR4K13	n
	OR4L1	n
	OR4K17	n
chr14_inv1	OR11G2	y
	OR11H6	y
	OR11H7	y
	OR11H4	y
	SNORA79B	y
	SNORD126	y
	RPPH1	y
	APEX1	y
	PIP4P1	y
	PNP	y
	RNASE9	y
	RNASE11	y
	RNASE12	y
	LOC124903280	y
	OR6S1	y
	EGILA	y
	LOC124903282	y
	EDDM3B	y
	RNASE6	y
	RNASE1	y
	LOC124903279	y
	TTC5	y
	KLHL33	y
	PARP2	y
	TEP1	y
	RNASE10	y
	ANG	y
	LOC124903281	y
	RNASE11-AS1	y
	RNASE4	y
	EDDM3A	y
	LOC105370397	y
	LOC107984671	y
	CCNB1IP1	y
	OSGEP	y
chr14_inv3	LOC100507513	y
chr14_inv7	LINC02307	y
chr14_inv9	SLC38A6	n
chr15_inv1	NIPA2	n
	TUBGCP5	n
	CYFIP1	n
	NIPA1	n
chr15_inv2	MIR4508	n
	MKRN3	n
	LOC124903576	n
	MAGEL2	n
	NDN	n
	LOC124903577	n
	LOC124903447	n
	LOC102723749	n
	NPAP1	n
	LOC124903612	n
	PWARSN	n
	SNORD107	n
	SNORD64	n
	SNORD108	n
	SNORD109A	n
	SNORD116-1	n
	SNORD116-2	n
	SNORD116-3	n
	SNORD116-4	n
	SNORD116-5	n
	SNORD116-6	n
	SNORD116-10	n
	SNORD116-11	n
	SNORD116-12	n
	SNORD116-13	n
	SNORD116-14	n
	SNORD116-15	n
	SNORD116-16	n
	SNORD116-17	n
	SNORD116-7	n
	SNORD116-8	n
	SNORD116-9	n
	SNORD116-18	n
	SNORD116-19	n
	SNORD116-20	n
	SNORD116-21	n
	SNORD116-22	n
	SNORD116-23	n
	SNORD116-24	n
	SNORD116-25	n
	SNORD116-26	n
	SNORD116-27	n
	SNORD116-28	n
	SNORD116-29	n
	SNORD116-30	n
	PWAR1	n
	SNORD115-1	n
	SNORD115-2	n
	SNORD115-3	n
	SNORD115-4	n
	SNORD115-5	n
	SNORD115-6	n
	SNORD115-10	n
	SNORD115-11	n
	SNORD115-12	n
	SNORD115-13	n
	SNORD115-14	n
	SNORD115-15	n
	SNORD115-7	n
	SNORD115-8	n
	SNORD115-9	n
	PWAR4	n
	SNORD115-16	n
	SNORD115-17	n
	SNORD115-18	n
	SNORD115-19	n
	SNORD115-20	n
	SNORD115-21	n
	SNORD115-22	n
	SNORD115-23	n
	SNORD115-24	n
	SNORD115-25	n
	SNORD115-26	n
	SNORD115-27	n
	SNORD115-28	n
	SNORD115-29	n
	SNORD115-30	n
	SNORD115-31	n
	SNORD115-32	n
	SNORD115-33	n
	SNORD115-34	n
	SNORD115-35	n
	SNORD115-36	n
	SNORD115-37	n
	SNORD115-38	n
	SNORD115-39	n
	SNORD115-40	n
	SNORD115-41	n
	SNORD115-42	n
	SNORD115-43	n
	SNORD115-44	n
	SNORD109B	n
	SNORD115-45	n
	SNORD115-46	n
	SNORD115-47	n
	SNORD115-48	n
	LOC107984770	n
	MIR4715	n
	LOC124900363	n
	LOC124903578	n
	GABRG3-AS1	n
	LOC645202	n
	GOLGA8F	n
	MIR4509-2	n
	MIR4509-3	n
	HERC2P11	n
	LOC100289656	n
	GOLGA6L7	n
	NSMCE3	n
	LOC100130111	n
	LOC105370743	n
	LOC124903451	n
	GOLGA8J	n
	LOC124900359	n
	LOC105370747	n
	LOC105370751	n
	LOC124900357	n
	LOC124903452	n
	DNM1P50	n
	LOC124900358	n
	LOC124903453	n
	MIR211	n
	LINC02352	n
	LOC124903454	n
	LOC105370939	n
	LOC124900362	n
	LOC124903441	n
	LOC105370729	n
	LOC107984787	n
	LOC105370732	n
	PWRN2	n
	PWRN3	n
	PWRN1	n
	PWAR5	n
	SNURF	n
	IPW	n
	LOC124903448	n
	ATP10A-DT	n
	LINC00929	n
	LOC105370739	n
	LOC124903568	n
	LOC112268151	n
	LOC107984766	n
	LOC124903449	n
	GOLGA8G	n
	LOC100132202	n
	LOC101059997	n
	HERC2P9	n
	LOC124903450	n
	WHAMMP2	n
	ULK4P3	n
	LINC02249	n
	LOC105370746	n
	CHRFAM7A	n
	LOC105376704	n
	WHAMMP4	n
	ARHGAP11B	n
	ARHGAP11B-DT	n
	GOLGA8H	n
	GOLGA8Q	n
	ULK4P2	n
	HERC2P10	n
	LOC105370752	n
	LINC03034	n
	KLF13	n
	LOC105370753	n
	LOC124903455	n
	PWRN4	n
	LOC102725165	n
	LOC105370733	n
	PWAR6	n
	SNRPN	n
	ATP10A	n
	LINC02250	n
	LINC02346	n
	LOC107984789	n
	UBE3A	n
	GABRA5	n
	GABRB3	n
	LINC02248	n
	LOC105370740	n
	OCA2	n
	APBA2	n
	GOLGA8M	n
	LOC107984746	n
	PDCD6IPP2	n
	GOLGA8T	n
	TJP1	n
	FAN1	n
	LOC100288637	n
	LOC101930434	n
	MTMR10	n
	TRPM1	n
	CHRNA7	n
	OTUD7A	n
	FAM189A1	n
	GABRG3	n
	GOLGA8R	n
	HERC2	n
	LOC101927788	n
	SNHG14	n
chr15_inv4	FAM81A	y
chr15_inv5	LOC105370919	y
chr15_inv6	RPS17	n
	LOC338963	n
	SCARNA15	n
	RAMAC	n
	MIR4515	n
	LOC105370933	n
	LOC105370934	n
	CPEB1-AS1	n
	ACTG1P17	n
	FSD2	n
	SNHG21	n
	WHAMM	n
	LOC105370928	n
	BTBD1	n
	C15orf40	n
	LOC124903542	n
	HDGFL3	n
	TM6SF1	n
	BNC1	n
	LOC105370932	n
	LOC105370935	n
	AP3B2	n
	CPEB1	n
	HOMER2	n
	LOC124903543	n
	SH3GL3	n
	ADAMTSL3	n
chr15_inv7	LOC124903545	n
	LOC105370947	n
	NMB	n
	SCAND2P	n
	WDR73	n
	ZSCAN2	n
	ALPK3	n
	SEC11A	n
	ZNF592	n
	PDE8A	n
	SLC28A1	n
chr15_inv8	SPATA41	y
	LOC102723335	y
	LOC440313	y
	LOC124903575	y
	LOC124903564	y
	LOC124903565	y
	LOC107984727	y
	SELENOS	y
	LOC100507472	y
	LOC107987228	y
	LOC124903567	y
	LOC105371021	y
	ASB7	y
	LINS1	y
	PRKXP1	y
	ALDH1A3	y
	ALDH1A3-AS1	y
	GCAWKR	y
	SNRPA1	y
	SNRPA1-DT	y
	PCSK6-AS1	y
	LOC124903566	y
	ADAMTS17	y
	CERS3	y
	CERS3-AS1	y
	CHSY1	y
	LOC105371024	y
	LOC105371026	y
	LRRK1	y
	PCSK6	y
chr16_inv2	SNORA3C	y
	ZG16B	y
	LOC124903628	y
	PRSS30P	y
	PRSS22	y
	LOC101929566	y
	PRSS21	y
	PRSS41	y
chr16_inv3	LOC124903652	n
	LOC124903654	n
	LOC124903653	n
	LOC102723692	n
	LOC105371106	n
	LOC107987234	n
	XYLT1	n
	LOC107984893	n
chr16_inv4	LOC124903663	n
	LOC101927814	n
	IGSF6	n
	METTL9	n
	OTOA	n
chr16_inv5	LOC105371129	n
	LOC124903664	n
	CDR2-DT	n
	PDZD9	n
	UQCRC2	n
	LOC124903665	n
	LOC124903666	n
	SDR42E2	n
	CDR2	n
	MFSD13B	n
	POLR3E	n
	EEF2K	n
	VWA3A	n
	MOSMO	n
chr16_inv6	MIR4721	n
	TUFM	n
	ATP2A1-AS1	n
	MIR4517	n
	LAT	n
	LOC124903672	n
	ATP2A1	n
	CD19	n
	RABEP2	n
	SH2B1	n
	SPNS1	n
	ATXN2L	n
	NFATC2IP	n
chr16_inv7	SPN	n
	C16orf54	n
	LOC124903673	n
	LOC124903675	n
	ZG16	n
	LOC105371167	n
	LOC112268170	n
	MAZ	n
	PRRT2	n
	CDIPT	n
	KCTD13-DT	n
	LOC124903762	n
	HIRIP3	n
	C16orf92	n
	TBX6	n
	YPEL3	n
	GDPD3	n
	MAPK3	n
	CORO1A	n
	LOC124903763	n
	QPRT	n
	CDIPTOSP	n
	KIF22	n
	MVP	n
	PAGR1	n
	ASPHD1	n
	INO80E	n
	KCTD13	n
	TAOK2	n
	TMEM219	n
	ALDOA	n
	LOC112694756	n
	PPP4C	n
	TLCD3B	n
	YPEL3-DT	n
	DOC2A	n
	SEZ6L2	n
chr16_inv8	LOC107983990	y
	CLUHP3	y
	KRBOX5	y
chr16_inv9	SNORD148	y
	LOC124903684	y
	LOC124903806	y
	LOC105371236	y
	LOC124903685	y
	LINC02134	y
	MYLK3	y
	C16orf87	y
	DNAJA2	y
	ITFG1-AS1	y
	NETO2	y
	LINC02133	y
	LINC02192	y
	LOC105371237	y
	LOC124903686	y
	GPT2	y
	ABCC12	y
	LOC101927080	y
	PHKB	y
	ITFG1	y
chr16_inv10	MPHOSPH10P1	y
	LOC102723373	y
chr16_inv11	EXOSC6	n
	LOC124903708	n
	SNORD111B	n
	SNORD111	n
	LOC102725168	n
	LOC124903710	n
	TAT	n
	LOC124903711	n
	SNORA70D	n
	SNORD71	n
	LOC124903713	n
	ATXN1L	n
	LOC124903719	n
	HCCAT5	n
	LOC102723876	n
	LOC105371342	n
	LOC124903721	n
	LOC124903722	n
	DDX19A	n
	DDX19A-DT	n
	DDX19B	n
	FCSK	n
	LOC124903707	n
	SF3B3	n
	MTSS2	n
	VAC14-AS1	n
	CMTR2	n
	CALB2	n
	LINC02136	n
	LOC105371332	n
	CHST4	n
	LOC105371335	n
	LOC124903709	n
	ZNF19	n
	ZNF23	n
	LOC105371334	n
	MARVELD3	n
	AP1G1	n
	LOC124903714	n
	IST1	n
	ZNF821	n
	DHODH	n
	HP	n
	HPR	n
	DHX38	n
	LOC105371341	n
	LOC124903720	n
	LOC124903716	n
	LOC124903717	n
	LOC107984856	n
	PSMD7	n
	PSMD7-DT	n
	COG4	n
	HYDIN	n
	IL34	n
	ST3GAL2	n
	VAC14	n
	LOC124903712	n
	PHLPP2	n
	PKD1L3	n
	PMFBP1	n
	TAT-AS1	n
	TLE7	n
	TXNL4B	n
	LOC124903715	n
	LOC124903718	n
	ZFHX3-AS1	n
	AARS1	n
	LINC01568	n
	LINC01572	n
	LOC102723786	n
	ZFHX3	n
chr16_inv12	CTRB2	n
	CTRB1	n
chr17_inv1	LOC100288728	n
chr17_inv2	CDRT15	n
chr17_inv3	LOC105371547	y
	MIR4731	y
	LOC124903931	y
	CDRT3	y
	LOC124903932	y
	PMP22	y
	TVP23C	y
	CDRT4	y
	TEKT3	y
	TVP23C-CDRT4	y
chr17_inv4	SNORD163	n
	MIR1288	n
	LOC124903937	n
	UBB	n
	SNORD49A	n
	SNORD49B	n
	SNORD65	n
	LOC124903940	n
	LOC105371554	n
	LOC124903941	n
	TTC19	n
	CENPV	n
	LOC124903936	n
	LRRC75A	n
	SNHG29	n
	TRPV2	n
	ZNF287	n
	LOC124903934	n
	ADORA2B	n
	NCOR1	n
	PIGL	n
	ZNF624	n
	ZSWIM7	n
chr17_inv5	LINC02090	n
	LOC284191	n
	RASD1	n
	SMCR2	n
	SMCR5	n
	MIR33B	n
	MIR6777	n
	LOC105371566	n
	LOC124903944	n
	LOC124904129	n
	MIEF2	n
	MIR6778	n
	TBC1D27P	n
	TNFRSF13B	n
	COPS3	n
	FLCN	n
	PLD6	n
	NT5M	n
	MED9	n
	LOC124903942	n
	LOC124903943	n
	RAI1-AS1	n
	ATPAF2	n
	DRC3	n
	GID4	n
	LOC107984989	n
	ALKBH5	n
	DRG2	n
	LOC105371567	n
	MYO15A	n
	FLII	n
	LLGL1	n
	SMCR8	n
	TOP3A	n
	LOC124903938	n
	MPRIP	n
	PEMT	n
	RAI1	n
	SHMT1	n
	TOM1L2	n
	SREBF1	n
chr17_inv6	PRPSAP2	y
chr17_inv7	SNORA59B	y
	SLC47A1P2	y
	LOC124903948	y
	LOC105371578	y
	SLC47A1	y
	ALDH3A1	y
	SLC47A2	y
	ALDH3A2	y
chr17_inv8	LOC124903978	y
	SH3GL1P2	y
	DPRXP4	y
	SMURF2P1-LRRC37BP1	y
	SUZ12P1	y
	ATAD5	y
	TEFM	y
	RNF135	y
	ADAP2	y
	CRLF3	y
	LOC105371723	y
chr17_inv9	LOC124903978	n
	SH3GL1P2	n
	DPRXP4	n
	LOC105371722	n
	LOC124903974	n
	MIR4733	n
	LOC101927057	n
	OMG	n
	EVI2A	n
	LOC124903977	n
	LOC105371725	n
	MIR4724	n
	MIR193A	n
	MIR365B	n
	MIR4725	n
	LOC124903975	n
	COPRS	n
	SMURF2P1-LRRC37BP1	n
	SUZ12P1	n
	ATAD5	n
	TEFM	n
	LOC107984974	n
	LOC646030	n
	RNF135	n
	EVI2B	n
	UTP6	n
	ADAP2	n
	CRLF3	n
	LOC105371723	n
	NF1	n
	RAB11FIP4	n
chr17_inv10	LOC105371933	y
	PEX12	y
	SNORD7	y
	C17orf50	y
	CCL5	y
	LRRC37A8P	y
	LYZL6	y
	CCL14	y
	CCL15	y
	CCL23	y
	LOC105371746	y
	CCL18	y
	CCL3	y
	CCL4	y
	LOC107985055	y
	LOC105371932	y
	SLFN11	y
	SLFN12	y
	SLFN13	y
	LOC107985033	y
	SLFN14	y
	SNHG30	y
	GAS2L2	y
	RASL10B	y
	HEATR9	y
	LOC105371745	y
	TAF15	y
	CCL15-CCL14	y
	CCL16	y
	LOC107985068	y
	RDM1	y
	LOC101927369	y
	SLFN12L	y
	SLFN5	y
	MMP28	y
	AP2B1	y
chr17_inv11	LOC105371749	n
	DHRS11	n
	LOC107985031	n
	LOC105371751	n
	LHX1	n
	MIR2909	n
	LOC105371753	n
	SNORA90	n
	MIR378J	n
	LOC124903989	n
	MYO19	n
	PIGW	n
	ZNHIT3	n
	MRM1	n
	LHX1-DT	n
	C17orf78	n
	TADA2A	n
	DUSP14	n
	SYNRG	n
	HNF1B	n
	LOC105371754	n
	LOC105371756	n
	GGNBP2	n
	AATF	n
	ACACA	n
	DDX52	n
	LOC105371750	n
chr17_inv12	LOC101929777	n
	LINC01974	n
	LOC112268191	n
	MIR5089	n
	RPRML	n
	WNT9B	n
	GOSR2	n
	LOC101927060	n
	LRRC37A2	n
	NSF	n
	WNT3	n
chr17_inv13	MIR21	y
	RNFT1	y
	DHX40	y
	PTRH2	y
	TUBD1	y
	RNFT1-DT	y
	TBC1D3P1-DHX40P1	y
	CLTC	y
	RPS6KB1	y
	VMP1	y
chr17_inv14	LOC105371891	y
	LOC107985078	y
	DNAI2	y
	KIF19	y
chr17_inv15	USH1G	y
	OTOP2	y
	LOC124904058	y
	MRPL58	y
	ATP5PD	y
	NT5C	y
	MRPS7	y
	MIF4GD-DT	y
	LOC124904059	y
	LOC124904060	y
	MIR3678	y
	MIR6785	y
	TSEN54	y
	SMIM5	y
	LOC107985013	y
	SMIM6	y
	H3-3B	y
	MIR4738	y
	WBP2	y
	MRPL38	y
	LOC124904061	y
	GALR2	y
	ZACN	y
	MIR6868	y
	LOC101928447	y
	LOC124904120	y
	SPHK1	y
	SNORD1A	y
	SNORD1B	y
	SNORD1C	y
	LOC122455342	y
	LOC105274304	y
	MIR636	y
	SRSF2	y
	LINC02080	y
	MIR6516	y
	SCARNA16	y
	SNHG20	y
	FADS6	y
	HID1	y
	OTOP3	y
	CDR2L	y
	KCTD2	y
	ARMC7	y
	JPT1	y
	LOC107985034	y
	SUMO2	y
	MIF4GD	y
	SLC25A19	y
	CASKIN2	y
	LLGL2	y
	MYO15B	y
	ITGB4	y
	SAP30BP	y
	TRIM47	y
	UNC13D	y
	UNK	y
	ACOX1	y
	CDK3	y
	FBF1	y
	TEN1	y
	TEN1-CDK3	y
	EXOC7	y
	FOXJ1	y
	SRP68	y
	LOC105371896	y
	UBALD2	y
	PRPSAP1	y
	AANAT	y
	PRCD	y
	RHBDF2	y
	SNHG16	y
	ST6GALNAC1	y
	ST6GALNAC2	y
	JMJD6	y
	METTL23	y
	MFSD11	y
	LINC00868	y
	LOC107985089	y
	LOC105371899	y
	LOC105371901	y
	GGA3	y
	GRB2	y
	HID1-AS1	y
	NUP85	y
	SLC16A5	y
	EVPL	y
	GALK1	y
	QRICH2	y
	RECQL5	y
	RNF157	y
	RNF157-AS1	y
	TRIM65	y
	UBE2O	y
	MGAT5B	y
	MXRA7	y
	SEC14L1	y
	CYGB	y
	TMEM94	y
chr17_inv16	UTS2R	y
	LOC124904092	y
	LOC124904090	y
	HEXD-IT1	y
	NARF-AS2	y
	LOC105371942	y
	MIR4525	y
	LOC124904093	y
	LOC101929552	y
	LOC124904095	y
	LOC124904094	y
	LOC124904105	y
	HEXD	y
	LOC124904091	y
	OGFOD3	y
	SECTM1	y
	TEX19	y
	NARF	y
	RAB40B	y
	WDR45B	y
	FN3K	y
	FN3KRP	y
	LOC124904096	y
	METRNL	y
	LOC101929650	y
	LOC101930496	y
	LOC105371948	y
	CYBC1	y
	FOXK2	y
	B3GNTL1	y
	TBCD	y
	ZNF750	y
chr18_inv1	L3MBTL4	y
chr18_inv2	MIR6788	n
	LOC105371993	n
	LOC105371995	n
	LINC01928	n
	SLC35G4	n
	MIR7153	n
	CHMP1B	n
	LOC124904251	n
	LOC101927410	n
	LINC01255	n
	LOC124904252	n
	MPPE1	n
	IMPA2	n
	LOC107985173	n
	LOC124904249	n
	LOC124904250	n
	PIEZO2	n
	GNAL	n
	LOC101927511	n
chr18_inv5	LOC107985134	y
chr19_inv1	ZNF420	n
chr19_inv2	LGALS13	n
	LOC100129935	n
	LGALS16	n
	LGALS17A	n
chr19_inv3	LOC124904745	n
	SIGLEC11	n
	SIGLEC16	n
chr2_inv2	LOC124905968	y
	LOC105373390	y
	LINC01250	y
chr2_inv3	LINC01460	y
	MRPL33	y
	LOC105374378	y
chr2_inv4	COMMD1	y
chr2_inv6	LOC105374854	n
	LOC124907856	n
chr2_inv7	LINC01594	n
chr2_inv8	CCDC138	y
	EDAR	y
	RANBP2	y
chr2_inv9	MTLN	y
	LOC124906059	y
	MIR4436B2	y
	LOC124906060	y
	LOC107985776	y
	LOC124906061	y
	LOC105373552	y
	LOC105373553	y
	SNORD132	y
	LOC124906064	y
	LOC124907866	y
	MIR4435-2	y
	LOC124906065	y
	LOC124906066	y
	LOC107985933	y
	NPHP1	y
	LOC100507334	y
	LOC105373551	y
	LOC105375809	y
	LINC01106	y
	LOC100288570	y
	LOC124906063	y
	LOC102724875	y
	RGPD6	y
	BUB1	y
	LOC105373554	y
	ACOXL-AS1	y
	LOC124907867	y
	LOC124907868	y
	SOCAR	y
	LOC105373559	y
	ACOXL	y
	LIMS4	y
	LOC101927283	y
	MIR4435-2HG	y
	BCL2L11	y
	MALL	y
chr2_inv10	CCDC74B	n
	TUBA3E	n
	CCDC115	n
	IMP4	n
	LOC105373618	n
	MZT2B	n
	PTPN18	n
	SMPD4	n
chr2_inv11	PKP4-AS1	n
chr2_inv12	SCHLAP1	n
chr2_inv13	SCHLAP1	y
chr2_inv16	SPAG16-DT	y
	MIR4438	y
	LOC124907973	y
	SNORA70I	y
	LOC124907974	y
	LINC02862	y
	LOC124906184	y
	LOC124907975	y
	FN1-DT	y
	LOC102724849	y
	LINC01614	y
	LOC107985982	y
	LOC105373870	y
	LOC107985984	y
	RPL37A	y
	LOC101928156	y
	LOC124907976	y
	LOC124907977	y
	LOC124900515	y
	LOC124907978	y
	LOC124907979	y
	LINC01921	y
	LOC105373876	y
	LOC124906118	y
	TNP1	y
	LOC105373873	y
	LOC124907981	y
	SNORA115	y
	MIR6809	y
	LOC124905960	y
	LOC124907982	y
	CXCR2P1	y
	CXCR1	y
	LOC124906159	y
	LOC101928487	y
	GPBAR1	y
	MIR6513	y
	LOC124906179	y
	MIR6810	y
	CATIP-AS1	y
	MIR26B	y
	RNF25	y
	MIR9500	y
	LOC105373882	y
	LOC124906119	y
	CDK5R2	y
	FEV	y
	LINC00608	y
	CRYBA2	y
	MIR375	y
	LOC107985987	y
	IHH	y
	LOC124906120	y
	MIR3131	y
	CNPPD1	y
	ZFAND2B	y
	ATG9A	y
	GLB1L	y
	STK16	y
	MIR153-1	y
	LOC107985835	y
	DES	y
	GMPPA	y
	CHPF	y
	MIR3132	y
	INHA	y
	SLC4A3	y
	DNAJB6P3	y
	LOC105373888	y
	LINC01803	y
	MIR4268	y
	CCDC140	y
	LOC105373902	y
	LOC124906151	y
	ACSL3-AS1	y
	KCNE4	y
	LOC105373905	y
	LOC105373906	y
	LOC124907987	y
	SCG2	y
	LOC124907989	y
	LOC124907991	y
	LOC105373908	y
	LOC124906121	y
	MIR4439	y
	MIR5702	y
	LOC124900533	y
	LOC124907993	y
	SCYGR1	y
	LOC124907994	y
	MIR5703	y
	SCYGR2	y
	LOC729968	y
	SCYGR10	y
	SCYGR3	y
	SCYGR4	y
	SCYGR5	y
	SCYGR6	y
	SCYGR7	y
	SCYGR8	y
	CCL20	y
	LOC124907995	y
	LOC105373923	y
	LOC124906135	y
	LOC105373924	y
	LOC105373925	y
	LINC01907	y
	LINC01953	y
	LOC105373864	y
	LOC107985981	y
	LOC101928084	y
	VWC2L-IT1	y
	BARD1	y
	LOC124906117	y
	FN1	y
	PECR	y
	TMEM169	y
	LINC01963	y
	LOC107985983	y
	RPL37A-DT	y
	SMARCAL1	y
	LINC01280	y
	LOC101928180	y
	LOC105373871	y
	IGFBP5	y
	LOC105373874	y
	LOC124907980	y
	LOC105373872	y
	RUFY4	y
	TNS1-AS1	y
	CXCR2	y
	AAMP	y
	CATIP-AS2	y
	LOC105373880	y
	LOC105373881	y
	PNKD	y
	TMBIM1	y
	CTDSP1	y
	SLC11A1	y
	VIL1	y
	CNOT9	y
	BCS1L	y
	LOC124907983	y
	STK36	y
	ZNF142	y
	CYP27A1	y
	PRKAG3	y
	WNT6	y
	LINC01494	y
	LOC100129175	y
	LOC124907984	y
	ABCB6	y
	ANKZF1	y
	RETREG2	y
	SLC23A3	y
	TUBA4A	y
	TUBA4B	y
	DNPEP	y
	DNPEP-AS1	y
	LOC105373883	y
	PTPRN	y
	RESP18	y
	ASIC4	y
	ASIC4-AS1	y
	SPEG	y
	SPEGNB	y
	LOC124908064	y
	OBSL1	y
	STK11IP	y
	LOC105373887	y
	LOC105373891	y
	LOC105373894	y
	LOC105373896	y
	LOC105373897	y
	LOC105373898	y
	LOC105373900	y
	LOC107985991	y
	CT75	y
	LOC122319436	y
	FARSB	y
	LOC124907985	y
	LOC105373903	y
	ACSL3	y
	LOC105373907	y
	AP1S3	y
	LOC124907988	y
	MRPL44	y
	WDFY1	y
	LOC124907990	y
	LOC124907992	y
	CCDC195	y
	LOC105373910	y
	LOC105373911	y
	LOC646736	y
	LOC105373915	y
	MFF	y
	TM4SF20	y
	C2orf83	y
	SLC19A3	y
	DAW1	y
	LOC105373918	y
	LOC107985993	y
	LOC107985994	y
	FBXO36	y
	LOC107985995	y
	SLC16A14	y
	SP110	y
	SP140L	y
	LOC101928816	y
	LOC112268431	y
	LOC124907996	y
	IKZF2	y
	VWC2L	y
	ATIC	y
	LINC00607	y
	LOC102724861	y
	IGFBP2	y
	MARCHF4	y
	SMARCAL1-AS1	y
	XRCC5	y
	DIRC3	y
	DIRC3-AS1	y
	TNS1	y
	ARPC2	y
	CATIP	y
	CFAP65	y
	PLCD4	y
	TTLL4	y
	USP37	y
	WNT10A	y
	DNAJB2	y
	LOC105373890	y
	TMEM198	y
	LOC105373895	y
	LOC107985990	y
	EPHA4	y
	LOC105373899	y
	LOC124907986	y
	MOGAT1	y
	SGPP2	y
	SERPINE2	y
	CUL3	y
	DOCK10	y
	LOC105373909	y
	LOC105373914	y
	LOC107985992	y
	COL4A3	y
	COL4A4	y
	IRS1	y
	MFF-DT	y
	RHBDD1	y
	SPHKAP	y
	PID1	y
	LOC107985996	y
	SP100	y
	SP140	y
	TRIP12	y
	CAB39	y
	ABCA12	y
	IGFBP-AS1	y
	MREG	y
	SNHG31	y
	SPAG16	y
	FAM124B	y
	LOC105373893	y
	NHEJ1	y
	NYAP2	y
	PAX3	y
	AGFG1	y
	DNER	y
	LINC01807	y
	LOC105373921	y
chr20_inv1	LOC105372529	y
chr22_inv1	DGCR11	n
	LOC124905078	n
	TSSK2	n
	GSC2	n
	LINC01311	n
	SLC25A1	n
	LOC112268289	n
	LOC124900485	n
	C22orf39	n
	MRPL40	n
	CLDN5	n
	LINC00895	n
	GP1BB	n
	SEPT5-GP1BB	n
	SEPTIN5	n
	LOC105372861	n
	RTL10	n
	LOC124905081	n
	MIR4761	n
	LOC124905082	n
	MIR185	n
	MIR1306	n
	MIR3618	n
	MIR6816	n
	TRMT2A	n
	SNORA77B	n
	CCDC188	n
	LINC00896	n
	LOC105372862	n
	MIR1286	n
	LOC124905153	n
	LOC107985588	n
	LOC124905084	n
	DGCR2	n
	LOC105372859	n
	CDC45	n
	UFD1	n
	LOC124905079	n
	TBX1	n
	LOC124905080	n
	ARVCF	n
	COMT	n
	DGCR8	n
	RANBP1	n
	ZDHHC8	n
	LINC02891	n
	LOC105372863	n
	LOC124905083	n
	RTN4R	n
	FAM230G	n
	SCARF2	n
	ZNF74	n
	LOC101928824	n
	LOC124905085	n
	CLTCL1	n
	ESS2	n
	GNB1L	n
	HIRA	n
	LOC112268297	n
	DGCR6L	n
	KLHL22	n
	MED15	n
	TANGO2	n
	TXNRD2	n
chr22_inv2	CCDC116	n
	YDJC	n
	MIR130B	n
	MIR301B	n
	PPM1F-AS1	n
	LOC102724653	n
	VPREB1	n
	LOC105372952	n
	LOC101929255	n
	ZNF280A	n
	PRAME	n
	GGTLC2	n
	LOC112267890	n
	MIR650	n
	LOC124905086	n
	LOC102724638	n
	MIR5571	n
	LOC124905170	n
	FBXW4P1	n
	LOC107985554	n
	UBE2L3	n
	LOC107985532	n
	PPIL2	n
	SDF2L1	n
	YPEL1	n
	MAPK1	n
	PPM1F	n
	TOP3B	n
	LOC124905087	n
	BMS1P20	n
	ZNF280B	n
	LL22NC03-63E9.3	n
	POM121L1P	n
	LL22NC03-102D1.18	n
	IGLL5	n
	LOC105372947	n
	LOC105372948	n
	GNAZ	n
	RAB36	n
	BCR	n
	PRAMENP	n
	RSPH14	n
chr22_inv3	LOC102724653	n
chr22_inv5	LOC124905091	y
	ADORA2A	y
	ADORA2A-AS1	y
	LOC105372960	y
	GGT1	y
	GUCD1	y
	LRRC75B	y
	SNRPD3	y
	SPECC1L	y
	SPECC1L-ADORA2A	y
	UPB1	y
chr22_inv6	MIR6818	y
	LIF-AS1	y
	LIF-AS2	y
	OSM	y
	CASTOR1	y
	RNF215	y
	LOC105372990	y
	MTFP1	y
	LOC105372991	y
	LOC107985579	y
	SDC4P	y
	MIR3200	y
	LOC105372994	y
	MORC2-AS1	y
	TUG1	y
	LOC124905100	y
	SELENOM	y
	PLA2G3	y
	MIR3928	y
	PIK3IP1	y
	PIK3IP1-DT	y
	LINC01521	y
	MIR7109	y
	LOC105372998	y
	LOC124905102	y
	YWHAH-AS1	y
	LOC124905158	y
	LOC107985541	y
	NIPSNAP1	y
	THOC5	y
	CABP7	y
	ASCC2	y
	UQCR10	y
	LIF	y
	LOC105372988	y
	CCDC157	y
	KIAA1656	y
	SF3A1	y
	TBC1D10A	y
	SEC14L3	y
	SEC14L4	y
	DUSP18	y
	GAL3ST1	y
	PES1	y
	SLC35E4	y
	TCN2	y
	LOC107985544	y
	INPP5J	y
	LOC105372995	y
	SMTN	y
	LIMK2	y
	LOC105372997	y
	DRG1	y
	PISD	y
	LOC124900477	y
	YWHAH	y
	AP1B1P1	y
	HORMAD2	y
	HORMAD2-AS1	y
	MTMR3	y
	NEFH	y
	NF2	y
	ZMAT5	y
	MORC2	y
	OSBP2	y
	PATZ1	y
	RNF185	y
	SEC14L6	y
	DEPDC5	y
	LINC02558	y
	LOC105373000	y
	PRR14L	y
	SFI1	y
	SLC5A1	y
	EIF4ENIF1	y
	SEC14L2	y
chr22_inv7	RFPL3S	y
	LOC339666	y
	SYN3-AS1	y
	LOC107985545	y
	LOC124905104	y
	LOC107985561	y
	RFPL3	y
	BPIFC	y
	FBXO7	y
	RTCB	y
	LOC124905103	y
	LOC105373002	y
	TIMP3	y
	SLC5A4	y
	SYN3	y
chr3_inv4	LOC124906267	n
chr3_inv5	LINC00901	y
chr3_inv7	COL6A5	n
chr3_inv9	LOC124909477	n
	MIR570	n
	LOC124905352	n
	LOC107984010	n
	MIR6829	n
	TNK2-AS1	n
	LOC124906254	n
	LOC124909479	n
	LOC107986031	n
	TM4SF19-AS1	n
	UBXN7-AS1	n
	LOC105374306	n
	LOC105374307	n
	LINC01063	n
	NCBP2-AS1	n
	NCBP2AS2	n
	LOC124906255	n
	MELTF-AS1	n
	MIR4797	n
	DLG1-AS1	n
	LOC101926923	n
	LOC105374309	n
	MUC20	n
	MUC4	n
	LINC01983	n
	TNK2	n
	LOC124909478	n
	SDHAP1	n
	TFRC	n
	LINC00885	n
	ZDHHC19	n
	DYNLT2B	n
	PCYT1A	n
	SLC51A	n
	TM4SF19	n
	TM4SF19-DYNLT2B	n
	UBXN7	n
	FBXO45	n
	SMCO1	n
	WDR53	n
	CEP19	n
	NRROS	n
	PIGX	n
	PAK2	n
	NCBP2	n
	PIGZ	n
	MELTF	n
	LINC02012	n
	LOC105374308	n
	MIR570HG	n
	LOC105374304	n
	RNF168	n
	SENP5	n
	BDH1	n
	DLG1	n
chr4_inv1	ZNF141	y
	ABCA11P	y
	ZNF721	y
chr4_inv2	STX18-IT1	n
	LOC107986254	n
	SNORD162	n
	MSX1	n
	LOC107986218	n
	CYTL1	n
	LOC107986256	n
	LINC01587	n
	LOC124900166	n
	MIR378D1	n
	MRFAP1	n
	LINC02482	n
	LOC93622	n
	LINC02481	n
	S100P	n
	LOC105378240	n
	MRFAP1L1	n
	CCDC96	n
	LOC105374368	n
	LINC02447	n
	MIR4798	n
	PSAPL1	n
	MIR4274	n
	LOC124900655	n
	LOC389199	n
	LOC124900657	n
	MIR95	n
	LOC105374373	n
	LOC124900658	n
	LOC101928532	n
	LYAR	n
	TMEM128	n
	ZBTB49	n
	LOC112268462	n
	NSG1	n
	LOC101928237	n
	LOC101928279	n
	CRMP1	n
	JAKMIP1-DT	n
	LOC105374365	n
	LOC124900653	n
	MAN2B2	n
	BLOC1S4	n
	LOC105374367	n
	GRPEL1	n
	LOC100129931	n
	TADA2B	n
	LOC105374371	n
	LOC124900654	n
	AFAP1-AS1	n
	LOC124900656	n
	SH3TC1	n
	HTRA3	n
	LINC02517	n
	TRMT44	n
	CPZ	n
	GPR78	n
	LOC124900659	n
	HMX1	n
	LINC01396	n
	LOC101928306	n
	LOC124900165	n
	STX18	n
	STX18-AS1	n
	C4orf50	n
	EVC	n
	EVC2	n
	JAKMIP1	n
	KIAA0232	n
	LOC105374370	n
	PPP2R2C	n
	TBC1D14	n
	ABLIM2	n
	AFAP1	n
	SORCS2	n
	STK32B	n
	WFS1	n
	ACOX3	n
chr5_inv1	BRD9	n
	ZDHHC11	n
chr5_inv3	LOC124900199	y
chr5_inv6	LOC105374695	y
chr5_inv7	LOC124900971	y
	LOC105374746	y
	LOC105374745	y
	ANXA2R-OT1	y
	LOC105374748	y
	FLJ32255	y
chr5_inv10	LOC105379101	n
chr5_inv13	LINC02147	y
chr5_inv14	LOC124901056	n
chr5_inv15	MEIKIN	n
chr5_inv17	LOC643201	n
chr5_inv18	MIR1271	n
	HIGD2A	n
	NOP16	n
	LOC124901142	n
	LOC124901143	n
	MIR4281	n
	SNCB	n
	LOC124901144	n
	LINC01574	n
	PRELID1	n
	RAB24	n
	RGS14	n
	PFN3	n
	DDX41	n
	TMED9	n
	ARL10	n
	CLTB	n
	KIAA1191	n
	FAF2	n
	RNF44	n
	EIF4E1B	n
	GPRIN1	n
	TSPAN17	n
	HK3	n
	LOC124901145	n
	FGFR4	n
	MXD3	n
	F12	n
	GRK6	n
	PRR7	n
	PRR7-AS1	n
	SLC34A1	n
	DOK3	n
	FAM193B	n
	FAM193B-DT	n
	PDLIM7	n
	LOC107986489	n
	LOC202181	n
	CDHR2	n
	SIMC1	n
	UIMC1	n
	UNC5A	n
	ZNF346	n
	B4GALT7	n
	DBN1	n
	LMAN2	n
	NSD1	n
chr5_inv19	LOC105377754	n
	NHP2	n
	GMCL2	n
	LOC112267937	n
	LOC105377757	n
	LOC105377759	n
	LOC107986494	n
	LOC124901149	n
	LOC124901224	n
	LOC100289470	n
	C5orf60	n
	LOC100502572	n
	CBY3	n
	LTC4S	n
	MIR1229	n
	MRNIP-DT	n
	MIR340	n
	LOC124901151	n
	LOC124901152	n
	LOC124901153	n
	LOC124901154	n
	SCGB3A1	n
	LINC02222	n
	OR2Y1	n
	LINC00847	n
	LOC124901155	n
	MIR8089	n
	LINC01962	n
	TRIM7	n
	TRIM7-AS1	n
	TRIM7-AS2	n
	MIR4638	n
	SNORD95	n
	SNORD96A	n
	LOC124901147	n
	HNRNPAB	n
	PHYKPL	n
	RMND5B	n
	LOC124901148	n
	CLK4	n
	MSANTD5	n
	ZNF354A	n
	LOC107986493	n
	ZNF354B	n
	GRM6	n
	ZNF454	n
	ZNF879	n
	ZNF354C	n
	LOC124900195	n
	LOC105377762	n
	HNRNPH1	n
	LOC105377763	n
	RUFY1-AS1	n
	MAML1	n
	MGAT4B	n
	MRNIP	n
	TBC1D9B	n
	LOC124901150	n
	RASGEF1C	n
	GFPT2	n
	MAPK9	n
	LOC102725231	n
	CNOT6	n
	HEIH	n
	MGAT1	n
	ZFP62	n
	BTNL3	n
	BTNL8	n
	BTNL9	n
	OR2V1	n
	OR2V2	n
	RACK1	n
	TRIM41	n
	N4BP3	n
	AACSP1	n
	ZFP2	n
	CANX	n
	RNF130	n
	RUFY1	n
	SQSTM1	n
	FLT4	n
	ADAMTS2	n
	COL23A1	n
chr6_inv2	LOC105375036	y
	BRPF3	y
	BNIP5	y
	BRPF3-AS1	y
	PNPLA1	y
chr6_inv3	LOC101929770	n
chr6_inv6	KHDRBS2	n
chr6_inv7	LOC124901339	y
chr6_inv8	MEI4	y
chr6_inv9	LOC101928842	y
chr6_inv11	LOC105377885	n
chr6_inv16	PRKN	y
chr6_inv17	LOC102724220	y
	LOC102725048	y
	HPAT5	y
	TTLL2	y
	UNC93A	y
chr7_inv1	BRAT1	n
	IQCE	n
	TTYH3	n
	LOC107986760	n
chr7_inv2	TTYH3	y
	LOC107986760	y
chr7_inv3	SNORA80D	n
	ANKRD61	n
	LOC101927325	n
	LOC124901582	n
	AIMP2	n
	CYTH3	n
	FAM220A	n
	RAC1	n
	SAGSIN1	n
	GRID2IP	n
	KDELR2	n
	INTS15	n
	LOC124901583	n
	ZDHHC4	n
	ZNF316	n
	ZNF853	n
	ZNF12	n
	EIF2AK1	n
	USP42	n
	DAGLB	n
chr7_inv4	LOC101928688	n
chr7_inv6	GS1-278J22.2	n
	LOC105375282	n
	LINC01446	n
chr7_inv7	LOC101060341	n
	MRPS17	n
	CCT6A	n
	SNORA15	n
	SNORA22B	n
	CHCHD2	n
	LOC105375288	n
	LOC102723656	n
	ZNF713	n
	PHKG1	n
	PSPH	n
	SUMF2	n
	NUPR2	n
	NIPSNAP2	n
	SEPTIN14	n
chr7_inv8	LOC107986741	n
	LOC124901667	n
	CT66	n
	LOC124901668	n
	LOC107986709	n
	MIR3914-1	n
	MIR3914-2	n
	LINC01372	n
	LOC105375337	n
[truncated: 44 more rows]

## Sheet: Supplemental_Table_S9
Supplemental Table S9. List of genes at inversion BPs.
Inversion	Genes* at inversion BPs	SDs at BPs (y/n)	Gibbon-specific inv (y/n)
chr1_inv1 (BP1)	MIR3675	y	y
	LOC112267871	#N/A
	LOC105376805	#N/A
	RNU1-2	#N/A
	CROCC	#N/A
chr1_inv2 (BP2)	CYP4Z1	y	n
chr1_inv4 (BP1)	LINC01753	n	y
chr1_inv4 (BP2)	LINC01755	n	y
chr1_inv7 (BP2)	GBP1	y	y
chr1_inv8 (BP2)	RNPC3-DT	n	y
chr1_inv13 (BP1)	ERO1B	n	y
chr1_inv15 (BP1)	OR2L1P	y	n
	OR2M1P	#N/A
	OR2M5	#N/A
	OR2M2	#N/A
	OR2L2	#N/A
	OR2L3	#N/A
	OR2L5	#N/A
	OR2L13	#N/A
chr1_inv15 (BP2)	OR2T33	y	n
	OR2M7	#N/A
	OR2T12	#N/A
chr2_inv2 (BP2)	LINC01250	n	y
chr2_inv3 (BP2)	MRPL33	n	y
chr2_inv4 (BP1)	COMMD1	n	y
chr2_inv4 (BP2)	COMMD1	n	y
chr2_inv6 (BP1)	MIR4436A	y	n
	ANKRD36BP2	#N/A
chr2_inv7 (BP1)	LINC01594	n	n
chr2_inv7 (BP2)	LINC01594	n	n
	SULT1C3	#N/A
chr2_inv8 (BP1)	RANBP2	y	y
chr2_inv8 (BP2)	EDAR	n	y
chr2_inv9 (BP1)	LINC01123	y	y
	MIR4267	#N/A
	MIR4436B1	#N/A
	LIMS3	#N/A
	LIMS3-LOC440895	#N/A
	LOC440895	#N/A
	RGPD5	#N/A
	MALL	#N/A
chr2_inv9 (BP2)	MIR4771-2	y	y
	ANAPC1	#N/A
chr2_inv10 (BP1)	RAB6C	y	n
	CCDC74B	#N/A
	LINC02572	#N/A
	LINC01856	#N/A
	PLAC9P1	#N/A
	RAB6C-AS1	#N/A
	FAR2P1	#N/A
	MED15P9	#N/A
	POTEF	#N/A
chr2_inv10 (BP2)	FAR2P2	y	n
	CYP4F62P	#N/A
	CFC1B	#N/A
	CYP4F30P	#N/A
	POTEI	#N/A
	CFC1	#N/A
	POTEJ	#N/A
	PRSS40A	#N/A
	PRSS40B	#N/A
chr2_inv11 (BP1)	PKP4-AS1	n	n
chr2_inv12 (BP1)	SCHLAP1	n	y
chr2_inv12 (BP2)	SCHLAP1	n	y
chr2_inv13 (BP1)	SCHLAP1	n	y
chr2_inv13 (BP2)	SCHLAP1	n	y
chr2_inv16 (BP1)	IKZF2	n	y
chr2_inv16 (BP2)	CAB39	n	y
chr3_inv5 (BP2)	LINC00901	n	y
chr3_inv7 (BP1)	COL6A5	n	n
chr3_inv7 (BP2)	COL6A5	n	n
chr3_inv9 (BP1)	LOC105374297	y	n
	SDHAP2	#N/A
	MIR570HG	#N/A
chr3_inv9 (BP2)	SDHAP4	y	n
chr4_inv1 (BP1)	ZNF141	n	y
chr4_inv1 (BP2)	ABCA11P	n	y
	ZNF721	#N/A
chr4_inv2 (BP1)	FAM86EP	y	n
	TMEM128	#N/A
	OTOP1	#N/A
chr4_inv2 (BP2)	USP17L10	y	n
	USP17L11	#N/A
	USP17L12	#N/A
	USP17L13	#N/A
	USP17L15	#N/A
	USP17L17	#N/A
	USP17L18	#N/A
	USP17L19	#N/A
	USP17L20	#N/A
	USP17L21	#N/A
	USP17L22	#N/A
	USP17L24	#N/A
	USP17L25	#N/A
	USP17L26	#N/A
	USP17L27	#N/A
	USP17L28	#N/A
	USP17L29	#N/A
	USP17L5	#N/A
	USP17L30	#N/A
	USP17L6P	#N/A
	USP17L9P	#N/A
	DEFB131A	#N/A
	MIR548I2	#N/A
	DRD5	#N/A
	FAM90A26	#N/A
chr4_inv11 (BP2)	UGT2B7	y	y
chr5_inv1 (BP1)	ZDHHC11	y	n
chr5_inv1 (BP2)	BRD9	n	n
chr5_inv7 (BP2)	LOC153684	n	y
	ANXA2R	#N/A
	LOC648987	#N/A
chr5_inv10 (BP2)	GUSBP19	y	n
chr5_inv13 (BP1)	LINC02147	n	y
chr5_inv13 (BP2)	LINC02147	n	y
chr5_inv15 (BP1)	MEIKIN	n	n
chr5_inv15 (BP2)	MEIKIN	n	n
chr5_inv17 (BP1)	LOC100996385	y	n
	FAM153B	#N/A
chr5_inv17 (BP2)	SIMC1	n	n
	LOC643201	#N/A
chr5_inv18 (BP1)	SIMC1	y	n
	LOC643201	#N/A
chr5_inv18 (BP2)	LOC105377752	y	n
	LOC100128340	#N/A
	LOC728554	#N/A
	FAM153CP	#N/A
	FAM153A	#N/A
	PROP1	#N/A
chr5_inv19 (BP1)	LOC105377752	y	n
	LOC100128340	#N/A
	LOC728554	#N/A
	FAM153CP	#N/A
	FAM153A	#N/A
	PROP1	#N/A
chr5_inv19 (BP2)	TRIM52-AS1	y	n
	LOC100132062	#N/A
	CTC-338M12.4	#N/A
	TRIM52	#N/A
	OR4F3	#N/A
chr6_inv2 (BP2)	ETV7	n	y
chr6_inv6 (BP1)	KHDRBS2	n	n
chr6_inv6 (BP2)	KHDRBS2	n	n
chr6_inv8 (BP1)	MEI4	n	y
chr6_inv8 (BP2)	MEI4	n	y
chr6_inv16 (BP1)	PRKN	n	y
chr6_inv16 (BP2)	PRKN	n	y
chr6_inv17 (BP1)	HPAT5	y	y
chr6_inv17 (BP2)	TCP10L3	y	y
chr7_inv1 (BP2)	AMZ1	y	n
chr7_inv2 (BP2)	AMZ1	y	n
chr7_inv3 (BP1)	OCM	y	n
	ZNF815P	#N/A
	AIMP2	#N/A
	CCZ1	#N/A
	PMS2	#N/A
	RSPH10B	#N/A
chr7_inv3 (BP2)	PMS2CL	y	n
	RSPH10B2	#N/A
	SPDYE20P	#N/A
	CCZ1B	#N/A
chr7_inv4 (BP1)	LINC00265	y	n
chr7_inv7 (BP1)	FKBP9P1	y	n
chr7_inv8 (BP1)	LINC01372	y	n
	PMS2P4	#N/A
	STAG3L4	#N/A
chr7_inv8 (BP2)	MIR4650-2	y	y
	SBDSP1	#N/A
	SPDYE7P	#N/A
	NSUN5P2	#N/A
	LOC100101148	#N/A
	TRIM74	#N/A
	STAG3L3	#N/A
	SPDYE9	#N/A
	NCF1B	#N/A
	NSUN5	#N/A
	POM121	#N/A
	SPDYE11	#N/A
	SPDYE8	#N/A
	GTF2IP4	#N/A
	TRIM50	#N/A
	PMS2P7	#N/A
	SPDYE10	#N/A
	TYW1B	#N/A
chr7_inv9 (BP1)	MIR4650-2	y	y
	SBDSP1	#N/A
	SPDYE7P	#N/A
	NSUN5P2	#N/A
	LOC100101148	#N/A
	TRIM74	#N/A
	STAG3L3	#N/A
	SPDYE9	#N/A
	NCF1B	#N/A
	NSUN5	#N/A
	POM121	#N/A
	SPDYE11	#N/A
	SPDYE8	#N/A
	GTF2IP4	#N/A
	TRIM50	#N/A
	PMS2P7	#N/A
	SPDYE10	#N/A
	TYW1B	#N/A
chr7_inv9 (BP2)	BAZ1B	y	n
chr7_inv10 (BP1)	CASTOR2	y	n
chr7_inv10 (BP2)	NCF1C	y	n
	GTF2IP1	#N/A
	GTF2IRD2B	#N/A
chr7_inv12 (BP1)	MKRN1	n	y
chr7_inv13 (BP1)	EPHA1-AS1	y	n
	CTAGE15	#N/A
	TCAF2	#N/A
chr7_inv13 (BP2)	CTAGE6	y	n
	TCAF2P1	#N/A
	LOC154761	#N/A
	TCAF1	#N/A
chr8_inv5 (BP1)	CLVS1	n	n
chr8_inv5 (BP2)	CLVS1	n	n
chr9_inv1 (BP2)	DDX58	n	y
chr9_inv8 (BP1)	ANKRD19P	n	y
chr10_inv1 (BP1)	AKR1C3	n	n
chr10_inv1 (BP2)	AKR1C3	y	n
chr10_inv2 (BP1)	PRKCQ	n	n
chr10_inv2 (BP2)	PRKCQ	n	n
chr10_inv3 (BP1)	LINC00707	n	n
chr10_inv3 (BP2)	LINC00707	n	n
chr10_inv5 (BP2)	DCLRE1CP1	y	y
	MEIG1	#N/A
	ACBD7-DCLRE1CP1	#N/A
chr10_inv6 (BP1)	NSUN6	n	n
chr10_inv6 (BP2)	NSUN6	y	n
chr10_inv7 (BP1)	SVIL-AS1	n	n
chr10_inv7 (BP2)	SVIL-AS1	n	n
	SVIL	#N/A
chr10_inv8 (BP1)	SVIL-AS1	y	n
chr10_inv8 (BP1)	SVIL	y	n
chr10_inv8 (BP2)	SVIL	y	n
chr10_inv9 (BP1)	LOC105378577	y	n
	FAM25BP	#N/A
	HNRNPA1P33	#N/A
	AGAP7P	#N/A
	AGAP14P	#N/A
	ANTXRL	#N/A
	ANXA8L1	#N/A
	NPY4R	#N/A
	ANTXRLP1	#N/A
	LINC00842	#N/A
chr10_inv9 (BP2)	LOC101927699	y	n
	SHLD2P1	#N/A
	SYT15	#N/A
	GLUD1P2	#N/A
	AGAP13P	#N/A
	FRMPD2B	#N/A
	BMS1P1	#N/A
	PTPN20	#N/A
chr10_inv10 (BP1)	LOC101927699	n	n
	SHLD2P1	#N/A
	SYT15	#N/A
	GLUD1P2	#N/A
	AGAP13P	#N/A
	FRMPD2B	#N/A
	BMS1P1	#N/A
	PTPN20	#N/A
chr10_inv11 (BP1)	LOC101927699	y	n
	SHLD2P1	#N/A
	SYT15	#N/A
	GLUD1P2	#N/A
	AGAP13P	#N/A
	BMS1P1	#N/A
chr10_inv11 (BP2)	FAM25G	y	n
	ANXA8	#N/A
chr10_inv10 (BP2)	SNORA74C-2	y	n
	AGAP6	#N/A
	FAM21EP	#N/A
	TIMM23B	#N/A
	TIMM23B-AGAP6	#N/A
	ASAH2	#N/A
	PARG	#N/A
	WASHC2A	#N/A
chr10_inv12 (BP1)	SNORA74C-2	y	n
	AGAP6	#N/A
	FAM21EP	#N/A
	TIMM23B	#N/A
	TIMM23B-AGAP6	#N/A
	ASAH2	#N/A
	PARG	#N/A
	WASHC2A	#N/A
chr10_inv12 (BP2)	ASAH2B	y	n
chr10_inv14 (BP1)	CTNNA3	n	y
chr10_inv14 (BP2)	CTNNA3	n	y
chr10_inv15 (BP1)	CTNNA3	n	y
chr10_inv15 (BP2)	CTNNA3	n	y
chr10_inv16 (BP1)	LOC729815	y	n
	EIF5AL1	#N/A
chr10_inv16 (BP2)	LOC100130698	y	n
	LINC00857	#N/A
chr11_inv3 (BP1)	LINC02760	n	n
chr11_inv7 (BP1)	RAB6A	n	y
chr11_inv7 (BP2)	MRPL48	n	y
chr11_inv10 (BP1)	OPCML	n	n
chr11_inv10 (BP2)	OPCML	n	n
chr11_inv11 (BP1)	JAM3	n	n
chr11_inv11 (BP2)	JAM3	n	n
chr12_inv4 (BP2)	OR10A7	n	n
	OR6C74	#N/A
chr12_inv5 (BP1)	LOC105369911	n	y
chr12_inv7 (BP2)	C12orf75-AS1	n	n
chr13_inv1 (BP1)	LOC105370295	y	n
	TPTE2P6	#N/A
chr13_inv1 (BP2)	TPTE2P1	y	n
chr13_inv4 (BP1)	TPT1-AS1	y	n
chr13_inv5 (BP1)	LINC02333	y	n
	MRPS31P5	#N/A
chr13_inv5 (BP2)	HNRNPA1L2	y	n
	TPTE2P3	#N/A
chr13_inv8 (BP1)	LINC00395	y	n
chr13_inv8 (BP2)	LOC112267897	y	n
	OR7E156P	#N/A
	LINC00395	#N/A
chr13_inv10 (BP1)	UGGT2	n	y
	HS6ST3	#N/A
chr13_inv10 (BP2)	IPO5	n	y
chr14_inv1 (BP1)	OR11H2	y	y
	OR4Q3	#N/A
	OR4K3	#N/A
	OR4K2	#N/A
	OR4K5	#N/A
	OR4K1	#N/A
	OR4K15	#N/A
	OR4Q2	#N/A
	OR4K14	#N/A
	OR4K13	#N/A
	OR4L1	#N/A
	OR4N5	#N/A
	OR4M1	#N/A
	OR4N2	#N/A
	OR4K17	#N/A
chr14_inv2 (BP1)	OR11H2	y	y
	OR4Q3	#N/A
	OR4K3	#N/A
	OR4K2	#N/A
	OR4K5	#N/A
	OR4K1	#N/A
	OR4K15	#N/A
	OR4M1	#N/A
	OR4N2	#N/A
chr14_inv2 (BP2)	OR4N5	y	n
	OR11G2	#N/A
	OR11H6	#N/A
	OR11H7	#N/A
	OR11H4	#N/A
chr14_inv1 (BP2)	RNASE3	y	y
	RNASE2CP	#N/A
	RNASE2	#N/A
chr14_inv9 (BP1)	SLC38A6	n	n
chr14_inv9 (BP2)	SLC38A6	n	n
chr15_inv1 (BP1)	GOLGA6L6	y	n
	GOLGA8CP	#N/A
	MIR3118-2	#N/A
	MIR5701-1	#N/A
	LOC646214	#N/A
	CXADRP2	#N/A
	MIR3118-3	#N/A
	MIR5701-2	#N/A
	OR4M2B	#N/A
	OR4N4C	#N/A
	LOC102724760	#N/A
	IGHV1OR15-3	#N/A
	MIR3118-4	#N/A
	MIR5701-3	#N/A
	OR4M2	#N/A
	OR4N4	#N/A
	OR4N3P	#N/A
	IGHV1OR15-1	#N/A
	LOC642131	#N/A
	MIR1268A	#N/A
	HERC2P7	#N/A
	GOLGA8IP	#N/A
	CHEK2P2	#N/A
	FAM30C	#N/A
	POTEB3	#N/A
	POTEB	#N/A
	NF1P2	#N/A
	GOLGA6L22	#N/A
	GOLGA8EP	#N/A
	LOC283683	#N/A
	HERC2P3	#N/A
	NBEAP1	#N/A
	POTEB2	#N/A
	LINC02203	#N/A
	HERC2P2	#N/A
	REREP3	#N/A
	WHAMMP3	#N/A
	LINC01193	#N/A
	LOC101927079	#N/A
chr15_inv1 (BP2)	MIR4509-1	y	n
	GOLGA6L1	#N/A
	GOLGA8DP	#N/A
	LOC102723534	#N/A
	GOLGA6L2	#N/A
	GOLGA8S	#N/A
	LOC102723623	#N/A
chr15_inv2 (BP1)	MIR4509-1	y	n
	GOLGA6L1	#N/A
	GOLGA8DP	#N/A
	LOC102723534	#N/A
	GOLGA6L2	#N/A
	GOLGA8S	#N/A
	LOC102723623	#N/A
chr15_inv2 (BP2)	GOLGA8O	y	n
	GOLGA8K	#N/A
	ULK4P1	#N/A
	GOLGA8N	#N/A
	LINC02256	#N/A
	LOC101928042	#N/A
	WHAMMP1	#N/A
	CHRNA7	#N/A
chr15_inv6 (BP1)	GOLGA6L9	y	n
	GOLGA6L10	#N/A
	UBE2Q2P2	#N/A
	GOLGA2P10	#N/A
	GOLGA6L17P	#N/A
	ADAMTS7P1	#N/A
	LOC102724034	#N/A
chr15_inv6 (BP2)	DNM1P41	y	n
	GOLGA6L4	#N/A
	LOC103171574	#N/A
	EFL1P1	#N/A
	GOLGA2P7	#N/A
	LOC440300	#N/A
	UBE2Q2L	#N/A
	GOLGA6L5P	#N/A
	LOC102724135	#N/A
	LINC00933	#N/A
	UBE2Q2P1	#N/A
	ADAMTSL3	#N/A
chr15_inv7 (BP1)	DNM1P41	y	n
	GOLGA6L4	#N/A
	LOC103171574	#N/A
	EFL1P1	#N/A
	GOLGA2P7	#N/A
	LOC440300	#N/A
	UBE2Q2L	#N/A
	GOLGA6L5P	#N/A
	LOC102724135	#N/A
	LINC00933	#N/A
	UBE2Q2P1	#N/A
	ADAMTSL3	#N/A
chr15_inv7 (BP2)	GOLGA6L3	y	n
	LOC101929479	#N/A
	LOC727751	#N/A
chr15_inv8 (BP1)	DNM1P46	n	y
	ADAMTS17	#N/A
	LOC400464	#N/A
chr15_inv8 (BP2)	OR4F6	y	y
	OR4F15	#N/A
	LINC02348	#N/A
	TM2D3	#N/A
	LOC100128108	#N/A
	OR4F13P	#N/A
	TARS3	#N/A
chr16_inv1 (BP2)	SRRM2-AS1	n	n
chr16_inv2 (BP1)	PRSS33	n	y
chr16_inv3 (BP2)	MIR6511A4	y	n
	MIR6770-3	#N/A
	MIR3179-3	#N/A
	MIR3180-3	#N/A
	MIR3670-3	#N/A
	MIR3179-4	#N/A
	MIR3670-4	#N/A
	RPS15A	#N/A
	NPIPA8	#N/A
	PKD1P5-LOC105376752	#N/A
	ABCC6P1	#N/A
	NOMO2	#N/A
	PKD1P4-NPIPA8	#N/A
chr16_inv4 (BP1)	LOC100190986	y	n
	MIR3680-1	#N/A
	SLC7A5P2	#N/A
	NPIPB3	#N/A
	SMG1P3	#N/A
	SNX29P1	#N/A
chr16_inv4 (BP2)	NPIPB4	y	n
	RRN3P1	#N/A
	OTOA	#N/A
chr16_inv5 (BP1)	NPIPB4	y	n
	RRN3P1	#N/A
	OTOA	#N/A
chr16_inv5 (BP2)	NPIPB5	y	n
	RRN3P3	#N/A
	SMG1P1	#N/A
	OTOAP1	#N/A
chr16_inv6 (BP1)	SULT1A2	y	n
	MIR6862-2	#N/A
	NPIPB8	#N/A
	SULT1A1	#N/A
	NPIPB9	#N/A
	EIF3C	#N/A
	SGF29	#N/A
chr16_inv7 (BP1)	BOLA2	y	n
	BOLA2-SMG1P6	#N/A
	LOC606724	#N/A
	SLX1B	#N/A
	LOC388242	#N/A
	SULT1A4	#N/A
	MIR3680-2	#N/A
	NPIPB11	#N/A
	SLX1B-SULT1A4	#N/A
	SMG1P6	#N/A
	SMG1P2	#N/A
	RRN3P2	#N/A
	NPIPB12	#N/A
	SNX29P2	#N/A
chr16_inv6 (BP2)	BOLA2	y	n
	BOLA2-SMG1P6	#N/A
	LOC606724	#N/A
	SLX1B	#N/A
	LOC388242	#N/A
	SULT1A4	#N/A
	MIR3680-2	#N/A
	NPIPB11	#N/A
	SLX1B-SULT1A4	#N/A
	SMG1P6	#N/A
	SMG1P2	#N/A
	RRN3P2	#N/A
	NPIPB12	#N/A
	SNX29P2	#N/A
chr16_inv7 (BP2)	BOLA2B	y	n
	CORO1A	#N/A
	LOC613038	#N/A
	SULT1A3	#N/A
	NPIPB13	#N/A
	SLX1A	#N/A
	SLX1A-SULT1A3	#N/A
	SMG1P5	#N/A
chr16_inv8 (BP2)	VN1R3	y	n
	ZNF267	#N/A
chr16_inv9 (BP1)	SHCBP1	y	y
	MYLK3	#N/A
	ORC6	#N/A
	ANKRD26P1	#N/A
	VPS35	#N/A
chr16_inv9 (BP2)	LONP2	n	y
	ABCC12	#N/A
	ABCC11	#N/A
chr16_inv11 (BP1)	MIR1972-2	y	n
	CLEC18C	#N/A
	EXOSC6	#N/A
	CLEC18A	#N/A
	LOC105371328	#N/A
	LOC400541	#N/A
	SMG1P7	#N/A
	PDPR	#N/A
	PDXDC2P-NPIPB14P	#N/A
chr16_inv12 (BP2)	CTRB1	n	n
chr17_inv1 (BP1)	OR1D5	y	n
	OR1G1	#N/A
	OR1D2	#N/A
	LOC100288728	#N/A
chr17_inv1 (BP2)	OR1A2	y	n
	OR1D4	#N/A
	OR1A1	#N/A
	LOC100288728	#N/A
chr17_inv3 (BP2)	TBC1D26	y	y
	CDRT15P2	#N/A
	MEIS3P1	#N/A
	TVP23C	#N/A
	TRIM16	#N/A
	ZNF286A	#N/A
	LINC02087	#N/A
	CDRT1	#N/A
	TVP23C-CDRT4	#N/A
	ZNF286A-TBC1D26	#N/A
chr17_inv4 (BP1)	TBC1D26	y	y
	CDRT15P2	#N/A
	MEIS3P1	#N/A
	TVP23C	#N/A
	TRIM16	#N/A
	ZNF286A	#N/A
	LINC02087	#N/A
	CDRT1	#N/A
	TVP23C-CDRT4	#N/A
	ZNF286A-TBC1D26	#N/A
chr17_inv5 (BP1)	FAM106C	y	n
	KRT16P2	#N/A
	KRT17P1	#N/A
	USP32P1	#N/A
	CCDC144A	#N/A
chr17_inv4 (BP2)	FAM106C	y	n
	KRT16P2	#N/A
	KRT17P1	#N/A
	USP32P1	#N/A
	CCDC144A	#N/A
chr17_inv5 (BP2)	LINC02076	y	y
	KRT17P2	#N/A
	KRT17P5	#N/A
	KRT16P1	#N/A
	FAM106A	#N/A
	TBC1D28	#N/A
	EVPLL	#N/A
	USP32P2	#N/A
	FOXO3B	#N/A
	TRIM16L	#N/A
	ZNF286B	#N/A
	FBXW10	#N/A
	LOC101929141	#N/A
	TVP23B	#N/A
	CCDC144B	#N/A
	LGALS9C	#N/A
chr17_inv6 (BP1)	LINC02076	y	y
	KRT17P2	#N/A
	KRT17P5	#N/A
	KRT16P1	#N/A
	FAM106A	#N/A
	TBC1D28	#N/A
	EVPLL	#N/A
	USP32P2	#N/A
	FOXO3B	#N/A
	TRIM16L	#N/A
	ZNF286B	#N/A
	FBXW10	#N/A
	LOC101929141	#N/A
	TVP23B	#N/A
	CCDC144B	#N/A
	LGALS9C	#N/A
chr17_inv6 (BP2)	PRPSAP2	n	y
chr17_inv8 (BP1)	TBC1D29P	y	y
	SMURF2P1-LRRC37BP1	#N/A
chr17_inv8 (BP2)	LOC107984974	y	y
	LOC646030	#N/A
chr17_inv9 (BP1)	TBC1D29P	y	n
	SMURF2P1-LRRC37BP1	#N/A
chr17_inv9 (BP2)	SUZ12	y	n
	SH3GL1P1
	LRRC37B	#N/A
chr17_inv10 (BP1)	SLC35G3	y	n
chr17_inv10 (BP2)	CCL3L3	y	n
	CCL4L2	#N/A
	TBC1D3G	#N/A
	TBC1D3H	#N/A
	TBC1D3I	#N/A
	TBC1D3B	#N/A
	TBC1D3F	#N/A
chr17_inv11 (BP1)	CCL3L3	y	n
	CCL4L2	#N/A
	TBC1D3G	#N/A
	TBC1D3H	#N/A
	TBC1D3I	#N/A
	TBC1D3B	#N/A
	TBC1D3F	#N/A
chr17_inv11 (BP2)	TBC1D3L	y	n
	TBC1D3E	#N/A
	TBC1D3K	#N/A
	LOC101929950	#N/A
	TBC1D3C	#N/A
	NPEPPSP1	#N/A
	TBC1D3	#N/A
	MRPL45	#N/A
	TBC1D3D	#N/A
	YWHAEP7	#N/A
chr17_inv12 (BP1)	ARL17B	y	n
	LRRC37A	#N/A
	ARL17A	#N/A
	LRRC37A2	#N/A
	NSF	#N/A
	NSFP1	#N/A
	KANSL1	#N/A
chr17_inv13 (BP2)	MIR4737	y	y
	WFDC21P	#N/A
	LOC653653	#N/A
	RNFT1-DT	#N/A
	TBC1D3P1-DHX40P1	#N/A
	HEATR6	#N/A
	HEATR6-DT	#N/A
chr17_inv14 (BP1)	TTYH2	n	y
chr17_inv14 (BP2)	BTBD17	n	y
	GPR142	#N/A
	KIF19	#N/A
chr17_inv15 (BP1)	FADS6	n	y
chr17_inv15 (BP2)	SEC14L1	n	y
chr17_inv16 (BP2)	RPL23AP87	y	y
chr18_inv1 (BP1)	L3MBTL4	n	y
chr18_inv1 (BP2)	L3MBTL4	n	y
chr18_inv2 (BP1)	LINC01887	y	n
chr18_inv2 (BP2)	ANKRD62	y	n
	C18orf61	#N/A
chr19_inv2 (BP2)	LGALS14	n	n
chr19_inv3 (BP1)	SIGLEC11	y	n
chr19_inv3 (BP2)	SIGLEC16	y	n
chr22_inv1 (BP1)	GGTLC3	y	n
	RIMBP3	#N/A
	FAM246B	#N/A
	FAM246C	#N/A
	FAM230D	#N/A
	USP18	#N/A
	FAM230J	#N/A
	PI4KAP1	#N/A
	TMEM191B	#N/A
	GGT3P	#N/A
	POM121L15P	#N/A
	DGCR6	#N/A
	LOC122455341	#N/A
	PRODH	#N/A
	FAM230A	#N/A
	FAM230E	#N/A
	DGCR5	#N/A
	FAM230F	#N/A
chr22_inv1 (BP2)	POM121L4P	y	n
chr22_inv2 (BP1)	TUBA3FP	y	n
	MIR649	#N/A
	SLC7A4	#N/A
	P2RX6P	#N/A
	FAM246A	#N/A
	LINC01651	#N/A
	RIMBP3B	#N/A
	TMEM191C	#N/A
	RIMBP3C	#N/A
	LRRC74B	#N/A
	P2RX6	#N/A
	BCRP2	#N/A
	FAM230B	#N/A
	FAM230H	#N/A
	POM121L8P	#N/A
	HIC2	#N/A
	UBE2L3	#N/A
	GGT2	#N/A
	PI4KAP2	#N/A
chr22_inv2 (BP2)	LINC02556	y	n
	LINC01659	#N/A
	CES5AP1	#N/A
	ZDHHC8P1	#N/A
	FAM230I	#N/A
	IGLL1	#N/A
	PCAT14	#N/A
	DRICH1	#N/A
	GUSBP11	#N/A
	BCR	#N/A
chr22_inv5 (BP1)	GGT5	y	y
	POM121L9P	#N/A
	SPECC1L	#N/A
	SPECC1L-ADORA2A	#N/A
chr22_inv5 (BP2)	GGT1	y	y
	POM121L10P	#N/A
	BCRP3	#N/A
chr22_inv6 (BP1)	RFPL1	y	y
	RFPL1S	#N/A
chr22_inv6 (BP2)	C22orf42	y	y
	AP1B1P1	#N/A
	RFPL2	#N/A
chr22_inv7 (BP2)	SYN3	n	y
*NCBI RefSeq genes, curated subset - Homo sapiens 109.20211119 (2021-11-23)

## Sheet: Supplemental_Table_S10
Supplemental Table S10. Gene Ontology output for 586 genes. Genes are sorted according to the pValue significance.
Category	ID	Name	Source	p-value	q-value Bonferroni	q-value FDR B&H	q-value FDR B&Y	Hit Count in Query List	Hit Count in Genome	Hit in Query List
GO: Molecular Function	GO:0004984	olfactory receptor activity		4.844e-21	3.003e-18	3.003e-18	2.104e-17	44	434	OR2M7,OR2L3,OR2T33,OR2M2,OR4N4,OR4F3,OR2M5,OR2T12,OR4M2B,OR1A1,OR1D5,OR1G1,OR4K15,OR4N2,OR4K2,OR4N5,OR4K17,OR11G2,OR4K13,OR4Q2,OR11H7,OR11H4,OR4M1,OR4Q3,OR4M2,OR4K5,OR11H2,OR4F15,OR4F6,OR4F13P,OR10A7,OR2L5,OR1A2,OR2L2,OR4K1,OR6C74,OR1D4,OR2L13,OR4K14,OR4L1,OR11H6,LINC02203,OR1D2,OR4K3
	GO:0008242	omega peptidase activity		1.514e-12	9.387e-10	4.693e-10	3.289e-09	21	138	USP18,GGTLC3,USP17L24,USP17L5,USP17L28,USP17L6P,USP17L9P,USP17L22,USP17L15,USP17L21,USP17L20,USP17L19,GGT1,GGT3P,USP17L18,GGT5,USP17L17,USP17L13,USP17L12,USP17L11,USP17L10
	GO:0004930	G protein-coupled receptor activity		6.771e-12	4.198e-09	1.399e-09	9.807e-09	48	886	OR2M7,OR2L3,OR2T33,OR2M2,OR4N4,OR4F3,OR2M5,OR2T12,OR4M2B,GPR142,OR1A1,OR1D5,OR1G1,OR4K15,VN1R3,OR4N2,OR4K2,OR4N5,OR4K17,OR11G2,OR4K13,OR4Q2,OR11H7,OR11H4,OR4M1,OR4Q3,OR4M2,NPY4R,OR4K5,OR11H2,OR4F15,OR4F6,OR4F13P,OR10A7,OR2L5,OR1A2,OR2L2,OR4K1,DRD5,OR6C74,OR1D4,OR2L13,OR4K14,OR4L1,OR11H6,LINC02203,OR1D2,OR4K3
	GO:0004843	cysteine-type deubiquitinase activity		3.994e-09	2.476e-06	5.39e-07	3.777e-06	17	123	USP18,USP17L24,USP17L5,USP17L28,USP17L6P,USP17L9P,USP17L22,USP17L15,USP17L21,USP17L20,USP17L19,USP17L18,USP17L17,USP17L13,USP17L12,USP17L11,USP17L10
	GO:0101005	deubiquitinase activity		4.567e-09	2.832e-06	5.39e-07	3.777e-06	17	124	USP18,USP17L24,USP17L5,USP17L28,USP17L6P,USP17L9P,USP17L22,USP17L15,USP17L21,USP17L20,USP17L19,USP17L18,USP17L17,USP17L13,USP17L12,USP17L11,USP17L10
	GO:0004197	cysteine-type endopeptidase activity		5.216e-09	3.234e-06	5.39e-07	3.777e-06	17	125	USP18,USP17L24,USP17L5,USP17L28,USP17L6P,USP17L9P,USP17L22,USP17L15,USP17L21,USP17L20,USP17L19,USP17L18,USP17L17,USP17L13,USP17L12,USP17L11,USP17L10
	GO:0004888	transmembrane signaling receptor activity		3.035e-07	0.0001881	2.688e-05	0.0001883	52	1362	OR2M7,OR2L3,OR2T33,OR2M2,OR4N4,OR4F3,OR2M5,OR2T12,CHRNA7,OR4M2B,GPR142,OR1A1,OR1D5,OR1G1,OR4K15,VN1R3,OR4N2,OR4K2,OR4N5,OR4K17,OR11G2,OR4K13,OR4Q2,OR11H7,OR11H4,OR4M1,OR4Q3,ANTXRL,OR4M2,NPY4R,OR4K5,OR11H2,OR4F15,OR4F6,OR4F13P,OR10A7,OR2L5,OR1A2,OR2L2,EDAR,OR4K1,DRD5,OR6C74,OR1D4,OR2L13,OR4K14,OR4L1,OR11H6,LINC02203,OR1D2,P2RX6,OR4K3
	GO:0005549	odorant binding		5.036e-06	0.003122	0.0003903	0.002735	18	218	OR1A1,OR1D5,OR4K15,VN1R3,OR4N2,OR4K2,OR4N5,OR4M1,OR4Q3,OR4M2,OR4K5,OR4F15,OR4F6,OR4F13P,OR1A2,OR4K1,OR4L1,OR1D2
	GO:0050656	3'-phosphoadenosine 5'-phosphosulfate binding		2.823e-05	0.0175	0.001945	0.01363	6	14	HS6ST3,SULT1A2,SULT1A1,SULT1A3,SULT1C3,SULT1A4
	GO:0038023	signaling receptor activity		4.836e-05	0.02998	0.002532	0.01774	53	1628	OR2M7,OR2L3,OR2T33,OR2M2,OR4N4,OR4F3,OR2M5,OR2T12,CHRNA7,OR4M2B,GPR142,ANXA2R,OR1A1,OR1D5,OR1G1,OR4K15,VN1R3,OR4N2,OR4K2,OR4N5,OR4K17,OR11G2,OR4K13,OR4Q2,OR11H7,OR11H4,OR4M1,OR4Q3,ANTXRL,OR4M2,NPY4R,OR4K5,OR11H2,OR4F15,OR4F6,OR4F13P,OR10A7,OR2L5,OR1A2,OR2L2,EDAR,OR4K1,DRD5,OR6C74,OR1D4,OR2L13,OR4K14,OR4L1,OR11H6,LINC02203,OR1D2,P2RX6,OR4K3
	GO:0060089	molecular transducer activity		4.836e-05	0.02998	0.002532	0.01774	53	1628	OR2M7,OR2L3,OR2T33,OR2M2,OR4N4,OR4F3,OR2M5,OR2T12,CHRNA7,OR4M2B,GPR142,ANXA2R,OR1A1,OR1D5,OR1G1,OR4K15,VN1R3,OR4N2,OR4K2,OR4N5,OR4K17,OR11G2,OR4K13,OR4Q2,OR11H7,OR11H4,OR4M1,OR4Q3,ANTXRL,OR4M2,NPY4R,OR4K5,OR11H2,OR4F15,OR4F6,OR4F13P,OR10A7,OR2L5,OR1A2,OR2L2,EDAR,OR4K1,DRD5,OR6C74,OR1D4,OR2L13,OR4K14,OR4L1,OR11H6,LINC02203,OR1D2,P2RX6,OR4K3
	GO:0017067	tyrosine-ester sulfotransferase activity		4.901e-05	0.03039	0.002532	0.01774	4	4	SULT1A2,SULT1A1,SULT1A3,SULT1A4
	GO:0005096	GTPase activator activity		7.568e-05	0.04692	0.00361	0.02529	19	289	TBC1D3G,TBC1D3K,TBC1D3F,RGPD5,TBC1D3L,TBC1D3D,TBC1D28,TBC1D3C,TBC1D3B,AGAP6,ADAP2,BCR,TBC1D3I,TBC1D3E,RANBP2,TBC1D3,TBC1D3H,TBC1D26,AGAP7P
	GO:0004062	aryl sulfotransferase activity		0.0001682	0.1043	0.007448	0.0522	5	10	SULT1A2,SULT1A1,SULT1A3,SULT1C3,SULT1A4
	GO:0047894	flavonol 3-sulfotransferase activity		0.0002386	0.1479	0.009861	0.0691	4	5	SULT1A2,SULT1A1,SULT1A3,SULT1A4
	GO:0008234	cysteine-type peptidase activity		0.0002581	0.16	0.01	0.07009	17	252	USP18,USP17L24,USP17L5,USP17L28,USP17L6P,USP17L9P,USP17L22,USP17L15,USP17L21,USP17L20,USP17L19,USP17L18,USP17L17,USP17L13,USP17L12,USP17L11,USP17L10
	GO:0008047	enzyme activator activity		0.0003115	0.1931	0.01136	0.07961	27	595	LGALS9C,TBC1D3G,TBC1D3K,TBC1D3F,RGPD5,TBC1D3L,TBC1D3D,TBC1D28,CCL3L3,TBC1D3C,TBC1D3B,NCF1C,NCF1B,AGAP6,ADAP2,CAB39,WFDC21P,BCR,TBC1D3I,RAB6A,TBC1D3E,RANBP2,TBC1D3,TBC1D3H,TBC1D26,TEFM,AGAP7P
	GO:0043325	phosphatidylinositol-3,4-bisphosphate binding		0.0008746	0.5422	0.03012	0.2111	7	36	ANXA8L1,COMMD1,NCF1C,NCF1B,ADAP2,WASHC2A,ANXA8
	GO:0050294	steroid sulfotransferase activity		0.001631	1.011	0.05322	0.3729	4	7	SULT1A2,SULT1A1,SULT1A3,SULT1A4
	GO:0030695	GTPase regulator activity		0.005611	3.479	0.1693	1.186	22	495	TBC1D3G,TBC1D3K,TBC1D3F,RGPD5,TBC1D3L,TBC1D3D,TBC1D28,TBC1D3C,TBC1D3B,CCZ1,AGAP6,ADAP2,BCR,TBC1D3I,IPO5,CCZ1B,TBC1D3E,RANBP2,TBC1D3,TBC1D3H,TBC1D26,AGAP7P
	GO:0036374	glutathione hydrolase activity		0.005734	3.555	0.1693	1.186	4	9	GGTLC3,GGT1,GGT3P,GGT5
	GO:0060589	nucleoside-triphosphatase regulator activity		0.00709	4.396	0.1998	1.4	23	541	TBC1D3G,TBC1D3K,TBC1D3F,RGPD5,TBC1D3L,TBC1D3D,TBC1D28,TBC1D3C,TBC1D3B,CCZ1,AGAP6,ADAP2,BCR,TBC1D3I,RAB6A,IPO5,CCZ1B,TBC1D3E,RANBP2,TBC1D3,TBC1D3H,TBC1D26,AGAP7P
	GO:0008233	peptidase activity		0.008216	5.094	0.2215	1.552	32	922	USP18,NPEPPSP1,GGTLC3,USP17L24,USP17L5,PRSS33,USP17L28,USP17L6P,USP17L9P,CTRB1,USP17L22,USP17L15,USP17L21,WFDC21P,USP17L20,AMZ1,USP17L19,PRSS40B,GGT1,GGT3P,USP17L18,GGT5,USP17L17,SIMC1,ADAMTS17,USP17L13,USP17L12,LONP2,USP17L11,USP17L10,ADAMTSL3,PRSS40A
	GO:0030156	benzodiazepine receptor binding		0.03201	19.85	0.827	5.796	3	5	RIMBP3,RIMBP3B,RIMBP3C
	GO:0004175	endopeptidase activity		0.03566	22.11	0.8844	6.198	25	683	USP18,USP17L24,USP17L5,PRSS33,USP17L28,USP17L6P,USP17L9P,CTRB1,USP17L22,USP17L15,USP17L21,WFDC21P,USP17L20,USP17L19,PRSS40B,USP17L18,USP17L17,ADAMTS17,USP17L13,USP17L12,LONP2,USP17L11,USP17L10,ADAMTSL3,PRSS40A
	GO:0002951	leukotriene-C(4) hydrolase		0.06332	39.26	1.51	10.58	3	6	GGT1,GGT3P,GGT5
	GO:0000048	peptidyltransferase activity		0.1096	67.94	2.427	17	3	7	GGT1,GGT3P,GGT5
	GO:0008821	crossover junction endodeoxyribonuclease activity		0.1096	67.94	2.427	17	3	7	SLX1B,SLX1A,TEFM
	GO:0008146	sulfotransferase activity		0.1472	91.25	3.147	22.05	6	54	HS6ST3,SULT1A2,SULT1A1,SULT1A3,SULT1C3,SULT1A4
	GO:0003924	GTPase activity		0.173	107.3	3.36	23.54	26	800	RAB6C,TBC1D3G,TBC1D3K,TBC1D3F,RGPD5,TBC1D3L,TBC1D3D,TBC1D28,TBC1D3C,DNM1P46,TBC1D3B,CCZ1,AGAP6,ADAP2,GBP1,BCR,TBC1D3I,RAB6A,IPO5,CCZ1B,TBC1D3E,RANBP2,TBC1D3,TBC1D3H,TBC1D26,AGAP7P
	GO:0103068	leukotriene C4 gamma-glutamyl transferase activity		0.1734	107.5	3.36	23.54	3	8	GGT1,GGT3P,GGT5
	GO:0102953	hypoglycin A gamma-glutamyl transpeptidase activity		0.1734	107.5	3.36	23.54	3	8	GGT1,GGT3P,GGT5
	GO:0016894	endonuclease activity, active with either ribo- or deoxyribonucleic acids and producing 3'-phosphomonoesters		0.1937	120.1	3.639	25.5	4	20	SLX1B,SLX1A,TEFM,RNASE2
	GO:0047685	amine sulfotransferase activity		0.2246	139.2	4.095	28.7	2	2	SULT1A3,SULT1A4
	GO:0016889	endodeoxyribonuclease activity, producing 3'-phosphomonoesters		0.4942	306.4	8.755	61.35	3	11	SLX1B,SLX1A,TEFM
	GO:0005547	phosphatidylinositol-3,4,5-trisphosphate binding		0.5898	365.7	10.16	71.18	5	46	ANXA8L1,COMMD1,ADAP2,WASHC2A,ANXA8
	GO:0039552	RIG-I binding		0.6571	407.4	10.45	73.2	2	3	SEC14L1,RNF135
	GO:0032089	NACHT domain binding		0.6571	407.4	10.45	73.2	2	3	TRIM16,TRIM16L
	GO:0070774	phytoceramidase activity		0.6571	407.4	10.45	73.2	2	3	ASAH2,ASAH2B
	GO:0016782	transferase activity, transferring sulphur-containing groups		0.7662	475	11.88	83.22	6	73	HS6ST3,SULT1A2,SULT1A1,SULT1A3,SULT1C3,SULT1A4
	GO:0070003	threonine-type peptidase activity		1.249	774.5	18.89	132.4	4	32	GGTLC3,GGT1,GGT3P,GGT5
	GO:0009383	rRNA (cytosine-C5-)-methyltransferase activity		1.301	806.7	19.21	134.6	2	4	NSUN5P2,NSUN5
	GO:0017111	nucleoside-triphosphatase activity		1.367	847.6	19.71	138.1	36	1428	DDX58,ATAD5,ABCA11P,RAB6C,TBC1D3G,TBC1D3K,TBC1D3F,RGPD5,PMS2,TBC1D3L,TBC1D3D,TBC1D28,ABCC11,TBC1D3C,DNM1P46,TBC1D3B,CCZ1,AGAP6,ADAP2,GBP1,HNRNPA1L2,BCR,KIF19,TBC1D3I,RAB6A,IPO5,CCZ1B,TBC1D3E,RANBP2,TBC1D3,TBC1D3H,LONP2,NSF,TBC1D26,ABCC12,AGAP7P
	GO:0001042	RNA polymerase I core binding		2.147	1000	29.03	203.4	2	5	RRN3P2,RRN3P1
	GO:0071633	dihydroceramidase activity		2.147	1000	29.03	203.4	2	5	ASAH2,ASAH2B
	GO:1902936	phosphatidylinositol bisphosphate binding		2.154	1000	29.03	203.4	7	120	ANXA8L1,CLVS1,COMMD1,ADAP2,WASHC2A,SVIL,ANXA8
	GO:0016462	pyrophosphatase activity		2.71	1000	35.06	245.7	36	1487	DDX58,ATAD5,ABCA11P,RAB6C,TBC1D3G,TBC1D3K,TBC1D3F,RGPD5,PMS2,TBC1D3L,TBC1D3D,TBC1D28,ABCC11,TBC1D3C,DNM1P46,TBC1D3B,CCZ1,AGAP6,ADAP2,GBP1,HNRNPA1L2,BCR,KIF19,TBC1D3I,RAB6A,IPO5,CCZ1B,TBC1D3E,RANBP2,TBC1D3,TBC1D3H,LONP2,NSF,TBC1D26,ABCC12,AGAP7P
	GO:0016817	hydrolase activity, acting on acid anhydrides		2.771	1000	35.06	245.7	36	1489	DDX58,ATAD5,ABCA11P,RAB6C,TBC1D3G,TBC1D3K,TBC1D3F,RGPD5,PMS2,TBC1D3L,TBC1D3D,TBC1D28,ABCC11,TBC1D3C,DNM1P46,TBC1D3B,CCZ1,AGAP6,ADAP2,GBP1,HNRNPA1L2,BCR,KIF19,TBC1D3I,RAB6A,IPO5,CCZ1B,TBC1D3E,RANBP2,TBC1D3,TBC1D3H,LONP2,NSF,TBC1D26,ABCC12,AGAP7P
	GO:0016818	hydrolase activity, acting on acid anhydrides, in phosphorus-containing anhydrides		2.771	1000	35.06	245.7	36	1489	DDX58,ATAD5,ABCA11P,RAB6C,TBC1D3G,TBC1D3K,TBC1D3F,RGPD5,PMS2,TBC1D3L,TBC1D3D,TBC1D28,ABCC11,TBC1D3C,DNM1P46,TBC1D3B,CCZ1,AGAP6,ADAP2,GBP1,HNRNPA1L2,BCR,KIF19,TBC1D3I,RAB6A,IPO5,CCZ1B,TBC1D3E,RANBP2,TBC1D3,TBC1D3H,LONP2,NSF,TBC1D26,ABCC12,AGAP7P
	GO:0005546	phosphatidylinositol-4,5-bisphosphate binding		2.981	1000	36.82	258	6	95	ANXA8L1,COMMD1,ADAP2,WASHC2A,SVIL,ANXA8
	GO:0004430	1-phosphatidylinositol 4-kinase activity		3.189	1000	36.82	258	2	6	PI4KAP1,PI4KAP2
	GO:0016434	rRNA (cytosine) methyltransferase activity		3.189	1000	36.82	258	2	6	NSUN5P2,NSUN5
	GO:0008169	C-methyltransferase activity		3.189	1000	36.82	258	2	6	NSUN5P2,NSUN5
	GO:0030234	enzyme regulator activity		3.207	1000	36.82	258	33	1342	LGALS9C,UBE2L3,TBC1D3G,TBC1D3K,TBC1D3F,RGPD5,TBC1D3L,TBC1D3D,TBC1D28,CCL3L3,TBC1D3C,TBC1D3B,CCZ1,NCF1C,NCF1B,AGAP6,ADAP2,PRPSAP2,CAB39,WFDC21P,BCR,SIMC1,TBC1D3I,RAB6A,IPO5,CCZ1B,TBC1D3E,RANBP2,TBC1D3,TBC1D3H,TBC1D26,TEFM,AGAP7P
	GO:0061676	importin-alpha family protein binding		3.568	1000	40.22	281.9	3	21	GOLGA8N,GOLGA8K,GOLGA8O
	GO:0099589	serotonin receptor activity		3.772	1000	41.03	287.5	4	43	OR1D5,OR11H7,OR11H4,OR1D2
	GO:0004993	G protein-coupled serotonin receptor activity		3.772	1000	41.03	287.5	4	43	OR1D5,OR11H7,OR11H4,OR1D2
	GO:0070122	isopeptidase activity		4.086	1000	43.51	304.9	3	22	GGT1,GGT3P,GGT5
	GO:0038100	nodal binding		4.421	1000	43.51	304.9	2	7	CFC1,CFC1B
	GO:0001181	RNA polymerase I general transcription initiation factor activity		4.421	1000	43.51	304.9	2	7	RRN3P2,RRN3P1
	GO:0017040	N-acylsphingosine amidohydrolase activity		4.421	1000	43.51	304.9	2	7	ASAH2,ASAH2B
	GO:0102121	ceramidase activity		4.421	1000	43.51	304.9	2	7	ASAH2,ASAH2B
	GO:0043199	sulfate binding		4.421	1000	43.51	304.9	2	7	SULT1A3,SULT1A4
	GO:0051378	serotonin binding		4.817	1000	46.66	327	4	46	OR1D5,OR11H7,OR11H4,OR1D2
	GO:0050911	detection of chemical stimulus involved in sensory perception of smell		1.246e-21	4.332e-18	4.332e-18	3.783e-17	44	433	OR2M7,OR2L3,OR2T33,OR2M2,OR4N4,OR4F3,OR2M5,OR2T12,OR4M2B,OR1A1,OR1D5,OR1G1,OR4K15,OR4N2,OR4K2,OR4N5,OR4K17,OR11G2,OR4K13,OR4Q2,OR11H7,OR11H4,OR4M1,OR4Q3,OR4M2,OR4K5,OR11H2,OR4F15,OR4F6,OR4F13P,OR10A7,OR2L5,OR1A2,OR2L2,OR4K1,OR6C74,OR1D4,OR2L13,OR4K14,OR4L1,OR11H6,LINC02203,OR1D2,OR4K3
	GO:0071586	CAAX-box protein processing		7.51e-20	2.611e-16	7.932e-17	6.925e-16	15	23	USP17L5,USP17L28,USP17L6P,USP17L9P,USP17L22,USP17L15,USP17L21,USP17L20,USP17L19,USP17L18,USP17L17,USP17L13,USP17L12,USP17L11,USP17L10
	GO:0080120	CAAX-box protein maturation		7.51e-20	2.611e-16	7.932e-17	6.925e-16	15	23	USP17L5,USP17L28,USP17L6P,USP17L9P,USP17L22,USP17L15,USP17L21,USP17L20,USP17L19,USP17L18,USP17L17,USP17L13,USP17L12,USP17L11,USP17L10
	GO:0007608	sensory perception of smell		1.05e-19	3.65e-16	7.932e-17	6.925e-16	44	483	OR2M7,OR2L3,OR2T33,OR2M2,OR4N4,OR4F3,OR2M5,OR2T12,OR4M2B,OR1A1,OR1D5,OR1G1,OR4K15,OR4N2,OR4K2,OR4N5,OR4K17,OR11G2,OR4K13,OR4Q2,OR11H7,OR11H4,OR4M1,OR4Q3,OR4M2,OR4K5,OR11H2,OR4F15,OR4F6,OR4F13P,OR10A7,OR2L5,OR1A2,OR2L2,OR4K1,OR6C74,OR1D4,OR2L13,OR4K14,OR4L1,OR11H6,LINC02203,OR1D2,OR4K3
	GO:0050907	detection of chemical stimulus involved in sensory perception		1.141e-19	3.966e-16	7.932e-17	6.925e-16	44	484	OR2M7,OR2L3,OR2T33,OR2M2,OR4N4,OR4F3,OR2M5,OR2T12,OR4M2B,OR1A1,OR1D5,OR1G1,OR4K15,OR4N2,OR4K2,OR4N5,OR4K17,OR11G2,OR4K13,OR4Q2,OR11H7,OR11H4,OR4M1,OR4Q3,OR4M2,OR4K5,OR11H2,OR4F15,OR4F6,OR4F13P,OR10A7,OR2L5,OR1A2,OR2L2,OR4K1,OR6C74,OR1D4,OR2L13,OR4K14,OR4L1,OR11H6,LINC02203,OR1D2,OR4K3
	GO:1900245	positive regulation of MDA-5 signaling pathway		1.977e-19	6.872e-16	1.145e-16	1e-15	15	24	USP17L5,USP17L28,USP17L6P,USP17L9P,USP17L22,USP17L15,USP17L21,USP17L20,USP17L19,USP17L18,USP17L17,USP17L13,USP17L12,USP17L11,USP17L10
	GO:0039529	RIG-I signaling pathway		2.145e-18	7.454e-15	9.766e-16	8.526e-15	18	48	DDX58,SEC14L1,RNF135,USP17L5,USP17L28,USP17L6P,USP17L9P,USP17L22,USP17L15,USP17L21,USP17L20,USP17L19,USP17L18,USP17L17,USP17L13,USP17L12,USP17L11,USP17L10
	GO:0039533	regulation of MDA-5 signaling pathway		2.528e-18	8.789e-15	9.766e-16	8.526e-15	15	27	USP17L5,USP17L28,USP17L6P,USP17L9P,USP17L22,USP17L15,USP17L21,USP17L20,USP17L19,USP17L18,USP17L17,USP17L13,USP17L12,USP17L11,USP17L10
	GO:0090315	negative regulation of protein targeting to membrane		2.528e-18	8.789e-15	9.766e-16	8.526e-15	15	27	USP17L5,USP17L28,USP17L6P,USP17L9P,USP17L22,USP17L15,USP17L21,USP17L20,USP17L19,USP17L18,USP17L17,USP17L13,USP17L12,USP17L11,USP17L10
	GO:0009593	detection of chemical stimulus		3.904e-18	1.357e-14	1.357e-15	1.185e-14	44	529	OR2M7,OR2L3,OR2T33,OR2M2,OR4N4,OR4F3,OR2M5,OR2T12,OR4M2B,OR1A1,OR1D5,OR1G1,OR4K15,OR4N2,OR4K2,OR4N5,OR4K17,OR11G2,OR4K13,OR4Q2,OR11H7,OR11H4,OR4M1,OR4Q3,OR4M2,OR4K5,OR11H2,OR4F15,OR4F6,OR4F13P,OR10A7,OR2L5,OR1A2,OR2L2,OR4K1,OR6C74,OR1D4,OR2L13,OR4K14,OR4L1,OR11H6,LINC02203,OR1D2,OR4K3
	GO:0031064	negative regulation of histone deacetylation		1.099e-17	3.821e-14	3.474e-15	3.033e-14	15	29	USP17L5,USP17L28,USP17L6P,USP17L9P,USP17L22,USP17L15,USP17L21,USP17L20,USP17L19,USP17L18,USP17L17,USP17L13,USP17L12,USP17L11,USP17L10
	GO:0039530	MDA-5 signaling pathway		2.17e-17	7.544e-14	5.803e-15	5.067e-14	15	30	USP17L5,USP17L28,USP17L6P,USP17L9P,USP17L22,USP17L15,USP17L21,USP17L20,USP17L19,USP17L18,USP17L17,USP17L13,USP17L12,USP17L11,USP17L10
	GO:1900246	positive regulation of RIG-I signaling pathway		2.17e-17	7.544e-14	5.803e-15	5.067e-14	15	30	USP17L5,USP17L28,USP17L6P,USP17L9P,USP17L22,USP17L15,USP17L21,USP17L20,USP17L19,USP17L18,USP17L17,USP17L13,USP17L12,USP17L11,USP17L10
	GO:0007606	sensory perception of chemical stimulus		3.879e-17	1.348e-13	9.631e-15	8.409e-14	44	561	OR2M7,OR2L3,OR2T33,OR2M2,OR4N4,OR4F3,OR2M5,OR2T12,OR4M2B,OR1A1,OR1D5,OR1G1,OR4K15,OR4N2,OR4K2,OR4N5,OR4K17,OR11G2,OR4K13,OR4Q2,OR11H7,OR11H4,OR4M1,OR4Q3,OR4M2,OR4K5,OR11H2,OR4F15,OR4F6,OR4F13P,OR10A7,OR2L5,OR1A2,OR2L2,OR4K1,OR6C74,OR1D4,OR2L13,OR4K14,OR4L1,OR11H6,LINC02203,OR1D2,OR4K3
	GO:0039528	cytoplasmic pattern recognition receptor signaling pathway in response to virus		5.617e-17	1.952e-13	1.302e-14	1.136e-13	18	56	DDX58,SEC14L1,RNF135,USP17L5,USP17L28,USP17L6P,USP17L9P,USP17L22,USP17L15,USP17L21,USP17L20,USP17L19,USP17L18,USP17L17,USP17L13,USP17L12,USP17L11,USP17L10
	GO:0039535	regulation of RIG-I signaling pathway		1.736e-16	6.035e-13	3.772e-14	3.293e-13	16	41	SEC14L1,USP17L5,USP17L28,USP17L6P,USP17L9P,USP17L22,USP17L15,USP17L21,USP17L20,USP17L19,USP17L18,USP17L17,USP17L13,USP17L12,USP17L11,USP17L10
	GO:0050906	detection of stimulus involved in sensory perception		2.384e-16	8.285e-13	4.874e-14	4.255e-13	44	588	OR2M7,OR2L3,OR2T33,OR2M2,OR4N4,OR4F3,OR2M5,OR2T12,OR4M2B,OR1A1,OR1D5,OR1G1,OR4K15,OR4N2,OR4K2,OR4N5,OR4K17,OR11G2,OR4K13,OR4Q2,OR11H7,OR11H4,OR4M1,OR4Q3,OR4M2,OR4K5,OR11H2,OR4F15,OR4F6,OR4F13P,OR10A7,OR2L5,OR1A2,OR2L2,OR4K1,OR6C74,OR1D4,OR2L13,OR4K14,OR4L1,OR11H6,LINC02203,OR1D2,OR4K3
	GO:0097354	prenylation		7.209e-16	2.506e-12	1.319e-13	1.152e-12	15	36	USP17L5,USP17L28,USP17L6P,USP17L9P,USP17L22,USP17L15,USP17L21,USP17L20,USP17L19,USP17L18,USP17L17,USP17L13,USP17L12,USP17L11,USP17L10
	GO:0018342	protein prenylation		7.209e-16	2.506e-12	1.319e-13	1.152e-12	15	36	USP17L5,USP17L28,USP17L6P,USP17L9P,USP17L22,USP17L15,USP17L21,USP17L20,USP17L19,USP17L18,USP17L17,USP17L13,USP17L12,USP17L11,USP17L10
	GO:0039531	regulation of viral-induced cytoplasmic pattern recognition receptor signaling pathway		1.034e-15	3.595e-12	1.798e-13	1.569e-12	16	45	SEC14L1,USP17L5,USP17L28,USP17L6P,USP17L9P,USP17L22,USP17L15,USP17L21,USP17L20,USP17L19,USP17L18,USP17L17,USP17L13,USP17L12,USP17L11,USP17L10
	GO:0090313	regulation of protein targeting to membrane		9.656e-15	3.356e-11	1.598e-12	1.395e-11	17	61	TCAF2,USP17L5,USP17L28,USP17L6P,USP17L9P,USP17L22,USP17L15,USP17L21,TCAF1,USP17L20,USP17L19,USP17L18,USP17L17,USP17L13,USP17L12,USP17L11,USP17L10
	GO:0043547	positive regulation of GTPase activity		3.947e-14	1.372e-10	6.236e-12	5.444e-11	36	442	TBC1D3G,TBC1D3K,TBC1D3F,RGPD5,TBC1D3L,TBC1D3D,TBC1D28,USP17L5,CCL4L2,USP17L28,CCL3L3,TBC1D3C,TBC1D3B,USP17L6P,USP17L9P,USP17L22,AGAP6,USP17L15,ADAP2,USP17L21,USP17L20,USP17L19,BCR,USP17L18,USP17L17,TBC1D3I,USP17L13,TBC1D3E,RANBP2,TBC1D3,TBC1D3H,USP17L12,USP17L11,USP17L10,TBC1D26,AGAP7P
	GO:1905476	negative regulation of protein localization to membrane		4.181e-14	1.453e-10	6.319e-12	5.517e-11	16	55	USP17L5,USP17L28,USP17L6P,USP17L9P,USP17L22,USP17L15,USP17L21,USP17L20,GBP1,USP17L19,USP17L18,USP17L17,USP17L13,USP17L12,USP17L11,USP17L10
	GO:1900027	regulation of ruffle assembly		3.401e-13	1.182e-09	4.926e-11	4.301e-10	15	51	USP17L5,USP17L28,USP17L6P,USP17L9P,USP17L22,USP17L15,USP17L21,USP17L20,USP17L19,USP17L18,USP17L17,USP17L13,USP17L12,USP17L11,USP17L10
	GO:0098586	cellular response to virus		5.873e-13	2.041e-09	8.166e-11	7.13e-10	19	104	LGALS9C,DDX58,SEC14L1,RNF135,USP17L5,USP17L28,USP17L6P,USP17L9P,USP17L22,USP17L15,USP17L21,USP17L20,USP17L19,USP17L18,USP17L17,USP17L13,USP17L12,USP17L11,USP17L10
	GO:0051606	detection of stimulus		6.65e-13	2.312e-09	8.891e-11	7.763e-10	46	793	OR2M7,OR2L3,OR2T33,OR2M2,OR4N4,OR4F3,OR2M5,OR2T12,OR4M2B,OR1A1,OR1D5,OR1G1,OR4K15,OR4N2,OR4K2,OR4N5,OR4K17,OR11G2,OR4K13,OR4Q2,OR11H7,OR11H4,PARG,OR4M1,OR4Q3,OR4M2,OR4K5,OR11H2,OR4F15,OR4F6,OR4F13P,OR10A7,OR2L5,OR1A2,OR2L2,OR4K1,OR6C74,OR1D4,OR2L13,OR4K14,OR4L1,OR11H6,LINC02203,OR1D2,OTOP1,OR4K3
	GO:1903318	negative regulation of protein maturation		1.205e-12	4.189e-09	1.496e-10	1.306e-09	15	55	USP17L5,USP17L28,USP17L6P,USP17L9P,USP17L22,USP17L15,USP17L21,USP17L20,USP17L19,USP17L18,USP17L17,USP17L13,USP17L12,USP17L11,USP17L10
	GO:0010955	negative regulation of protein processing		1.205e-12	4.189e-09	1.496e-10	1.306e-09	15	55	USP17L5,USP17L28,USP17L6P,USP17L9P,USP17L22,USP17L15,USP17L21,USP17L20,USP17L19,USP17L18,USP17L17,USP17L13,USP17L12,USP17L11,USP17L10
	GO:1903533	regulation of protein targeting		1.463e-12	5.087e-09	1.754e-10	1.532e-09	19	109	UBE2L3,TCAF2,USP17L5,USP17L28,USP17L6P,USP17L9P,USP17L22,USP17L15,USP17L21,TCAF1,USP17L20,USP17L19,USP17L18,USP17L17,USP17L13,USP17L12,USP17L11,USP17L10,PRKN
	GO:0070536	protein K63-linked deubiquitination		1.625e-12	5.648e-09	1.883e-10	1.644e-09	15	56	USP17L5,USP17L28,USP17L6P,USP17L9P,USP17L22,USP17L15,USP17L21,USP17L20,USP17L19,USP17L18,USP17L17,USP17L13,USP17L12,USP17L11,USP17L10
	GO:0071108	protein K48-linked deubiquitination		2.177e-12	7.567e-09	2.441e-10	2.131e-09	15	57	USP17L5,USP17L28,USP17L6P,USP17L9P,USP17L22,USP17L15,USP17L21,USP17L20,USP17L19,USP17L18,USP17L17,USP17L13,USP17L12,USP17L11,USP17L10
	GO:0043087	regulation of GTPase activity		2.261e-12	7.859e-09	2.456e-10	2.144e-09	37	532	TBC1D3G,TBC1D3K,TBC1D3F,RGPD5,TBC1D3L,TBC1D3D,TBC1D28,USP17L5,CCL4L2,USP17L28,CCL3L3,TBC1D3C,TBC1D3B,USP17L6P,USP17L9P,USP17L22,AGAP6,USP17L15,ADAP2,USP17L21,USP17L20,USP17L19,BCR,USP17L18,USP17L17,TBC1D3I,USP17L13,IPO5,TBC1D3E,RANBP2,TBC1D3,TBC1D3H,USP17L12,USP17L11,USP17L10,TBC1D26,AGAP7P
	GO:0002753	cytoplasmic pattern recognition receptor signaling pathway		2.614e-12	9.087e-09	2.754e-10	2.404e-09	18	97	DDX58,SEC14L1,RNF135,USP17L5,USP17L28,USP17L6P,USP17L9P,USP17L22,USP17L15,USP17L21,USP17L20,USP17L19,USP17L18,USP17L17,USP17L13,USP17L12,USP17L11,USP17L10
	GO:0050691	regulation of defense response to virus by host		2.758e-12	9.585e-09	2.819e-10	2.461e-09	17	83	DDX58,USP17L5,USP17L28,USP17L6P,USP17L9P,USP17L22,USP17L15,USP17L21,USP17L20,USP17L19,USP17L18,USP17L17,USP17L13,USP17L12,USP17L11,USP17L10,ZDHHC11
	GO:0031063	regulation of histone deacetylation		2.899e-12	1.008e-08	2.879e-10	2.514e-09	15	58	USP17L5,USP17L28,USP17L6P,USP17L9P,USP17L22,USP17L15,USP17L21,USP17L20,USP17L19,USP17L18,USP17L17,USP17L13,USP17L12,USP17L11,USP17L10
	GO:0034260	negative regulation of GTPase activity		4.643e-12	1.614e-08	4.483e-10	3.914e-09	16	72	USP17L5,USP17L28,USP17L6P,USP17L9P,USP17L22,USP17L15,USP17L21,USP17L20,USP17L19,USP17L18,USP17L17,USP17L13,IPO5,USP17L12,USP17L11,USP17L10
	GO:0062208	positive regulation of pattern recognition receptor signaling pathway		2.999e-11	1.042e-07	2.817e-09	2.46e-08	15	67	USP17L5,USP17L28,USP17L6P,USP17L9P,USP17L22,USP17L15,USP17L21,USP17L20,USP17L19,USP17L18,USP17L17,USP17L13,USP17L12,USP17L11,USP17L10
	GO:0097178	ruffle assembly		3.798e-11	1.32e-07	3.474e-09	3.034e-08	15	68	USP17L5,USP17L28,USP17L6P,USP17L9P,USP17L22,USP17L15,USP17L21,USP17L20,USP17L19,USP17L18,USP17L17,USP17L13,USP17L12,USP17L11,USP17L10
	GO:0090317	negative regulation of intracellular protein transport		9.394e-11	3.265e-07	8.373e-09	7.31e-08	15	72	USP17L5,USP17L28,USP17L6P,USP17L9P,USP17L22,USP17L15,USP17L21,USP17L20,USP17L19,USP17L18,USP17L17,USP17L13,USP17L12,USP17L11,USP17L10
	GO:0050688	regulation of defense response to virus		1.457e-10	5.064e-07	1.266e-08	1.105e-07	18	121	DDX58,SEC14L1,USP17L5,USP17L28,USP17L6P,USP17L9P,USP17L22,USP17L15,USP17L21,USP17L20,USP17L19,USP17L18,USP17L17,USP17L13,USP17L12,USP17L11,USP17L10,ZDHHC11
	GO:0031057	negative regulation of histone modification		3.286e-10	1.142e-06	2.786e-08	2.433e-07	15	78	USP17L5,USP17L28,USP17L6P,USP17L9P,USP17L22,USP17L15,USP17L21,USP17L20,USP17L19,USP17L18,USP17L17,USP17L13,USP17L12,USP17L11,USP17L10
	GO:0090311	regulation of protein deacetylation		4.865e-10	1.691e-06	4.027e-08	3.516e-07	15	80	USP17L5,USP17L28,USP17L6P,USP17L9P,USP17L22,USP17L15,USP17L21,USP17L20,USP17L19,USP17L18,USP17L17,USP17L13,USP17L12,USP17L11,USP17L10
	GO:0031529	ruffle organization		7.121e-10	2.475e-06	5.757e-08	5.026e-07	15	82	USP17L5,USP17L28,USP17L6P,USP17L9P,USP17L22,USP17L15,USP17L21,USP17L20,USP17L19,USP17L18,USP17L17,USP17L13,USP17L12,USP17L11,USP17L10
	GO:0070613	regulation of protein processing		8.994e-10	3.126e-06	7.105e-08	6.203e-07	16	99	USP17L5,USP17L28,USP17L6P,USP17L9P,USP17L22,USP17L15,USP17L21,USP17L20,USP17L19,USP17L18,USP17L17,USP17L13,USP17L12,USP17L11,TIMM23B,USP17L10
	GO:1903317	regulation of protein maturation		1.452e-09	5.045e-06	1.121e-07	9.789e-07	16	102	USP17L5,USP17L28,USP17L6P,USP17L9P,USP17L22,USP17L15,USP17L21,USP17L20,USP17L19,USP17L18,USP17L17,USP17L13,USP17L12,USP17L11,TIMM23B,USP17L10
	GO:0032387	negative regulation of intracellular transport		3.488e-09	1.212e-05	2.635e-07	2.301e-06	15	91	USP17L5,USP17L28,USP17L6P,USP17L9P,USP17L22,USP17L15,USP17L21,USP17L20,USP17L19,USP17L18,USP17L17,USP17L13,USP17L12,USP17L11,USP17L10
	GO:1903828	negative regulation of protein localization		7.853e-09	2.73e-05	5.808e-07	5.071e-06	18	152	COMMD1,USP17L5,USP17L28,VPS35,USP17L6P,USP17L9P,USP17L22,USP17L15,USP17L21,USP17L20,GBP1,USP17L19,USP17L18,USP17L17,USP17L13,USP17L12,USP17L11,USP17L10
	GO:1905268	negative regulation of chromatin organization		9.108e-09	3.166e-05	6.596e-07	5.759e-06	15	97	USP17L5,USP17L28,USP17L6P,USP17L9P,USP17L22,USP17L15,USP17L21,USP17L20,USP17L19,USP17L18,USP17L17,USP17L13,USP17L12,USP17L11,USP17L10
	GO:0016575	histone deacetylation		7.612e-08	0.0002646	5.4e-06	4.714e-05	15	112	USP17L5,USP17L28,USP17L6P,USP17L9P,USP17L22,USP17L15,USP17L21,USP17L20,USP17L19,USP17L18,USP17L17,USP17L13,USP17L12,USP17L11,USP17L10
	GO:0006612	protein targeting to membrane		9.646e-08	0.0003353	6.706e-06	5.855e-05	21	249	RPS15A,TCAF2,USP17L5,USP17L28,USP17L6P,USP17L9P,USP17L22,NCF1C,NCF1B,USP17L15,USP17L21,TCAF1,USP17L20,USP17L19,USP17L18,USP17L17,USP17L13,USP17L12,USP17L11,USP17L10,ZDHHC11
	GO:0009615	response to virus		1.107e-07	0.0003849	7.547e-06	6.59e-05	28	453	LGALS9C,DDX58,RPS15A,SEC14L1,RNF135,BTBD17,USP17L5,CCL4L2,USP17L28,CCL3L3,USP17L6P,USP17L9P,USP17L22,USP17L15,USP17L21,USP17L20,GBP1,USP17L19,USP17L18,USP17L17,USP17L13,USP17L12,USP17L11,USP17L10,TRIM52,RNASE2,RNASE3,ZDHHC11
	GO:0062207	regulation of pattern recognition receptor signaling pathway		2e-07	0.0006952	1.337e-05	0.0001167	16	140	SEC14L1,USP17L5,USP17L28,USP17L6P,USP17L9P,USP17L22,USP17L15,USP17L21,USP17L20,USP17L19,USP17L18,USP17L17,USP17L13,USP17L12,USP17L11,USP17L10
	GO:0140546	defense response to symbiont		5.127e-07	0.001782	3.3e-05	0.0002882	23	329	DDX58,SEC14L1,RNF135,USP17L5,USP17L28,USP17L6P,USP17L9P,USP17L22,USP17L15,USP17L21,USP17L20,GBP1,USP17L19,USP17L18,USP17L17,USP17L13,USP17L12,USP17L11,USP17L10,TRIM52,RNASE2,RNASE3,ZDHHC11
	GO:0051607	defense response to virus		5.127e-07	0.001782	3.3e-05	0.0002882	23	329	DDX58,SEC14L1,RNF135,USP17L5,USP17L28,USP17L6P,USP17L9P,USP17L22,USP17L15,USP17L21,USP17L20,GBP1,USP17L19,USP17L18,USP17L17,USP17L13,USP17L12,USP17L11,USP17L10,TRIM52,RNASE2,RNASE3,ZDHHC11
	GO:0033157	regulation of intracellular protein transport		1.051e-06	0.003654	6.644e-05	0.0005801	22	312	COMMD1,UBE2L3,TCAF2,USP17L5,USP17L28,USP17L6P,USP17L9P,PRKCQ,USP17L22,USP17L15,USP17L21,TCAF1,USP17L20,USP17L19,USP17L18,USP17L17,USP17L13,IPO5,USP17L12,USP17L11,USP17L10,PRKN
	GO:0006476	protein deacetylation		1.108e-06	0.003852	6.864e-05	0.0005993	15	135	USP17L5,USP17L28,USP17L6P,USP17L9P,USP17L22,USP17L15,USP17L21,USP17L20,USP17L19,USP17L18,USP17L17,USP17L13,USP17L12,USP17L11,USP17L10
	GO:1905475	regulation of protein localization to membrane		1.126e-06	0.003913	6.864e-05	0.0005993	20	257	COMMD1,TCAF2,USP17L5,USP17L28,USP17L6P,USP17L9P,USP17L22,USP17L15,USP17L21,TCAF1,USP17L20,GBP1,USP17L19,USP17L18,USP17L17,USP17L13,USP17L12,USP17L11,USP17L10,PRKN
	GO:0007600	sensory perception		1.463e-06	0.005084	8.766e-05	0.0007654	47	1250	OR2M7,OR2L3,OR2T33,OR2M2,OR4N4,OR4F3,OR2M5,OR2T12,CHRNA7,OR4M2B,OR1A1,OR1D5,OR1G1,OR4K15,OR4N2,OR4K2,OR4N5,OR4K17,OR11G2,OR4K13,OR4Q2,OR11H7,OR11H4,OR4M1,OR4Q3,CCL3L3,OR4M2,OR4K5,OR11H2,OR4F15,OR4F6,OR4F13P,OR10A7,OR2L5,OR1A2,OR2L2,OR4K1,OTOA,OR6C74,OR1D4,OR2L13,OR4K14,OR4L1,OR11H6,LINC02203,OR1D2,OR4K3
	GO:0051345	positive regulation of hydrolase activity		1.526e-06	0.005306	8.993e-05	0.0007852	40	958	LGALS9C,TBC1D3G,TBC1D3K,TBC1D3F,RGPD5,TBC1D3L,TBC1D3D,TBC1D28,USP17L5,CCL4L2,USP17L28,CCL3L3,TBC1D3C,TBC1D3B,USP17L6P,USP17L9P,USP17L22,AGAP6,USP17L15,ADAP2,USP17L21,USP17L20,USP17L19,BCR,USP17L18,USP17L17,TBC1D3I,RAB6A,USP17L13,TBC1D3E,RANBP2,DRD5,TBC1D3,TBC1D3H,USP17L12,USP17L11,USP17L10,RFPL1,TBC1D26,AGAP7P
	GO:0007186	G protein-coupled receptor signaling pathway		2.036e-06	0.007077	0.000118	0.00103	51	1440	OR2M7,OR2L3,OR2T33,OR2M2,OR4N4,OR4F3,OR2M5,OR2T12,OR4M2B,GPR142,OR1A1,OR1D5,OR1G1,OR4K15,VN1R3,OR4N2,OR4K2,OR4N5,OR4K17,OR11G2,OR4K13,OR4Q2,OR11H7,OR11H4,OR4M1,OR4Q3,CCL4L2,CCL3L3,OR4M2,NPY4R,AKR1C3,OR4K5,OR11H2,OR4F15,OR4F6,OR4F13P,OR10A7,OR2L5,OR1A2,OR2L2,OR4K1,DRD5,OR6C74,OR1D4,OR2L13,OR4K14,OR4L1,OR11H6,LINC02203,OR1D2,OR4K3
	GO:0090630	activation of GTPase activity		2.106e-06	0.00732	0.00012	0.001048	14	120	TBC1D3G,TBC1D3K,TBC1D3F,TBC1D3L,TBC1D3D,TBC1D28,TBC1D3C,TBC1D3B,BCR,TBC1D3I,TBC1D3E,TBC1D3,TBC1D3H,TBC1D26
	GO:0016485	protein processing		2.734e-06	0.009505	0.0001533	0.001338	21	299	ERO1B,USP17L5,USP17L28,VPS35,USP17L6P,USP17L9P,USP17L22,USP17L15,USP17L21,USP17L20,USP17L19,GGT1,GGT3P,USP17L18,USP17L17,USP17L13,USP17L12,LONP2,USP17L11,TIMM23B,USP17L10
	GO:0035601	protein deacylation		3.315e-06	0.01152	0.0001829	0.001597	15	146	USP17L5,USP17L28,USP17L6P,USP17L9P,USP17L22,USP17L15,USP17L21,USP17L20,USP17L19,USP17L18,USP17L17,USP17L13,USP17L12,USP17L11,USP17L10
	GO:0098732	macromolecule deacylation		4.821e-06	0.01676	0.0002618	0.002286	15	150	USP17L5,USP17L28,USP17L6P,USP17L9P,USP17L22,USP17L15,USP17L21,USP17L20,USP17L19,USP17L18,USP17L17,USP17L13,USP17L12,USP17L11,USP17L10
	GO:0051604	protein maturation		5.725e-06	0.0199	0.0003062	0.002673	23	373	BOLA2B,ERO1B,USP17L5,USP17L28,VPS35,USP17L6P,USP17L9P,USP17L22,USP17L15,USP17L21,USP17L20,USP17L19,GGT1,GGT3P,USP17L18,USP17L17,USP17L13,USP17L12,LONP2,USP17L11,TIMM23B,USP17L10,BOLA2
	GO:0002221	pattern recognition receptor signaling pathway		6.069e-06	0.0211	0.0003196	0.002791	19	255	LGALS9C,DDX58,SEC14L1,RNF135,USP17L5,USP17L28,USP17L6P,USP17L9P,USP17L22,USP17L15,USP17L21,USP17L20,USP17L19,USP17L18,USP17L17,USP17L13,USP17L12,USP17L11,USP17L10
	GO:0051224	negative regulation of protein transport		1.034e-05	0.03594	0.0005364	0.004683	16	183	USP17L5,USP17L28,USP17L6P,USP17L9P,USP17L22,USP17L15,USP17L21,USP17L20,USP17L19,USP17L18,USP17L17,USP17L13,USP17L12,USP17L11,USP17L10,PRKN
	GO:0090150	establishment of protein localization to membrane		1.06e-05	0.03684	0.0005418	0.004731	24	418	RPS15A,COMMD1,TCAF2,USP17L5,USP17L28,VPS35,USP17L6P,USP17L9P,USP17L22,NCF1C,NCF1B,USP17L15,USP17L21,TCAF1,USP17L20,USP17L19,USP17L18,USP17L17,USP17L13,USP17L12,NSF,USP17L11,USP17L10,ZDHHC11
	GO:0002699	positive regulation of immune effector process		1.401e-05	0.04869	0.0007056	0.006161	21	328	LGALS9C,DDX58,ATAD5,PMS2,DEFB131A,USP17L5,USP17L28,USP17L6P,USP17L9P,USP17L22,USP17L15,USP17L21,USP17L20,USP17L19,USP17L18,USP17L17,EXOSC6,USP17L13,USP17L12,USP17L11,USP17L10
	GO:1904950	negative regulation of establishment of protein localization		1.52e-05	0.05282	0.0007546	0.006589	16	188	USP17L5,USP17L28,USP17L6P,USP17L9P,USP17L22,USP17L15,USP17L21,USP17L20,USP17L19,USP17L18,USP17L17,USP17L13,USP17L12,USP17L11,USP17L10,PRKN
	GO:0018215	protein phosphopantetheinylation		2.062e-05	0.07168	0.00101	0.008814	22	367	USP18,ERO1B,USP17L24,USP17L5,USP17L28,USP17L6P,USP17L9P,USP17L22,USP17L15,USP17L21,USP17L20,USP17L19,GGT1,GGT3P,USP17L18,GGT5,USP17L17,USP17L13,USP17L12,USP17L11,USP17L10,ZDHHC11
	GO:0006886	intracellular protein transport		2.583e-05	0.08978	0.001247	0.01089	55	1745	ARL17B,ORC6,RPS15A,RAB6C,COMMD1,UBE2L3,TBC1D3G,TBC1D3K,TBC1D3F,RGPD5,TCAF2,TBC1D3L,TBC1D3D,TBC1D28,USP17L5,USP17L28,TBC1D3C,TBC1D3B,VPS35,USP17L6P,USP17L9P,PRKCQ,CROCC,USP17L22,NCF1C,NCF1B,USP17L15,USP17L21,TCAF1,USP17L20,USP17L19,BCR,USP17L18,POM121,USP17L17,TBC1D3I,RAB6A,USP17L13,IPO5,TBC1D3E,RANBP2,MEIG1,TBC1D3,TBC1D3H,USP17L12,TCP10L3,LONP2,NSF,USP17L11,TIMM23B,USP17L10,TBC1D26,EIF5AL1,PRKN,Z…
	GO:0030522	intracellular receptor signaling pathway		2.889e-05	0.1004	0.001375	0.01201	21	342	DDX58,SEC14L1,RNF135,USP17L5,USP17L28,TRIM16,USP17L6P,AKR1C3,USP17L9P,USP17L22,USP17L15,USP17L21,USP17L20,USP17L19,USP17L18,USP17L17,TRIM16L,USP17L13,USP17L12,USP17L11,USP17L10
	GO:0016579	protein deubiquitination		4.578e-05	0.1591	0.002151	0.01878	19	289	USP18,DDX58,USP17L24,USP17L5,USP17L28,USP17L6P,USP17L9P,USP17L22,USP17L15,USP17L21,USP17L20,USP17L19,USP17L18,USP17L17,USP17L13,USP17L12,USP17L11,USP17L10,PRKN
	GO:0031056	regulation of histone modification		9.365e-05	0.3255	0.004318	0.0377	16	214	PARG,USP17L5,USP17L28,USP17L6P,USP17L9P,USP17L22,USP17L15,USP17L21,USP17L20,USP17L19,USP17L18,USP17L17,USP17L13,USP17L12,USP17L11,USP17L10
	GO:0120032	regulation of plasma membrane bounded cell projection assembly		9.44e-05	0.3281	0.004318	0.0377	18	272	USP17L5,USP17L28,USP17L6P,USP17L9P,PRKCQ,CROCC,USP17L22,USP17L15,USP17L21,USP17L20,USP17L19,USP17L18,USP17L17,USP17L13,TBC1D3,USP17L12,USP17L11,USP17L10
	GO:0006605	protein targeting		9.809e-05	0.341	0.004428	0.03866	25	506	RPS15A,UBE2L3,TCAF2,USP17L5,USP17L28,USP17L6P,USP17L9P,USP17L22,NCF1C,NCF1B,USP17L15,USP17L21,TCAF1,USP17L20,USP17L19,USP17L18,USP17L17,USP17L13,USP17L12,LONP2,USP17L11,TIMM23B,USP17L10,PRKN,ZDHHC11
	GO:0070646	protein modification by small protein removal		0.0001126	0.3915	0.00502	0.04383	19	306	USP18,DDX58,USP17L24,USP17L5,USP17L28,USP17L6P,USP17L9P,USP17L22,USP17L15,USP17L21,USP17L20,USP17L19,USP17L18,USP17L17,USP17L13,USP17L12,USP17L11,USP17L10,PRKN
	GO:0060491	regulation of cell projection assembly		0.0001176	0.4087	0.005174	0.04517	18	276	USP17L5,USP17L28,USP17L6P,USP17L9P,PRKCQ,CROCC,USP17L22,USP17L15,USP17L21,USP17L20,USP17L19,USP17L18,USP17L17,USP17L13,TBC1D3,USP17L12,USP17L11,USP17L10
	GO:0018960	4-nitrophenol metabolic process		0.0002094	0.7278	0.009098	0.07943	4	5	SULT1A2,SULT1A1,SULT1A3,SULT1A4
	GO:0032386	regulation of intracellular transport		0.0003408	1.185	0.01462	0.1277	22	431	COMMD1,UBE2L3,TCAF2,USP17L5,USP17L28,USP17L6P,USP17L9P,PRKCQ,USP17L22,USP17L15,USP17L21,TCAF1,USP17L20,USP17L19,USP17L18,USP17L17,USP17L13,IPO5,USP17L12,USP17L11,USP17L10,PRKN
	GO:0050877	nervous system process		0.00049	1.703	0.02077	0.1813	54	1858	OR2M7,OR2L3,OR2T33,OR2M2,OR4N4,OR4F3,OR2M5,OR2T12,CHRNA7,OR4M2B,OR1A1,OR1D5,NSUN5P2,OR1G1,OR4K15,OR4N2,OR4K2,OR4N5,OR4K17,OR11G2,OR4K13,OR4Q2,OR11H7,OR11H4,OR4M1,OR4Q3,CCL3L3,NSUN5,OR4M2,OR4K5,OR11H2,OR4F15,OR4F6,OR4F13P,OR10A7,OR2L5,OR1A2,BCR,OR2L2,OR4K1,JAM3,OTOA,DRD5,OR6C74,OR1D4,OR2L13,OR4K14,OR4L1,OR11H6,LINC02203,OR1D2,P2RX6,PRKN,OR4K3
	GO:0002697	regulation of immune effector process		0.0005086	1.768	0.0213	0.186	27	630	LGALS9C,DDX58,ATAD5,SEC14L1,PMS2,DEFB131A,SIGLEC16,USP17L5,USP17L28,USP17L6P,USP17L9P,SIGLEC11,USP17L22,USP17L15,USP17L21,USP17L20,USP17L19,BCR,USP17L18,USP17L17,EXOSC6,USP17L13,USP17L12,USP17L11,USP17L10,ZDHHC11,IGHV1OR15-1
	GO:0001819	positive regulation of cytokine production		0.0008179	2.843	0.03385	0.2955	26	606	LGALS9C,DDX58,SEC14L1,DEFB131A,RNF135,SIGLEC16,USP17L5,CCL4L2,USP17L28,CCL3L3,TRIM16,USP17L6P,USP17L9P,PRKCQ,USP17L22,USP17L15,USP17L21,USP17L20,USP17L19,USP17L18,USP17L17,TRIM16L,USP17L13,USP17L12,USP17L11,USP17L10
	GO:1902275	regulation of chromatin organization		0.00136	4.726	0.0556	0.4855	16	261	PARG,USP17L5,USP17L28,USP17L6P,USP17L9P,USP17L22,USP17L15,USP17L21,USP17L20,USP17L19,USP17L18,USP17L17,USP17L13,USP17L12,USP17L11,USP17L10
	GO:0002831	regulation of response to biotic stimulus		0.003824	13.29	0.1545	1.349	23	538	LGALS9C,USP18,DDX58,SEC14L1,RNF135,SIGLEC16,USP17L5,USP17L28,USP17L6P,USP17L9P,USP17L22,USP17L15,USP17L21,USP17L20,USP17L19,USP17L18,USP17L17,USP17L13,USP17L12,USP17L11,USP17L10,OTOP1,ZDHHC11
	GO:0002833	positive regulation of response to biotic stimulus		0.004275	14.86	0.1708	1.491	17	319	LGALS9C,SIGLEC16,USP17L5,USP17L28,USP17L6P,USP17L9P,USP17L22,USP17L15,USP17L21,USP17L20,USP17L19,USP17L18,USP17L17,USP17L13,USP17L12,USP17L11,USP17L10
	GO:1903792	negative regulation of anion transport		0.004457	15.49	0.1761	1.537	17	320	TCAF2,USP17L5,USP17L28,USP17L6P,USP17L9P,USP17L22,USP17L15,USP17L21,USP17L20,USP17L19,USP17L18,USP17L17,USP17L13,USP17L12,USP17L11,USP17L10,PRKN
	GO:0043085	positive regulation of catalytic activity		0.006412	22.29	0.2504	2.186	48	1713	LGALS9C,CHRNA7,UBE2L3,TBC1D3G,TBC1D3K,TBC1D3F,RGPD5,TBC1D3L,TBC1D3D,TBC1D28,USP17L5,CCL4L2,USP17L28,CCL3L3,TBC1D3C,TBC1D3B,USP17L6P,USP17L9P,PRKCQ,USP17L22,NCF1C,NCF1B,AGAP6,USP17L15,ADAP2,CAB39,USP17L21,USP17L20,USP17L19,BCR,USP17L18,USP17L17,TBC1D3I,RAB6A,USP17L13,TBC1D3E,RANBP2,DRD5,TBC1D3,AIMP2,TBC1D3H,USP17L12,USP17L11,USP17L10,RFPL1,TBC1D26,SPDYE7P,AGAP7P
	GO:1901750	leukotriene D4 biosynthetic process		0.008305	28.87	0.3172	2.77	4	10	GGTLC3,GGT1,GGT3P,GGT5
	GO:1901748	leukotriene D4 metabolic process		0.008305	28.87	0.3172	2.77	4	10	GGTLC3,GGT1,GGT3P,GGT5
	GO:0051336	regulation of hydrolase activity		0.01123	39.03	0.4243	3.705	44	1546	LGALS9C,ANXA8L1,TBC1D3G,TBC1D3K,TBC1D3F,RGPD5,TBC1D3L,TBC1D3D,TBC1D28,USP17L5,CCL4L2,USP17L28,CCL3L3,TBC1D3C,TBC1D3B,USP17L6P,USP17L9P,USP17L22,AGAP6,USP17L15,ADAP2,USP17L21,USP17L20,USP17L19,BCR,USP17L18,USP17L17,SIMC1,TBC1D3I,RAB6A,USP17L13,IPO5,TBC1D3E,RANBP2,DRD5,TBC1D3,TBC1D3H,USP17L12,USP17L11,ANXA8,USP17L10,RFPL1,TBC1D26,AGAP7P
	GO:0009712	catechol-containing compound metabolic process		0.01241	43.15	0.4591	4.008	8	75	CHRNA7,VPS35,SULT1A2,SULT1A1,SULT1A3,SULT1C3,SULT1A4,PRKN
	GO:0006584	catecholamine metabolic process		0.01241	43.15	0.4591	4.008	8	75	CHRNA7,VPS35,SULT1A2,SULT1A1,SULT1A3,SULT1C3,SULT1A4,PRKN
	GO:0006751	glutathione catabolic process		0.0129	44.85	0.4721	4.122	4	11	GGTLC3,GGT1,GGT3P,GGT5
	GO:0031347	regulation of defense response		0.01754	60.97	0.6351	5.545	30	897	LGALS9C,USP18,DDX58,CHRNA7,SEC14L1,RNF135,SIGLEC16,USP17L5,USP17L28,CCL3L3,VPS35,USP17L6P,USP17L9P,SIGLEC11,USP17L22,USP17L15,USP17L21,USP17L20,USP17L19,BCR,GGT1,GGT3P,USP17L18,USP17L17,USP17L13,USP17L12,USP17L11,USP17L10,OTOP1,ZDHHC11
	GO:0050427	3'-phosphoadenosine 5'-phosphosulfate metabolic process		0.02526	87.81	0.8869	7.744	5	25	SULT1A2,SULT1A1,SULT1A3,SULT1C3,SULT1A4
	GO:0034310	primary alcohol catabolic process		0.02526	87.81	0.8869	7.744	5	25	AKR1C3,SULT1A2,SULT1A1,SULT1A3,SULT1A4
	GO:0034035	purine ribonucleoside bisphosphate metabolic process		0.02526	87.81	0.8869	7.744	5	25	SULT1A2,SULT1A1,SULT1A3,SULT1C3,SULT1A4
	GO:0006691	leukotriene metabolic process		0.02895	100.6	1.006	8.787	6	42	GGTLC3,NCF1C,NCF1B,GGT1,GGT3P,GGT5
	GO:0010628	positive regulation of gene expression		0.03739	130	1.277	11.15	41	1471	LGALS9C,DDX58,ATAD5,NSUN5P2,SEC14L1,PMS2,DEFB131A,RNF135,SIGLEC16,USP17L5,CCL4L2,USP17L28,CCL3L3,TRIM16,NSUN5,VPS35,USP17L6P,USP17L9P,PRKCQ,EIF3C,USP17L22,USP17L15,USP17L21,USP17L20,HNRNPA1L2,USP17L19,USP17L18,EDAR,USP17L17,CFC1,EXOSC6,TRIM16L,USP17L13,USP17L12,USP17L11,TIMM23B,BAZ1B,USP17L10,EIF5AL1,PRKN,CFC1B
	GO:0051923	sulfation		0.03749	130.3	1.277	11.15	5	27	SULT1A2,SULT1A1,SULT1A3,SULT1C3,SULT1A4
	GO:0016570	histone modification		0.04113	143	1.388	12.12	21	540	SGF29,PARG,USP17L5,USP17L28,TRIM16,KANSL1,USP17L6P,USP17L9P,USP17L22,USP17L15,USP17L21,USP17L20,USP17L19,USP17L18,USP17L17,TRIM16L,USP17L13,USP17L12,USP17L11,BAZ1B,USP17L10
	GO:0045861	negative regulation of proteolysis		0.04531	157.5	1.515	13.22	18	422	ANXA8L1,USP17L5,USP17L28,USP17L6P,USP17L9P,USP17L22,USP17L15,USP17L21,USP17L20,USP17L19,USP17L18,USP17L17,SIMC1,USP17L13,USP17L12,USP17L11,ANXA8,USP17L10
	GO:0043271	negative regulation of ion transport		0.04979	173.1	1.648	14.39	19	465	COMMD1,TCAF2,USP17L5,USP17L28,USP17L6P,USP17L9P,USP17L22,USP17L15,CAB39,USP17L21,USP17L20,USP17L19,USP17L18,USP17L17,USP17L13,USP17L12,USP17L11,USP17L10,PRKN
	GO:0032103	positive regulation of response to external stimulus		0.05432	188.8	1.781	15.55	23	636	LGALS9C,DEFB131A,SIGLEC16,USP17L5,CCL4L2,USP17L28,CCL3L3,USP17L6P,USP17L9P,USP17L22,USP17L15,USP17L21,USP17L20,USP17L19,USP17L18,USP17L17,CFC1,USP17L13,USP17L12,USP17L11,USP17L10,OCM,CFC1B
	GO:0051051	negative regulation of transport		0.07202	250.3	2.34	20.43	23	648	LGALS9C,COMMD1,TCAF2,USP17L5,USP17L28,VPS35,USP17L6P,USP17L9P,USP17L22,USP17L15,CAB39,USP17L21,USP17L20,USP17L19,BCR,USP17L18,USP17L17,USP17L13,USP17L12,USP17L11,USP17L10,CORO1A,PRKN
	GO:0070201	regulation of establishment of protein localization		0.07699	267.6	2.478	21.63	25	740	COMMD1,UBE2L3,TRIM74,TCAF2,USP17L5,USP17L28,VPS35,USP17L6P,USP17L9P,PRKCQ,USP17L22,USP17L15,USP17L21,TCAF1,USP17L20,USP17L19,USP17L18,USP17L17,TRIM50,USP17L13,IPO5,USP17L12,USP17L11,USP17L10,PRKN
	GO:0072657	protein localization to membrane		0.07793	270.9	2.485	21.7	26	786	RPS15A,COMMD1,TCAF2,USP17L5,USP17L28,VPS35,USP17L6P,USP17L9P,USP17L22,NCF1C,NCF1B,USP17L15,USP17L21,TCAF1,USP17L20,GBP1,USP17L19,USP17L18,USP17L17,USP17L13,USP17L12,NSF,USP17L11,USP17L10,PRKN,ZDHHC11
	GO:1901565	organonitrogen compound catabolic process		0.09444	328.3	2.984	26.06	40	1482	USP18,NPEPPSP1,COMMD1,UBE2L3,GGTLC3,ANAPC1,ASAH2,USP17L24,PDXDC2P-NPIPB14P,USP17L5,USP17L28,VPS35,USP17L6P,UGGT2,USP17L9P,CTRB1,USP17L22,NCF1C,NCF1B,USP17L15,PRODH,USP17L21,USP17L20,USP17L19,GGT1,GGT3P,USP17L18,GGT5,SULT1A3,USP17L17,USP17L13,USP17L12,LONP2,NSF,USP17L11,USP17L10,RFPL1,SULT1A4,PRKN,ASAH2B
	GO:0043171	peptide catabolic process		0.1027	356.9	3.215	28.07	5	33	NPEPPSP1,GGTLC3,GGT1,GGT3P,GGT5
	GO:0009812	flavonoid metabolic process		0.1105	384	3.398	29.67	4	18	SULT1A2,SULT1A1,SULT1A3,SULT1A4
	GO:0006068	ethanol catabolic process		0.1105	384	3.398	29.67	4	18	SULT1A2,SULT1A1,SULT1A3,SULT1A4
	GO:0032101	regulation of response to external stimulus		0.1444	501.9	4.403	38.44	36	1306	LGALS9C,USP18,DDX58,CHRNA7,SEC14L1,DEFB131A,RNF135,SIGLEC16,USP17L5,CCL4L2,USP17L28,CCL3L3,VPS35,USP17L6P,USP17L9P,SIGLEC11,USP17L22,USP17L15,USP17L21,USP17L20,USP17L19,BCR,GGT1,GGT3P,USP17L18,USP17L17,CFC1,JAM3,USP17L13,USP17L12,USP17L11,USP17L10,OCM,OTOP1,CFC1B,ZDHHC11
	GO:0042219	cellular modified amino acid catabolic process		0.1574	547.2	4.759	41.55	5	36	GGTLC3,PRODH,GGT1,GGT3P,GGT5
	GO:0008210	estrogen metabolic process		0.1842	640.2	5.519	48.19	6	58	UGT2B7,SULT1A2,SULT1A1,SULT1A3,SULT1C3,SULT1A4
	GO:0070647	protein modification by small protein conjugation or removal		0.2057	715.1	6.112	53.36	34	1228	USP18,DDX58,MKRN1,HERC2P3,COMMD1,UBE2L3,ANAPC1,TRIM74,FBXW10,USP17L24,RNF135,USP17L5,USP17L28,USP17L6P,USP17L9P,USP17L22,USP17L15,RFPL2,USP17L21,USP17L20,USP17L19,USP17L18,POM121,USP17L17,TRIM50,USP17L13,RANBP2,AIMP2,USP17L12,USP17L11,USP17L10,RFPL1,TRIM52,PRKN
	GO:0019370	leukotriene biosynthetic process		0.2524	877.2	7.371	64.36	4	22	GGTLC3,GGT1,GGT3P,GGT5
	GO:0006067	ethanol metabolic process		0.2524	877.2	7.371	64.36	4	22	SULT1A2,SULT1A1,SULT1A3,SULT1A4
	GO:0051223	regulation of protein transport		0.2678	931	7.759	67.74	23	709	COMMD1,UBE2L3,TCAF2,USP17L5,USP17L28,VPS35,USP17L6P,USP17L9P,PRKCQ,USP17L22,USP17L15,USP17L21,TCAF1,USP17L20,USP17L19,USP17L18,USP17L17,USP17L13,IPO5,USP17L12,USP17L11,USP17L10,PRKN
	GO:0002252	immune effector process		0.3096	1000	8.895	77.66	39	1516	LGALS9C,DDX58,ATAD5,SEC14L1,PMS2,DEFB131A,RNF135,SIGLEC16,USP17L5,USP17L28,CCL3L3,USP17L6P,USP17L9P,SIGLEC11,IGLL1,USP17L22,NCF1C,NCF1B,USP17L15,CAB39,USP17L21,USP17L20,GBP1,USP17L19,BCR,USP17L18,USP17L17,EXOSC6,RAB6A,USP17L13,USP17L12,USP17L11,USP17L10,TRIM52,CORO1A,RNASE2,RNASE3,ZDHHC11,IGHV1OR15-1
	GO:0051346	negative regulation of hydrolase activity		0.3185	1000	9.074	79.23	19	537	ANXA8L1,USP17L5,USP17L28,USP17L6P,USP17L9P,USP17L22,USP17L15,USP17L21,USP17L20,USP17L19,USP17L18,USP17L17,SIMC1,USP17L13,IPO5,USP17L12,USP17L11,ANXA8,USP17L10
	GO:0006511	ubiquitin-dependent protein catabolic process		0.3924	1000	11.09	96.83	22	682	USP18,COMMD1,UBE2L3,ANAPC1,USP17L24,USP17L5,USP17L28,USP17L6P,USP17L9P,USP17L22,USP17L15,USP17L21,USP17L20,USP17L19,USP17L18,USP17L17,USP17L13,USP17L12,USP17L11,USP17L10,RFPL1,PRKN
	GO:0017085	response to insecticide		0.4218	1000	11.82	103.2	4	25	SULT1A2,SULT1A1,SULT1A3,SULT1A4
	GO:0019941	modification-dependent protein catabolic process		0.4331	1000	12.04	105.1	22	687	USP18,COMMD1,UBE2L3,ANAPC1,USP17L24,USP17L5,USP17L28,USP17L6P,USP17L9P,USP17L22,USP17L15,USP17L21,USP17L20,USP17L19,USP17L18,USP17L17,USP17L13,USP17L12,USP17L11,USP17L10,RFPL1,PRKN
	GO:0051603	proteolysis involved in cellular protein catabolic process		0.4741	1000	13.08	114.2	24	786	USP18,COMMD1,UBE2L3,ANAPC1,USP17L24,USP17L5,USP17L28,USP17L6P,UGGT2,USP17L9P,USP17L22,USP17L15,USP17L21,USP17L20,USP17L19,USP17L18,USP17L17,USP17L13,USP17L12,LONP2,USP17L11,USP17L10,RFPL1,PRKN
	GO:0098542	defense response to other organism		0.4935	1000	13.51	117.9	37	1446	LGALS9C,USP18,DDX58,SEC14L1,DEFB131A,RNF135,SIGLEC16,USP17L5,CCL4L2,USP17L28,CCL3L3,USP17L6P,USP17L9P,SIGLEC11,IGLL1,USP17L22,NCF1C,NCF1B,USP17L15,USP17L21,WFDC21P,USP17L20,GBP1,USP17L19,USP17L18,USP17L17,USP17L13,USP17L12,USP17L11,USP17L10,TRIM52,CORO1A,RNASE2,RNASE3,OTOP1,ZDHHC11,IGHV1OR15-1
	GO:0006576	cellular biogenic amine metabolic process		0.5453	1000	14.71	128.4	8	128	CHRNA7,VPS35,SULT1A2,SULT1A1,SULT1A3,SULT1C3,SULT1A4,PRKN
	GO:0043632	modification-dependent macromolecule catabolic process		0.5459	1000	14.71	128.4	22	699	USP18,COMMD1,UBE2L3,ANAPC1,USP17L24,USP17L5,USP17L28,USP17L6P,USP17L9P,USP17L22,USP17L15,USP17L21,USP17L20,USP17L19,USP17L18,USP17L17,USP17L13,USP17L12,USP17L11,USP17L10,RFPL1,PRKN
	GO:0099074	mitochondrion to lysosome transport		0.6157	1000	16.34	142.6	2	3	VPS35,PRKN
	GO:0099075	mitochondrion-derived vesicle mediated transport		0.6157	1000	16.34	142.6	2	3	VPS35,PRKN
	GO:0044257	cellular protein catabolic process		0.6675	1000	17.58	153.5	25	854	USP18,COMMD1,UBE2L3,ANAPC1,USP17L24,USP17L5,USP17L28,VPS35,USP17L6P,UGGT2,USP17L9P,USP17L22,USP17L15,USP17L21,USP17L20,USP17L19,USP17L18,USP17L17,USP17L13,USP17L12,LONP2,USP17L11,USP17L10,RFPL1,PRKN
	GO:0001817	regulation of cytokine production		0.681	1000	17.8	155.4	28	1004	LGALS9C,DDX58,CHRNA7,SEC14L1,DEFB131A,RNF135,SIGLEC16,USP17L5,CCL4L2,USP17L28,CCL3L3,TRIM16,USP17L6P,USP17L9P,PRKCQ,USP17L22,USP17L15,USP17L21,USP17L20,GBP1,USP17L19,USP17L18,USP17L17,TRIM16L,USP17L13,USP17L12,USP17L11,USP17L10
	GO:0090087	regulation of peptide transport		0.6884	1000	17.86	155.9	23	759	COMMD1,UBE2L3,TCAF2,USP17L5,USP17L28,VPS35,USP17L6P,USP17L9P,PRKCQ,USP17L22,USP17L15,USP17L21,TCAF1,USP17L20,USP17L19,USP17L18,USP17L17,USP17L13,IPO5,USP17L12,USP17L11,USP17L10,PRKN
	GO:1903351	cellular response to dopamine		0.7347	1000	18.92	165.2	7	103	OR11H7,OR11H4,VPS35,SULT1A3,DRD5,SULT1A4,PRKN
	GO:0140374	antiviral innate immune response		0.7623	1000	19.48	170.1	3	13	DDX58,RNF135,ZDHHC11
	GO:1903350	response to dopamine		0.7781	1000	19.74	172.4	7	104	OR11H7,OR11H4,VPS35,SULT1A3,DRD5,SULT1A4,PRKN
	GO:0001963	synaptic transmission, dopaminergic		0.8014	1000	20.19	176.2	6	76	CHRNA7,VPS35,SULT1A3,DRD5,SULT1A4,PRKN
	GO:0042417	dopamine metabolic process		0.8995	1000	22.49	196.4	5	52	CHRNA7,VPS35,SULT1A3,SULT1A4,PRKN
	GO:0006805	xenobiotic metabolic process		1.028	1000	25.53	222.9	8	141	UGT2B7,AKR1C3,GGT1,SULT1A2,SULT1A1,SULT1A3,SULT1C3,SULT1A4
	GO:0018958	phenol-containing compound metabolic process		1.178	1000	29.04	253.5	8	144	CHRNA7,VPS35,SULT1A2,SULT1A1,SULT1A3,SULT1C3,SULT1A4,PRKN
	GO:0070946	neutrophil-mediated killing of gram-positive bacterium		1.219	1000	29.23	255.2	2	4	NCF1C,NCF1B
	GO:1900138	negative regulation of phospholipase A2 activity		1.219	1000	29.23	255.2	2	4	ANXA8L1,ANXA8
	GO:0060460	left lung morphogenesis		1.219	1000	29.23	255.2	2	4	CFC1,CFC1B
	GO:1904431	positive regulation of t-circle formation		1.219	1000	29.23	255.2	2	4	SLX1B,SLX1A
	GO:0006508	proteolysis		1.392	1000	33.15	289.4	45	1975	LGALS9C,USP18,DDX58,ANXA8L1,NPEPPSP1,COMMD1,UBE2L3,GGTLC3,ANAPC1,ERO1B,USP17L24,USP17L5,PRSS33,USP17L28,VPS35,USP17L6P,UGGT2,USP17L9P,PRKCQ,CTRB1,USP17L22,USP17L15,USP17L21,USP17L20,AMZ1,USP17L19,PRSS40B,GGT1,GGT3P,USP17L18,GGT5,USP17L17,SIMC1,ADAMTS17,USP17L13,USP17L12,LONP2,USP17L11,TIMM23B,ANXA8,USP17L10,ADAMTSL3,RFPL1,PRKN,PRSS40A
	GO:0051129	negative regulation of cellular component organization		1.793	1000	42.39	370.1	25	917	SLX1B,USP17L5,USP17L28,VPS35,USP17L6P,USP17L9P,USP17L22,USP17L15,USP17L21,USP17L20,HNRNPA1L2,USP17L19,WASHC2A,USP17L18,USP17L17,SVIL,JAM3,SLX1A,USP17L13,USP17L12,USP17L11,USP17L10,SPECC1L,CORO1A,PRKN
	GO:0042403	thyroid hormone metabolic process		1.923	1000	45.16	394.3	4	37	SULT1A2,SULT1A1,SULT1A3,SULT1A4
	GO:0090008	hypoblast development		2.013	1000	46.34	404.6	2	5	CFC1,CFC1B
	GO:0072045	convergent extension involved in nephron morphogenesis		2.013	1000	46.34	404.6	2	5	CFC1,CFC1B
	GO:0060459	left lung development		2.013	1000	46.34	404.6	2	5	CFC1,CFC1B
	GO:0046456	icosanoid biosynthetic process		2.139	1000	48.74	425.5	5	63	GGTLC3,AKR1C3,GGT1,GGT3P,GGT5
	GO:0071868	cellular response to monoamine stimulus		2.162	1000	48.74	425.5	7	124	OR11H7,OR11H4,VPS35,SULT1A3,DRD5,SULT1A4,PRKN
	GO:0071870	cellular response to catecholamine stimulus		2.162	1000	48.74	425.5	7	124	OR11H7,OR11H4,VPS35,SULT1A3,DRD5,SULT1A4,PRKN
	GO:0080134	regulation of response to stress		2.181	1000	48.74	425.5	40	1738	LGALS9C,USP18,DDX58,ATAD5,CHRNA7,COMMD1,SEC14L1,PARG,RNF135,SIGLEC16,USP17L5,USP17L28,CCL3L3,VPS35,USP17L6P,USP17L9P,SIGLEC11,USP17L22,NCF1C,NCF1B,USP17L15,USP17L21,USP17L20,USP17L19,BCR,GGT1,GGT3P,USP17L18,POM121,EDAR,USP17L17,USP17L13,RANBP2,USP17L12,USP17L11,USP17L10,OCM,OTOP1,PRKN,ZDHHC11
	GO:0060341	regulation of cellular localization		2.187	1000	48.74	425.5	27	1034	LGALS9C,COMMD1,UBE2L3,TCAF2,USP17L5,USP17L28,VPS35,USP17L6P,USP17L9P,PRKCQ,CROCC,USP17L22,USP17L15,USP17L21,TCAF1,USP17L20,GBP1,USP17L19,USP17L18,USP17L17,USP17L13,IPO5,USP17L12,USP17L11,USP17L10,CORO1A,PRKN
GO: Cellular Component	GO:0000137	Golgi cis cisterna		0.0004584	0.1907	0.1907	1.26	7	33	GOLGA8IP,GOLGA8DP,GOLGA8N,GOLGA8CP,GOLGA8S,GOLGA8K,GOLGA8O
	GO:0005801	cis-Golgi network		0.1359	56.55	21.55	142.4	7	76	GOLGA8IP,GOLGA8DP,GOLGA8N,GOLGA8CP,GOLGA8S,GOLGA8K,GOLGA8O
	GO:0002177	manchette		0.1554	64.65	21.55	142.4	4	19	RIMBP3,RIMBP3B,RIMBP3C,MEIG1
	GO:0032580	Golgi cisterna membrane		0.576	239.6	45.34	299.6	7	96	GOLGA8IP,GOLGA8DP,GOLGA8N,GOLGA8CP,GOLGA8S,GOLGA8K,GOLGA8O
	GO:0033557	Slx1-Slx4 complex		0.6539	272	45.34	299.6	2	3	SLX1B,SLX1A
	GO:0099073	mitochondrion-derived vesicle		0.6539	272	45.34	299.6	2	3	VPS35,PRKN
Mouse Phenotype	MP:0008898	abnormal acrosome morphology		0.02188	40.57	20.68	167.6	8	118	PMS2,RIMBP3,RIMBP3B,GOLGA8N,RIMBP3C,JAM3,GOLGA8K,GOLGA8O
	MP:0009232	abnormal sperm nucleus morphology		0.02231	41.36	20.68	167.6	6	58	RIMBP3,RIMBP3B,GOLGA8N,RIMBP3C,GOLGA8K,GOLGA8O
	MP:0012119	increased trophectoderm apoptosis		0.0513	95.11	27.15	220	3	8	USP17L9P,USP17L15,USP17L13
	MP:0010443	total anomalous pulmonary venous connection, intracardiac		0.09837	182.4	27.15	220	2	2	CFC1,CFC1B
	MP:0020450	abnormal sperm progressive motility		0.1074	199.1	27.15	220	5	48	OR4M1,OR4M2,GOLGA8N,GOLGA8K,GOLGA8O
	MP:0020451	decreased sperm progressive motility		0.1074	199.1	27.15	220	5	48	OR4M1,OR4M2,GOLGA8N,GOLGA8K,GOLGA8O
	MP:0009377	ectopic manchette		0.1083	200.9	27.15	220	3	10	RIMBP3,RIMBP3B,RIMBP3C
	MP:0009230	abnormal sperm head morphology		0.1172	217.2	27.15	220	9	191	PMS2,RIMBP3,RIMBP3B,GOLGA8N,RIMBP3C,JAM3,MEIG1,GOLGA8K,GOLGA8O
	MP:0003694	failure of blastocyst to hatch from the zona pellucida		0.1439	266.8	29.64	240.2	5	51	ORC6,PARG,USP17L9P,USP17L15,USP17L13
	MP:0002687	oligozoospermia		0.2413	447.3	41.22	334	11	308	PMS2,RIMBP3,RIMBP3B,MEIKIN,GGT1,GGT3P,GOLGA8N,RIMBP3C,MEIG1,GOLGA8K,GOLGA8O
	MP:0003693	abnormal blastocyst hatching		0.2446	453.5	41.22	334	5	57	ORC6,PARG,USP17L9P,USP17L15,USP17L13
	MP:0010441	total anomalous pulmonary venous connection		0.2903	538.2	42.28	342.5	2	3	CFC1,CFC1B
	MP:0020869	immotile sperm		0.301	558.1	42.28	342.5	4	33	GOLGA8N,MEIG1,GOLGA8K,GOLGA8O
	MP:0014228	increased alveolar macrophage number		0.3192	591.9	42.28	342.5	3	14	GOLGA8N,GOLGA8K,GOLGA8O
	MP:0014227	abnormal alveolar macrophage number		0.3962	734.5	46.82	379.4	3	15	GOLGA8N,GOLGA8K,GOLGA8O
	MP:0002675	asthenozoospermia		0.4041	749.1	46.82	379.4	10	275	CHRNA7,OR4M1,OR4M2,USP17L9P,USP17L15,GOLGA8N,USP17L13,MEIG1,GOLGA8K,GOLGA8O
Domain	IPR000725	Olfact_rcpt	InterPro	9.268e-19	8.768e-16	8.768e-16	6.515e-15	39	393	OR2M7,OR2L3,OR2T33,OR2M2,OR4N4,OR4F3,OR2M5,OR2T12,OR1A1,OR1D5,OR1G1,OR4K15,OR4N2,OR4K2,OR4N5,OR4K17,OR11G2,OR4K13,OR11H4,OR4M1,OR4Q3,OR4M2,OR4K5,OR11H2,OR4F15,OR4F6,OR4F13P,OR10A7,OR2L5,OR1A2,OR2L2,OR4K1,OR6C74,OR1D4,OR2L13,OR4K14,OR4L1,OR11H6,OR1D2
	PF04774	HABP4_PAI-RBP1	Pfam	1.7e-14	1.608e-11	5.36e-12	3.983e-11	11	16	USP17L24,USP17L5,USP17L22,USP17L21,USP17L20,USP17L19,USP17L18,USP17L17,USP17L13,USP17L12,USP17L11
	IPR006861	HABP4_PAIRBP1-bd	InterPro	1.7e-14	1.608e-11	5.36e-12	3.983e-11	11	16	USP17L24,USP17L5,USP17L22,USP17L21,USP17L20,USP17L19,USP17L18,USP17L17,USP17L13,USP17L12,USP17L11
	PS50262	G_PROTEIN_RECEP_F1_2	PROSITE	3.173e-13	3.002e-10	6.324e-11	4.699e-10	43	691	OR2M7,OR2L3,OR2T33,OR2M2,OR4N4,OR4F3,OR2M5,OR2T12,GPR142,OR1A1,OR1D5,OR1G1,OR4K15,VN1R3,OR4N2,OR4K2,OR4N5,OR4K17,OR11G2,OR4K13,OR11H4,OR4M1,OR4Q3,OR4M2,NPY4R,OR4K5,OR11H2,OR4F15,OR4F6,OR4F13P,OR10A7,OR2L5,OR1A2,OR2L2,OR4K1,DRD5,OR6C74,OR1D4,OR2L13,OR4K14,OR4L1,OR11H6,OR1D2
	IPR000276	GPCR_Rhodpsn	InterPro	3.342e-13	3.162e-10	6.324e-11	4.699e-10	43	692	OR2M7,OR2L3,OR2T33,OR2M2,OR4N4,OR4F3,OR2M5,OR2T12,GPR142,OR1A1,OR1D5,OR1G1,OR4K15,VN1R3,OR4N2,OR4K2,OR4N5,OR4K17,OR11G2,OR4K13,OR11H4,OR4M1,OR4Q3,OR4M2,NPY4R,OR4K5,OR11H2,OR4F15,OR4F6,OR4F13P,OR10A7,OR2L5,OR1A2,OR2L2,OR4K1,DRD5,OR6C74,OR1D4,OR2L13,OR4K14,OR4L1,OR11H6,OR1D2
	PS00237	G_PROTEIN_RECEP_F1_1	PROSITE	1.232e-12	1.166e-09	1.943e-10	1.444e-09	42	685	OR2M7,OR2L3,OR2T33,OR2M2,OR4N4,OR4F3,OR2M5,OR2T12,GPR142,OR1A1,OR1D5,OR1G1,OR4K15,VN1R3,OR4N2,OR4K2,OR4N5,OR4K17,OR11G2,OR4K13,OR11H4,OR4M1,OR4Q3,OR4M2,NPY4R,OR4K5,OR4F15,OR4F6,OR4F13P,OR10A7,OR2L5,OR1A2,OR2L2,OR4K1,DRD5,OR6C74,OR1D4,OR2L13,OR4K14,OR4L1,OR11H6,OR1D2
	IPR017452	GPCR_Rhodpsn_7TM	InterPro	3e-12	2.838e-09	4.054e-10	3.012e-09	41	670	OR2M7,OR2L3,OR2T33,OR2M2,OR4N4,OR4F3,OR2M5,OR2T12,GPR142,OR1A1,OR1D5,OR1G1,OR4K15,OR4N2,OR4K2,OR4N5,OR4K17,OR11G2,OR4K13,OR11H4,OR4M1,OR4Q3,OR4M2,NPY4R,OR4K5,OR11H2,OR4F15,OR4F6,OR4F13P,OR10A7,OR2L5,OR1A2,OR2L2,OR4K1,DRD5,OR6C74,OR2L13,OR4K14,OR4L1,OR11H6,OR1D2
	PF00001	7tm_1	Pfam	4.272e-12	4.041e-09	5.052e-10	3.753e-09	41	677	OR2M7,OR2L3,OR2T33,OR2M2,OR4N4,OR4F3,OR2M5,OR2T12,GPR142,OR1A1,OR1D5,OR1G1,OR4K15,OR4N2,OR4K2,OR4N5,OR4K17,OR11G2,OR4K13,OR11H4,OR4M1,OR4Q3,OR4M2,NPY4R,OR4K5,OR4F15,OR4F6,OR4F13P,OR10A7,OR2L5,OR1A2,OR2L2,OR4K1,DRD5,OR6C74,OR1D4,OR2L13,OR4K14,OR4L1,OR11H6,OR1D2
	IPR000195	Rab-GTPase-TBC_dom	InterPro	6.609e-10	6.252e-07	6.252e-08	4.645e-07	13	55	TBC1D3G,TBC1D3K,TBC1D3F,TBC1D3L,TBC1D3D,TBC1D28,TBC1D3C,TBC1D3B,TBC1D29P,TBC1D3I,TBC1D3E,TBC1D3H,TBC1D26
	PS50086	TBC_RABGAP	PROSITE	6.609e-10	6.252e-07	6.252e-08	4.645e-07	13	55	TBC1D3G,TBC1D3K,TBC1D3F,TBC1D3L,TBC1D3D,TBC1D28,TBC1D3C,TBC1D3B,TBC1D29P,TBC1D3I,TBC1D3E,TBC1D3H,TBC1D26
	IPR018200	USP_CS	InterPro	8.098e-09	7.66e-06	6.964e-07	5.174e-06	13	66	USP18,USP17L24,USP17L5,USP17L22,USP17L21,USP17L20,USP17L19,USP17L18,USP17L17,USP17L13,USP17L12,USP17L11,USP17L10
	PF00566	RabGAP-TBC	Pfam	9.018e-09	8.531e-06	7.109e-07	5.282e-06	12	53	TBC1D3G,TBC1D3K,TBC1D3F,TBC1D3L,TBC1D3D,TBC1D28,TBC1D3C,TBC1D3B,TBC1D3I,TBC1D3E,TBC1D3H,TBC1D26
	PS00972	USP_1	PROSITE	1.786e-08	1.69e-05	1.3e-06	9.659e-06	13	70	USP18,USP17L24,USP17L5,USP17L22,USP17L21,USP17L20,USP17L19,USP17L18,USP17L17,USP17L13,USP17L12,USP17L11,USP17L10
	PF00443	UCH	Pfam	2.159e-08	2.043e-05	1.362e-06	1.012e-05	13	71	USP18,USP17L24,USP17L5,USP17L22,USP17L21,USP17L20,USP17L19,USP17L18,USP17L17,USP17L13,USP17L12,USP17L11,USP17L10
	PS00973	USP_2	PROSITE	2.159e-08	2.043e-05	1.362e-06	1.012e-05	13	71	USP18,USP17L24,USP17L5,USP17L22,USP17L21,USP17L20,USP17L19,USP17L18,USP17L17,USP17L13,USP17L12,USP17L11,USP17L10
	PS50235	USP_3	PROSITE	2.602e-08	2.461e-05	1.367e-06	1.016e-05	13	72	USP18,USP17L24,USP17L5,USP17L22,USP17L21,USP17L20,USP17L19,USP17L18,USP17L17,USP17L13,USP17L12,USP17L11,USP17L10
	IPR028889	USP_dom	InterPro	2.602e-08	2.461e-05	1.367e-06	1.016e-05	13	72	USP18,USP17L24,USP17L5,USP17L22,USP17L21,USP17L20,USP17L19,USP17L18,USP17L17,USP17L13,USP17L12,USP17L11,USP17L10
	IPR001394	Peptidase_C19_UCH	InterPro	2.602e-08	2.461e-05	1.367e-06	1.016e-05	13	72	USP18,USP17L24,USP17L5,USP17L22,USP17L21,USP17L20,USP17L19,USP17L18,USP17L17,USP17L13,USP17L12,USP17L11,USP17L10
	SM00164	TBC	SMART	7.472e-08	7.068e-05	3.72e-06	2.764e-05	11	49	TBC1D3G,TBC1D3K,TBC1D3F,TBC1D3L,TBC1D3D,TBC1D3C,TBC1D3B,TBC1D3I,TBC1D3E,TBC1D3H,TBC1D26
	IPR026737	GOLGA6L	InterPro	3.411e-06	0.003226	0.0001613	0.001199	5	6	GOLGA6L2,GOLGA6L4,GOLGA6L6,GOLGA6L10,GOLGA6L9
	PF15070	GOLGA2L5	Pfam	0.0001297	0.1227	0.005575	0.04142	6	18	GOLGA6L2,GOLGA6L4,GOLGA8N,GOLGA6L10,GOLGA6L9,GOLGA8O
	IPR024858	Golgin_A	InterPro	0.0001297	0.1227	0.005575	0.04142	6	18	GOLGA6L2,GOLGA6L4,GOLGA8N,GOLGA6L10,GOLGA6L9,GOLGA8O
	IPR009443	NPIP	InterPro	0.001036	0.98	0.04261	0.3166	5	14	NPIPB5,NPIPB9,NPIPB3,NPIPB8,NPIPB13
	PF05832	DUF846	Pfam	0.01143	10.82	0.4326	3.214	3	4	TVP23C-CDRT4,TVP23C,TVP23B
	IPR008564	DUF846_euk	InterPro	0.01143	10.82	0.4326	3.214	3	4	TVP23C-CDRT4,TVP23C,TVP23B
	SM00589	PRY	SMART	0.05982	56.59	2.096	15.57	6	48	RNF135,TRIM16,RFPL2,TRIM50,TRIM16L,RFPL1
	IPR006574	PRY	InterPro	0.05982	56.59	2.096	15.57	6	48	RNF135,TRIM16,RFPL2,TRIM50,TRIM16L,RFPL1
	IPR000101	GGT_peptidase	InterPro	0.09689	91.66	3.055	22.7	3	7	GGT1,GGT3P,GGT5
	PF01019	G_glu_transpept	Pfam	0.09689	91.66	3.055	22.7	3	7	GGT1,GGT3P,GGT5
	PS00462	G_GLU_TRANSPEPTIDASE	PROSITE	0.09689	91.66	3.055	22.7	3	7	GGT1,GGT3P,GGT5
	PF00685	Sulfotransfer_1	Pfam	0.1508	142.7	4.248	31.56	5	36	SULT1A2,SULT1A1,SULT1A3,SULT1C3,SULT1A4
	IPR000863	Sulfotransferase_dom	InterPro	0.1508	142.7	4.248	31.56	5	36	SULT1A2,SULT1A1,SULT1A3,SULT1C3,SULT1A4
	IPR001678	MeTrfase_RsmB/NOP2	InterPro	0.1534	145.1	4.248	31.56	3	8	NSUN5P2,NSUN5,NSUN6
	PF01189	Methyltr_RsmB-F	Pfam	0.1534	145.1	4.248	31.56	3	8	NSUN5P2,NSUN5,NSUN6
	PF17048	Ceramidse_alk_C	Pfam	0.2066	195.4	4.248	31.56	2	2	ASAH2,ASAH2B
	IPR009115	AnnexinVIII	InterPro	0.2066	195.4	4.248	31.56	2	2	ANXA8L1,ANXA8
	SM01276	M60-like	SMART	0.2066	195.4	4.248	31.56	2	2	TCAF2,TCAF1
	PF08217	DUF1712	Pfam	0.2066	195.4	4.248	31.56	2	2	CCZ1,CCZ1B
	IPR031161	Peptidase_M60_dom	InterPro	0.2066	195.4	4.248	31.56	2	2	TCAF2,TCAF1
	PF15194	TMEM191C	Pfam	0.2066	195.4	4.248	31.56	2	2	TMEM191B,TMEM191C
	PF13402	Peptidase_M60	Pfam	0.2066	195.4	4.248	31.56	2	2	TCAF2,TCAF1
	IPR028186	TMEM191B/C	InterPro	0.2066	195.4	4.248	31.56	2	2	TMEM191B,TMEM191C
	IPR031331	NEUT/ALK_ceramidase_C	InterPro	0.2066	195.4	4.248	31.56	2	2	ASAH2,ASAH2B
	IPR013176	DUF1712_fun	InterPro	0.2066	195.4	4.248	31.56	2	2	CCZ1,CCZ1B
	IPR006823	Ceramidase_alk	InterPro	0.2066	195.4	4.248	31.56	2	2	ASAH2,ASAH2B
	PS51723	PEPTIDASE_M60	PROSITE	0.2066	195.4	4.248	31.56	2	2	TCAF2,TCAF1
	PF13765	PRY	Pfam	0.3174	300.2	6.388	47.46	5	42	TRIM16,RFPL2,TRIM50,TRIM16L,RFPL1
	IPR003879	Butyrophylin	InterPro	0.4918	465.3	9.693	72.02	6	70	RNF135,TRIM16,RFPL2,TRIM50,TRIM16L,RFPL1
	PF09443	CFC	Pfam	0.605	572.4	11.45	85.05	2	3	CFC1,CFC1B
	IPR019011	Cryptic/Cripto_CFC-dom	InterPro	0.605	572.4	11.45	85.05	2	3	CFC1,CFC1B
	PF01722	BolA	Pfam	1.199	1000	19.89	147.8	2	4	BOLA2B,BOLA2
	IPR029423	LRRC37AB_C	InterPro	1.199	1000	19.89	147.8	2	4	LRRC37A2,LRRC37A
	PF14914	LRRC37AB_C	Pfam	1.199	1000	19.89	147.8	2	4	LRRC37A2,LRRC37A
	IPR002634	BolA	InterPro	1.199	1000	19.89	147.8	2	4	BOLA2B,BOLA2
	IPR032754	LRRC37_N	InterPro	1.199	1000	19.89	147.8	2	4	LRRC37A2,LRRC37A
	PF15779	LRRC37	Pfam	1.199	1000	19.89	147.8	2	4	LRRC37A2,LRRC37A
	IPR015753	LRRC37A/B-like	InterPro	1.199	1000	19.89	147.8	2	4	LRRC37A2,LRRC37A
	IPR004001	Actin_CS	InterPro	1.409	1000	22.98	170.8	3	16	POTEF,POTEJ,POTEI
	SM00449	SPRY	SMART	1.549	1000	24.83	184.5	6	87	RNF135,TRIM16,RFPL2,TRIM50,TRIM16L,RFPL1
	PS00432	ACTINS_2	PROSITE	1.693	1000	26.7	198.4	3	17	POTEF,POTEJ,POTEI
	IPR022723	RDM_domain_RFPL	InterPro	1.979	1000	30.19	224.3	2	5	RFPL2,RFPL1
	PF11002	RDM	Pfam	1.979	1000	30.19	224.3	2	5	RFPL2,RFPL1
	IPR020902	Actin/actin-like_CS	InterPro	2.01	1000	30.19	224.3	3	18	POTEF,POTEJ,POTEI
	PF00622	SPRY	Pfam	2.299	1000	33.45	248.6	6	94	RNF135,TRIM16,RFPL2,TRIM50,TRIM16L,RFPL1
	IPR003877	SPRY_dom	InterPro	2.299	1000	33.45	248.6	6	94	RNF135,TRIM16,RFPL2,TRIM50,TRIM16L,RFPL1
	PS01132	ACTINS_ACT_LIKE	PROSITE	2.362	1000	33.73	250.6	3	19	POTEF,POTEJ,POTEI
	IPR001870	B30.2/SPRY	InterPro	2.425	1000	33.73	250.6	6	95	RNF135,TRIM16,RFPL2,TRIM50,TRIM16L,RFPL1
	PS50188	B302_SPRY	PROSITE	2.425	1000	33.73	250.6	6	95	RNF135,TRIM16,RFPL2,TRIM50,TRIM16L,RFPL1
	PS01153	NOL1_NOP2_SUN	PROSITE	2.94	1000	39.73	295.2	2	6	NSUN5,NSUN6
	IPR023267	RCMT	InterPro	2.94	1000	39.73	295.2	2	6	NSUN5,NSUN6
	SM00248	ANK	SMART	3.394	1000	45.23	336	10	251	POTEF,ANKRD19P,POTEJ,AGAP6,POTEB3,POTEB2,POTEB,ANKRD62,POTEI,AGAP7P
	PS50088	ANK_REPEAT	PROSITE	3.591	1000	47.18	350.5	10	253	POTEF,ANKRD19P,POTEJ,AGAP6,POTEB3,POTEB2,POTEB,ANKRD62,POTEI,AGAP7P
	PS50297	ANK_REP_REGION	PROSITE	3.692	1000	47.84	355.5	10	254	POTEF,ANKRD19P,POTEJ,AGAP6,POTEB3,POTEB2,POTEB,ANKRD62,POTEI,AGAP7P
Pathway	1269583	Olfactory Signaling Pathway	BioSystems: REACTOME	3.354e-21	2.633e-18	2.633e-18	1.907e-17	42	435	OR2M7,OR2L3,OR2T33,OR2M2,OR4N4,OR4F3,OR2M5,OR2T12,OR1A1,OR1D5,OR1G1,OR4K15,OR4N4C,OR4N2,OR4K2,OR4N5,OR4K17,OR11G2,OR4K13,OR4Q2,OR11H7,OR11H4,OR4M1,OR4Q3,OR4M2,OR4K5,OR11H2,OR4F15,OR4F6,OR10A7,OR2L5,OR1A2,OR2L2,OR4K1,OR6C74,OR1D4,OR2L13,OR4K14,OR4L1,OR11H6,OR1D2,OR4K3
	M14091	Olfactory transduction	MSigDB C2 BIOCARTA (v7.5.1)	3.943e-17	3.096e-14	1.439e-14	1.043e-13	36	389	OR2M7,OR2L3,OR2T33,OR2M2,OR4N4,OR4F3,OR2M5,OR2T12,OR1A1,OR1D5,OR1G1,OR4K15,OR4N2,OR4K2,OR4N5,OR4K17,OR11G2,OR4K13,OR11H4,OR4M1,OR4Q3,OR4M2,OR4K5,OR4F15,OR4F6,OR10A7,OR1A2,OR2L2,OR4K1,OR6C74,OR1D4,OR2L13,OR4K14,OR4L1,OR11H6,OR1D2
	83087	Olfactory transduction	BioSystems: KEGG	5.501e-17	4.318e-14	1.439e-14	1.043e-13	37	419	OR2M7,OR2L3,OR2T33,OR2M2,OR4N4,OR4F3,OR2M5,OR2T12,OR1A1,OR1D5,OR1G1,OR4K15,OR4N4C,OR4N2,OR4K2,OR4N5,OR4K17,OR11G2,OR4K13,OR11H4,OR4M1,OR4Q3,OR4M2,OR4K5,OR4F15,OR4F6,OR10A7,OR2L5,OR1A2,OR2L2,OR4K1,OR6C74,OR2L13,OR4K14,OR4L1,OR11H6,OR1D2
	1269574	GPCR downstream signaling	BioSystems: REACTOME	1.018e-09	7.992e-07	1.998e-07	1.447e-06	45	1019	OR2M7,OR2L3,OR2T33,OR2M2,OR4N4,OR4F3,OR2M5,OR2T12,OR1A1,OR1D5,OR1G1,OR4K15,OR4N4C,OR4N2,OR4K2,OR4N5,OR4K17,OR11G2,OR4K13,OR4Q2,OR11H7,OR11H4,OR4M1,OR4Q3,OR4M2,NPY4R,PRKCQ,OR4K5,OR11H2,OR4F15,OR4F6,OR10A7,OR2L5,OR1A2,OR2L2,OR4K1,DRD5,OR6C74,OR1D4,OR2L13,OR4K14,OR4L1,OR11H6,OR1D2,OR4K3
	1427862	Ub-specific processing proteases	BioSystems: REACTOME	3.186e-09	2.501e-06	5.002e-07	3.623e-06	21	223	USP18,DDX58,USP17L26,USP17L24,USP17L25,USP17L27,USP17L5,USP17L28,USP17L29,USP17L30,USP17L22,USP17L15,USP17L21,USP17L20,USP17L19,USP17L18,USP17L17,USP17L13,USP17L12,USP17L11,USP17L10
	1427860	Deubiquitination	BioSystems: REACTOME	2.124e-08	1.667e-05	2.779e-06	2.013e-05	23	301	USP18,DDX58,USP17L26,USP17L24,RNF135,USP17L25,USP17L27,USP17L5,USP17L28,USP17L29,USP17L30,USP17L22,USP17L15,USP17L21,USP17L20,USP17L19,USP17L18,USP17L17,USP17L13,USP17L12,USP17L11,USP17L10,PRKN
	1269543	Signaling by GPCR	BioSystems: REACTOME	9.422e-06	0.007397	0.001057	0.007654	45	1345	OR2M7,OR2L3,OR2T33,OR2M2,OR4N4,OR4F3,OR2M5,OR2T12,OR1A1,OR1D5,OR1G1,OR4K15,OR4N4C,OR4N2,OR4K2,OR4N5,OR4K17,OR11G2,OR4K13,OR4Q2,OR11H7,OR11H4,OR4M1,OR4Q3,OR4M2,NPY4R,PRKCQ,OR4K5,OR11H2,OR4F15,OR4F6,OR10A7,OR2L5,OR1A2,OR2L2,OR4K1,DRD5,OR6C74,OR1D4,OR2L13,OR4K14,OR4L1,OR11H6,OR1D2,OR4K3
	M39483	Sulfation biotransformation reaction	MSigDB C2 BIOCARTA (v7.5.1)	9.739e-05	0.07645	0.009556	0.06922	6	18	SULT1A2,SULT1A1,SULT1C3,SLX1B-SULT1A4,SLX1A-SULT1A3,SULT1A4
	1268701	Post-translational protein modification	BioSystems: REACTOME	0.003962	3.111	0.3456	2.503	33	1037	USP18,DDX58,UBE2L3,USP17L26,USP17L24,RNF135,USP17L25,USP17L27,USP17L5,USP17L28,USP17L29,USP17L30,UGGT2,USP17L22,USP17L15,USP17L21,USP17L20,USP17L19,USP17L18,POM121,USP17L17,ADAMTS17,RAB6A,USP17L13,OTOA,RANBP2,USP17L12,NSF,USP17L11,USP17L10,ADAMTSL3,OPCML,PRKN
	M18256	Sulfur metabolism	MSigDB C2 BIOCARTA (v7.5.1)	0.02194	17.22	1.722	12.47	4	13	SULT1A2,SULT1A1,SULT1A3,SULT1A4
	M39787	22q11.2 copy number variation syndrome	MSigDB C2 BIOCARTA (v7.5.1)	0.0774	60.76	5.524	40.01	9	131	TUBA3FP,SLC7A4,PRODH,LRRC74B,FAM230E,DGCR5,P2RX6,PRKN,POM121L15P
	1268677	Metabolism of proteins	BioSystems: REACTOME	0.1391	109.2	9.098	65.9	40	1624	USP18,DDX58,RPS15A,UBE2L3,FBXW10,ERO1B,USP17L26,USP17L24,RNF135,USP17L25,USP17L27,USP17L5,USP17L28,USP17L29,USP17L30,UGGT2,EIF3C,USP17L22,USP17L15,USP17L21,USP17L20,USP17L19,USP17L18,POM121,SULT1A3,USP17L17,EXOSC6,ADAMTS17,RAB6A,USP17L13,OTOA,RANBP2,USP17L12,LONP2,NSF,USP17L11,USP17L10,ADAMTSL3,OPCML,PRKN
	M39588	Metapathway biotransformation Phase I and II	MSigDB C2 BIOCARTA (v7.5.1)	0.229	179.8	13.83	100.2	10	185	UGT2B7,CYP4Z1,AKR1C3,HS6ST3,SULT1A2,SULT1A1,SULT1C3,SLX1B-SULT1A4,SLX1A-SULT1A3,SULT1A4
	PW:0000078	cyanoamino acid metabolic	Pathway Ontology	0.5524	433.7	30.98	224.4	2	3	GGT1,GGT5
	1270207	Phase II conjugation	BioSystems: REACTOME	0.6944	545.1	36.34	263.2	7	108	UGT2B7,GGT1,GGT3P,GGT5,SULT1A2,SULT1A1,SULT1A3
	673221	Chemical carcinogenesis	BioSystems: KEGG	0.8906	699.1	43.7	316.5	6	82	CHRNA7,UGT2B7,SULT1A2,SULT1A1,SULT1A3,SULT1A4
Pubmed	20403174	The DUB/USP17 deubiquitinating enzymes: a gene family within a tandemly repeated sequence, is also embedded within the copy number variable beta-defensin cluster.	Pubmed	2.779e-29	3.076e-25	2.796e-26	2.765e-25	21	34	USP17L26,USP17L24,USP17L25,USP17L27,USP17L5,USP17L28,USP17L29,USP17L30,USP17L6P,USP17L9P,USP17L22,USP17L15,USP17L21,USP17L20,USP17L19,USP17L18,USP17L17,USP17L13,USP17L12,USP17L11,USP17L10
	17109758	Hyaluronan- and RNA-binding deubiquitinating enzymes of USP17 family members associated with cell viability.	Pubmed	2.779e-29	3.076e-25	2.796e-26	2.765e-25	21	34	USP17L26,USP17L24,USP17L25,USP17L27,USP17L5,USP17L28,USP17L29,USP17L30,USP17L6P,USP17L9P,USP17L22,USP17L15,USP17L21,USP17L20,USP17L19,USP17L18,USP17L17,USP17L13,USP17L12,USP17L11,USP17L10
	20388806	The deubiquitinating enzyme USP17 is highly expressed in tumor biopsies, is cell cycle regulated, and is required for G1-S progression.	Pubmed	2.779e-29	3.076e-25	2.796e-26	2.765e-25	21	34	USP17L26,USP17L24,USP17L25,USP17L27,USP17L5,USP17L28,USP17L29,USP17L30,USP17L6P,USP17L9P,USP17L22,USP17L15,USP17L21,USP17L20,USP17L19,USP17L18,USP17L17,USP17L13,USP17L12,USP17L11,USP17L10
	14699124	DUB-3, a cytokine-inducible deubiquitinating enzyme that blocks proliferation.	Pubmed	2.779e-29	3.076e-25	2.796e-26	2.765e-25	21	34	USP17L26,USP17L24,USP17L25,USP17L27,USP17L5,USP17L28,USP17L29,USP17L30,USP17L6P,USP17L9P,USP17L22,USP17L15,USP17L21,USP17L20,USP17L19,USP17L18,USP17L17,USP17L13,USP17L12,USP17L11,USP17L10
	20715989	Polyclonal and monoclonal antibodies specific for USP17, a proapoptotic deubiquitinating enzyme.	Pubmed	2.779e-29	3.076e-25	2.796e-26	2.765e-25	21	34	USP17L26,USP17L24,USP17L25,USP17L27,USP17L5,USP17L28,USP17L29,USP17L30,USP17L6P,USP17L9P,USP17L22,USP17L15,USP17L21,USP17L20,USP17L19,USP17L18,USP17L17,USP17L13,USP17L12,USP17L11,USP17L10
	9806828	Human megasatellite DNA RS447: copy-number polymorphisms and interspecies conservation.	Pubmed	2.779e-29	3.076e-25	2.796e-26	2.765e-25	21	34	USP17L26,USP17L24,USP17L25,USP17L27,USP17L5,USP17L28,USP17L29,USP17L30,USP17L6P,USP17L9P,USP17L22,USP17L15,USP17L21,USP17L20,USP17L19,USP17L18,USP17L17,USP17L13,USP17L12,USP17L11,USP17L10
	20368735	The ubiquitin-specific protease 17 is involved in virus-triggered type I IFN signaling.	Pubmed	2.779e-29	3.076e-25	2.796e-26	2.765e-25	21	34	USP17L26,USP17L24,USP17L25,USP17L27,USP17L5,USP17L28,USP17L29,USP17L30,USP17L6P,USP17L9P,USP17L22,USP17L15,USP17L21,USP17L20,USP17L19,USP17L18,USP17L17,USP17L13,USP17L12,USP17L11,USP17L10
	15780755	The DUB/USP17 deubiquitinating enzymes, a multigene family within a tandemly repeated sequence.	Pubmed	2.779e-29	3.076e-25	2.796e-26	2.765e-25	21	34	USP17L26,USP17L24,USP17L25,USP17L27,USP17L5,USP17L28,USP17L29,USP17L30,USP17L6P,USP17L9P,USP17L22,USP17L15,USP17L21,USP17L20,USP17L19,USP17L18,USP17L17,USP17L13,USP17L12,USP17L11,USP17L10
	11941478	Unstable transmission of the RS447 human megasatellite tandem repetitive sequence that contains the USP17 deubiquitinating enzyme gene.	Pubmed	2.779e-29	3.076e-25	2.796e-26	2.765e-25	21	34	USP17L26,USP17L24,USP17L25,USP17L27,USP17L5,USP17L28,USP17L29,USP17L30,USP17L6P,USP17L9P,USP17L22,USP17L15,USP17L21,USP17L20,USP17L19,USP17L18,USP17L17,USP17L13,USP17L12,USP17L11,USP17L10
	10936051	The RS447 human megasatellite tandem repetitive sequence encodes a novel deubiquitinating enzyme with a functional promoter.	Pubmed	2.779e-29	3.076e-25	2.796e-26	2.765e-25	21	34	USP17L26,USP17L24,USP17L25,USP17L27,USP17L5,USP17L28,USP17L29,USP17L30,USP17L6P,USP17L9P,USP17L22,USP17L15,USP17L21,USP17L20,USP17L19,USP17L18,USP17L17,USP17L13,USP17L12,USP17L11,USP17L10
	21448158	The deubiquitinating enzyme USP17 is essential for GTPase subcellular localization and cell motility.	Pubmed	2.779e-29	3.076e-25	2.796e-26	2.765e-25	21	34	USP17L26,USP17L24,USP17L25,USP17L27,USP17L5,USP17L28,USP17L29,USP17L30,USP17L6P,USP17L9P,USP17L22,USP17L15,USP17L21,USP17L20,USP17L19,USP17L18,USP17L17,USP17L13,USP17L12,USP17L11,USP17L10
	16611142	Cytokine-regulated protein degradation by the ubiquitination system.	Pubmed	6.871e-29	7.604e-25	5.849e-26	5.784e-25	21	35	USP17L26,USP17L24,USP17L25,USP17L27,USP17L5,USP17L28,USP17L29,USP17L30,USP17L6P,USP17L9P,USP17L22,USP17L15,USP17L21,USP17L20,USP17L19,USP17L18,USP17L17,USP17L13,USP17L12,USP17L11,USP17L10
	21239494	Lys-63-specific deubiquitination of SDS3 by USP17 regulates HDAC activity.	Pubmed	6.871e-29	7.604e-25	5.849e-26	5.784e-25	21	35	USP17L26,USP17L24,USP17L25,USP17L27,USP17L5,USP17L28,USP17L29,USP17L30,USP17L6P,USP17L9P,USP17L22,USP17L15,USP17L21,USP17L20,USP17L19,USP17L18,USP17L17,USP17L13,USP17L12,USP17L11,USP17L10
	20147298	The deubiquitinating enzyme USP17 blocks N-Ras membrane trafficking and activation but leaves K-Ras unaffected.	Pubmed	1.631e-28	1.805e-24	1.289e-25	1.275e-24	21	36	USP17L26,USP17L24,USP17L25,USP17L27,USP17L5,USP17L28,USP17L29,USP17L30,USP17L6P,USP17L9P,USP17L22,USP17L15,USP17L21,USP17L20,USP17L19,USP17L18,USP17L17,USP17L13,USP17L12,USP17L11,USP17L10
	20228807	Cdc25A and Dub3 in a high-stakes balancing act.	Pubmed	1.478e-27	1.636e-23	1.091e-24	1.079e-23	20	33	USP17L26,USP17L24,USP17L25,USP17L27,USP17L5,USP17L28,USP17L29,USP17L30,USP17L6P,USP17L22,USP17L15,USP17L21,USP17L20,USP17L19,USP17L18,USP17L17,USP17L13,USP17L12,USP17L11,USP17L10
	19188362	USP17 regulates Ras activation and cell proliferation by blocking RCE1 activity.	Pubmed	3.55e-27	3.929e-23	2.456e-24	2.429e-23	20	34	USP17L26,USP17L24,USP17L25,USP17L27,USP17L5,USP17L28,USP17L29,USP17L30,USP17L6P,USP17L22,USP17L15,USP17L21,USP17L20,USP17L19,USP17L18,USP17L17,USP17L13,USP17L12,USP17L11,USP17L10
	20228808	Ubiquitin hydrolase Dub3 promotes oncogenic transformation by stabilizing Cdc25A.	Pubmed	3.924e-26	4.343e-22	2.554e-23	2.526e-22	20	37	USP17L26,USP17L24,USP17L25,USP17L27,USP17L5,USP17L28,USP17L29,USP17L30,USP17L6P,USP17L22,USP17L15,USP17L21,USP17L20,USP17L19,USP17L18,USP17L17,USP17L13,USP17L12,USP17L11,USP17L10
	8622927	DUB-1, a deubiquitinating enzyme with growth-suppressing activity.	Pubmed	6.963e-22	7.706e-18	3.35e-19	3.313e-18	15	21	USP17L5,USP17L28,USP17L6P,USP17L9P,USP17L22,USP17L15,USP17L21,USP17L20,USP17L19,USP17L18,USP17L17,USP17L13,USP17L12,USP17L11,USP17L10
	14583620	DUB-1A, a novel deubiquitinating enzyme subfamily member, is polyubiquitinated and cytokine-inducible in B-lymphocytes.	Pubmed	6.963e-22	7.706e-18	3.35e-19	3.313e-18	15	21	USP17L5,USP17L28,USP17L6P,USP17L9P,USP17L22,USP17L15,USP17L21,USP17L20,USP17L19,USP17L18,USP17L17,USP17L13,USP17L12,USP17L11,USP17L10
	11468161	DUB-2A, a new member of the DUB subfamily of hematopoietic deubiquitinating enzymes.	Pubmed	6.963e-22	7.706e-18	3.35e-19	3.313e-18	15	21	USP17L5,USP17L28,USP17L6P,USP17L9P,USP17L22,USP17L15,USP17L21,USP17L20,USP17L19,USP17L18,USP17L17,USP17L13,USP17L12,USP17L11,USP17L10
	8756639	The murine DUB-1 gene is specifically induced by the betac subunit of interleukin-3 receptor.	Pubmed	6.963e-22	7.706e-18	3.35e-19	3.313e-18	15	21	USP17L5,USP17L28,USP17L6P,USP17L9P,USP17L22,USP17L15,USP17L21,USP17L20,USP17L19,USP17L18,USP17L17,USP17L13,USP17L12,USP17L11,USP17L10
	12447969	Lymphocyte-specific murine deubiquitinating enzymes induced by cytokines.	Pubmed	6.963e-22	7.706e-18	3.35e-19	3.313e-18	15	21	USP17L5,USP17L28,USP17L6P,USP17L9P,USP17L22,USP17L15,USP17L21,USP17L20,USP17L19,USP17L18,USP17L17,USP17L13,USP17L12,USP17L11,USP17L10
	18980247	DUB-1, a fate determinant of dynein heavy chain in B-lymphocytes, is regulated by the ubiquitin-proteasome pathway.	Pubmed	6.963e-22	7.706e-18	3.35e-19	3.313e-18	15	21	USP17L5,USP17L28,USP17L6P,USP17L9P,USP17L22,USP17L15,USP17L21,USP17L20,USP17L19,USP17L18,USP17L17,USP17L13,USP17L12,USP17L11,USP17L10
	9154835	JAK2 is required for induction of the murine DUB-1 gene.	Pubmed	2.164e-21	2.395e-17	9.98e-19	9.869e-18	15	22	USP17L5,USP17L28,USP17L6P,USP17L9P,USP17L22,USP17L15,USP17L21,USP17L20,USP17L19,USP17L18,USP17L17,USP17L13,USP17L12,USP17L11,USP17L10
	14983052	The human olfactory receptor gene family.	Pubmed	7.854e-21	8.692e-17	3.477e-18	3.438e-17	39	393	OR2M7,OR2T33,OR4N4,OR4F3,OR2M5,OR2T12,OR1A1,OR1D5,OR1G1,OR4K15,OR4N2,OR4K2,OR4N5,OR4K17,OR11G2,OR4K13,OR4Q2,OR11H7,OR11H4,OR4M1,OR4Q3,OR4N3P,OR4M2,OR4K5,OR11H2,OR4F15,OR4F6,OR10A7,OR2L5,OR1A2,OR2L2,OR4K1,OR6C74,OR1D4,OR4K14,OR4L1,OR11H6,OR1D2,OR4K3
	8995226	DUB-2 is a member of a novel family of cytokine-inducible deubiquitinating enzymes.	Pubmed	1.623e-20	1.796e-16	6.908e-18	6.832e-17	15	24	USP17L5,USP17L28,USP17L6P,USP17L9P,USP17L22,USP17L15,USP17L21,USP17L20,USP17L19,USP17L18,USP17L17,USP17L13,USP17L12,USP17L11,USP17L10
	21115691	Interleukin 1 receptor signaling regulates DUBA expression and facilitates Toll-like receptor 9-driven antiinflammatory cytokine production.	Pubmed	4.013e-20	4.441e-16	1.645e-17	1.627e-16	15	25	USP17L5,USP17L28,USP17L6P,USP17L9P,USP17L22,USP17L15,USP17L21,USP17L20,USP17L19,USP17L18,USP17L17,USP17L13,USP17L12,USP17L11,USP17L10
	16863688	TBC1D3, a hominoid oncoprotein, is encoded by a cluster of paralogues located on chromosome 17q12.	Pubmed	7.201e-19	7.969e-15	2.846e-16	2.815e-15	11	11	TBC1D3G,TBC1D3K,TBC1D3F,TBC1D3L,TBC1D3D,TBC1D3C,TBC1D3B,TBC1D3I,TBC1D3E,TBC1D3,TBC1D3H
	32527007	Minor Splicing Factors	Pubmed	9.11e-19	1.008e-14	3.477e-16	3.438e-15	15	29	USP17L5,USP17L28,USP17L6P,USP17L9P,USP17L22,USP17L15,USP17L21,USP17L20,USP17L19,USP17L18,USP17L17,USP17L13,USP17L12,USP17L11,USP17L10
	11875048	Different evolutionary processes shaped the mouse and human olfactory receptor gene families.	Pubmed	3.995e-15	4.422e-11	1.426e-12	1.41e-11	31	340	OR2M7,OR2L3,OR2T33,OR2M2,OR2M5,OR2T12,OR1A1,OR1D5,OR4K15,OR4N2,OR4K2,OR4N5,OR11G2,OR11H7,OR11H4,OR4M1,OR4Q3,OR4M2,OR4K5,OR4F15,OR4F6,OR4F13P,OR2L5,OR1A2,OR2L2,OR4K1,OR6C74,OR2L13,OR4L1,OR11H6,OR1D2
	11802173	The olfactory receptor gene superfamily of the mouse.	Pubmed	3.995e-15	4.422e-11	1.426e-12	1.41e-11	31	340	OR2M7,OR2L3,OR2T33,OR2M2,OR2M5,OR2T12,OR1A1,OR1D5,OR4K15,OR4N2,OR4K2,OR4N5,OR11G2,OR11H7,OR11H4,OR4M1,OR4Q3,OR4M2,OR4K5,OR4F15,OR4F6,OR4F13P,OR2L5,OR1A2,OR2L2,OR4K1,OR6C74,OR2L13,OR4L1,OR11H6,OR1D2
	14611657	Odorant receptor expressed sequence tags demonstrate olfactory expression of over 400 genes, extensive alternate splicing and unequal expression levels.	Pubmed	6.593e-15	7.296e-11	2.28e-12	2.255e-11	31	346	OR2M7,OR2L3,OR2T33,OR2M2,OR2M5,OR2T12,OR1A1,OR1D5,OR4K15,OR4N2,OR4K2,OR4N5,OR11G2,OR11H7,OR11H4,OR4M1,OR4Q3,OR4M2,OR4K5,OR4F15,OR4F6,OR4F13P,OR2L5,OR1A2,OR2L2,OR4K1,OR6C74,OR2L13,OR4L1,OR11H6,OR1D2
	19291764	RNF135 mutations are not present in patients with Sotos syndrome-like features.	Pubmed	1.664e-14	1.841e-10	5.58e-12	5.518e-11	10	13	ATAD5,SUZ12P1,CRLF3,SH3GL1P2,RNF135,ADAP2,LOC107984974,DPRXP4,TEFM,LOC646030
	31806660	DUX is a non-essential synchronizer of zygotic genome activation.	Pubmed	2.096e-14	2.32e-10	6.824e-12	6.748e-11	15	50	USP17L5,USP17L28,USP17L6P,USP17L9P,USP17L22,USP17L15,USP17L21,USP17L20,USP17L19,USP17L18,USP17L17,USP17L13,USP17L12,USP17L11,USP17L10
	16625196	DNA sequence of human chromosome 17 and analysis of rearrangement in the human lineage.	Pubmed	1.303e-11	1.442e-07	4.121e-09	4.076e-08	15	74	LRRC37A2,MEIS3P1,ZNF286B,TBC1D3G,TBC1D3F,TBC1D3D,BTBD17,CCL4L2,TBC1D3B,CDRT15P2,KIF19,TBC1D3E,TBC1D3,TBC1D3H,FAM106C
	29668722	A family of long intergenic non-coding RNA genes in human chromosomal region 22q11.2 carry a DNA translocation breakpoint/AT-rich sequence.	Pubmed	6.813e-11	7.54e-07	2.094e-08	2.071e-07	8	11	FAM230J,FAM230B,FAM230E,FAM230H,FAM230I,FAM230D,FAM230F,FAM230A
	16572171	Analysis of the DNA sequence and duplication history of human chromosome 15.	Pubmed	9.072e-11	1.004e-06	2.714e-08	2.683e-07	13	55	GOLGA8IP,GOLGA6L3,POTEB3,NBEAP1,GOLGA6L4,GOLGA8CP,POTEB,GOLGA8S,GOLGA6L6,GOLGA8K,GOLGA6L10,GOLGA6L22,GOLGA8O
	15358107	Human SULT1A3 pharmacogenetics: gene duplication and functional genomic studies.	Pubmed	3.037e-09	3.361e-05	8.846e-07	8.748e-06	6	6	SLX1B,SULT1A3,SLX1A,SLX1B-SULT1A4,SLX1A-SULT1A3,SULT1A4
	11997339	Structure and evolution of the Smith-Magenis syndrome repeat gene clusters, SMS-REPs.	Pubmed	4.338e-09	4.801e-05	1.231e-06	1.217e-05	10	33	LGALS9C,FAM106A,KRT17P2,KRT17P5,CCDC144B,USP32P2,CCDC144A,KRT17P1,USP32P1,FAM106C
	12009310	Up-regulated expression of a novel gene in activated human peripheral blood mononuclear cells that is a truncated paralog of the human system L-amino acid transporter 1.	Pubmed	5.167e-06	0.05719	0.00143	0.01414	5	7	SMG1P2,SLC7A5P2,SMG1P6,SMG1P3,BOLA2
	24318996	Formation of hepatic DNA adducts by methyleugenol in mouse models: drastic decrease by Sult1a1 knockout and strong increase by transgenic human SULT1A1/2.	Pubmed	2.122e-05	0.2348	0.004997	0.04941	4	4	SULT1A2,SULT1A1,SULT1A3,SULT1A4
	8424956	Molecular cloning of cDNA encoding the phenol/aryl form of sulfotransferase (mSTp1) from mouse liver.	Pubmed	2.122e-05	0.2348	0.004997	0.04941	4	4	SULT1A2,SULT1A1,SULT1A3,SULT1A4
	33414449	Decreased phenol sulfotransferase activities associated with hyperserotonemia in autism spectrum disorders.	Pubmed	2.122e-05	0.2348	0.004997	0.04941	4	4	SULT1A2,SULT1A1,SULT1A3,SULT1A4
	8943792	Steroid sulfotransferases.	Pubmed	2.122e-05	0.2348	0.004997	0.04941	4	4	SULT1A2,SULT1A1,SULT1A3,SULT1A4
	8288252	Mapping of the phenol sulfotransferase gene (STP) to human chromosome 16p12.1-p11.2 and to mouse chromosome 7.	Pubmed	2.122e-05	0.2348	0.004997	0.04941	4	4	SULT1A2,SULT1A1,SULT1A3,SULT1A4
	12390022	A single mutation converts the nucleotide specificity of phenol sulfotransferase from PAP to AMP.	Pubmed	2.122e-05	0.2348	0.004997	0.04941	4	4	SULT1A2,SULT1A1,SULT1A3,SULT1A4
	25370010	Bioactivation of food genotoxicants 5-hydroxymethylfurfural and furfuryl alcohol by sulfotransferases from human, mouse and rat: a comparative study.	Pubmed	2.122e-05	0.2348	0.004997	0.04941	4	4	SULT1A2,SULT1A1,SULT1A3,SULT1A4
	10673334	Sequence, structure, and evolution of a complete human olfactory receptor gene cluster.	Pubmed	2.168e-05	0.24	0.005	0.04944	6	16	OR1A1,OR1D5,OR1G1,OR1A2,OR1D4,OR1D2
	7601475	Rat phenol-preferring sulfotransferase genes (Stp and Stp2): localization to mouse chromosomes 7 and 17.	Pubmed	6.018e-05	0.666	0.01359	0.1344	5	10	SULT1A2,SULT1A1,SULT1A3,SULT1C3,SULT1A4
	32126975	Expert curation of the human and mouse olfactory receptor gene repertoires identifies conserved coding regions split across two exons.	Pubmed	7.436e-05	0.8229	0.01646	0.1628	8	46	OR2T12,OR4M2B,OR1A1,OR4N4C,OR4K2,OR11H4,OR2L5,OR1D2
	12213199	DEFOG: a practical scheme for deciphering families of genes.	Pubmed	8.661e-05	0.9585	0.01879	0.1859	15	219	OR2M2,OR1A1,OR1D5,OR11G2,OR4Q2,OR11H7,OR4F15,OR10A7,OR1A2,OR2M1P,OR4K1,OR1D4,OR4K14,OR1D2,OR4K3
	11389699	Identification of a new subfamily of sulphotransferases: cloning and characterization of canine SULT1D1.	Pubmed	0.0001038	1.149	0.02089	0.2066	4	5	SULT1A2,SULT1A1,SULT1A3,SULT1A4
	29908303	Hemoglobin adducts of furfuryl alcohol in genetically modified mouse models: Role of endogenous sulfotransferases 1a1 and 1d1 and transgenic human sulfotransferases 1A1/1A2.	Pubmed	0.0001038	1.149	0.02089	0.2066	4	5	SULT1A2,SULT1A1,SULT1A3,SULT1A4
	24802129	Determination of sulfotransferase forms involved in the metabolic activation of the genotoxicant 1-hydroxymethylpyrene using bacterially expressed enzymes and genetically modified mouse models.	Pubmed	0.0001038	1.149	0.02089	0.2066	4	5	SULT1A2,SULT1A1,SULT1A3,SULT1A4
	25053625	The effect of knockout of sulfotransferases 1a1 and 1d1 and of transgenic human sulfotransferases 1A1/1A2 on the formation of DNA adducts from furfuryl alcohol in mouse models.	Pubmed	0.0001038	1.149	0.02089	0.2066	4	5	SULT1A2,SULT1A1,SULT1A3,SULT1A4
	17425406	Structural and chemical profiling of the human cytosolic sulfotransferases.	Pubmed	0.0002982	3.301	0.05894	0.5829	5	13	SULT1A2,SULT1A1,SULT1A3,SULT1C3,SULT1A4
	12438748	Chromosomal localization of three vacuolar-H+ -ATPase 16 kDa subunit (ATP6V0C) genes in the murine genome.	Pubmed	0.0007128	7.889	0.136	1.345	4	7	SULT1A2,SULT1A1,SULT1A3,SULT1A4
	9370299	The mouse Plk gene: structural characterization, chromosomal localization and identification of a processed Plk pseudogene.	Pubmed	0.0007128	7.889	0.136	1.345	4	7	SULT1A2,SULT1A1,SULT1A3,SULT1A4
	12475935	POTE, a highly homologous gene family located on numerous chromosomes and expressed in prostate, ovary, testis, placenta, and prostate cancer.	Pubmed	0.001412	15.63	0.2562	2.533	4	8	POTEJ,POTEB3,POTEB2,POTEB
	10594240	Alternative splicing, gene localization, and binding of SH2-B to the insulin receptor kinase domain.	Pubmed	0.001412	15.63	0.2562	2.533	4	8	SULT1A2,SULT1A1,SULT1A3,SULT1A4
	11170746	Mouse-human orthology relationships in an olfactory receptor gene cluster.	Pubmed	0.001412	15.63	0.2562	2.533	4	8	OR1A1,OR1D5,OR1A2,OR1D2
	7695643	Human platelet phenolsulfotransferases: cDNA cloning, stable expression in V79 cells and identification of a novel allelic variant of the phenol-sulfating form.	Pubmed	0.001769	19.57	0.2966	2.933	3	3	SULT1A1,SULT1A3,SLX1A-SULT1A3
	8363592	Identification of two human brain aryl sulfotransferase cDNAs.	Pubmed	0.001769	19.57	0.2966	2.933	3	3	SULT1A1,SULT1A3,SULT1A4
	9855620	A single amino acid, glu146, governs the substrate specificity of a human dopamine sulfotransferase, SULT1A3.	Pubmed	0.001769	19.57	0.2966	2.933	3	3	SULT1A1,SULT1A3,SULT1A4
	8912648	Genomic organization and DNA sequences of two human phenol sulfotransferase genes (STP1 and STP2) on the short arm of chromosome 16.	Pubmed	0.001769	19.57	0.2966	2.933	3	3	SULT1A2,SULT1A1,SULT1A3
	33177158	NSUN5 Facilitates Viral RNA Recognition by RIG-I Receptor.	Pubmed	0.001769	19.57	0.2966	2.933	3	3	DDX58,NSUN5P2,NSUN5
	15252450	Lineage-specific gene duplication and loss in human and great ape evolution.	Pubmed	0.001869	20.68	0.3074	3.04	8	69	RAB6C-AS1,POM121L8P,CHRNA7,ANAPC1,TCAF1,CFC1,LINC02203,GTF2IP1
	20056724	Phase II metabolism of hesperetin by individual UDP-glucuronosyltransferases and sulfotransferases and rat and human tissue samples.	Pubmed	0.001889	20.9	0.3074	3.04	5	18	UGT2B7,SULT1A2,SULT1A1,SULT1A3,SULT1A4
	9166597	The gene encoding the heart/muscle isoform of cytochrome c oxidase subunit VIII maps to mouse chromosome 7.	Pubmed	0.002517	27.86	0.3714	3.673	4	9	SULT1A2,SULT1A1,SULT1A3,SULT1A4
	8887328	Msx3: a novel murine homologue of the Drosophila msh homeobox gene restricted to the dorsal embryonic central nervous system.	Pubmed	0.002517	27.86	0.3714	3.673	4	9	SULT1A2,SULT1A1,SULT1A3,SULT1A4
	23207770	Ethanol sulfation by the human cytosolic sulfotransferases: a systematic analysis.	Pubmed	0.002517	27.86	0.3714	3.673	4	9	SULT1A2,SULT1A1,SULT1A3,SULT1A4
	8468045	Molecular characterization and mapping of murine genes encoding three members of the stefin family of cysteine proteinase inhibitors.	Pubmed	0.002517	27.86	0.3714	3.673	4	9	SULT1A2,SULT1A1,SULT1A3,SULT1A4
	19548878	Inhibitory effects of kynurenic acid, a tryptophan metabolite, and its derivatives on cytosolic sulfotransferases.	Pubmed	0.002517	27.86	0.3714	3.673	4	9	SULT1A2,SULT1A1,SULT1A3,SULT1A4
	9060415	Chromosomal localization of the mouse genes encoding the ERK1 and ERK2 isoforms of MAP kinases.	Pubmed	0.002517	27.86	0.3714	3.673	4	9	SULT1A2,SULT1A1,SULT1A3,SULT1A4
	9177785	Structure of the human gene (COX6A2) for the heart/muscle isoform of cytochrome c oxidase subunit VIa and its chromosomal location in humans, mice, and cattle.	Pubmed	0.002517	27.86	0.3714	3.673	4	9	SULT1A2,SULT1A1,SULT1A3,SULT1A4
	15461802	A genome annotation-driven approach to cloning the human ORFeome.	Pubmed	0.00358	39.62	0.5214	5.156	15	294	USP18,DGCR6,SYN3,DRICH1,UBE2L3,PI4KAP2,SLC7A4,RFPL2,RFPL1S,HIC2,GGT1,GGT5,C22orf42,RFPL1,P2RX6
	21062905	In silico QTL mapping of basal liver iron levels in inbred mouse strains.	Pubmed	0.004354	48.18	0.6258	6.188	5	21	PMS2,AIMP2,LONP2,OCM,ABCC12
	11779826	Generation and comparative analysis of approximately 3.3 Mb of mouse genomic sequence orthologous to the region of human chromosome 7q11.23 implicated in Williams syndrome.	Pubmed	0.005968	66.05	0.8468	8.374	6	38	NSUN5P2,NSUN5,NCF1C,NCF1B,POM121,BAZ1B
	7613026	Localization of the murine cholecystokinin A and B receptor genes.	Pubmed	0.006467	71.57	0.8516	8.422	4	11	SULT1A2,SULT1A1,SULT1A3,SULT1A4
	11154739	Sulfotransferases in the bioactivation of xenobiotics.	Pubmed	0.006467	71.57	0.8516	8.422	4	11	SULT1A2,SULT1A1,SULT1A3,SULT1A4
	8954725	Tbx6, a mouse T-Box gene implicated in paraxial mesoderm formation at gastrulation.	Pubmed	0.006467	71.57	0.8516	8.422	4	11	SULT1A2,SULT1A1,SULT1A3,SULT1A4
	9034160	Sulfation and sulfotransferases 1: Sulfotransferase molecular biology: cDNAs and genes.	Pubmed	0.006467	71.57	0.8516	8.422	4	11	SULT1A2,SULT1A1,SULT1A3,SULT1A4
	10720750	Sulfotransferases: genetics and role in toxicology.	Pubmed	0.006467	71.57	0.8516	8.422	4	11	SULT1A2,SULT1A1,SULT1A3,SULT1A4
	8661000	Human phenol sulfotransferase STP2 gene: molecular cloning, structural characterization, and chromosomal localization.	Pubmed	0.006926	76.65	0.8516	8.422	3	4	SULT1A2,SULT1A1,SULT1C3
	22984479	Embryonic demise caused by targeted disruption of a cysteine protease Dub-2.	Pubmed	0.006926	76.65	0.8516	8.422	3	4	USP17L9P,USP17L15,USP17L13
	12359748	PRC17, a novel oncogene encoding a Rab GTPase-activating protein, is amplified in prostate cancer.	Pubmed	0.006926	76.65	0.8516	8.422	3	4	TBC1D3F,TBC1D3D,TBC1D3
	15377787	High-throughput microarray detection of olfactory receptor gene expression in the mouse.	Pubmed	0.006926	76.65	0.8516	8.422	3	4	OR2M7,OR2M2,OR2M5
	8406013	Identification of novel sequences in the repertoire of hypervariable TRE17 genes from immortalized nonmalignant and malignant human keratinocytes.	Pubmed	0.006926	76.65	0.8516	8.422	3	4	TBC1D3F,TBC1D3D,TBC1D3
	19091768	RIM-BP3 is a manchette-associated protein essential for spermiogenesis.	Pubmed	0.006926	76.65	0.8516	8.422	3	4	RIMBP3,RIMBP3B,RIMBP3C
	32152050	Interaction of the Brain-Selective Sulfotransferase SULT4A1 with Other Cytosolic Sulfotransferases: Effects on Protein Expression and Function.	Pubmed	0.006926	76.65	0.8516	8.422	3	4	SULT1A1,SULT1A3,SULT1A4
	17632510	Mutations in RNF135, a gene within the NF1 microdeletion region, cause phenotypic abnormalities including overgrowth.	Pubmed	0.009608	106.3	1.131	11.19	4	12	ATAD5,CRLF3,RNF135,TEFM
	19915574	Common variants at five new loci associated with early-onset inflammatory bowel disease.	Pubmed	0.009608	106.3	1.131	11.19	4	12	SGF29,EIF3C,SULT1A2,SULT1A1
	7706460	Identification of four chromosomal loci determining obesity in a multifactorial mouse model.	Pubmed	0.009608	106.3	1.131	11.19	4	12	SULT1A2,SULT1A1,SULT1A3,SULT1A4
	11468690	Molecular characterization and gene content of breakpoint boundaries in patients with neurofibromatosis type 1 with 17q11.2 microdeletions.	Pubmed	0.009608	106.3	1.131	11.19	4	12	ATAD5,CRLF3,RNF135,TEFM
	20459673	Analysis of microRNA transcriptome by deep sequencing of small RNA libraries of peripheral blood.	Pubmed	0.01339	148.2	1.56	15.43	5	26	MIR3680-1,MIR3675,MIR3670-4,MIR3670-3,MIR3680-2
	10585447	PHR1 encodes an abundant, pleckstrin homology domain-containing integral membrane protein in the photoreceptor outer segments.	Pubmed	0.01375	152.1	1.568	15.51	4	13	SULT1A2,SULT1A1,SULT1A3,SULT1A4
	12696059	Complete physical map and gene content of the human NF1 tumor suppressor region in human and mouse.	Pubmed	0.01375	152.1	1.568	15.51	4	13	CRLF3,RNF135,ADAP2,TEFM
	28625976	A Genome-Wide CRISPR Screen Identifies Genes Critical for Resistance to FLT3 Inhibitor AC220.	Pubmed	0.01514	167.6	1.71	16.91	9	119	USP17L21,USP17L20,AMZ1,USP17L19,USP17L18,SULT1A3,USP17L17,USP17L12,USP17L11
	12604796	The Tre2 (USP6) oncogene is a hominoid-specific gene.	Pubmed	0.01716	189.9	1.826	18.06	3	5	TBC1D3D,TBC1D3C,TBC1D3
	10508838	Duplications on human chromosome 22 reveal a novel Ret Finger Protein-like gene family with sense and endogenous antisense transcripts.	Pubmed	0.01716	189.9	1.826	18.06	3	5	RFPL2,RFPL1S,RFPL1
	8471161	Human TRE17 oncogene is generated from a family of homologous polymorphic sequences by single-base changes.	Pubmed	0.01716	189.9	1.826	18.06	3	5	TBC1D3F,TBC1D3D,TBC1D3
	28383562	VPS35 regulates parkin substrate AIMP2 toxicity by facilitating lysosomal clearance of AIMP2.	Pubmed	0.01716	189.9	1.826	18.06	3	5	VPS35,AIMP2,PRKN
	19718026	Personalized copy number and segmental duplication maps using next-generation sequencing.	Pubmed	0.01716	189.9	1.826	18.06	3	5	POTEB3,POTEB,TBC1D3
	17855024	Structure and evolution of RIM-BP genes: identification of a novel family member.	Pubmed	0.01716	189.9	1.826	18.06	3	5	RIMBP3,RIMBP3B,RIMBP3C
	18357469	The human gamma-glutamyltransferase gene family.	Pubmed	0.01906	210.9	2.009	19.87	4	14	GGTLC3,GGT1,GGT3P,GGT5
	1741163	cDNA sequence of a growth factor-inducible immediate early gene and characterization of its encoded protein.	Pubmed	0.02574	284.9	2.688	26.58	4	15	SULT1A2,SULT1A1,SULT1A3,SULT1A4
	11463821	Disruption of gamma-glutamyl leukotrienase results in disruption of leukotriene D(4) synthesis in vivo and attenuation of the acute inflammatory response.	Pubmed	0.03401	376.4	3.485	34.46	3	6	GGT1,GGT3P,GGT5
	12163373	Gamma-glutamyl leukotrienase, a novel endothelial membrane protein, is specifically responsible for leukotriene D(4) formation in vivo.	Pubmed	0.03401	376.4	3.485	34.46	3	6	GGT1,GGT3P,GGT5
	23816522	Expression of NOL1/NOP2/sun domain (Nsun) RNA methyltransferase family genes in early mouse embryogenesis.	Pubmed	0.05898	652.7	5.934	58.68	3	7	NSUN5P2,NSUN5,NSUN6
	9949213	The ancestral gene for transcribed, low-copy repeats in the Prader-Willi/Angelman region encodes a large protein implicated in protein trafficking, which is deficient in mice with neuromuscular and spermiogenic abnormalities.	Pubmed	0.05898	652.7	5.934	58.68	3	7	HERC2P3,HERC2P7,HERC2P2
	30228200	Transcriptional fates of human-specific segmental duplications in brain.	Pubmed	0.07035	778.6	7.014	69.37	4	19	GTF2IRD2B,FRMPD2B,GTF2IP4,GTF2IP1
	17698589	Memory CD8+ T cells mediate antibacterial immunity via CCL3 activation of TNF/ROI+ phagocytes.	Pubmed	0.09352	1000	7.367	72.86	3	8	CCL3L3,NCF1C,NCF1B
	12730696	Different noses for different people.	Pubmed	0.09352	1000	7.367	72.86	3	8	OR4Q2,OR11H7,OR4K3
	15229288	Over-expression of Rififylin, a new RING finger and FYVE-like domain-containing protein, inhibits recycling from the endocytic recycling compartment.	Pubmed	0.1066	1000	7.367	72.86	4	21	GOLGA8N,RAB6A,GOLGA8K,GOLGA8O
	32301970	Inactivation of Wt1 causes pre-granulosa cell to steroidogenic cell transformation and defect of ovary development?.	Pubmed	0.1066	1000	7.367	72.86	4	21	SULT1A2,SULT1A1,SULT1A3,SULT1A4
	15616553	The sequence and analysis of duplication-rich human chromosome 16.	Pubmed	0.1128	1000	7.367	72.86	7	90	RRN3P2,NOMO2,NPIPB9,NPIPB3,NPIPB8,SNX29P1,NPIPB11
	23374343	Induction of Siglec-G by RNA viruses inhibits the innate immune response by promoting RIG-I degradation.	Pubmed	0.139	1000	7.367	72.86	3	9	DDX58,SIGLEC16,SIGLEC11
	16364570	Duplication and extensive remodeling shaped POTE family genes encoding proteins containing ankyrin repeat and coiled coil domains.	Pubmed	0.139	1000	7.367	72.86	3	9	POTEJ,ANKRD62,POTEI
	10652340	Purification and characterization of a neutral ceramidase from mouse liver. A single protein catalyzes the reversible reaction in which ceramide is both hydrolyzed and synthesized.	Pubmed	0.1471	1000	7.367	72.86	2	2	ASAH2,ASAH2B
	30485550	Cognitive deficits in mice lacking Nsun5, a cytosine-5 RNA methyltransferase, with impairment of oligodendrocyte precursor cells.	Pubmed	0.1471	1000	7.367	72.86	2	2	NSUN5P2,NSUN5
	14557071	Neutral ceramidase gene: role in regulating ceramide-induced apoptosis.	Pubmed	0.1471	1000	7.367	72.86	2	2	ASAH2,ASAH2B
	14871892	Active site mutations and substrate inhibition in human sulfotransferase 1A1 and 1A3.	Pubmed	0.1471	1000	7.367	72.86	2	2	SULT1A1,SULT1A3
	11959927	The past as the key to the present: resurrection of ancient proteins from eosinophils.	Pubmed	0.1471	1000	7.367	72.86	2	2	RNASE2,RNASE3
	12435403	Genomic structure and promoter analysis of the mouse neutral ceramidase gene.	Pubmed	0.1471	1000	7.367	72.86	2	2	ASAH2,ASAH2B
	1364010	TaqI polymorphisms at the annexin VIII locus (ANX8).	Pubmed	0.1471	1000	7.367	72.86	2	2	ANXA8L1,ANXA8
	24769558	Annexin A8 controls leukocyte recruitment to activated endothelial cells via cell surface delivery of CD63.	Pubmed	0.1471	1000	7.367	72.86	2	2	ANXA8L1,ANXA8
	27765572	Mouse eosinophil associated ribonucleases: Mechanism of cytotoxic, antibacterial and antiparasitic activities.	Pubmed	0.1471	1000	7.367	72.86	2	2	RNASE2,RNASE3
	2901712	Duplication of the bcr and gamma-glutamyl transpeptidase genes.	Pubmed	0.1471	1000	7.367	72.86	2	2	BCR,GGT1
	11328816	Purification, characterization, molecular cloning, and subcellular distribution of neutral ceramidase of rat kidney.	Pubmed	0.1471	1000	7.367	72.86	2	2	ASAH2,ASAH2B
	16126722	Involvement of neutral ceramidase in ceramide metabolism at the plasma membrane and in extracellular milieu.	Pubmed	0.1471	1000	7.367	72.86	2	2	ASAH2,ASAH2B
	15526002	Characterization of the divergent eosinophil ribonuclease, mEar 6, and its expression in response to Schistosoma mansoni infection in vivo.	Pubmed	0.1471	1000	7.367	72.86	2	2	RNASE2,RNASE3
	2745977	Eosinophil cationic protein cDNA. Comparison with other toxic cationic proteins and ribonucleases.	Pubmed	0.1471	1000	7.367	72.86	2	2	RNASE2,RNASE3
	21447318	Gamma-glutamyl compounds: substrate specificity of gamma-glutamyl transpeptidase enzymes.	Pubmed	0.1471	1000	7.367	72.86	2	2	GGT1,GGT5
	23358261	Single nucleotide polymorphisms in SULT1A1 and SULT1A2 in a Korean population.	Pubmed	0.1471	1000	7.367	72.86	2	2	SULT1A2,SULT1A1
	29306076	Cooperative binding promotes demand-driven recruitment of AnxA8 to cholesterol-containing membranes.	Pubmed	0.1471	1000	7.367	72.86	2	2	ANXA8L1,ANXA8
	22677423	Neonatal oxygen increases sensitivity to influenza A virus infection in adult mice by suppressing epithelial expression of Ear1.	Pubmed	0.1471	1000	7.367	72.86	2	2	RNASE2,RNASE3
	19345744	Downregulation of neutral ceramidase by gemcitabine: Implications for cell cycle regulation.	Pubmed	0.1471	1000	7.367	72.86	2	2	ASAH2,ASAH2B
	26900161	Lactosylceramide contributes to mitochondrial dysfunction in diabetes.	Pubmed	0.1471	1000	7.367	72.86	2	2	ASAH2,ASAH2B
	25713137	Eosinophil-associated ribonuclease 11 is a macrophage chemoattractant.	Pubmed	0.1471	1000	7.367	72.86	2	2	RNASE2,RNASE3
	1464733	Eosinophil granule proteins in peripheral blood granulocytes.	Pubmed	0.1471	1000	7.367	72.86	2	2	RNASE2,RNASE3
	1608955	A putative gene family in 15q11-13 and 16p11.2: possible implications for Prader-Willi and Angelman syndromes.	Pubmed	0.1471	1000	7.367	72.86	2	2	HERC2P3,HERC2P2
	34433829	Evidence for opposing selective forces operating on human-specific duplicated TCAF genes in Neanderthals and humans.	Pubmed	0.1471	1000	7.367	72.86	2	2	TCAF2,TCAF1
	23992292	Towards the rational design of antimicrobial proteins: single point mutations can switch on bactericidal and agglutinating activities on the RNase A superfamily lineage.	Pubmed	0.1471	1000	7.367	72.86	2	2	RNASE2,RNASE3
	22940715	Loss of neutral ceramidase increases inflammation in a mouse model of inflammatory bowel disease.	Pubmed	0.1471	1000	7.367	72.86	2	2	ASAH2,ASAH2B
	24659784	Essential roles of neutral ceramidase and sphingosine in mitochondrial dysfunction due to traumatic brain injury.	Pubmed	0.1471	1000	7.367	72.86	2	2	ASAH2,ASAH2B
	17334805	A novel gene derived from a segmental duplication shows perturbed expression in Alzheimer's disease.	Pubmed	0.1471	1000	7.367	72.86	2	2	ASAH2,ASAH2B
	11207031	Sulfation pharmacogenetics: SULT1A1 and SULT1A2 allele frequencies in Caucasian, Chinese and African-American subjects.	Pubmed	0.1471	1000	7.367	72.86	2	2	SULT1A2,SULT1A1
	24533866	Glutathione-conjugated sulfanylalkanols are substrates for ABCC11 and ?-glutamyl transferase 1: a potential new pathway for the formation of odorant precursors in the apocrine sweat gland.	Pubmed	0.1471	1000	7.367	72.86	2	2	ABCC11,GGT1
	12761191	Differential roles of human monoamine (M)-form and simple phenol (P)-form phenol sulfotransferases in drug metabolism.	Pubmed	0.1471	1000	7.367	72.86	2	2	SULT1A1,SULT1A3
	3458170	Biochemical and functional similarities between human eosinophil-derived neurotoxin and eosinophil cationic protein: homology with ribonuclease.	Pubmed	0.1471	1000	7.367	72.86	2	2	RNASE2,RNASE3
	26747710	Loss of neutral ceramidase protects cells from nutrient- and energy -deprivation-induced cell death.	Pubmed	0.1471	1000	7.367	72.86	2	2	ASAH2,ASAH2B
	20936502	Genetic polymorphisms of sulfotransferases (SULT1A1 and SULT1A2) in a Turkish population.	Pubmed	0.1471	1000	7.367	72.86	2	2	SULT1A2,SULT1A1
	11331942	Mouse eosinophil-associated ribonucleases: a unique subfamily expressed during hematopoiesis.	Pubmed	0.1471	1000	7.367	72.86	2	2	RNASE2,RNASE3
	23341783	Positional cloning reveals strain-dependent expression of Trim16 to alter susceptibility to bleomycin-induced pulmonary fibrosis in mice.	Pubmed	0.1471	1000	7.367	72.86	2	2	TRIM16,TRIM16L
	21344395	Bone matrix regulates osteoclast differentiation and annexin A8 gene expression.	Pubmed	0.1471	1000	7.367	72.86	2	2	ANXA8L1,ANXA8
	10543947	Crystal structure of human catecholamine sulfotransferase.	Pubmed	0.1471	1000	7.367	72.86	2	2	SULT1A3,SULT1A4
	10973942	Parkin suppresses unfolded protein stress-induced cell death through its E3 ubiquitin-protein ligase activity.	Pubmed	0.1471	1000	7.367	72.86	2	2	UBE2L3,PRKN
	11919186	The estrogen-responsive B box protein: a novel regulator of keratinocyte differentiation.	Pubmed	0.1471	1000	7.367	72.86	2	2	TRIM16,TRIM16L
	11688999	Multiple splicing variants of two new human ATP-binding cassette transporters, ABCC11 and ABCC12.	Pubmed	0.1471	1000	7.367	72.86	2	2	ABCC11,ABCC12
	21613224	Novel pathway of ceramide production in mitochondria: thioesterase and neutral ceramidase produce ceramide from sphingosine and acyl-CoA.	Pubmed	0.1471	1000	7.367	72.86	2	2	ASAH2,ASAH2B
	11174844	The EGF-CFC family: novel epidermal growth factor-related proteins in development and cancer.	Pubmed	0.1471	1000	7.367	72.86	2	2	CFC1,CFC1B
	11311552	Gene structure and enzymatic activity of mouse eosinophil-associated ribonuclease 2.	Pubmed	0.1471	1000	7.367	72.86	2	2	RNASE2,RNASE3
	15256438	Mismatch repair gene PMS2: disease-causing germline mutations are frequent in patients whose tumors stain negative for PMS2 protein, but paralogous genes obscure mutation detection and interpretation.	Pubmed	0.1471	1000	7.367	72.86	2	2	PMS2,PMS2CL
	7581483	Primary structures and properties of two related forms of aryl sulfotransferases in human liver.	Pubmed	0.1471	1000	7.367	72.86	2	2	SULT1A2,SULT1A1
	16203777	Annexin A8 is up-regulated during mouse mammary gland involution and predicts poor survival in breast cancer.	Pubmed	0.1471	1000	7.367	72.86	2	2	ANXA8L1,ANXA8
	16014847	Genetic polymorphisms of eosinophil-derived neurotoxin and eosinophil cationic protein in tropical pulmonary eosinophilia.	Pubmed	0.1471	1000	7.367	72.86	2	2	RNASE2,RNASE3
	29705271	Effects of human SULT1A3/SULT1A4 genetic polymorphisms on the sulfation of acetaminophen and opioid drugs by the cytosolic sulfotransferase SULT1A3.	Pubmed	0.1471	1000	7.367	72.86	2	2	SULT1A3,SULT1A4
	15752422	Phylogenomic approaches to common problems encountered in the analysis of low copy repeats: the sulfotransferase 1A gene family example.	Pubmed	0.1471	1000	7.367	72.86	2	2	SULT1A3,SULT1A4
	11891283	Genetic variation at the 22q11 PRODH2/DGCR6 locus presents an unusual pattern and increases susceptibility to schizophrenia.	Pubmed	0.1471	1000	7.367	72.86	2	2	DGCR6,PRODH
	25889880	Novel protein kinase C ?: coronin 1A complex in T lymphocytes.	Pubmed	0.1471	1000	7.367	72.86	2	2	PRKCQ,CORO1A
	15928709	Annexins: linking Ca2+ signalling to membrane dynamics.	Pubmed	0.1471	1000	7.367	72.86	2	2	ANXA8L1,ANXA8
	20417180	Crystal structures of SULT1A2 and SULT1A1 *3: insights into the substrate inhibition and the role of Tyr149 in SULT1A2.	Pubmed	0.1471	1000	7.367	72.86	2	2	SULT1A2,SULT1A1
	23843640	Negative regulation of RIG-I-mediated innate antiviral signaling by SEC14L1.	Pubmed	0.1471	1000	7.367	72.86	2	2	DDX58,SEC14L1
	11054569	Rab6c, a new member of the rab gene family, is involved in drug resistance in MCF7/AdrR cells.	Pubmed	0.1471	1000	7.367	72.86	2	2	RAB6C,RAB6A
	27096575	Generation of phospho-ubiquitin variants by orthogonal translation reveals codon skipping.	Pubmed	0.1471	1000	7.367	72.86	2	2	UBE2L3,PRKN
	26086043	Functional pseudogenes inhibit the superoxide production.	Pubmed	0.1471	1000	7.367	72.86	2	2	NCF1C,NCF1B
	16151003	A human-specific gene in microglia.	Pubmed	0.1471	1000	7.367	72.86	2	2	SIGLEC16,SIGLEC11
	1315913	Novel G protein-coupled receptors: a gene family of putative human olfactory receptor sequences.	Pubmed	0.1471	1000	7.367	72.86	2	2	OR1D5,OR1D2
	34146477	Tripartite motif 16 ameliorates nonalcoholic steatohepatitis by promoting the degradation of phospho-TAK1.	Pubmed	0.1471	1000	7.367	72.86	2	2	TRIM16,TRIM16L
	18629938	SIGLEC16 encodes a DAP12-associated receptor expressed in macrophages that evolved from its inhibitory counterpart SIGLEC11 and has functional and non-functional alleles in humans.	Pubmed	0.1471	1000	7.367	72.86	2	2	SIGLEC16,SIGLEC11
	10753931	Molecular cloning of the full-length cDNA encoding mouse neutral ceramidase. A novel but highly conserved gene family of neutral/alkaline ceramidases.	Pubmed	0.1471	1000	7.367	72.86	2	2	ASAH2,ASAH2B
	32457448	Group-2 innate lymphoid cell-dependent regulation of tissue neutrophil migration by alternatively activated macrophage-secreted Ear11.	Pubmed	0.1471	1000	7.367	72.86	2	2	RNASE2,RNASE3
	10762004	Association between functional genetic polymorphisms of human sulfotransferases 1A1 and 1A2.	Pubmed	0.1471	1000	7.367	72.86	2	2	SULT1A2,SULT1A1
	9588171	Two novel testicular serine proteases, TESP1 and TESP2, are present in the mouse sperm acrosome.	Pubmed	0.1471	1000	7.367	72.86	2	2	PRSS40B,PRSS40A
	8117269	Human liver thermolabile phenol sulfotransferase: cDNA cloning, expression and characterization.	Pubmed	0.1471	1000	7.367	72.86	2	2	SULT1A3,SULT1A4
	12783850	The p38 subunit of the aminoacyl-tRNA synthetase complex is a Parkin substrate: linking protein biosynthesis and neurodegeneration.	Pubmed	0.1471	1000	7.367	72.86	2	2	AIMP2,PRKN
	31342168	Heterozygous loss of keratinocyte TRIM16 expression increases melanocytic cell lesions and lymph node metastasis.	Pubmed	0.1471	1000	7.367	72.86	2	2	TRIM16,TRIM16L
	27436590	Pulmonary epithelial cancer cells and their exosomes metabolize myeloid cell-derived leukotriene C4 to leukotriene D4.	Pubmed	0.1471	1000	7.367	72.86	2	2	GGT1,GGT5
	9566757	Localisation of aryl sulfotransferase expression in human tissues using hybridisation histochemistry and immunohistochemistry.	Pubmed	0.1471	1000	7.367	72.86	2	2	SULT1A2,SULT1A1
	11917092	Annexins: from structure to function.	Pubmed	0.1471	1000	7.367	72.86	2	2	ANXA8L1,ANXA8
	2387583	Structure and chromosome localization of the human eosinophil-derived neurotoxin and eosinophil cationic protein genes: evidence for intronless coding sequences in the ribonuclease gene superfamily.	Pubmed	0.1471	1000	7.367	72.86	2	2	RNASE2,RNASE3
	10594173	Rapid evolution of the ribonuclease A superfamily: adaptive expansion of independent gene clusters in rats and mice.	Pubmed	0.1471	1000	7.367	72.86	2	2	RNASE2,RNASE3
	11327798	Identification of differentially expressed genes in mouse development using differential display and in situ hybridization.	Pubmed	0.1471	1000	7.367	72.86	2	2	CFC1,CFC1B
	8666379	Analysis of the 5' region of PMS2 reveals heterogeneous transcripts and a novel overlapping gene.	Pubmed	0.1471	1000	7.367	72.86	2	2	PMS2,AIMP2
	16380386	Neutral ceramidase encoded by the Asah2 gene is essential for the intestinal degradation of sphingolipids.	Pubmed	0.1471	1000	7.367	72.86	2	2	ASAH2,ASAH2B
	28276439	Structure-guided mutagenesis reveals a hierarchical mechanism of Parkin activation.	Pubmed	0.1471	1000	7.367	72.86	2	2	UBE2L3,PRKN
	11024280	Subtractive hybridization identifies chick-cripto, a novel EGF-CFC ortholog expressed during gastrulation, neurulation and early cardiogenesis.	Pubmed	0.1471	1000	7.367	72.86	2	2	CFC1,CFC1B
	31722427	Loss of the ribosomal RNA methyltransferase NSUN5 impairs global protein synthesis and normal growth.	Pubmed	0.1471	1000	7.367	72.86	2	2	NSUN5P2,NSUN5
	8093002	Functional characterization of two human sulphotransferase cDNAs that encode monoamine- and phenol-sulphating forms of phenol sulphotransferase: substrate kinetics, thermal-stability and inhibitor-sensitivity studies.	Pubmed	0.1471	1000	7.367	72.86	2	2	SULT1A1,SULT1A3
	24328108	Isolated RING2 domain of parkin is sufficient for E2-dependent E3 ligase activity.	Pubmed	0.1471	1000	7.367	72.86	2	2	UBE2L3,PRKN
	26978485	The 22q11 PRODH/DGCR6 deletion is frequent in hyperprolinemic subjects but is not a strong risk factor for ASD.	Pubmed	0.1471	1000	7.367	72.86	2	2	DGCR6,PRODH
	31174389	Agenesis and Hypomyelination of Corpus Callosum in Mice Lacking Nsun5, an RNA Methyltransferase.	Pubmed	0.1471	1000	7.367	72.86	2	2	NSUN5P2,NSUN5
	25377544	Immunolabeling of gamma-glutamyl transferase 5 in normal human tissues reveals that expression and localization differ from gamma-glutamyl transferase 1.	Pubmed	0.1471	1000	7.367	72.86	2	2	GGT1,GGT5
	12927308	Diminished expression of an antiviral ribonuclease in response to pneumovirus infection in vivo.	Pubmed	0.1471	1000	7.367	72.86	2	2	RNASE2,RNASE3
	8901588	Two highly homologous ribonuclease genes expressed in mouse eosinophils identify a larger subgroup of the mammalian ribonuclease superfamily.	Pubmed	0.1471	1000	7.367	72.86	2	2	RNASE2,RNASE3
	12469224	The relationship among the polymorphisms of SULT1A1, 1A2 and different types of cancers in Taiwanese.	Pubmed	0.1471	1000	7.367	72.86	2	2	SULT1A2,SULT1A1
	17601748	Structural determinants of odorant recognition by the human olfactory receptors OR1A1 and OR1A2.	Pubmed	0.1471	1000	7.367	72.86	2	2	OR1A1,OR1A2
	25803307	Annexin A8 identifies a subpopulation of transiently quiescent c-kit positive luminal progenitor cells of the ductal mammary epithelium.	Pubmed	0.1471	1000	7.367	72.86	2	2	ANXA8L1,ANXA8
	32251645	TRIM16 protects from OGD/R-induced oxidative stress in cultured hippocampal neurons by enhancing Nrf2/ARE antioxidant signaling via downregulation of Keap1.	Pubmed	0.1471	1000	7.367	72.86	2	2	TRIM16,TRIM16L
	31145702	Impact of SULT1A3/SULT1A4 genetic polymorphisms on the sulfation of phenylephrine and salbutamol by human SULT1A3 allozymes.	Pubmed	0.1471	1000	7.367	72.86	2	2	SULT1A3,SULT1A4
	2511029	Isolation of early immunoglobulin lambda-like gene transcripts in human fetal liver.	Pubmed	0.1471	1000	7.367	72.86	2	2	GUSBP11,IGLL1
	11483364	Two new genes from the human ATP-binding cassette transporter superfamily, ABCC11 and ABCC12, tandemly duplicated on chromosome 16q12.	Pubmed	0.1471	1000	7.367	72.86	2	2	ABCC11,ABCC12
	10617600	Sulfation of "estrogenic" alkylphenols and 17beta-estradiol by human platelet phenol sulfotransferases.	Pubmed	0.1471	1000	7.367	72.86	2	2	SULT1A2,SULT1A3
	30639733	Olfactory receptor 43 reduces hepatic lipid accumulation and adiposity in mice.	Pubmed	0.1471	1000	7.367	72.86	2	2	OR1A1,OR1A2
	16133548	Genetic polymorphisms and linkage disequilibrium of sulfotransferase SULT1A1 and SULT1A2 in a Korean population: comparison of other ethnic groups.	Pubmed	0.1471	1000	7.367	72.86	2	2	SULT1A2,SULT1A1
	12855582	Eosinophil-derived neurotoxin (EDN), an antimicrobial protein with chemotactic activities for dendritic cells.	Pubmed	0.1471	1000	7.367	72.86	2	2	RNASE2,RNASE3
	8033246	Structural similarity and diversity of sulfotransferases.	Pubmed	0.1471	1000	7.367	72.86	2	2	SULT1A2,SULT1A1
	31916644	Reclassification of a frequent African-origin variant from PMS2 to the pseudogene PMS2CL.	Pubmed	0.1471	1000	7.367	72.86	2	2	PMS2,PMS2CL
	19717523	Eosinophil ribonucleases and their cutaneous lesion-forming activity.	Pubmed	0.1471	1000	7.367	72.86	2	2	RNASE2,RNASE3
	11102386	Sequence variation at two eosinophil-associated ribonuclease loci in humans.	Pubmed	0.1471	1000	7.367	72.86	2	2	RNASE2,RNASE3
	11062482	Loss-of-function mutations in the EGF-CFC gene CFC1 are associated with human left-right laterality defects.	Pubmed	0.1471	1000	7.367	72.86	2	2	CFC1,CFC1B
	24207026	High Dub3 expression in mouse ESCs couples the G1/S checkpoint to pluripotency.	Pubmed	0.1968	1000	9.724	96.16	3	10	USP17L6P,USP17L9P,USP17L15
	16332688	Parkin ubiquitinates and promotes the degradation of RanBP2.	Pubmed	0.1968	1000	9.724	96.16	3	10	UBE2L3,RANBP2,PRKN
	11535246	Human cytosolic sulphotransferases: genetics, characteristics, toxicological aspects.	Pubmed	0.1968	1000	9.724	96.16	3	10	SULT1A2,SULT1A1,SULT1A3
	14614146	A comprehensive analysis of 22q11 gene expression in the developing and adult brain.	Pubmed	0.206	1000	10.13	100.2	5	45	DGCR6,PRODH,BCR,GGT1,GGT3P
	8586419	Genomic organization of the human PMS2 gene family.	Pubmed	0.2682	1000	11.76	116.3	3	11	PMS2P7,PMS2P4,PMS2
	16714300	Biochemical analysis of Parkinson's disease-causing variants of Parkin, an E3 ubiquitin-protein ligase with monoubiquitylation capacity.	Pubmed	0.2682	1000	11.76	116.3	3	11	UBE2L3,AIMP2,PRKN
	8004088	Olfactory receptor gene cluster on human chromosome 17: possible duplication of an ancestral receptor repertoire.	Pubmed	0.2682	1000	11.76	116.3	3	11	OR1G1,OR1D4,OR1D2
	15081110	Odorant and vomeronasal receptor genes in two mouse genome assemblies.	Pubmed	0.2777	1000	11.76	116.3	6	74	OR1A1,OR4K15,OR11G2,OR11H4,OR1A2,OR4L1
	27256505	Neuronal expression of ILEI/FAM3C and its reduction in Alzheimer's disease.	Pubmed	0.2951	1000	11.76	116.3	4	27	GOLGA8N,RAB6A,GOLGA8K,GOLGA8O
	24695638	Cell cycle-dependent expression of Dub3, Nanog and the p160 family of nuclear receptor coactivators (NCoAs) in mouse embryonic stem cells.	Pubmed	0.3544	1000	11.76	116.3	3	12	USP17L6P,USP17L9P,USP17L15
	18391951	Many sequence variants affecting diversity of adult human height.	Pubmed	0.3655	1000	11.76	116.3	8	143	ATAD5,CRLF3,RNF135,IGLL1,ADAP2,BCR,ADAMTS17,ADAMTSL3
	16751776	A germline-specific class of small RNAs binds mammalian Piwi proteins.	Pubmed	0.4096	1000	11.76	116.3	15	447	GOLGA2P7,LRRC37A2,POM121L9P,POM121L8P,LOC643201,GOLGA2P10,LOC100132062,DNM1P46,GOLGA8DP,IGLL1,GOLGA8CP,PDPR,POM121L10P,LINC00265,TPTE2P3
	18036262	Reactive oxygen species and p47phox activation are essential for the Mycobacterium tuberculosis-induced pro-inflammatory response in murine microglia.	Pubmed	0.4325	1000	11.76	116.3	2	3	NCF1C,NCF1B
	10678931	Transient loss of resistance to pulmonary tuberculosis in p47(phox-/-) mice.	Pubmed	0.4325	1000	11.76	116.3	2	3	NCF1C,NCF1B
	27044504	Colitis susceptibility in p47(phox-/-) mice is mediated by the microbiome.	Pubmed	0.4325	1000	11.76	116.3	2	3	NCF1C,NCF1B
	17167081	Suppression of microglial inflammatory activity by myelin phagocytosis: role of p47-PHOX-mediated generation of reactive oxygen species.	Pubmed	0.4325	1000	11.76	116.3	2	3	NCF1C,NCF1B
	28689991	Ubiquitin phosphorylated at Ser57 hyper-activates parkin.	Pubmed	0.4325	1000	11.76	116.3	2	3	UBE2L3,PRKN
	24358335	Mice lacking NCF1 exhibit reduced growth of implanted melanoma and carcinoma tumors.	Pubmed	0.4325	1000	11.76	116.3	2	3	NCF1C,NCF1B
	10891396	Molecular characterization of the mouse p47-phox (Ncf1) gene and comparative analysis of the mouse p47-phox (Ncf1) gene to the human NCF1 gene.	Pubmed	0.4325	1000	11.76	116.3	2	3	NCF1C,NCF1B
	25474113	P47phox-/- mice are compromised in expansion and activation of CD8+ T cells and susceptible to Trypanosoma cruzi infection.	Pubmed	0.4325	1000	11.76	116.3	2	3	NCF1C,NCF1B
	16418170	The molecular circuitry regulating the switch between iron deficiency and overload in mice.	Pubmed	0.4325	1000	11.76	116.3	2	3	ASAH2,ASAH2B
	18787174	NADPH oxidase in bone marrow-derived cells mediates pulmonary ischemia-reperfusion injury.	Pubmed	0.4325	1000	11.76	116.3	2	3	NCF1C,NCF1B
	9466987	A duplicated gene in the breakpoint regions of the 7q11.23 Williams-Beuren syndrome deletion encodes the initiator binding protein TFII-I and BAP-135, a phosphorylation target of BTK.	Pubmed	0.4325	1000	11.76	116.3	2	3	GTF2IP4,GTF2IP1
	26209274	NAD(P)H oxidase subunit p47phox is elevated, and p47phox knockout prevents diaphragm contractile dysfunction in heart failure.	Pubmed	0.4325	1000	11.76	116.3	2	3	NCF1C,NCF1B
	29925039	A splice junction-targeted CRISPR approach (spJCRISPR) reveals human FOXO3B to be a protein-coding gene.	Pubmed	0.4325	1000	11.76	116.3	2	3	ZNF286B,FOXO3B
	24873968	Deficient production of reactive oxygen species leads to severe chronic DSS-induced colitis in Ncf1/p47phox-mutant mice.	Pubmed	0.4325	1000	11.76	116.3	2	3	NCF1C,NCF1B
	22184329	p47(phox) is required for afferent arteriolar contractile responses to angiotensin II and perfusion pressure in mice.	Pubmed	0.4325	1000	11.76	116.3	2	3	NCF1C,NCF1B
	31798959	The Asprosin-OLFR734 hormonal signaling axis modulates male fertility.	Pubmed	0.4325	1000	11.76	116.3	2	3	OR4M1,OR4M2
	22008525	p32 regulates mitochondrial morphology and dynamics through parkin.	Pubmed	0.4325	1000	11.76	116.3	2	3	UBE2L3,PRKN
	25101677	Parkin loss of function contributes to RTP801 elevation and neurodegeneration in Parkinson's disease.	Pubmed	0.4325	1000	11.76	116.3	2	3	UBE2L3,PRKN
	11018074	NADPH oxidase-derived free radicals are key oxidants in alcohol-induced liver disease.	Pubmed	0.4325	1000	11.76	116.3	2	3	NCF1C,NCF1B
	33545139	Natural Loss-of-Function Mutations in Qa2 and NCF1 Cause the Spread of Mannan-Induced Psoriasis.	Pubmed	0.4325	1000	11.76	116.3	2	3	NCF1C,NCF1B
	20142487	Small-molecule screen identifies reactive oxygen species as key regulators of neutrophil chemotaxis.	Pubmed	0.4325	1000	11.76	116.3	2	3	NCF1C,NCF1B
	9116268	Enhanced host defense after gene transfer in the murine p47phox-deficient model of chronic granulomatous disease.	Pubmed	0.4325	1000	11.76	116.3	2	3	NCF1C,NCF1B
	20686129	Mice producing less reactive oxygen species are relatively resistant to collagen glycopeptide vaccination against arthritis.	Pubmed	0.4325	1000	11.76	116.3	2	3	NCF1C,NCF1B
	26170455	Human CLEC18 Gene Cluster Contains C-type Lectins with Differential Glycan-binding Specificity.	Pubmed	0.4325	1000	11.76	116.3	2	3	CLEC18A,CLEC18C
	21570954	Angiotensin II induced catabolic effect and muscle atrophy are redox dependent.	Pubmed	0.4325	1000	11.76	116.3	2	3	NCF1C,NCF1B
	25565313	p47(phox) contributes to albuminuria and kidney fibrosis in mice.	Pubmed	0.4325	1000	11.76	116.3	2	3	NCF1C,NCF1B
	17374743	Ubp43 regulates BCR-ABL leukemogenesis via the type 1 interferon receptor signaling.	Pubmed	0.4325	1000	11.76	116.3	2	3	USP18,BCR
	12958309	Oscillatory shear stress stimulates endothelial production of O2- from p47phox-dependent NAD(P)H oxidases, leading to monocyte adhesion.	Pubmed	0.4325	1000	11.76	116.3	2	3	NCF1C,NCF1B
	11435342	Genetic demonstration of p47phox-dependent superoxide anion production in murine vascular smooth muscle cells.	Pubmed	0.4325	1000	11.76	116.3	2	3	NCF1C,NCF1B
	31118934	Neutrophil Cytosolic Factor 1 in Dendritic Cells Promotes Autoreactive CD8	Pubmed	0.4325	1000	11.76	116.3	2	3	NCF1C,NCF1B
	26746706	Parkin promotes proteasomal degradation of p62: implication of selective vulnerability of neuronal cells in the pathogenesis of Parkinson's disease.	Pubmed	0.4325	1000	11.76	116.3	2	3	UBE2L3,PRKN
	26067475	Sulphation of acetaminophen by the human cytosolic sulfotransferases: a systematic analysis.	Pubmed	0.4325	1000	11.76	116.3	2	3	SULT1A1,SULT1A3
	23482812	Female mice lacking p47phox have altered adipose tissue gene expression and are protected against high fat-induced obesity.	Pubmed	0.4325	1000	11.76	116.3	2	3	NCF1C,NCF1B
	28710279	UbMES and UbFluor: Novel probes for ring-between-ring (RBR) E3 ubiquitin ligase PARKIN.	Pubmed	0.4325	1000	11.76	116.3	2	3	UBE2L3,PRKN
	24859880	SIGLEC-G deficiency increases susceptibility to develop B-cell lymphoproliferative disorders.	Pubmed	0.4325	1000	11.76	116.3	2	3	SIGLEC16,SIGLEC11
	16041040	Virulence comparisons of Aspergillus nidulans mutants are confounded by the inflammatory response of p47phox-/- mice.	Pubmed	0.4325	1000	11.76	116.3	2	3	NCF1C,NCF1B
	10085000	The p47(phox-/-) mouse model of chronic granulomatous disease has normal granuloma formation and cytokine responses to Mycobacterium avium and Schistosoma mansoni eggs.	Pubmed	0.4325	1000	11.76	116.3	2	3	NCF1C,NCF1B
	26613676	Elucidating the Molecular Function of Human BOLA2 in GRX3-Dependent Anamorsin Maturation Pathway.	Pubmed	0.4325	1000	11.76	116.3	2	3	BOLA2B,BOLA2
	10987289	Oxidants from nicotinamide adenine dinucleotide phosphate oxidase are involved in triggering cell proliferation in the liver due to peroxisome proliferators.	Pubmed	0.4325	1000	11.76	116.3	2	3	NCF1C,NCF1B
	16835440	Conserved regulation and role of Pitx2 in situs-specific morphogenesis of visceral organs.	Pubmed	0.4325	1000	11.76	116.3	2	3	CFC1,CFC1B
	21435178	Methamphetamine alters occludin expression via NADPH oxidase-induced oxidative insult and intact caveolae.	Pubmed	0.4325	1000	11.76	116.3	2	3	NCF1C,NCF1B
	24005575	Comprehensive analysis of the transcriptional landscape of the human FMR1 gene reveals two new long noncoding RNAs differentially expressed in Fragile X syndrome and Fragile X-associated tremor/ataxia syndrome.	Pubmed	0.4325	1000	11.76	116.3	2	3	RNASE2,RNASE3
	24966384	Ear2 deletion causes early memory and learning deficits in APP/PS1 mice.	Pubmed	0.4325	1000	11.76	116.3	2	3	RNASE2,RNASE3
	18703411	Intermittent hypoxia has organ-specific effects on oxidative stress.	Pubmed	0.4325	1000	11.76	116.3	2	3	NCF1C,NCF1B
	29228045	Mycobacterial infection induces higher interleukin-1? and dysregulated lung inflammation in mice with defective leukocyte NADPH oxidase.	Pubmed	0.4325	1000	11.76	116.3	2	3	NCF1C,NCF1B
	17307863	Mycobacteria-induced Gr-1+ subsets from distinct myeloid lineages have opposite effects on T cell expansion.	Pubmed	0.4325	1000	11.76	116.3	2	3	NCF1C,NCF1B
	27789755	A Genome-Wide Arrayed cDNA Screen to Identify Functional Modulators of ?7 Nicotinic Acetylcholine Receptors.	Pubmed	0.4325	1000	11.76	116.3	2	3	CHRNA7,SPDYE11
	22155727	Generation of reactive oxygen species (ROS) is a key factor for stimulation of macrophage proliferation by ceramide 1-phosphate.	Pubmed	0.4325	1000	11.76	116.3	2	3	NCF1C,NCF1B
	27829407	Ncf1 affects osteoclast formation but is not critical for postmenopausal bone loss.	Pubmed	0.4325	1000	11.76	116.3	2	3	NCF1C,NCF1B
	24576409	Mechanism of endoplasmic reticulum stress-induced vascular endothelial dysfunction.	Pubmed	0.4325	1000	11.76	116.3	2	3	NCF1C,NCF1B
	22376231	The presence of p47phox in liver parenchymal cells is a key mediator in the pathogenesis of alcoholic liver steatosis.	Pubmed	0.4325	1000	11.76	116.3	2	3	NCF1C,NCF1B
	22238572	Evidence for transcript networks composed of chimeric RNAs in human cells.	Pubmed	0.4325	1000	11.76	116.3	2	3	SPECC1L-ADORA2A,SPECC1L
	23707686	Structure of HHARI, a RING-IBR-RING ubiquitin ligase: autoinhibition of an Ariadne-family E3 and insights into ligation mechanism.	Pubmed	0.4325	1000	11.76	116.3	2	3	UBE2L3,PRKN
	23918780	Leishmania amazonensis amastigotes trigger neutrophil activation but resist neutrophil microbicidal mechanisms.	Pubmed	0.4325	1000	11.76	116.3	2	3	NCF1C,NCF1B
	29223129	The M458L missense mutation disrupts the catalytic properties of Parkin.	Pubmed	0.4325	1000	11.76	116.3	2	3	AIMP2,PRKN
	28274989	NADPH oxidase NOX2 mediates TLR2/6-dependent release of GM-CSF from endothelial cells.	Pubmed	0.4325	1000	11.76	116.3	2	3	NCF1C,NCF1B
	26645958	The p47phox deficiency significantly attenuates the pathogenicity of Chlamydia muridarum in the mouse oviduct but not uterine tissues.	Pubmed	0.4325	1000	11.76	116.3	2	3	NCF1C,NCF1B
	12364355	Role of p47(phox) in vascular oxidative stress and hypertension caused by angiotensin II.	Pubmed	0.4325	1000	11.76	116.3	2	3	NCF1C,NCF1B
	17082908	Specific expression of annexin A8 in adult murine stratified epithelia.	Pubmed	0.4325	1000	11.76	116.3	2	3	ANXA8L1,ANXA8
	9336452	Molecular cloning of four novel murine ribonuclease genes: unusual expansion within the ribonuclease A gene family.	Pubmed	0.4325	1000	11.76	116.3	2	3	RNASE2,RNASE3
	24549323	NADPH oxidase promotes neutrophil extracellular trap formation in pulmonary aspergillosis.	Pubmed	0.4325	1000	11.76	116.3	2	3	NCF1C,NCF1B
	34557202	NOX2-Deficient Neutrophils Facilitate Joint Inflammation Through Higher Pro-Inflammatory and Weakened Immune Checkpoint Activities.	Pubmed	0.4325	1000	11.76	116.3	2	3	NCF1C,NCF1B
	28467721	Reactive Oxygen Species Regulate Both Priming and Established Arthritis, but with Different Mechanisms.	Pubmed	0.4325	1000	11.76	116.3	2	3	NCF1C,NCF1B
	10670582	P47(phox)-deficient NADPH oxidase defect in neutrophils of diabetic mouse strains, C57BL/6J-m db/db and db/+.	Pubmed	0.4325	1000	11.76	116.3	2	3	NCF1C,NCF1B
	20881184	NADPH oxidase deficiency regulates Th lineage commitment and modulates autoimmunity.	Pubmed	0.4325	1000	11.76	116.3	2	3	NCF1C,NCF1B
	29987020	PICK1 inhibits the E3 ubiquitin ligase activity of Parkin and reduces its neuronal protective effect.	Pubmed	0.4325	1000	11.76	116.3	2	3	UBE2L3,PRKN
	26528554	Direct Comparison of a Natural Loss-Of-Function Single Nucleotide Polymorphism with a Targeted Deletion in the Ncf1 Gene Reveals Different Phenotypes.	Pubmed	0.4325	1000	11.76	116.3	2	3	NCF1C,NCF1B
	1577491	Localization of the human eosinophil Charcot-Leyden crystal protein (lysophospholipase) gene (CLC) to chromosome 19 and the human ribonuclease 2 (eosinophil-derived neurotoxin) and ribonuclease 3 (eosinophil cationic protein) genes (RNS2 and RNS3) to chromosome 14.	Pubmed	0.4325	1000	11.76	116.3	2	3	RNASE2,RNASE3
	19052348	The role of reactive oxygen species in immunopathogenesis of rheumatoid arthritis.	Pubmed	0.4325	1000	11.76	116.3	2	3	NCF1C,NCF1B
	20864666	Effect of early particulate air pollution exposure on obesity in mice: role of p47phox.	Pubmed	0.4325	1000	11.76	116.3	2	3	NCF1C,NCF1B
	23328631	Reactive oxygen species delay control of lymphocytic choriomeningitis virus.	Pubmed	0.4325	1000	11.76	116.3	2	3	NCF1C,NCF1B
	15058383	Identification of a purine-rich intronic enhancer element in the mouse eosinophil-associated ribonuclease 2 (mEar 2) gene.	Pubmed	0.4325	1000	11.76	116.3	2	3	RNASE2,RNASE3
	18259693	Genetic polymorphisms in platelet-related proteins and coronary artery disease: investigation of candidate genes, including N-acetylgalactosaminyltransferase 4 (GALNT4) and sulphotransferase 1A1/2 (SULT1A1/2).	Pubmed	0.4325	1000	11.76	116.3	2	3	SULT1A2,SULT1A1
	17114280	Acid aspiration-induced lung inflammation and injury are exacerbated in NADPH oxidase-deficient mice.	Pubmed	0.4325	1000	11.76	116.3	2	3	NCF1C,NCF1B
	31335993	RIPLET, and not TRIM25, is required for endogenous RIG-I-dependent antiviral responses.	Pubmed	0.4325	1000	11.76	116.3	2	3	DDX58,RNF135
	19168575	Participation of mitochondrial respiratory complex III in neutrophil activation and lung injury.	Pubmed	0.4325	1000	11.76	116.3	2	3	NCF1C,NCF1B
	3267213	Linear order of the four BCR-related loci in 22q11.	Pubmed	0.4325	1000	11.76	116.3	2	3	BCRP3,BCRP2
	10888878	Familial Parkinson disease gene product, parkin, is a ubiquitin-protein ligase.	Pubmed	0.4325	1000	11.76	116.3	2	3	UBE2L3,PRKN
	21292769	Parkin ubiquitinates Drp1 for proteasome-dependent degradation: implication of dysregulated mitochondrial dynamics in Parkinson disease.	Pubmed	0.4325	1000	11.76	116.3	2	3	UBE2L3,PRKN
	25989352	B-cell epitope spreading and inflammation in a mouse model of arthritis is associated with a deficiency in reactive oxygen species production.	Pubmed	0.4325	1000	11.76	116.3	2	3	NCF1C,NCF1B
	18656177	Evolutionary forces shape the human RFPL1,2,3 genes toward a role in neocortex development.	Pubmed	0.4325	1000	11.76	116.3	2	3	RFPL2,RFPL1
	21030649	Diversity of human copy number variation and multicopy genes.	Pubmed	0.4325	1000	11.76	116.3	2	3	TBC1D3G,TBC1D3E
	32337066	The Asprosin-OLFR734 module regulates appetitive behaviors.	Pubmed	0.4325	1000	11.76	116.3	2	3	OR4M1,OR4M2
	19503084	NADPH oxidase is the primary source of superoxide induced by NMDA receptor activation.	Pubmed	0.4325	1000	11.76	116.3	2	3	NCF1C,NCF1B
	17404617	Hypoglycemic neuronal death is triggered by glucose reperfusion and activation of neuronal NADPH oxidase.	Pubmed	0.4325	1000	11.76	116.3	2	3	NCF1C,NCF1B
	17332431	Critical role of the NAD(P)H oxidase subunit p47phox for left ventricular remodeling/dysfunction and survival after myocardial infarction.	Pubmed	0.4325	1000	11.76	116.3	2	3	NCF1C,NCF1B
	26196062	Gene structure variation in segmental duplication block C of human chromosome 7q 11.23 during primate evolution.	Pubmed	0.4325	1000	11.76	116.3	2	3	TRIM74,TRIM50
	11156938	Genetic requirement of p47phox for superoxide production by murine microglia.	Pubmed	0.4325	1000	11.76	116.3	2	3	NCF1C,NCF1B
	30504842	Tumour-elicited neutrophils engage mitochondrial metabolism to circumvent nutrient limitations and maintain immune suppression.	Pubmed	0.4325	1000	11.76	116.3	2	3	NCF1C,NCF1B
	27956705	ArfGAP Domain-Containing Protein 2 (ADAP2) Integrates Upstream and Downstream Modules of RIG-I Signaling and Facilitates Type I Interferon Production.	Pubmed	0.4325	1000	11.76	116.3	2	3	DDX58,ADAP2
	10772875	Genomic structure of the human p47-phox (NCF1) gene.	Pubmed	0.4325	1000	11.76	116.3	2	3	NCF1C,NCF1B
	27798190	A Feed-Forward Mechanism Involving the NOX Complex and RyR-Mediated Ca2+ Release During Axonal Specification.	Pubmed	0.4325	1000	11.76	116.3	2	3	NCF1C,NCF1B
	20803549	Identification of a functional hepatocyte nuclear factor 4 binding site in the neutral ceramidase promoter.	Pubmed	0.4325	1000	11.76	116.3	2	3	ASAH2,ASAH2B
	32193420	Mdm2 enhances ligase activity of parkin and facilitates mitophagy.	Pubmed	0.4325	1000	11.76	116.3	2	3	UBE2L3,PRKN
	20702812	Endothelium-dependent coronary vasodilatation requires NADPH oxidase-derived reactive oxygen species.	Pubmed	0.4325	1000	11.76	116.3	2	3	NCF1C,NCF1B
	33705493	Direct interaction of HIV gp120 with neuronal CXCR4 and CCR5 receptors induces cofilin-actin rod pathology via a cellular prion protein- and NOX-dependent mechanism.	Pubmed	0.4325	1000	11.76	116.3	2	3	NCF1C,NCF1B
	23965970	Inhibition of NADPH oxidase by apocynin attenuates progression of atherosclerosis.	Pubmed	0.4325	1000	11.76	116.3	2	3	NCF1C,NCF1B
	18955860	Expression of intestinal and lung alkaline sphingomyelinase and neutral ceramidase in cystic fibrosis f508del transgenic mice.	Pubmed	0.4325	1000	11.76	116.3	2	3	ASAH2,ASAH2B
	12921776	Neutral ceramidase secreted by endothelial cells is released in part associated with caveolin-1.	Pubmed	0.4325	1000	11.76	116.3	2	3	ASAH2,ASAH2B
	26455429	Macrophage-derived reactive oxygen species protects against autoimmune priming with a defined polymeric adjuvant.	Pubmed	0.4325	1000	11.76	116.3	2	3	NCF1C,NCF1B
	15513930	Superoxide generation from Kupffer cells contributes to hepatocarcinogenesis: studies on NADPH oxidase knockout mice.	Pubmed	0.4325	1000	11.76	116.3	2	3	NCF1C,NCF1B
	15626477	Conditional haploinsufficiency of NCF1 (encoding p47(phox)), a signaling gene with a heterozygous phenotype potentially subject to natural selection.	Pubmed	0.4325	1000	11.76	116.3	2	3	NCF1C,NCF1B
	15033459	Phosphoinositide 3-kinase regulates the phosphorylation of NADPH oxidase component p47(phox) by controlling cPKC/PKCdelta but not Akt.	Pubmed	0.4325	1000	11.76	116.3	2	3	NCF1C,NCF1B
	19077231	NCF1 gene and pseudogene pattern: association with parasitic infection and autoimmunity.	Pubmed	0.4325	1000	11.76	116.3	2	3	NCF1C,NCF1B
	24790146	The ligand-binding domain of Siglec-G is crucial for its selective inhibitory function on B1 cells.	Pubmed	0.4325	1000	11.76	116.3	2	3	SIGLEC16,SIGLEC11
	20828610	Neutrophil-derived ROS contribute to oxidative DNA damage induction by quartz particles.	Pubmed	0.4325	1000	11.76	116.3	2	3	NCF1C,NCF1B
	20817944	p47phox Phox homology domain regulates plasma membrane but not phagosome neutrophil NADPH oxidase activation.	Pubmed	0.4325	1000	11.76	116.3	2	3	NCF1C,NCF1B
	22319452	Reduction of NADPH-oxidase activity ameliorates the cardiovascular phenotype in a mouse model of Williams-Beuren Syndrome.	Pubmed	0.4325	1000	11.76	116.3	2	3	NCF1C,NCF1B
	16895801	Early determinants of H2O2-induced endothelial dysfunction.	Pubmed	0.4325	1000	11.76	116.3	2	3	NCF1C,NCF1B
	20690191	Role and cellular source of nicotinamide adenine dinucleotide phosphate oxidase in hepatic fibrosis.	Pubmed	0.4325	1000	11.76	116.3	2	3	NCF1C,NCF1B
	16772302	Endosomal acidification and activation of NADPH oxidase isoforms are upstream events in hyperosmolarity-induced hepatocyte apoptosis.	Pubmed	0.4325	1000	11.76	116.3	2	3	NCF1C,NCF1B
	31668704	The Human-Specific BOLA2 Duplication Modifies Iron Homeostasis and Anemia Predisposition in Chromosome 16p11.2 Autism Individuals.	Pubmed	0.4325	1000	11.76	116.3	2	3	BOLA2B,BOLA2
	17101985	Evolution and expression of chimeric POTE-actin genes in the human genome.	Pubmed	0.4325	1000	11.76	116.3	2	3	POTEF,POTEJ
	32504071	Aging increases vulnerability to stress-induced depression via upregulation of NADPH oxidase in mice.	Pubmed	0.4325	1000	11.76	116.3	2	3	NCF1C,NCF1B
	16280459	Effect of p47phox gene deletion on ROS production and oxygen sensing in mouse carotid body chemoreceptor cells.	Pubmed	0.4325	1000	11.76	116.3	2	3	NCF1C,NCF1B
	18185592	Defective tryptophan catabolism underlies inflammation in mouse chronic granulomatous disease.	Pubmed	0.4325	1000	11.76	116.3	2	3	NCF1C,NCF1B
	32910989	Iron-sulfur cluster biogenesis, trafficking, and signaling: Roles for CGFS glutaredoxins and BolA proteins.	Pubmed	0.4325	1000	11.76	116.3	2	3	BOLA2B,BOLA2
	7961757	Structure of human estrogen and aryl sulfotransferase gene. Two mRNA species issued from a single gene.	Pubmed	0.4325	1000	11.76	116.3	2	3	SULT1A3,SULT1A4
	23024271	Prolonged production of reactive oxygen species in response to B cell receptor stimulation promotes B cell activation and proliferation.	Pubmed	0.4325	1000	11.76	116.3	2	3	NCF1C,NCF1B
	22419166	Primate segmental duplication creates novel promoters for the LRRC37 gene family within the 17q21.31 inversion polymorphism region.	Pubmed	0.4325	1000	11.76	116.3	2	3	LRRC37A2,LRRC37A
	21253614	Ncf1 (p47phox) is essential for direct regulatory T cell mediated suppression of CD4+ effector T cells.	Pubmed	0.4325	1000	11.76	116.3	2	3	NCF1C,NCF1B
	25873172	Synergistic innate and adaptive immune response to combination immunotherapy with anti-tumor antigen antibodies and extended serum half-life IL-2.	Pubmed	0.4325	1000	11.76	116.3	2	3	NCF1C,NCF1B
	24039991	In silico mechanistic profiling to probe small molecule binding to sulfotransferases.	Pubmed	0.4325	1000	11.76	116.3	2	3	SULT1A1,SULT1A3
	15310853	Enhanced autoimmunity, arthritis, and encephalomyelitis in mice with a reduced oxidative burst due to a mutation in the Ncf1 gene.	Pubmed	0.4325	1000	11.76	116.3	2	3	NCF1C,NCF1B
	31393787	Exogenous PP2A inhibitor exacerbates the progression of nonalcoholic fatty liver disease via NOX2-dependent activation of miR21.	Pubmed	0.4325	1000	11.76	116.3	2	3	NCF1C,NCF1B
	10725280	Vascular effects following homozygous disruption of p47(phox) : An essential component of NADPH oxidase.	Pubmed	0.4325	1000	11.76	116.3	2	3	NCF1C,NCF1B
	34970267	Governs Immune Niches in the Lung to Mediate Pulmonary Inflammation in Mice.	Pubmed	0.4325	1000	11.76	116.3	2	3	NCF1C,NCF1B
	25689796	Germ-free mice deficient of reactive oxygen species have increased arthritis susceptibility.	Pubmed	0.4325	1000	11.76	116.3	2	3	NCF1C,NCF1B
	11948212	Divergent origins and concerted expansion of two segmental duplications on chromosome 16.	Pubmed	0.4325	1000	11.76	116.3	2	3	NPIPB5,NPIPB3
	11590439	Parkin ubiquitinates the alpha-synuclein-interacting protein, synphilin-1: implications for Lewy-body formation in Parkinson disease.	Pubmed	0.4325	1000	11.76	116.3	2	3	UBE2L3,PRKN
	16049031	Familial-associated mutations differentially disrupt the solubility, localization, binding and ubiquitination properties of parkin.	Pubmed	0.4325	1000	11.76	116.3	2	3	AIMP2,PRKN
	14993144	Opposing roles of p47phox in basal versus angiotensin II-stimulated alterations in vascular O2- production, vascular tone, and mitogen-activated protein kinase activation.	Pubmed	0.4325	1000	11.76	116.3	2	3	NCF1C,NCF1B
	22050439	Inhibition of NADPH oxidase promotes alternative and anti-inflammatory microglial activation during neuroinflammation.	Pubmed	0.4325	1000	11.76	116.3	2	3	NCF1C,NCF1B
	12031896	The vascular NADPH oxidase subunit p47phox is involved in redox-mediated gene expression.	Pubmed	0.4325	1000	11.76	116.3	2	3	NCF1C,NCF1B
	17572677	Siglec-G is a B1 cell-inhibitory receptor that controls expansion and calcium signaling of the B1 cell population.	Pubmed	0.4325	1000	11.76	116.3	2	3	SIGLEC16,SIGLEC11
	11249873	NAD(P)H oxidase-derived superoxide mediates hypercholesterolemia-induced leukocyte-endothelial cell adhesion.	Pubmed	0.4325	1000	11.76	116.3	2	3	NCF1C,NCF1B
	15936744	Ncf1 (p47phox) polymorphism determines oxidative burst and the severity of arthritis in rats and mice.	Pubmed	0.4325	1000	11.76	116.3	2	3	NCF1C,NCF1B
	2573352	Different gamma-glutamyl transpeptidase mRNAs are expressed in human liver and kidney.	Pubmed	0.4325	1000	11.76	116.3	2	3	GGT1,GGT3P
	16336259	The C-type lectin-like domain superfamily.	Pubmed	0.4325	1000	11.76	116.3	2	3	CLEC18A,CLEC18C
	23836061	Copresentation of antigen and ligands of Siglec-G induces B cell tolerance independent of CD22.	Pubmed	0.4325	1000	11.76	116.3	2	3	SIGLEC16,SIGLEC11
	26455829	Genotypes of CYP1A1,?SULT1A1 and SULT1A2 and risk of squamous cell carcinoma of esophagus: outcome of a case-control study from Kashmir, India.	Pubmed	0.4325	1000	11.76	116.3	2	3	SULT1A2,SULT1A1
	17220182	NADPH oxidase modulates myocardial Akt, ERK1/2 activation, and angiogenesis after hypoxia-reoxygenation.	Pubmed	0.4325	1000	11.76	116.3	2	3	NCF1C,NCF1B
	33603190	Endosomal TLR3 co-receptor CLEC18A enhances host immune response to viral infection.	Pubmed	0.4325	1000	11.76	116.3	2	3	CLEC18A,CLEC18C
	25628043	NADPH oxidase p47phox siRNA attenuates adventitial fibroblasts proliferation and migration in apoE(-/-) mouse.	Pubmed	0.4325	1000	11.76	116.3	2	3	NCF1C,NCF1B
	22309771	Human glutaredoxin 3 forms [2Fe-2S]-bridged complexes with human BolA2.	Pubmed	0.4325	1000	11.76	116.3	2	3	BOLA2B,BOLA2
	23271121	Eosinophil cationic protein enhances stabilization of ?-catenin during cardiomyocyte differentiation in P19CL6 embryonal carcinoma cells.	Pubmed	0.4325	1000	11.76	116.3	2	3	RNASE2,RNASE3
	7650482	The p47phox mouse knock-out model of chronic granulomatous disease.	Pubmed	0.4325	1000	11.76	116.3	2	3	NCF1C,NCF1B
	12868577	Disseminated trichosporonosis in a murine model of chronic granulomatous disease.	Pubmed	0.4325	1000	11.76	116.3	2	3	NCF1C,NCF1B
	12560337	Mechanism of endothelial cell NADPH oxidase activation by angiotensin II. Role of the p47phox subunit.	Pubmed	0.4325	1000	11.76	116.3	2	3	NCF1C,NCF1B
	20859296	NADPH oxidase mediates striatal neuronal injury after transient global cerebral ischemia.	Pubmed	0.4325	1000	11.76	116.3	2	3	NCF1C,NCF1B
	16109921	p47phox-dependent NADPH oxidase regulates flow-induced vascular remodeling.	Pubmed	0.4325	1000	11.76	116.3	2	3	NCF1C,NCF1B
	19381132	Reactive oxygen species modulate growth of cerebral aneurysms: a study using the free radical scavenger edaravone and p47phox(-/-) mice.	Pubmed	0.4325	1000	11.76	116.3	2	3	NCF1C,NCF1B
	16724810	Genetics of autoimmune diseases: a multistep process.	Pubmed	0.4325	1000	11.76	116.3	2	3	NCF1C,NCF1B
	22575681	Neutrophils augment LPS-mediated pro-inflammatory signaling in human lung epithelial cells.	Pubmed	0.4325	1000	11.76	116.3	2	3	NCF1C,NCF1B
	12176908	Identification of a novel NCF-1 (p47-phox) pseudogene not containing the signature GT deletion: significance for A47 degrees chronic granulomatous disease carrier detection.	Pubmed	0.4325	1000	11.76	116.3	2	3	NCF1C,NCF1B
	24691167	The Copper Metabolism MURR1 domain protein 1 (COMMD1) modulates the aggregation of misfolded protein species in a client-specific manner.	Pubmed	0.4325	1000	11.76	116.3	2	3	COMMD1,PRKN
	25288672	Loss of NADPH oxidase-derived superoxide skews macrophage phenotypes to delay type 1 diabetes.	Pubmed	0.4325	1000	11.76	116.3	2	3	NCF1C,NCF1B
	17641008	Lack of reactive oxygen species breaks T cell tolerance to collagen type II and allows development of arthritis in mice.	Pubmed	0.4325	1000	11.76	116.3	2	3	NCF1C,NCF1B
	9329953	A p47-phox pseudogene carries the most common mutation causing p47-phox- deficient chronic granulomatous disease.	Pubmed	0.4325	1000	11.76	116.3	2	3	NCF1C,NCF1B
	19411313	Hyperoxia impairs postnatal alveolar epithelial development via NADPH oxidase in newborn mice.	Pubmed	0.4325	1000	11.76	116.3	2	3	NCF1C,NCF1B
	12688546	Dependence of liver injury after hemorrhage/resuscitation in mice on NADPH oxidase-derived superoxide.	Pubmed	0.4325	1000	11.76	116.3	2	3	NCF1C,NCF1B
	10799876	Superoxide prevents nitric oxide-mediated suppression of helper T lymphocytes: decreased autoimmune encephalomyelitis in nicotinamide adenine dinucleotide phosphate oxidase knockout mice.	Pubmed	0.4325	1000	11.76	116.3	2	3	NCF1C,NCF1B
	19946270	Somatic mutations of the Parkinson's disease-associated gene PARK2 in glioblastoma and other human malignancies.	Pubmed	0.4325	1000	11.76	116.3	2	3	UBE2L3,PRKN
	16843452	Critical role for p47phox in renin-angiotensin system activation and blood pressure regulation.	Pubmed	0.4325	1000	11.76	116.3	2	3	NCF1C,NCF1B
	2530088	Vascular anticoagulant beta: a novel human Ca2+/phospholipid binding protein that inhibits coagulation and phospholipase A2 activity. Its molecular cloning, expression and comparison with VAC-alpha.	Pubmed	0.4325	1000	11.76	116.3	2	3	ANXA8L1,ANXA8
	24970888	Molecular insights of p47phox phosphorylation dynamics in the regulation of NADPH oxidase activation and superoxide production.	Pubmed	0.4325	1000	11.76	116.3	2	3	NCF1C,NCF1B
	18425380	Inhibition of NADPH oxidase activity promotes differentiation of B16 melanoma cells.	Pubmed	0.4325	1000	11.76	116.3	2	3	NCF1C,NCF1B
	11834706	Essential role of the NADPH oxidase subunit p47(phox) in endothelial cell superoxide production in response to phorbol ester and tumor necrosis factor-alpha.	Pubmed	0.4325	1000	11.76	116.3	2	3	NCF1C,NCF1B
	23911657	A glucose-6-phosphate isomerase peptide induces T and B cell-dependent chronic arthritis in C57BL/10 mice: arthritis without reactive oxygen species and complement.	Pubmed	0.4325	1000	11.76	116.3	2	3	NCF1C,NCF1B
	23307929	Accumulation of the parkin substrate, FAF1, plays a key role in the dopaminergic neurodegeneration.	Pubmed	0.4325	1000	11.76	116.3	2	3	UBE2L3,PRKN
	30045841	A model of chronic enthesitis and new bone formation characterized by multimodal imaging.	Pubmed	0.4325	1000	11.76	116.3	2	3	NCF1C,NCF1B
	19635825	Virulence and cellular interactions of Burkholderia multivorans in chronic granulomatous disease.	Pubmed	0.4325	1000	11.76	116.3	2	3	NCF1C,NCF1B
	22872646	TRIM50 protein regulates vesicular trafficking for acid secretion in gastric parietal cells.	Pubmed	0.4325	1000	11.76	116.3	2	3	TRIM74,TRIM50
	17310103	Hydrophobic bile salts induce hepatocyte shrinkage via NADPH oxidase activation.	Pubmed	0.4325	1000	11.76	116.3	2	3	NCF1C,NCF1B
	28055014	Globozoospermia and lack of acrosome formation in GM130-deficient mice.	Pubmed	0.4566	1000	12.24	121	3	13	GOLGA8N,GOLGA8K,GOLGA8O
	10843809	A common set of at least 11 functional genes is lost in the majority of NF1 patients with gross deletions.	Pubmed	0.4566	1000	12.24	121	3	13	ATAD5,ADAP2,TEFM
	32873390	Loss of GM130 does not impair oocyte meiosis and embryo development in mice.	Pubmed	0.4566	1000	12.24	121	3	13	GOLGA8N,GOLGA8K,GOLGA8O
	21552007	GM130, a cis-Golgi protein, regulates meiotic spindle assembly and asymmetric division in mouse oocyte.	Pubmed	0.4566	1000	12.24	121	3	13	GOLGA8N,GOLGA8K,GOLGA8O
	29128360	GOLGA2 loss causes fibrosis with autophagy in the mouse lung and liver.	Pubmed	0.4566	1000	12.24	121	3	13	GOLGA8N,GOLGA8K,GOLGA8O
	28028212	Loss of the golgin GM130 causes Golgi disruption, Purkinje neuron loss, and ataxia in mice.	Pubmed	0.4566	1000	12.24	121	3	13	GOLGA8N,GOLGA8K,GOLGA8O
	17662146	Integrative characterization of germ cell-specific genes from mouse spermatocyte UniGene library.	Pubmed	0.5759	1000	15.21	150.4	3	14	RIMBP3,RIMBP3B,RIMBP3C
	30630895	GM130 and p115 play a key role in the organisation of the early secretory pathway during skeletal muscle differentiation.	Pubmed	0.5759	1000	15.21	150.4	3	14	GOLGA8N,GOLGA8K,GOLGA8O
	27226319	Golgb1 regulates protein glycosylation and is crucial for mammalian palate development.	Pubmed	0.5759	1000	15.21	150.4	3	14	GOLGA8N,GOLGA8K,GOLGA8O
	20686608	Genome-wide association study of pancreatic cancer in Japanese population.	Pubmed	0.5759	1000	15.21	150.4	3	14	PRPSAP2,LOC101929141,PRKN
	11793228	ES cell neural differentiation reveals a substantial number of novel ESTs.	Pubmed	0.5759	1000	15.21	150.4	3	14	USP17L6P,USP17L9P,USP17L15
	33543287	Oligoasthenoteratospermia and sperm tail bending in PPP4C-deficient mice.	Pubmed	0.5759	1000	15.21	150.4	3	14	GOLGA8N,GOLGA8K,GOLGA8O
	20096683	A mutation in the pericentrin gene causes abnormal interneuron migration to the olfactory bulb in mice.	Pubmed	0.5776	1000	15.22	150.5	5	56	BCR,GGT1,GGT3P,GGT5,SPECC1L
	18632753	Bladder cancer risk and genetic variation in AKR1C3 and other metabolizing genes.	Pubmed	0.7135	1000	16.6	164.2	3	15	AKR1C3,SULT1A2,SULT1A1
	26165940	GM130 Regulates Golgi-Derived Spindle Assembly by Activating TPX2 and Capturing Microtubules.	Pubmed	0.7135	1000	16.6	164.2	3	15	GOLGA8N,GOLGA8K,GOLGA8O
	17204322	Calumin, a novel Ca2+-binding transmembrane protein on the endoplasmic reticulum.	Pubmed	0.7135	1000	16.6	164.2	3	15	GOLGA8N,GOLGA8K,GOLGA8O
	16824795	Identification of a novel actin isoform in hepatocellular carcinoma.	Pubmed	0.7135	1000	16.6	164.2	3	15	POTEF,POTEJ,POTEI
	16413118	Demonstration of the expression and the enzymatic activity of N-acetylglucosaminyltransferase IX in the mouse brain.	Pubmed	0.7135	1000	16.6	164.2	3	15	GOLGA8N,GOLGA8K,GOLGA8O
	23185636	Golgi disruption and early embryonic lethality in mice lacking USO1.	Pubmed	0.7135	1000	16.6	164.2	3	15	GOLGA8N,GOLGA8K,GOLGA8O
	28892079	Retriever is a multiprotein complex for retromer-independent endosomal cargo recycling.	Pubmed	0.7135	1000	16.6	164.2	3	15	COMMD1,VPS35,WASHC2A
	17046993	The a3 isoform of V-ATPase regulates insulin secretion from pancreatic beta-cells.	Pubmed	0.7135	1000	16.6	164.2	3	15	GOLGA8N,GOLGA8K,GOLGA8O
	17189423	Mouse oocytes within germ cell cysts and primordial follicles contain a Balbiani body.	Pubmed	0.7135	1000	16.6	164.2	3	15	GOLGA8N,GOLGA8K,GOLGA8O
	26083584	RhoA-mediated FMNL1 regulates GM130 for actin assembly and phosphorylates MAPK for spindle formation in mouse oocyte meiosis.	Pubmed	0.7135	1000	16.6	164.2	3	15	GOLGA8N,GOLGA8K,GOLGA8O
	28509431	Golga5 is dispensable for mouse embryonic development and postnatal survival.	Pubmed	0.7135	1000	16.6	164.2	3	15	GOLGA8N,GOLGA8K,GOLGA8O
	20546612	The role of height-associated loci identified in genome wide association studies in the determination of pediatric stature.	Pubmed	0.8413	1000	16.6	164.2	6	91	ATAD5,CRLF3,RNF135,ADAP2,ADAMTS17,ADAMTSL3
	14718656	Solution structure of a BolA-like protein from Mus musculus.	Pubmed	0.8581	1000	16.6	164.2	2	4	BOLA2B,BOLA2
	17912374	Siglecg limits the size of B1a B cell lineage by down-regulating NFkappaB activation.	Pubmed	0.8581	1000	16.6	164.2	2	4	SIGLEC16,SIGLEC11
	28469175	Ube2D3 and Ube2N are essential for RIG-I-mediated MAVS aggregation in antiviral innate immunity.	Pubmed	0.8581	1000	16.6	164.2	2	4	DDX58,RNF135
	19734205	Exogenous pentraxin 3 restores antifungal resistance and restrains inflammation in murine chronic granulomatous disease.	Pubmed	0.8581	1000	16.6	164.2	2	4	NCF1C,NCF1B
	16679392	Angiopoietin-1-induced angiogenesis is modulated by endothelial NADPH oxidase.	Pubmed	0.8581	1000	16.6	164.2	2	4	NCF1C,NCF1B
	21285291	Enhanced susceptibility to biomechanical stress in ACE2 null mice is prevented by loss of the p47(phox) NADPH oxidase subunit.	Pubmed	0.8581	1000	16.6	164.2	2	4	NCF1C,NCF1B
	31432739	USP33 deubiquitinates PRKN/parkin and antagonizes its role in mitophagy.	Pubmed	0.8581	1000	16.6	164.2	2	4	UBE2L3,PRKN
	23271700	Identification of a region in p47phox/NCF1 crucial for phagocytic NADPH oxidase (NOX2) activation.	Pubmed	0.8581	1000	16.6	164.2	2	4	NCF1C,NCF1B
	19095958	p47phox deficiency induces macrophage dysfunction resulting in progressive crystalline macrophage pneumonia.	Pubmed	0.8581	1000	16.6	164.2	2	4	NCF1C,NCF1B
	16847341	Synaptic plasticity deficits and mild memory impairments in mouse models of chronic granulomatous disease.	Pubmed	0.8581	1000	16.6	164.2	2	4	NCF1C,NCF1B
	20083677	Nox activator 1: a potential target for modulation of vascular reactive oxygen species in atherosclerotic arteries.	Pubmed	0.8581	1000	16.6	164.2	2	4	NCF1C,NCF1B
	29995846	Mechanism of parkin activation by PINK1.	Pubmed	0.8581	1000	16.6	164.2	2	4	UBE2L3,PRKN
	20038598	Decoration of T-independent antigen with ligands for CD22 and Siglec-G can suppress immunity and induce B cell tolerance in vivo.	Pubmed	0.8581	1000	16.6	164.2	2	4	SIGLEC16,SIGLEC11
	23846495	Cyclophilin A is required for angiotensin II-induced p47phox translocation to caveolae in vascular smooth muscle cells.	Pubmed	0.8581	1000	16.6	164.2	2	4	NCF1C,NCF1B
	20200274	CD22 x Siglec-G double-deficient mice have massively increased B1 cell numbers and develop systemic autoimmunity.	Pubmed	0.8581	1000	16.6	164.2	2	4	SIGLEC16,SIGLEC11
	29127146	Cutting Edge: Processing of Oxidized Peptides in Macrophages Regulates T Cell Activation and Development of Autoimmune Arthritis.	Pubmed	0.8581	1000	16.6	164.2	2	4	NCF1C,NCF1B
	22118627	Astroglial NF-?B mediates oxidative stress by regulation of NADPH oxidase in a model of retinal ischemia reperfusion injury.	Pubmed	0.8581	1000	16.6	164.2	2	4	NCF1C,NCF1B
	32983119	The Ubiquitin E3 Ligase Parkin Inhibits Innate Antiviral Immunity Through K48-Linked Polyubiquitination of RIG-I and MDA5.	Pubmed	0.8581	1000	16.6	164.2	2	4	DDX58,PRKN
	15258578	T cells express a phagocyte-type NADPH oxidase that is activated after T cell receptor stimulation.	Pubmed	0.8581	1000	16.6	164.2	2	4	NCF1C,NCF1B
	10647999	Cloning and expression of bovine p47-phox and p67-phox: comparison with the human and murine homologs.	Pubmed	0.8581	1000	16.6	164.2	2	4	NCF1C,NCF1B
	20729333	Siglec-G regulates B1 cell survival and selection.	Pubmed	0.8581	1000	16.6	164.2	2	4	SIGLEC16,SIGLEC11
	17380558	NADPH oxidase is required for neutrophil-dependent autoantibody-induced tissue damage.	Pubmed	0.8581	1000	16.6	164.2	2	4	NCF1C,NCF1B
	24623132	TNFR1/phox interaction and TNFR1 mitochondrial translocation Thwart silica-induced pulmonary fibrosis.	Pubmed	0.8581	1000	16.6	164.2	2	4	NCF1C,NCF1B
	25583483	STEP61 is a substrate of the E3 ligase parkin and is upregulated in Parkinson's disease.	Pubmed	0.8581	1000	16.6	164.2	2	4	UBE2L3,PRKN
	23467347	Membrane trafficking of NADPH oxidase p47(phox) in paraventricular hypothalamic neurons parallels local free radical production in angiotensin II slow-pressor hypertension.	Pubmed	0.8581	1000	16.6	164.2	2	4	NCF1C,NCF1B
	12496167	Phagocyte NADPH oxidase, but not inducible nitric oxide synthase, is essential for early control of Burkholderia cepacia and chromobacterium violaceum infection in mice.	Pubmed	0.8581	1000	16.6	164.2	2	4	NCF1C,NCF1B
	32276661	Independent and inter-dependent immunoregulatory effects of NCF1 and NOS2 in experimental autoimmune encephalomyelitis.	Pubmed	0.8581	1000	16.6	164.2	2	4	NCF1C,NCF1B
	29158420	Superoxide Production by NADPH Oxidase Intensifies Macrophage Antiviral Responses during Diabetogenic Coxsackievirus Infection.	Pubmed	0.8581	1000	16.6	164.2	2	4	NCF1C,NCF1B
	26269022	Loss of NOX-Derived Superoxide Exacerbates Diabetogenic CD4 T-Cell Effector Responses in Type 1 Diabetes.	Pubmed	0.8581	1000	16.6	164.2	2	4	NCF1C,NCF1B
	16709836	The mannose receptor mediates uptake of soluble but not of cell-associated antigen for cross-presentation.	Pubmed	0.8581	1000	16.6	164.2	2	4	CLEC18A,CLEC18C
	11978965	Characterization of two novel genes, WBSCR20 and WBSCR22, deleted in Williams-Beuren syndrome.	Pubmed	0.8581	1000	16.6	164.2	2	4	NSUN5P2,NSUN5
	17823367	Atherosclerosis is attenuated by limiting superoxide generation in both macrophages and vessel wall cells.	Pubmed	0.8581	1000	16.6	164.2	2	4	NCF1C,NCF1B
	24608112	Reactive oxygen species prevent imiquimod-induced psoriatic dermatitis through enhancing regulatory T cell function.	Pubmed	0.8581	1000	16.6	164.2	2	4	NCF1C,NCF1B
	30130433	Aggregated neutrophil extracellular traps resolve inflammation by proteolysis of cytokines and chemokines and protection from antiproteases.	Pubmed	0.8581	1000	16.6	164.2	2	4	NCF1C,NCF1B
	17526748	Transcriptome analysis of murine macrophages in response to infection with Streptococcus pyogenes reveals an unusual activation program.	Pubmed	0.8581	1000	16.6	164.2	2	4	NCF1C,NCF1B
	21209200	Novel regulation of parkin function through c-Abl-mediated tyrosine phosphorylation: implications for Parkinson's disease.	Pubmed	0.8581	1000	16.6	164.2	2	4	UBE2L3,PRKN
	20370567	5-Lipoxygenase plays an essential role in 4-HNE-enhanced ROS production in murine macrophages via activation of NADPH oxidase.	Pubmed	0.8581	1000	16.6	164.2	2	4	NCF1C,NCF1B
	19553535	Ncf1-associated reduced oxidative burst promotes IL-33R+ T cell-mediated adjuvant-free arthritis in mice.	Pubmed	0.8581	1000	16.6	164.2	2	4	NCF1C,NCF1B
	25559186	TRP channel-associated factors are a novel protein family that regulates TRPM8 trafficking and activity.	Pubmed	0.8581	1000	16.6	164.2	2	4	TCAF2,TCAF1
	19168729	Peroxide generation by p47phox-Src activation of Nox2 has a key role in protein kinase C-induced arterial smooth muscle contraction.	Pubmed	0.8581	1000	16.6	164.2	2	4	NCF1C,NCF1B
	19608974	Knockout of p47 phox uncovers a critical role of p40 phox in reactive oxygen species production in microvascular endothelial cells.	Pubmed	0.8581	1000	16.6	164.2	2	4	NCF1C,NCF1B
	23727886	Structure of the human Parkin ligase domain in an autoinhibited state.	Pubmed	0.8581	1000	16.6	164.2	2	4	UBE2L3,PRKN
	9324362	Listeriosis in p47(phox-/-) and TRp55-/- mice: protection despite absence of ROI and susceptibility despite presence of RNI.	Pubmed	0.8581	1000	16.6	164.2	2	4	NCF1C,NCF1B
	11705910	Role for inducible nitric oxide synthase in protection from chronic Chlamydia trachomatis urogenital disease in mice and its regulation by oxygen free radicals.	Pubmed	0.8581	1000	16.6	164.2	2	4	NCF1C,NCF1B
	23553616	Loss of p47phox subunit enhances susceptibility to biomechanical stress and heart failure because of dysregulation of cortactin and actin filaments.	Pubmed	0.8581	1000	16.6	164.2	2	4	NCF1C,NCF1B
	22547702	Protective role of reactive oxygen species in endotoxin-induced lung inflammation through modulation of IL-10 expression.	Pubmed	0.8581	1000	16.6	164.2	2	4	NCF1C,NCF1B
	22361747	Dysregulated TLR3-dependent signaling and innate immune activation in superoxide-deficient macrophages from nonobese diabetic mice.	Pubmed	0.8581	1000	16.6	164.2	2	4	NCF1C,NCF1B
	25989356	NADPH Oxidase-Derived Peroxynitrite Drives Inflammation in Mice and Human Nonalcoholic Steatohepatitis via TLR4-Lipid Raft Recruitment.	Pubmed	0.8581	1000	16.6	164.2	2	4	NCF1C,NCF1B
	29695496	oxLDL-mediated cellular senescence is associated with increased NADPH oxidase p47phox recruitment to caveolae.	Pubmed	0.8581	1000	16.6	164.2	2	4	NCF1C,NCF1B
	11825688	Cripto in tumors and embryo development.	Pubmed	0.8581	1000	16.6	164.2	2	4	CFC1,CFC1B
	30143587	Sialic Acid Ligand Binding of CD22 and Siglec-G Determines Distinct B Cell Functions but Is Dispensable for B Cell Tolerance Induction.	Pubmed	0.8581	1000	16.6	164.2	2	4	SIGLEC16,SIGLEC11
	15670768	Angiotensin II induces MMP-2 in a p47phox-dependent manner.	Pubmed	0.8581	1000	16.6	164.2	2	4	NCF1C,NCF1B
	25375667	Phosphorylation by PINK1 releases the UBL domain and initializes the conformational opening of the E3 ubiquitin ligase Parkin.	Pubmed	0.8581	1000	16.6	164.2	2	4	UBE2L3,PRKN
	26076008	Methylcholanthrene-Induced Sarcomas Develop Independently from NOX2-Derived ROS.	Pubmed	0.8581	1000	16.6	164.2	2	4	NCF1C,NCF1B
	20802176	The role of vascular endothelial growth factor-induced activation of NADPH oxidase in choroidal endothelial cells and choroidal neovascularization.	Pubmed	0.8581	1000	16.6	164.2	2	4	NCF1C,NCF1B
	19546249	Cytokine-dependent regulation of NADPH oxidase activity and the consequences for activated T cell homeostasis.	Pubmed	0.8581	1000	16.6	164.2	2	4	NCF1C,NCF1B
	18548201	hBolA, novel non-classical secreted proteins, belonging to different BolA family with functional divergence.	Pubmed	0.8581	1000	16.6	164.2	2	4	BOLA2B,BOLA2
	27798263	Cancer cells induce metastasis-supporting neutrophil extracellular DNA traps.	Pubmed	0.8581	1000	16.6	164.2	2	4	NCF1C,NCF1B
	23509361	Monocyte- and macrophage-targeted NADPH oxidase mediates antifungal host defense and regulation of acute inflammation in mice.	Pubmed	0.8581	1000	16.6	164.2	2	4	NCF1C,NCF1B
	16339143	Diverse effects of pathogenic mutations of Parkin that catalyze multiple monoubiquitylation in vitro.	Pubmed	0.8581	1000	16.6	164.2	2	4	UBE2L3,PRKN
	2393022	Genes for two autosomal recessive forms of chronic granulomatous disease assigned to 1q25 (NCF2) and 7q11.23 (NCF1).	Pubmed	0.8581	1000	16.6	164.2	2	4	NCF1C,NCF1B
	30036931	Formation of a Family of Long Intergenic Noncoding RNA Genes with an Embedded Translocation Breakpoint Motif in Human Chromosomal Low Copy Repeats of 22q11.2-Some Surprises and Questions.	Pubmed	0.8581	1000	16.6	164.2	2	4	FAM230B,FAM230A
	25922068	p47phox-Nox2-dependent ROS Signaling Inhibits Early Bone Development in Mice but Protects against Skeletal Aging.	Pubmed	0.8581	1000	16.6	164.2	2	4	NCF1C,NCF1B
	23948215	Neuronal nitric oxide synthase and NADPH oxidase interact to affect cognitive, affective, and social behaviors in mice.	Pubmed	0.8581	1000	16.6	164.2	2	4	NCF1C,NCF1B
	24633549	Nox2 and p47(phox) modulate compensatory growth of primary collateral arteries.	Pubmed	0.8581	1000	16.6	164.2	2	4	NCF1C,NCF1B
	19595722	Drosophila MUS312 and the vertebrate ortholog BTBD12 interact with DNA structure-specific endonucleases in DNA repair and recombination.	Pubmed	0.8581	1000	16.6	164.2	2	4	SLX1B,SLX1A
	25188296	Bacillus calmette-guerin infection in NADPH oxidase deficiency: defective mycobacterial sequestration and granuloma formation.	Pubmed	0.8581	1000	16.6	164.2	2	4	NCF1C,NCF1B
	22222227	p47(phox) directs murine macrophage cell fate decisions.	Pubmed	0.8581	1000	16.6	164.2	2	4	NCF1C,NCF1B
	23454539	NADPH-oxidase 2 activation promotes opioid-induced antinociceptive tolerance in mice.	Pubmed	0.8581	1000	16.6	164.2	2	4	NCF1C,NCF1B
	14507659	Deficiency of NADPH oxidase components p47phox and gp91phox caused granulomatous synovitis and increased connective tissue destruction in experimental arthritis models.	Pubmed	0.8581	1000	16.6	164.2	2	4	NCF1C,NCF1B
	11278816	Features of the parkin/ariadne-like ubiquitin ligase, HHARI, that regulate its interaction with the ubiquitin-conjugating enzyme, Ubch7.	Pubmed	0.8581	1000	16.6	164.2	2	4	UBE2L3,PRKN
	11078524	Parkin functions as an E2-dependent ubiquitin- protein ligase and promotes the degradation of the synaptic vesicle-associated protein, CDCrel-1.	Pubmed	0.8581	1000	16.6	164.2	2	4	UBE2L3,PRKN
	31217465	Environmental microcystin targets the microbiome and increases the risk of intestinal inflammatory pathology via NOX2 in underlying murine model of Nonalcoholic Fatty Liver Disease.	Pubmed	0.8581	1000	16.6	164.2	2	4	NCF1C,NCF1B
	19942291	Src kinase participates in LPS-induced activation of NADPH oxidase.	Pubmed	0.8581	1000	16.6	164.2	2	4	NCF1C,NCF1B
	19124074	Genetic deficiency of NADPH oxidase does not diminish, but rather enhances, LPS-induced acute inflammatory responses in vivo.	Pubmed	0.8581	1000	16.6	164.2	2	4	NCF1C,NCF1B
	24778444	NADPH oxidase modifies patterns of MHC class II-restricted epitopic repertoires through redox control of antigen processing.	Pubmed	0.8581	1000	16.6	164.2	2	4	NCF1C,NCF1B
	21933654	Collagen type II and a thermo-responsive polymer of N-isopropylacrylamide induce arthritis independent of Toll-like receptors: a strong influence by major histocompatibility complex class II and Ncf1 genes.	Pubmed	0.8581	1000	16.6	164.2	2	4	NCF1C,NCF1B
	16864727	Deletion of p47phox attenuates angiotensin II-induced abdominal aortic aneurysm formation in apolipoprotein E-deficient mice.	Pubmed	0.8581	1000	16.6	164.2	2	4	NCF1C,NCF1B
	19684185	Partial carotid ligation is a model of acutely induced disturbed flow, leading to rapid endothelial dysfunction and atherosclerosis.	Pubmed	0.8581	1000	16.6	164.2	2	4	NCF1C,NCF1B
	33139577	Akt3 induces oxidative stress and DNA damage by activating the NADPH oxidase via phosphorylation of p47	Pubmed	0.8581	1000	16.6	164.2	2	4	NCF1C,NCF1B
	26021615	Park7 interacts with p47(phox) to direct NADPH oxidase-dependent ROS production and protect against sepsis.	Pubmed	0.8581	1000	16.6	164.2	2	4	NCF1C,NCF1B
	16135753	Accumulation of the authentic parkin substrate aminoacyl-tRNA synthetase cofactor, p38/JTV-1, leads to catecholaminergic cell death.	Pubmed	0.8581	1000	16.6	164.2	2	4	AIMP2,PRKN
	16357364	Impact of mitochondria and NADPH oxidases on acute and sustained hypoxic pulmonary vasoconstriction.	Pubmed	0.8581	1000	16.6	164.2	2	4	NCF1C,NCF1B
	21215311	Oxidative stress induces protein and DNA radical formation in follicular dendritic cells of the germinal center and modulates its cell death patterns in late sepsis.	Pubmed	0.8581	1000	16.6	164.2	2	4	NCF1C,NCF1B
	15743827	Acute tumor necrosis factor alpha signaling via NADPH oxidase in microvascular endothelial cells: role of p47phox phosphorylation and binding to TRAF4.	Pubmed	0.8581	1000	16.6	164.2	2	4	NCF1C,NCF1B
	23922763	Myeloid-derived suppressor cells modulate immune responses independently of NADPH oxidase in the ovarian tumor microenvironment in mice.	Pubmed	0.8581	1000	16.6	164.2	2	4	NCF1C,NCF1B
	21368743	Relative contributions of mitochondria and NADPH oxidase to deoxycorticosterone acetate-salt hypertension in mice.	Pubmed	0.8581	1000	16.6	164.2	2	4	NCF1C,NCF1B
	24784582	Ubiquitin is phosphorylated by PINK1 to activate parkin.	Pubmed	0.8581	1000	16.6	164.2	2	4	UBE2L3,PRKN
	33547170	Asah2 Represses the p53-Hmox1 Axis to Protect Myeloid-Derived Suppressor Cells from Ferroptosis.	Pubmed	0.8581	1000	16.6	164.2	2	4	ASAH2,ASAH2B
	15501765	Suppression of Plasmodium chabaudi parasitemia is independent of the action of reactive oxygen intermediates and/or nitric oxide.	Pubmed	0.8581	1000	16.6	164.2	2	4	NCF1C,NCF1B
	18206127	Adenosine A2A receptor signaling regulation of cardiac NADPH oxidase activity.	Pubmed	0.8581	1000	16.6	164.2	2	4	NCF1C,NCF1B
	24695850	Siglec-G-CD24 axis controls the severity of graft-versus-host disease in mice.	Pubmed	0.8581	1000	16.6	164.2	2	4	SIGLEC16,SIGLEC11
	16127156	Bb2Bb3 regulation of murine Lyme arthritis is distinct from Ncf1 and independent of the phagocyte nicotinamide adenine dinucleotide phosphate oxidase.	Pubmed	0.8581	1000	16.6	164.2	2	4	NCF1C,NCF1B
	20089136	Identification and characterization of a novel endogenous murine parkin mutation.	Pubmed	0.8581	1000	16.6	164.2	2	4	UBE2L3,PRKN
	29774240	Mannan-induced Nos2 in macrophages enhances IL-17-driven psoriatic arthritis by innate lymphocytes.	Pubmed	0.8581	1000	16.6	164.2	2	4	NCF1C,NCF1B
	15388638	Bone morphogenic protein 4 produced in endothelial cells by oscillatory shear stress induces monocyte adhesion by stimulating reactive oxygen species production from a nox1-based NADPH oxidase.	Pubmed	0.8581	1000	16.6	164.2	2	4	NCF1C,NCF1B
	26911690	Parkin Modulates Endosomal Organization and Function of the Endo-Lysosomal Pathway.	Pubmed	0.8581	1000	16.6	164.2	2	4	UBE2L3,PRKN
	14559152	SEPT5_v2 is a parkin-binding protein.	Pubmed	0.8581	1000	16.6	164.2	2	4	UBE2L3,PRKN
	11937554	Role of NADPH oxidase in the mechanism of lung neutrophil sequestration and microvessel injury induced by Gram-negative sepsis: studies in p47phox-/- and gp91phox-/- mice.	Pubmed	0.8581	1000	16.6	164.2	2	4	NCF1C,NCF1B
	22685019	Hyperinflammation of chronic granulomatous disease is abolished by NOX2 reconstitution in macrophages and dendritic cells.	Pubmed	0.8581	1000	16.6	164.2	2	4	NCF1C,NCF1B
	22787054	NADPH oxidase mediates depressive behavior induced by chronic stress in mice.	Pubmed	0.8581	1000	16.6	164.2	2	4	NCF1C,NCF1B
	24814827	Expression levels of eosinophil granule protein mRNAs in induced sputum reflect airway hyperresponsiveness and airflow limitation.	Pubmed	0.8581	1000	16.6	164.2	2	4	RNASE2,RNASE3
	11733538	Ym1 is a neutrophil granule protein that crystallizes in p47phox-deficient mice.	Pubmed	0.8581	1000	16.6	164.2	2	4	NCF1C,NCF1B
	17352382	Hypoosmotic swelling and ammonia increase oxidative stress by NADPH oxidase in cultured astrocytes and vital brain slices.	Pubmed	0.8581	1000	16.6	164.2	2	4	NCF1C,NCF1B
	17720922	Evolution of mammalian chitinase(-like) members of family 18 glycosyl hydrolases.	Pubmed	0.8581	1000	16.6	164.2	2	4	TVP23C-CDRT4,TVP23B
	23429921	NADPH oxidase inhibition prevents beta cell dysfunction induced by prolonged elevation of oleate in rodents.	Pubmed	0.8581	1000	16.6	164.2	2	4	NCF1C,NCF1B
	17927842	Transcriptional regulation of human eosinophil RNases by an evolutionary- conserved sequence motif in primate genome.	Pubmed	0.8581	1000	16.6	164.2	2	4	RNASE2,RNASE3
	1281771	Characterization of the human gene encoding cytokeratin 17 and its expression pattern.	Pubmed	0.8581	1000	16.6	164.2	2	4	KRT17P2,KRT17P1
	31230984	OLFR734 Mediates Glucose Metabolism as a Receptor of Asprosin.	Pubmed	0.8581	1000	16.6	164.2	2	4	OR4M1,OR4M2
	21068125	Homocysteine enhances cell proliferation in vascular smooth muscle cells: role of p38 MAPK and p47phox.	Pubmed	0.8581	1000	16.6	164.2	2	4	NCF1C,NCF1B
	9480752	Identification of a novel Ran binding protein 2 related gene (RANBP2L1) and detection of a gene cluster on human chromosome 2q11-q12.	Pubmed	0.8581	1000	16.6	164.2	2	4	RGPD5,RANBP2
	31350760	Increased ILC3s associated with higher levels of IL-1? aggravates inflammatory arthritis in mice lacking phagocytic NADPH oxidase.	Pubmed	0.8581	1000	16.6	164.2	2	4	NCF1C,NCF1B
	31422870	Neutrophil Extracellular Traps Initiate Gallstone Formation.	Pubmed	0.8581	1000	16.6	164.2	2	4	NCF1C,NCF1B
	9576836	Specific arrest of cardiogenesis in cultured embryonic stem cells lacking Cripto-1.	Pubmed	0.8581	1000	16.6	164.2	2	4	CFC1,CFC1B
	27427418	Reactive Oxygen Species Regulate Innate But Not Adaptive Inflammation in ZAP70-Mutated SKG Arthritic Mice.	Pubmed	0.8581	1000	16.6	164.2	2	4	NCF1C,NCF1B
	23426181	Diabetes increases mortality after myocardial infarction by oxidizing CaMKII.	Pubmed	0.8581	1000	16.6	164.2	2	4	NCF1C,NCF1B
	21376114	Genetic ablation of phagocytic NADPH oxidase in mice limits TNF?-induced inflammation in the lungs but not other tissues.	Pubmed	0.8581	1000	16.6	164.2	2	4	NCF1C,NCF1B
	22642907	Enhancement of antibody-induced arthritis via Toll-like receptor 2 stimulation is regulated by granulocyte reactive oxygen species.	Pubmed	0.8581	1000	16.6	164.2	2	4	NCF1C,NCF1B
	11729200	Role of neutrophil NADPH oxidase in the mechanism of tumor necrosis factor-alpha -induced NF-kappa B activation and intercellular adhesion molecule-1 expression in endothelial cells.	Pubmed	0.8581	1000	16.6	164.2	2	4	NCF1C,NCF1B
	23530143	NADPH oxidase limits lipopolysaccharide-induced lung inflammation and injury in mice through reduction-oxidation regulation of NF-?B activity.	Pubmed	0.8581	1000	16.6	164.2	2	4	NCF1C,NCF1B
	25252961	Siglecs induce tolerance to cell surface antigens by BIM-dependent deletion of the antigen-reactive B cells.	Pubmed	0.8581	1000	16.6	164.2	2	4	SIGLEC16,SIGLEC11
	30120123	Dysregulated Calcium Homeostasis in Cystic Fibrosis Neutrophils Leads to Deficient Antimicrobial Responses.	Pubmed	0.8581	1000	16.6	164.2	2	4	NCF1C,NCF1B
	28957379	Involvement of Parkin in the ubiquitin proteasome system-mediated degradation of N-type voltage-gated Ca2+ channels.	Pubmed	0.8581	1000	16.6	164.2	2	4	UBE2L3,PRKN
	20305638	Identification of two evolutionarily conserved genes regulating processing of engulfed apoptotic cells.	Pubmed	0.8581	1000	16.6	164.2	2	4	CCZ1,CCZ1B
	21641399	Role of p47phox in antigen-presenting cell-mediated regulation of humoral immunity in mice.	Pubmed	0.8581	1000	16.6	164.2	2	4	NCF1C,NCF1B
	25287330	p47phox and reactive oxygen species production modulate expression of microRNA-451 in macrophages.	Pubmed	0.8581	1000	16.6	164.2	2	4	NCF1C,NCF1B
	15791003	Aggregated alpha-synuclein activates microglia: a process leading to disease progression in Parkinson's disease.	Pubmed	0.8581	1000	16.6	164.2	2	4	NCF1C,NCF1B
	11696587	Regulation of murine intestinal inflammation by reactive metabolites of oxygen and nitrogen: divergent roles of superoxide and nitric oxide.	Pubmed	0.8581	1000	16.6	164.2	2	4	NCF1C,NCF1B
	20053794	PKC-alpha mediates flow-stimulated superoxide production in thick ascending limbs.	Pubmed	0.8581	1000	16.6	164.2	2	4	NCF1C,NCF1B
	30446597	Synergistic recruitment of UbcH7~Ub and phosphorylated Ubl domain triggers parkin activation.	Pubmed	0.8581	1000	16.6	164.2	2	4	UBE2L3,PRKN
	24600033	Siglec-G deficiency leads to more severe collagen-induced arthritis and earlier onset of lupus-like symptoms in MRL/lpr mice.	Pubmed	0.8581	1000	16.6	164.2	2	4	SIGLEC16,SIGLEC11
	29195137	The NADPH organizers NoxO1 and p47phox are both mediators of diabetes-induced vascular dysfunction in mice.	Pubmed	0.8581	1000	16.6	164.2	2	4	NCF1C,NCF1B
	28414322	Parkin-phosphoubiquitin complex reveals cryptic ubiquitin-binding site required for RBR ligase activity.	Pubmed	0.8581	1000	16.6	164.2	2	4	UBE2L3,PRKN
	26254304	Disruption of the autoinhibited state primes the E3 ligase parkin for activation and catalysis.	Pubmed	0.8581	1000	16.6	164.2	2	4	UBE2L3,PRKN
	11992720	Role of the EGF-CFC gene cripto in cell differentiation and embryo development.	Pubmed	0.8581	1000	16.6	164.2	2	4	CFC1,CFC1B
	11591392	Localization of neutral ceramidase in caveolin-enriched light membranes of murine endothelial cells.	Pubmed	0.8581	1000	16.6	164.2	2	4	ASAH2,ASAH2B
	14734763	p47phox deficiency impairs NF-kappa B activation and host defense in Pseudomonas pneumonia.	Pubmed	0.8581	1000	16.6	164.2	2	4	NCF1C,NCF1B
	22145029	NADPH oxidase-2 derived ROS dictates murine DC cytokine-mediated cell fate decisions during CD4 T helper-cell commitment.	Pubmed	0.8581	1000	16.6	164.2	2	4	NCF1C,NCF1B
	15557642	Distinct roles of reactive nitrogen and oxygen species to control infection with the facultative intracellular bacterium Francisella tularensis.	Pubmed	0.8581	1000	16.6	164.2	2	4	NCF1C,NCF1B
	31604916	Cytosolic ROS production by NADPH oxidase 2 regulates muscle glucose uptake during exercise.	Pubmed	0.8581	1000	16.6	164.2	2	4	NCF1C,NCF1B
	16399995	LIM kinase 2 is widely expressed in all tissues.	Pubmed	0.8703	1000	16.66	164.8	3	16	GOLGA8N,GOLGA8K,GOLGA8O
	11784862	Molecular motor KIF1C is not essential for mouse survival and motor-dependent retrograde Golgi apparatus-to-endoplasmic reticulum transport.	Pubmed	0.8703	1000	16.66	164.8	3	16	GOLGA8N,GOLGA8K,GOLGA8O
	21640725	p125/Sec23-interacting protein (Sec23ip) is required for spermiogenesis.	Pubmed	0.8703	1000	16.66	164.8	3	16	GOLGA8N,GOLGA8K,GOLGA8O
	16336229	Molecular characterization of mitocalcin, a novel mitochondrial Ca2+-binding protein with EF-hand and coiled-coil domains.	Pubmed	0.8703	1000	16.66	164.8	3	16	GOLGA8N,GOLGA8K,GOLGA8O
	18166528	SLC24A5 encodes a trans-Golgi network protein with potassium-dependent sodium-calcium exchange activity that regulates human epidermal melanogenesis.	Pubmed	0.8703	1000	16.66	164.8	3	16	GOLGA8N,GOLGA8K,GOLGA8O
	25208654	Yip1B isoform is localized at ER-Golgi intermediate and cis-Golgi compartments and is not required for maintenance of the Golgi structure in skeletal muscle.	Pubmed	0.8703	1000	16.66	164.8	3	16	GOLGA8N,GOLGA8K,GOLGA8O
	14718562	Phospholipase D2 localizes to the plasma membrane and regulates angiotensin II receptor endocytosis.	Pubmed	1.047	1000	19.85	196.3	3	17	GOLGA8N,GOLGA8K,GOLGA8O
	33305682	Guanine Nucleotide-Binding Protein-Like 1 (GNL1) binds RNA G-quadruplex structures in genes associated with Parkinson's disease.	Pubmed	1.047	1000	19.85	196.3	3	17	MRPL45,VPS35,PRKN
	28717168	Dynamics and function of CXCR4 in formation of the granule cell layer during hippocampal development.	Pubmed	1.047	1000	19.85	196.3	3	17	GOLGA8N,GOLGA8K,GOLGA8O
	27655914	The Protein Tyrosine Phosphatase MEG2 Regulates the Transport and Signal Transduction of Tropomyosin Receptor Kinase A.	Pubmed	1.047	1000	19.85	196.3	3	17	GOLGA8N,GOLGA8K,GOLGA8O
	14728599	Vesicle budding from endoplasmic reticulum is involved in calsequestrin routing to sarcoplasmic reticulum of skeletal muscles.	Pubmed	1.047	1000	19.85	196.3	3	17	GOLGA8N,GOLGA8K,GOLGA8O
	20004763	A truncating mutation of TRAPPC9 is associated with autosomal-recessive intellectual disability and postnatal microcephaly.	Pubmed	1.047	1000	19.85	196.3	3	17	GOLGA8N,GOLGA8K,GOLGA8O
	15815621	Generation and annotation of the DNA sequences of human chromosomes 2 and 4.	Pubmed	1.097	1000	20.75	205.2	14	442	UGT2B7,RGPD5,POTEF,USP17L5,MRPL33,LIMS3,USP17L9P,POTEJ,CYP4F62P,SULT1C3,CFC1,RANBP2,PLAC9P1,POTEI
	15164054	The DNA sequence and comparative analysis of human chromosome 10.	Pubmed	1.112	1000	20.99	207.6	12	345	ANXA8L1,FAM25G,ASAH2,ANTXRL,FAM25BP,CTNNA3,AKR1C3,PRKCQ,PTPN20,TIMM23B,NSUN6,AGAP14P
	11013070	Fine-scale comparative mapping of the human 7q11.23 region and the orthologous region on mouse chromosome 5G: the low-copy repeats that flank the Williams-Beuren syndrome deletion arose at breakpoint sites of an evolutionary inversion(s).	Pubmed	1.118	1000	21.07	208.4	4	38	NCF1C,NCF1B,POM121,BAZ1B
	10591208	The DNA sequence of human chromosome 22.	Pubmed	1.132	1000	21.3	210.6	11	299	SYN3,BCRP3,TMEM191B,AP1B1P1,RIMBP3,RFPL2,BCRP2,HIC2,GGT1,GGT5,P2RX6
	9847074	Toward a complete human genome sequence.	Pubmed	1.202	1000	21.42	211.8	23	937	RAB6C,PMS2P7,GOLGA2P10,CASTOR2,TCAF2P1,NSUN5,CCZ1,SPDYE8,NCF1C,NCF1B,LOC100101148,TCAF1,UBE2Q2P2,POM121,FKBP9P1,LOC727751,SBDSP1,SPDYE10,BAZ1B,GTF2IP4,SPDYE9,GOLGA6L10,GOLGA6L9
	21147753	Notch inhibition by the ligand DELTA-LIKE 3 defines the mechanism of abnormal vertebral segmentation in spondylocostal dysostosis.	Pubmed	1.246	1000	21.42	211.8	3	18	GOLGA8N,GOLGA8K,GOLGA8O
	24227724	N-cadherin sustains motility and polarity of future cortical interneurons during tangential migration.	Pubmed	1.246	1000	21.42	211.8	3	18	GOLGA8N,GOLGA8K,GOLGA8O
	22718342	Flightless, secreted through a late endosome/lysosome pathway, binds LPS and dampens cytokine secretion.	Pubmed	1.246	1000	21.42	211.8	3	18	GOLGA8N,GOLGA8K,GOLGA8O
	20943658	Expression, localization, and biochemical characterization of nicotinamide mononucleotide adenylyltransferase 2.	Pubmed	1.246	1000	21.42	211.8	3	18	GOLGA8N,GOLGA8K,GOLGA8O
	34255394	Stage-dependent function of Wnt5a during male external genitalia development.	Pubmed	1.246	1000	21.42	211.8	3	18	GOLGA8N,GOLGA8K,GOLGA8O
	15800058	p115 Interacts with the GLUT4 vesicle protein, IRAP, and plays a critical role in insulin-stimulated GLUT4 translocation.	Pubmed	1.246	1000	21.42	211.8	3	18	GOLGA8N,GOLGA8K,GOLGA8O
	20230794	Altered GLUT4 trafficking in adipocytes in the absence of the GTPase Arfrp1.	Pubmed	1.246	1000	21.42	211.8	3	18	GOLGA8N,GOLGA8K,GOLGA8O
	24367100	Protein kinase LKB1 regulates polarized dendrite formation of adult hippocampal newborn neurons.	Pubmed	1.246	1000	21.42	211.8	3	18	GOLGA8N,GOLGA8K,GOLGA8O
	17097888	Gene dosage in the developing and adult brain in a mouse model of 22q11 deletion syndrome.	Pubmed	1.246	1000	21.42	211.8	3	18	PRODH,GGT1,GGT3P
	18063838	Lung lining fluid glutathione attenuates IL-13-induced asthma.	Pubmed	1.419	1000	21.42	211.8	2	5	GGT1,GGT3P
	28986419	Type III interferon is a critical regulator of innate antifungal immunity.	Pubmed	1.419	1000	21.42	211.8	2	5	NCF1C,NCF1B
	29381135	NADPH oxidase mediates microtubule alterations and diaphragm dysfunction in dystrophic mice.	Pubmed	1.419	1000	21.42	211.8	2	5	NCF1C,NCF1B
	10940879	Gamma-glutamyltranspeptidase knockout mice as a model for understanding the consequences of diminished glutathione on T cell-dependent immune responses.	Pubmed	1.419	1000	21.42	211.8	2	5	GGT1,GGT3P
	22081025	Oxidation of CaMKII determines the cardiotoxic effects of aldosterone.	Pubmed	1.419	1000	21.42	211.8	2	5	NCF1C,NCF1B
	25661082	Sphingosylphosphorylcholine potentiates vasoreactivity and voltage-gated Ca2+ entry via NOX1 and reactive oxygen species.	Pubmed	1.419	1000	21.42	211.8	2	5	NCF1C,NCF1B
	26169578	Sulfation of afimoxifene, endoxifen, raloxifene, and fulvestrant by the human cytosolic sulfotransferases (SULTs): A systematic analysis.	Pubmed	1.419	1000	21.42	211.8	2	5	SULT1A2,SULT1A1
	11095909	Cataract development in gamma-glutamyl transpeptidase-deficient mice.	Pubmed	1.419	1000	21.42	211.8	2	5	GGT1,GGT3P
	20541007	Hypoxia and reoxygenation-induced oxidant production increase in microvascular endothelial cells depends on connexin40.	Pubmed	1.419	1000	21.42	211.8	2	5	NCF1C,NCF1B
	7641802	Expression of gamma-glutamyl transpeptidase in midgestation mouse yolk sac and mouse visceral yolk sac carcinoma cells.	Pubmed	1.419	1000	21.42	211.8	2	5	GGT1,GGT3P
	11431533	Ubiquitination of a new form of alpha-synuclein by parkin from human brain: implications for Parkinson's disease.	Pubmed	1.419	1000	21.42	211.8	2	5	UBE2L3,PRKN
	15028295	CCL3L1 and CCL4L1 chemokine genes are located in a segmental duplication at chromosome 17q12.	Pubmed	1.419	1000	21.42	211.8	2	5	CCL4L2,CCL3L3
	23615310	Phenotypic characterization of Ggt1(dwg/dwg) mice,a mouse model for hereditary ?-glutamyltransferase deficiency.	Pubmed	1.419	1000	21.42	211.8	2	5	GGT1,GGT3P
	24563256	Influenza infection suppresses NADPH oxidase-dependent phagocytic bacterial clearance and enhances susceptibility to secondary methicillin-resistant Staphylococcus aureus infection.	Pubmed	1.419	1000	21.42	211.8	2	5	NCF1C,NCF1B
	34529741	Histone demethylase LSD1 promotes RIG-I poly-ubiquitination and anti-viral gene expression.	Pubmed	1.419	1000	21.42	211.8	2	5	DDX58,RNF135
	22653270	Deletion of p47phox attenuates the progression of diabetic nephropathy and reduces the severity of diabetes in the Akita mouse.	Pubmed	1.419	1000	21.42	211.8	2	5	NCF1C,NCF1B
	19014520	Variation in genes encoding eosinophil granule proteins in atopic dermatitis patients from Germany.	Pubmed	1.419	1000	21.42	211.8	2	5	RNASE2,RNASE3
	17030572	The SecA2 secretion factor of Mycobacterium tuberculosis promotes growth in macrophages and inhibits the host immune response.	Pubmed	1.419	1000	21.42	211.8	2	5	NCF1C,NCF1B
	9627710	The mouse skin carcinogenesis model.	Pubmed	1.419	1000	21.42	211.8	2	5	GGT1,GGT3P
	12453183	Gamma-glutamyl transpeptidase and its role in melanogenesis: redox reactions and regulation of tyrosinase.	Pubmed	1.419	1000	21.42	211.8	2	5	GGT1,GGT3P
	17872466	Ets-1 is a critical transcriptional regulator of reactive oxygen species and p47(phox) gene expression in response to angiotensin II.	Pubmed	1.419	1000	21.42	211.8	2	5	NCF1C,NCF1B
	24281189	Activation of NAD(P)H oxidase by tryptophan-derived 3-hydroxykynurenine accelerates endothelial apoptosis and dysfunction in vivo.	Pubmed	1.419	1000	21.42	211.8	2	5	NCF1C,NCF1B
	20019328	Angiotensin II induces a region-specific hyperplasia of the ascending aorta through regulation of inhibitor of differentiation 3.	Pubmed	1.419	1000	21.42	211.8	2	5	NCF1C,NCF1B
	26980188	Karyomegalic interstitial nephritis and DNA damage-induced polyploidy in Fan1 nuclease-defective knock-in mice.	Pubmed	1.419	1000	21.42	211.8	2	5	SLX1B,SLX1A
	11003618	gamma-glutamyltranspeptidase-deficient knockout mice as a model to study the relationship between glutathione status, mitochondrial function, and cellular function.	Pubmed	1.419	1000	21.42	211.8	2	5	GGT1,GGT3P
	30076526	AT2R Activation Prevents Microglia Pro-inflammatory Activation in a NOX-Dependent Manner: Inhibition of PKC Activation and p47	Pubmed	1.419	1000	21.42	211.8	2	5	NCF1C,NCF1B
	16714332	De novo ICAM-1 synthesis in the mouse lung: model of assessment of protein expression in lungs.	Pubmed	1.419	1000	21.42	211.8	2	5	NCF1C,NCF1B
	2904146	Cloning and nucleotide sequence of human gamma-glutamyl transpeptidase.	Pubmed	1.419	1000	21.42	211.8	2	5	GGTLC3,GGT1
	22491245	Reactive oxygen species produced by the NADPH oxidase 2 complex in monocytes protect mice from bacterial infections.	Pubmed	1.419	1000	21.42	211.8	2	5	NCF1C,NCF1B
	18398435	Williams-Beuren syndrome TRIM50 encodes an E3 ubiquitin ligase.	Pubmed	1.419	1000	21.42	211.8	2	5	TRIM74,TRIM50
	22252868	Hypoxia-mediated impairment of the mitochondrial respiratory chain inhibits the bactericidal activity of macrophages.	Pubmed	1.419	1000	21.42	211.8	2	5	NCF1C,NCF1B
	18566430	Sequential binding of cytosolic Phox complex to phagosomes through regulated adaptor proteins: evaluation using the novel monomeric Kusabira-Green System and live imaging of phagocytosis.	Pubmed	1.419	1000	21.42	211.8	2	5	NCF1C,NCF1B
	18638544	Hypoxia activates NADPH oxidase to increase [ROS]i and [Ca2+]i through the mitochondrial ROS-PKCepsilon signaling axis in pulmonary artery smooth muscle cells.	Pubmed	1.419	1000	21.42	211.8	2	5	NCF1C,NCF1B
	24272050	Riboflavin (vitamin B2 ) deficiency impairs NADPH oxidase 2 (Nox2) priming and defense against Listeria monocytogenes.	Pubmed	1.419	1000	21.42	211.8	2	5	NCF1C,NCF1B
	11867678	Thioglycollate peritonitis in mice lacking C5, 5-lipoxygenase, or p47(phox): complement, leukotrienes, and reactive oxidants in acute inflammation.	Pubmed	1.419	1000	21.42	211.8	2	5	NCF1C,NCF1B
	15318931	UDP-glucuronosyltransferase and sulfotransferase polymorphisms, sex hormone concentrations, and tumor receptor status in breast cancer patients.	Pubmed	1.419	1000	21.42	211.8	2	5	UGT2B7,SULT1A1
	9053319	A differential display strategy identifies Cryptic, a novel EGF-related gene expressed in the axial and lateral mesoderm during mouse gastrulation.	Pubmed	1.419	1000	21.42	211.8	2	5	CFC1,CFC1B
	18403597	Genetic ablation of NADPH oxidase enhances susceptibility to cigarette smoke-induced lung inflammation and emphysema in mice.	Pubmed	1.419	1000	21.42	211.8	2	5	NCF1C,NCF1B
	10392451	Gamma-glutamyl transpeptidase gene organization and expression: a comparative analysis in rat, mouse, pig and human species.	Pubmed	1.419	1000	21.42	211.8	2	5	GGT1,GGT3P
	24906799	The ubiquitin-conjugating enzymes UBE2N, UBE2L3 and UBE2D2/3 are essential for Parkin-dependent mitophagy.	Pubmed	1.419	1000	21.42	211.8	2	5	UBE2L3,PRKN
	22219181	Novel role for non-muscle myosin light chain kinase (MLCK) in hyperoxia-induced recruitment of cytoskeletal proteins, NADPH oxidase activation, and reactive oxygen species generation in lung endothelium.	Pubmed	1.419	1000	21.42	211.8	2	5	NCF1C,NCF1B
	24213612	Nox-derived ROS are acutely activated in pressure overload pulmonary hypertension: indications for a seminal role for mitochondrial Nox4.	Pubmed	1.419	1000	21.42	211.8	2	5	NCF1C,NCF1B
	2891746	Immunocytochemical localization of gamma-glutamyltranspeptidase during fetal development of mouse kidney.	Pubmed	1.419	1000	21.42	211.8	2	5	GGT1,GGT3P
	19850887	Hyperoxia-induced lung injury in gamma-glutamyl transferase deficiency is associated with alterations in nitrosative and nitrative stress.	Pubmed	1.419	1000	21.42	211.8	2	5	GGT1,GGT3P
	22241983	Inflammatory monocytes and neutrophils are licensed to kill during memory responses in vivo.	Pubmed	1.419	1000	21.42	211.8	2	5	NCF1C,NCF1B
	22914323	PP2A-dependent control of transcriptionally active FOXO3a in CD8(+) central memory lymphocyte survival requires p47(phox).	Pubmed	1.419	1000	21.42	211.8	2	5	NCF1C,NCF1B
	28751937	Myricitrin Modulates NADPH Oxidase-Dependent ROS Production to Inhibit Endotoxin-Mediated Inflammation by Blocking the JAK/STAT1 and NOX2/p47	Pubmed	1.419	1000	21.42	211.8	2	5	NCF1C,NCF1B
	7906515	Expression of multiple gamma-glutamyltransferase genes in man.	Pubmed	1.419	1000	21.42	211.8	2	5	GGTLC3,GGT1
	30323343	Fibrin-targeting immunotherapy protects against neuroinflammation and neurodegeneration.	Pubmed	1.419	1000	21.42	211.8	2	5	NCF1C,NCF1B
	20493939	NADPH oxidase-derived superoxide impairs calcium transients and contraction in aged murine ventricular myocytes.	Pubmed	1.419	1000	21.42	211.8	2	5	NCF1C,NCF1B
	18779779	Critical role of the NADPH oxidase subunit p47phox on vascular TLR expression and neointimal lesion formation in high-fat diet-induced obesity.	Pubmed	1.419	1000	21.42	211.8	2	5	NCF1C,NCF1B
	12810527	Reversible skeletal abnormalities in gamma-glutamyl transpeptidase-deficient mice.	Pubmed	1.419	1000	21.42	211.8	2	5	GGT1,GGT3P
	27425374	Deletion of Wiskott-Aldrich syndrome protein triggers Rac2 activity and increased cross-presentation by dendritic cells.	Pubmed	1.419	1000	21.42	211.8	2	5	NCF1C,NCF1B
	8755578	Growth retardation and cysteine deficiency in gamma-glutamyl transpeptidase-deficient mice.	Pubmed	1.419	1000	21.42	211.8	2	5	GGT1,GGT3P
	16769910	Bone morphogenic protein-4 induces hypertension in mice: role of noggin, vascular NADPH oxidases, and impaired vasorelaxation.	Pubmed	1.419	1000	21.42	211.8	2	5	NCF1C,NCF1B
	11089562	Reproductive defects in gamma-glutamyl transpeptidase-deficient mice.	Pubmed	1.419	1000	21.42	211.8	2	5	GGT1,GGT3P
	16931806	The role of the NADPH oxidase complex, p38 MAPK, and Akt in regulating human monocyte/macrophage survival.	Pubmed	1.419	1000	21.42	211.8	2	5	NCF1C,NCF1B
	18436804	Urokinase plasminogen activator upregulates paraoxonase 2 expression in macrophages via an NADPH oxidase-dependent mechanism.	Pubmed	1.419	1000	21.42	211.8	2	5	NCF1C,NCF1B
	28660214	Liver-Specific Overexpression of Gamma-Glutamyltransferase Ameliorates Insulin Sensitivity of Male C57BL/6 Mice.	Pubmed	1.419	1000	21.42	211.8	2	5	GGT1,GGT3P
	18455987	A dynamic pathway for calcium-independent activation of CaMKII by methionine oxidation.	Pubmed	1.419	1000	21.42	211.8	2	5	NCF1C,NCF1B
	12468440	Bleomycin-induced pulmonary fibrosis is attenuated in gamma-glutamyl transpeptidase-deficient mice.	Pubmed	1.419	1000	21.42	211.8	2	5	GGT1,GGT3P
	26977590	N-acetyl-cysteine prevents age-related hearing loss and the progressive loss of inner hair cells in ?-glutamyl transferase 1 deficient mice.	Pubmed	1.419	1000	21.42	211.8	2	5	GGT1,GGT3P
	22549734	The p47phox- and NADPH oxidase organiser 1 (NOXO1)-dependent activation of NADPH oxidase 1 (NOX1) mediates endothelial nitric oxide synthase (eNOS) uncoupling and endothelial dysfunction in a streptozotocin-induced murine model of diabetes.	Pubmed	1.419	1000	21.42	211.8	2	5	NCF1C,NCF1B
	12225953	Gamma-glutamyl transferase deficiency results in lung oxidant stress in normoxia.	Pubmed	1.419	1000	21.42	211.8	2	5	GGT1,GGT3P
	7775425	Identification of a sixth promoter that directs the transcription of gamma-glutamyl transpeptidase type III RNA in mouse.	Pubmed	1.419	1000	21.42	211.8	2	5	GGT1,GGT3P
	22271254	Neddylation positively regulates the ubiquitin E3 ligase activity of parkin.	Pubmed	1.419	1000	21.42	211.8	2	5	UBE2L3,PRKN
	19264983	CD24 and Siglec-10 selectively repress tissue damage-induced immune responses.	Pubmed	1.419	1000	21.42	211.8	2	5	SIGLEC16,SIGLEC11
	19249346	NADPH oxidase contributes to conversion of cardiac myocytes to a proinflammatory phenotype in sepsis.	Pubmed	1.419	1000	21.42	211.8	2	5	NCF1C,NCF1B
	27519415	A Glutaredoxin-BolA Complex Serves as an Iron-Sulfur Cluster Chaperone for the Cytosolic Cluster Assembly Machinery.	Pubmed	1.419	1000	21.42	211.8	2	5	BOLA2B,BOLA2
	29499563	Astrocytic CCAAT/Enhancer-binding protein delta contributes to reactive oxygen species formation in neuroinflammation.	Pubmed	1.419	1000	21.42	211.8	2	5	NCF1C,NCF1B
	8566783	Cloning of cDNA and genomic structure of the mouse gamma-glutamyl transpeptidase-encoding gene.	Pubmed	1.419	1000	21.42	211.8	2	5	GGT1,GGT3P
	27526712	Nox2-derived oxidative stress results in inefficacy of antibiotics against post-influenza S. aureus pneumonia.	Pubmed	1.419	1000	21.42	211.8	2	5	NCF1C,NCF1B
	30591459	Therapeutic Effect of GGsTop, Selective Gamma-glutamyl Transpeptidase Inhibitor, on a Mouse Model of 5-Fluorouracil-induced Oral Mucositis.	Pubmed	1.419	1000	21.42	211.8	2	5	GGT1,GGT3P
	19484123	REUL is a novel E3 ubiquitin ligase and stimulator of retinoic-acid-inducible gene-I.	Pubmed	1.419	1000	21.42	211.8	2	5	DDX58,RNF135
	20049703	Induced chromosome deletions cause hypersociability and other features of Williams-Beuren syndrome in mice.	Pubmed	1.419	1000	21.42	211.8	2	5	TRIM74,TRIM50
	22746225	BOLA1 is an aerobic protein that prevents mitochondrial morphology changes induced by glutathione depletion.	Pubmed	1.419	1000	21.42	211.8	2	5	BOLA2B,BOLA2
	23322906	A genome-wide siRNA screen reveals positive and negative regulators of the NOD2 and NF-?B signaling pathways.	Pubmed	1.419	1000	21.42	211.8	2	5	NCF1C,NCF1B
	31442911	Serum response factor (SRF) promotes ROS generation and hepatic stellate cell activation by epigenetically stimulating NCF1/2 transcription.	Pubmed	1.419	1000	21.42	211.8	2	5	NCF1C,NCF1B
	17875676	Role of the T cell in the genesis of angiotensin II induced hypertension and vascular dysfunction.	Pubmed	1.419	1000	21.42	211.8	2	5	NCF1C,NCF1B
	15501800	Both inducible nitric oxide synthase and NADPH oxidase contribute to the control of virulent phase I Coxiella burnetii infections.	Pubmed	1.419	1000	21.42	211.8	2	5	NCF1C,NCF1B
	9139708	Mice with genetic gamma-glutamyl transpeptidase deficiency exhibit glutathionuria, severe growth failure, reduced life spans, and infertility.	Pubmed	1.419	1000	21.42	211.8	2	5	GGT1,GGT3P
	20622017	Analysis of site-specific glycosylation of renal and hepatic ?-glutamyl transpeptidase from normal human tissue.	Pubmed	1.419	1000	21.42	211.8	2	5	GGT1,GGT3P
	19017631	Riplet/RNF135, a RING finger protein, ubiquitinates RIG-I to promote interferon-beta induction during the early phase of viral infection.	Pubmed	1.419	1000	21.42	211.8	2	5	DDX58,RNF135
	21240276	Disruption of mouse Slx4, a regulator of structure-specific nucleases, phenocopies Fanconi anemia.	Pubmed	1.419	1000	21.42	211.8	2	5	SLX1B,SLX1A
	9546365	Accelerated methylmercury elimination in gamma-glutamyl transpeptidase-deficient mice.	Pubmed	1.419	1000	21.42	211.8	2	5	GGT1,GGT3P
	25224222	Self-regulated left-right asymmetric expression of Pitx2c in the developing mouse limb.	Pubmed	1.419	1000	21.42	211.8	2	5	CFC1,CFC1B
	18358245	Paraoxonase 1 (PON1) attenuates diabetes development in mice through its antioxidative properties.	Pubmed	1.419	1000	21.42	211.8	2	5	NCF1C,NCF1B
	22012330	Differential activation of RAGE by HMGB1 modulates neutrophil-associated NADPH oxidase activity and bacterial killing.	Pubmed	1.419	1000	21.42	211.8	2	5	NCF1C,NCF1B
	24733019	Unaltered striatal dopamine release levels in young Parkin knockout, Pink1 knockout, DJ-1 knockout and LRRK2 R1441G transgenic mice.	Pubmed	1.419	1000	21.42	211.8	2	5	KHDRBS2,PRKN
	22973021	Activation of neuronal NMDA receptors induces superoxide-mediated oxidative stress in neighboring neurons and astrocytes.	Pubmed	1.419	1000	21.42	211.8	2	5	NCF1C,NCF1B
	11795900	In vivo reversal of glutathione deficiency and susceptibility to in vivo dexamethasone-induced apoptosis by N-acetylcysteine and L-2-oxothiazolidine-4-carboxylic acid, but not ascorbic acid, in thymocytes from gamma-glutamyltranspeptidase-deficient knockout mice.	Pubmed	1.419	1000	21.42	211.8	2	5	GGT1,GGT3P
	7485380	gamma-Glutamyl transpeptidase. What does the organization and expression of a multipromoter gene tell us about its functions?	Pubmed	1.419	1000	21.42	211.8	2	5	GGT1,GGT3P
	22343416	P2X7 receptor-NADPH oxidase axis mediates protein radical formation and Kupffer cell activation in carbon tetrachloride-mediated steatohepatitis in obese mice.	Pubmed	1.419	1000	21.42	211.8	2	5	NCF1C,NCF1B
	16207877	Expression and modulation of an NADPH oxidase in mammalian astrocytes.	Pubmed	1.419	1000	21.42	211.8	2	5	NCF1C,NCF1B
	26747235	Lack of p47(phox) in Akita Diabetic Mice Is Associated with Interstitial Pneumonia, Fibrosis, and Oral Inflammation.	Pubmed	1.419	1000	21.42	211.8	2	5	NCF1C,NCF1B
	17982097	FcepsilonRI- and Fcgamma receptor-mediated production of reactive oxygen species by mast cells is lipoxygenase- and cyclooxygenase-dependent and NADPH oxidase-independent.	Pubmed	1.419	1000	21.42	211.8	2	5	NCF1C,NCF1B
	20386726	Bicaudal D2, dynein, and kinesin-1 associate with nuclear pore complexes and regulate centrosome and nuclear positioning during mitotic entry.	Pubmed	1.419	1000	21.42	211.8	2	5	RAB6A,RANBP2
	21715554	Superoxide production by macrophages and T cells is critical for the induction of autoreactivity and type 1 diabetes.	Pubmed	1.419	1000	21.42	211.8	2	5	NCF1C,NCF1B
	25358739	Vascular injury in diabetic db/db mice is ameliorated by atorvastatin: role of Rac1/2-sensitive Nox-dependent pathways.	Pubmed	1.419	1000	21.42	211.8	2	5	NCF1C,NCF1B
	31006531	Ubiquitin-Dependent and -Independent Roles of E3 Ligase RIPLET in Innate Immunity.	Pubmed	1.419	1000	21.42	211.8	2	5	DDX58,RNF135
	12355456	Gene copy number regulates the production of the human chemokine CCL3-L1.	Pubmed	1.419	1000	21.42	211.8	2	5	CCL4L2,CCL3L3
	19696743	A non-redundant role for MKP5 in limiting ROS production and preventing LPS-induced vascular injury.	Pubmed	1.419	1000	21.42	211.8	2	5	NCF1C,NCF1B
	24312579	Reinvestigation of aminoacyl-tRNA synthetase core complex by affinity purification-mass spectrometry reveals TARSL2 as a potential member of the complex.	Pubmed	1.419	1000	21.42	211.8	2	5	TARS3,AIMP2
	10751614	Accumulation of DNA damage in the organs of mice deficient in gamma-glutamyltranspeptidase.	Pubmed	1.419	1000	21.42	211.8	2	5	GGT1,GGT3P
	25987743	Siglec-G Deficiency Leads to Autoimmunity in Aging C57BL/6 Mice.	Pubmed	1.419	1000	21.42	211.8	2	5	SIGLEC16,SIGLEC11
	17392790	TRIM25 RING-finger E3 ubiquitin ligase is essential for RIG-I-mediated antiviral activity.	Pubmed	1.419	1000	21.42	211.8	2	5	DDX58,RNF135
	10714686	Impaired immunity and enhanced resistance to endotoxin in the absence of neutrophil elastase and cathepsin G.	Pubmed	1.419	1000	21.42	211.8	2	5	NCF1C,NCF1B
	30397035	Critical Role of Macrophage Fc?R Signaling and Reactive Oxygen Species in Alloantibody-Mediated Hepatocyte Rejection.	Pubmed	1.419	1000	21.42	211.8	2	5	NCF1C,NCF1B
	10698974	STAG3, a novel gene encoding a protein involved in meiotic chromosome pairing and location of STAG3-related genes flanking the Williams-Beuren syndrome deletion.	Pubmed	1.419	1000	21.42	211.8	2	5	STAG3L3,STAG3L4
	32737150	B Lymphocyte-Derived CCL7 Augments Neutrophil and Monocyte Recruitment, Exacerbating Acute Kidney Injury.	Pubmed	1.419	1000	21.42	211.8	2	5	SIGLEC16,SIGLEC11
	9621063	Interaction of the human immunodeficiency virus type 1 Vpr protein with the nuclear pore complex.	Pubmed	1.419	1000	21.42	211.8	2	5	POM121,IPO5
	9490028	Functional modules and expression of mouse p40(phox) and p67(phox), SH3-domain-containing proteins involved in the phagocyte NADPH oxidase complex.	Pubmed	1.419	1000	21.42	211.8	2	5	NCF1C,NCF1B
	7523374	Type VI RNA is the major gamma-glutamyl transpeptidase RNA in the mouse small intestine.	Pubmed	1.419	1000	21.42	211.8	2	5	GGT1,GGT3P
	11850190	The ret finger protein-like 4 gene, Rfpl4, encodes a putative E3 ubiquitin-protein ligase expressed in adult germ cells.	Pubmed	1.419	1000	21.42	211.8	2	5	RFPL2,RFPL1
	22081612	Ataxin-3 deubiquitination is coupled to Parkin ubiquitination via E2 ubiquitin-conjugating enzyme.	Pubmed	1.419	1000	21.42	211.8	2	5	UBE2L3,PRKN
	24076219	Cooperative control of holliday junction resolution and DNA repair by the SLX1 and MUS81-EME1 nucleases.	Pubmed	1.419	1000	21.42	211.8	2	5	SLX1B,SLX1A
	24698228	Cardio-reno-hepatic interactions in acute heart failure: the role of ?-glutamyl transferase.	Pubmed	1.419	1000	21.42	211.8	2	5	GGT1,GGT3P
	27548433	The lectin Siglec-G inhibits dendritic cell cross-presentation by impairing MHC class I-peptide complex formation.	Pubmed	1.419	1000	21.42	211.8	2	5	SIGLEC16,SIGLEC11
	18192840	Renovascular hypertension by two-kidney one-clip enhances endothelial progenitor cell mobilization in a p47phox-dependent manner.	Pubmed	1.419	1000	21.42	211.8	2	5	NCF1C,NCF1B
	28939422	Suppressed ubiquitination of Nrf2 by p47	Pubmed	1.419	1000	21.42	211.8	2	5	NCF1C,NCF1B
	25009551	The ATXN2-SH2B3 locus is associated with peripheral arterial disease: an electronic medical record-based genome-wide association study.	Pubmed	1.419	1000	21.42	211.8	2	5	IGLL1,FAM230I
	26947073	Sialic Acid-Binding Immunoglobulin-like Lectin G Promotes Atherosclerosis and Liver Inflammation by Suppressing the Protective Functions of B-1 Cells.	Pubmed	1.419	1000	21.42	211.8	2	5	SIGLEC16,SIGLEC11
	19103777	Role of NADPH phagocyte oxidase in host defense against acute respiratory Acinetobacter baumannii infection in mice.	Pubmed	1.419	1000	21.42	211.8	2	5	NCF1C,NCF1B
	25132819	Inhibiting lung lining fluid glutathione metabolism with GGsTop as a novel treatment for asthma.	Pubmed	1.419	1000	21.42	211.8	2	5	GGT1,GGT3P
	28945249	Mechanism and regulation of the Lys6-selective deubiquitinase USP30.	Pubmed	1.419	1000	21.42	211.8	2	5	UBE2L3,PRKN
	19760322	Characterization of the dwg mutations: dwg and dwg(Bayer) are new mutant alleles of the Ggt1 gene.	Pubmed	1.419	1000	21.42	211.8	2	5	GGT1,GGT3P
	11714743	p47phox is required for atherosclerotic lesion progression in ApoE(-/-) mice.	Pubmed	1.419	1000	21.42	211.8	2	5	NCF1C,NCF1B
	16096643	14-3-3eta is a novel regulator of parkin ubiquitin ligase.	Pubmed	1.419	1000	21.42	211.8	2	5	UBE2L3,PRKN
	10474818	gamma-Glutamyl transferase (GGT) deficiency in the GGTenu1 mouse results from a single point mutation that leads to a stop codon in the first coding exon of GGT mRNA.	Pubmed	1.419	1000	21.42	211.8	2	5	GGT1,GGT3P
	26116755	Binding to serine 65-phosphorylated ubiquitin primes Parkin for optimal PINK1-dependent phosphorylation and activation.	Pubmed	1.419	1000	21.42	211.8	2	5	UBE2L3,PRKN
	34085299	The atypical small GTPase GEM/Kir is a negative regulator of the NADPH oxidase and NETs production through macroautophagy.	Pubmed	1.419	1000	21.42	211.8	2	5	NCF1C,NCF1B
	23296708	NADPH oxidase and Nrf2 regulate gastric aspiration-induced inflammation and acute lung injury.	Pubmed	1.419	1000	21.42	211.8	2	5	NCF1C,NCF1B
	21623346	A hypomorphic IgH-chain allele affects development of B-cell subsets and favours receptor editing.	Pubmed	1.419	1000	21.42	211.8	2	5	SIGLEC16,SIGLEC11
	22460559	Divergent effects of p47(phox) phosphorylation at S303-4 or S379 on tumor necrosis factor-? signaling via TRAF4 and MAPK in endothelial cells.	Pubmed	1.419	1000	21.42	211.8	2	5	NCF1C,NCF1B
	19299716	Ncf1 provides a reactive oxygen species-independent negative feedback regulation of TLR9-induced IL-12p70 in murine dendritic cells.	Pubmed	1.419	1000	21.42	211.8	2	5	NCF1C,NCF1B
	23444373	SDF2L1 interacts with the ER-associated degradation machinery and retards the degradation of mutant proinsulin in pancreatic ?-cells.	Pubmed	1.466	1000	21.83	215.9	3	19	GOLGA8N,GOLGA8K,GOLGA8O
	12646573	Presenilin 1 and presenilin 2 have differential effects on the stability and maturation of nicastrin in Mammalian brain.	Pubmed	1.466	1000	21.83	215.9	3	19	GOLGA8N,GOLGA8K,GOLGA8O
	28067227	CDK4/6-dependent activation of DUB3 regulates cancer metastasis through SNAIL1.	Pubmed	1.466	1000	21.83	215.9	3	19	USP17L6P,USP17L9P,USP17L15
	17664336	Divergent functions and distinct localization of the Notch ligands DLL1 and DLL3 in vivo.	Pubmed	1.466	1000	21.83	215.9	3	19	GOLGA8N,GOLGA8K,GOLGA8O
	17724343	Spatial regulation of Raf kinase signaling by RKTG.	Pubmed	1.466	1000	21.83	215.9	3	19	GOLGA8N,GOLGA8K,GOLGA8O
	15452145	Presenilin 1 mediates the turnover of telencephalin in hippocampal neurons via an autophagic degradative pathway.	Pubmed	1.466	1000	21.83	215.9	3	19	GOLGA8N,GOLGA8K,GOLGA8O
	14622145	Scrg1, a novel protein of the CNS is targeted to the large dense-core vesicles in neuronal cells.	Pubmed	1.466	1000	21.83	215.9	3	19	GOLGA8N,GOLGA8K,GOLGA8O
	34128978	The molecular complex of ciliary and golgin protein is crucial for skull development.	Pubmed	1.466	1000	21.83	215.9	3	19	GOLGA8N,GOLGA8K,GOLGA8O
	22841714	Pilt is a coiled-coil domain-containing protein that localizes at the trans-Golgi complex and regulates its structure.	Pubmed	1.466	1000	21.83	215.9	3	19	GOLGA8N,GOLGA8K,GOLGA8O
	17003038	Regulation of amino acid transporter ATA2 by ubiquitin ligase Nedd4-2.	Pubmed	1.466	1000	21.83	215.9	3	19	GOLGA8N,GOLGA8K,GOLGA8O
	23918928	Furin is the primary in vivo convertase of angiopoietin-like 3 and endothelial lipase in hepatocytes.	Pubmed	1.709	1000	25.22	249.4	3	20	GOLGA8N,GOLGA8K,GOLGA8O
	21300694	The COPI vesicle complex binds and moves with survival motor neuron within axons.	Pubmed	1.709	1000	25.22	249.4	3	20	GOLGA8N,GOLGA8K,GOLGA8O
	20368623	Intraflagellar transport molecules in ciliary and nonciliary cells of the retina.	Pubmed	1.709	1000	25.22	249.4	3	20	GOLGA8N,GOLGA8K,GOLGA8O
	31949138	Maximizing the ovarian reserve in mice by evading LINE-1 genotoxicity.	Pubmed	1.709	1000	25.22	249.4	3	20	GOLGA8N,GOLGA8K,GOLGA8O
	17359961	Development of the post-natal growth plate requires intraflagellar transport proteins.	Pubmed	1.709	1000	25.22	249.4	3	20	GOLGA8N,GOLGA8K,GOLGA8O
	30236446	TMED2/emp24 is required in both the chorion and the allantois for placental labyrinth layer development.	Pubmed	1.709	1000	25.22	249.4	3	20	GOLGA8N,GOLGA8K,GOLGA8O
	29437892	Overlapping Role of SCYL1 and SCYL3 in Maintaining Motor Neuron Viability.	Pubmed	1.709	1000	25.22	249.4	3	20	GOLGA8N,GOLGA8K,GOLGA8O
	27118846	Canonical and noncanonical intraflagellar transport regulates craniofacial skeletal development.	Pubmed	1.976	1000	28.93	286.1	3	21	GOLGA8N,GOLGA8K,GOLGA8O
	21645620	DJ-1 associates with synaptic membranes.	Pubmed	1.976	1000	28.93	286.1	3	21	GOLGA8N,GOLGA8K,GOLGA8O
	19061864	Rap2 function requires palmitoylation and recycling endosome localization.	Pubmed	1.976	1000	28.93	286.1	3	21	GOLGA8N,GOLGA8K,GOLGA8O
	22216013	Ror2 enhances polarity and directional migration of primordial germ cells.	Pubmed	1.976	1000	28.93	286.1	3	21	GOLGA8N,GOLGA8K,GOLGA8O
	20003423	Mechanism of primitive duct formation in the pancreas and submandibular glands: a role for SDF-1.	Pubmed	1.976	1000	28.93	286.1	3	21	GOLGA8N,GOLGA8K,GOLGA8O
	23386608	Dynamics of the rhomboid-like protein RHBDD2 expression in mouse retina and involvement of its human ortholog in retinitis pigmentosa.	Pubmed	1.976	1000	28.93	286.1	3	21	GOLGA8N,GOLGA8K,GOLGA8O
	19881509	PCBP2 mediates degradation of the adaptor MAVS via the HECT ubiquitin ligase AIP4.	Pubmed	2.111	1000	28.99	286.6	2	6	DDX58,RNF135
	18806761	p47phox-deficient immune microenvironment signals dysregulate naive T-cell apoptosis.	Pubmed	2.111	1000	28.99	286.6	2	6	NCF1C,NCF1B
	21532592	UBCH7 reactivity profile reveals parkin and HHARI to be RING/HECT hybrids.	Pubmed	2.111	1000	28.99	286.6	2	6	UBE2L3,PRKN
	18070887	Phosphatidylinositol 3-kinase-dependent membrane recruitment of Rac-1 and p47phox is critical for alpha-platelet-derived growth factor receptor-induced production of reactive oxygen species.	Pubmed	2.111	1000	28.99	286.6	2	6	NCF1C,NCF1B
	26036345	Augmented EGF receptor tyrosine kinase activity impairs vascular function by NADPH oxidase-dependent mechanism in type 2 diabetic mouse.	Pubmed	2.111	1000	28.99	286.6	2	6	NCF1C,NCF1B
	21474822	Src phosphorylation of endothelial cell surface intercellular adhesion molecule-1 mediates neutrophil adhesion and contributes to the mechanism of lung inflammation.	Pubmed	2.111	1000	28.99	286.6	2	6	NCF1C,NCF1B
	19439231	Insulin-induced NADPH oxidase activation promotes proliferation and matrix metalloproteinase activation in monocytes/macrophages.	Pubmed	2.111	1000	28.99	286.6	2	6	NCF1C,NCF1B
	9730612	Expressed copies of the MN7 (D15F37) gene family map close to the common deletion breakpoints in the Prader-Willi/Angelman syndromes.	Pubmed	2.111	1000	28.99	286.6	2	6	HERC2P3,HERC2P2
	24012755	SLX4 assembles a telomere maintenance toolkit by bridging multiple endonucleases with telomeres.	Pubmed	2.111	1000	28.99	286.6	2	6	SLX1B,SLX1A
	25809117	Molecular mechanisms of NET formation and degradation revealed by intravital imaging in the liver vasculature.	Pubmed	2.111	1000	28.99	286.6	2	6	NCF1C,NCF1B
	14634009	Gamma-glutamyltranspeptidase stimulates receptor activator of nuclear factor-kappaB ligand expression independent of its enzymatic activity and serves as a pathological bone-resorbing factor.	Pubmed	2.111	1000	28.99	286.6	2	6	GGT1,GGT3P
	15282315	Depletion of the 110-kilodalton isoform of poly(ADP-ribose) glycohydrolase increases sensitivity to genotoxic and endotoxic stress in mice.	Pubmed	2.111	1000	28.99	286.6	2	6	PARG,TIMM23B
	20195241	Oxidative stress mediates nephropathy in type Ia glycogen storage disease.	Pubmed	2.111	1000	28.99	286.6	2	6	NCF1C,NCF1B
	17363454	Overexpression of gamma-glutamyltransferase in transgenic mice accelerates bone resorption and causes osteoporosis.	Pubmed	2.111	1000	28.99	286.6	2	6	GGT1,GGT3P
	27605430	Structural insights into Parkin substrate lysine targeting from minimal Miro substrates.	Pubmed	2.111	1000	28.99	286.6	2	6	UBE2L3,PRKN
	14559209	Molecular analysis of human Siglec-8 orthologs relevant to mouse eosinophils: identification of mouse orthologs of Siglec-5 (mSiglec-F) and Siglec-10 (mSiglec-G).	Pubmed	2.111	1000	28.99	286.6	2	6	SIGLEC16,SIGLEC11
	8101000	Six mRNAs with different 5' ends are encoded by a single gamma-glutamyltransferase gene in mouse.	Pubmed	2.111	1000	28.99	286.6	2	6	GGT1,GGT3P
	10574770	A role of the cryptic gene in the correct establishment of the left-right axis.	Pubmed	2.111	1000	28.99	286.6	2	6	CFC1,CFC1B
	8663190	Four distinct membrane-bound dipeptidase RNAs are differentially expressed and show discordant regulation with gamma-glutamyl transpeptidase.	Pubmed	2.111	1000	28.99	286.6	2	6	GGT1,GGT3P
	27912196	NOX isoforms in the development of abdominal aortic aneurysm.	Pubmed	2.111	1000	28.99	286.6	2	6	NCF1C,NCF1B
	8104871	Mapping of human gamma-glutamyl transpeptidase genes on chromosome 22 and other human autosomes.	Pubmed	2.111	1000	28.99	286.6	2	6	GGT1,GGT3P
	29234000	Peritoneal tissue-resident macrophages are metabolically poised to engage microbes using tissue-niche fuels.	Pubmed	2.111	1000	28.99	286.6	2	6	NCF1C,NCF1B
	11986327	Cloning and characterization of human Siglec-11. A recently evolved signaling molecule that can interact with SHP-1 and SHP-2 and is expressed by tissue macrophages, including brain microglia.	Pubmed	2.111	1000	28.99	286.6	2	6	SIGLEC16,SIGLEC11
	17171436	Two novel transcripts encoding two Ankyrin repeat containing proteins have preponderant expression during the mouse spermatogenesis.	Pubmed	2.111	1000	28.99	286.6	2	6	POTEB2,POTEB
	30504831	Loss of peroxiredoxin-2 exacerbates eccentric contraction-induced force loss in dystrophin-deficient muscle.	Pubmed	2.111	1000	28.99	286.6	2	6	NCF1C,NCF1B
	12052855	Dual roles of Cripto as a ligand and coreceptor in the nodal signaling pathway.	Pubmed	2.111	1000	28.99	286.6	2	6	CFC1,CFC1B
	23884469	CaMKII is essential for the proasthmatic effects of oxidation.	Pubmed	2.111	1000	28.99	286.6	2	6	NCF1C,NCF1B
	25326709	Effect of atorvastatin on the expression of gamma-glutamyl transferase in aortic atherosclerotic plaques of apolipoprotein E-knockout mice.	Pubmed	2.111	1000	28.99	286.6	2	6	GGT1,GGT3P
	21956105	Cooperation of p40(phox) with p47(phox) for Nox2-based NADPH oxidase activation during Fc? receptor (Fc?R)-mediated phagocytosis: mechanism for acquisition of p40(phox) phosphatidylinositol 3-phosphate (PI(3)P) binding.	Pubmed	2.111	1000	28.99	286.6	2	6	NCF1C,NCF1B
	27397585	Phagocyte respiratory burst activates macrophage erythropoietin signalling to promote acute inflammation resolution.	Pubmed	2.111	1000	28.99	286.6	2	6	NCF1C,NCF1B
	17991893	GRP78 and Cripto form a complex at the cell surface and collaborate to inhibit transforming growth factor beta signaling and enhance cell growth.	Pubmed	2.111	1000	28.99	286.6	2	6	CFC1,CFC1B
	18436796	Heparin-binding epidermal growth factor-like growth factor signaling in flow-induced arterial remodeling.	Pubmed	2.111	1000	28.99	286.6	2	6	NCF1C,NCF1B
	20558727	NADPH oxidases regulate CD44 and hyaluronic acid expression in thrombin-treated vascular smooth muscle cells and in atherosclerosis.	Pubmed	2.111	1000	28.99	286.6	2	6	NCF1C,NCF1B
	15123520	Aldosterone administration to mice stimulates macrophage NADPH oxidase and increases atherosclerosis development: a possible role for angiotensin-converting enzyme and the receptors for angiotensin II and aldosterone.	Pubmed	2.111	1000	28.99	286.6	2	6	NCF1C,NCF1B
	28515366	Experimental lupus is aggravated in mouse strains with impaired induction of neutrophil extracellular traps.	Pubmed	2.111	1000	28.99	286.6	2	6	NCF1C,NCF1B
	20301696	22q11.2 Deletion Syndrome	Pubmed	2.111	1000	28.99	286.6	2	6	DGCR6,SPECC1L
	24051369	Role of NADPH oxidase isoforms NOX1, NOX2 and NOX4 in myocardial ischemia/reperfusion injury.	Pubmed	2.111	1000	28.99	286.6	2	6	NCF1C,NCF1B
	22163282	Role of NADPH oxidase versus neutrophil proteases in antimicrobial host defense.	Pubmed	2.111	1000	28.99	286.6	2	6	NCF1C,NCF1B
	25501551	Micro-RNA 21 inhibition of SMAD7 enhances fibrogenesis via leptin-mediated NADPH oxidase in experimental and human nonalcoholic steatohepatitis.	Pubmed	2.111	1000	28.99	286.6	2	6	NCF1C,NCF1B
	29604308	TRIM50 regulates Beclin 1 proautophagic activity.	Pubmed	2.111	1000	28.99	286.6	2	6	TRIM74,TRIM50
	20300512	NADPH oxidase limits innate immune responses in the lungs in mice.	Pubmed	2.111	1000	28.99	286.6	2	6	NCF1C,NCF1B
	21677136	Cutting edge: reactive oxygen species inhibitors block priming, but not activation, of the NLRP3 inflammasome.	Pubmed	2.111	1000	28.99	286.6	2	6	NCF1C,NCF1B
	18195069	Eosinophil-derived neurotoxin acts as an alarmin to activate the TLR2-MyD88 signal pathway in dendritic cells and enhances Th2 immune responses.	Pubmed	2.111	1000	28.99	286.6	2	6	RNASE2,RNASE3
	26297224	Impaired compensation to femoral artery ligation in diet-induced obese mice is primarily mediated via suppression of collateral growth by Nox2 and p47phox.	Pubmed	2.111	1000	28.99	286.6	2	6	NCF1C,NCF1B
	22579284	RTEL1 dismantles T loops and counteracts telomeric G4-DNA to maintain telomere integrity.	Pubmed	2.111	1000	28.99	286.6	2	6	SLX1B,SLX1A
	19833721	Dynamin 2 and c-Abl are novel regulators of hyperoxia-mediated NADPH oxidase activation and reactive oxygen species production in caveolin-enriched microdomains of the endothelium.	Pubmed	2.111	1000	28.99	286.6	2	6	NCF1C,NCF1B
	10089886	Combinatorial receptor codes for odors.	Pubmed	2.111	1000	28.99	286.6	2	6	OR11G2,OR11H4
	22242126	Ablation of Mrds1/Ofcc1 induces hyper-?-glutamyl transpeptidasemia without abnormal head development and schizophrenia-relevant behaviors in mice.	Pubmed	2.111	1000	28.99	286.6	2	6	GGT1,GGT3P
	24186876	NADPH oxidase mediates synergistic effects of IL-17 and TNF-? on CXCL1 expression by epithelial cells after lung ischemia-reperfusion.	Pubmed	2.111	1000	28.99	286.6	2	6	NCF1C,NCF1B
	27197155	Oncogenic Mutation of AIMP2/p38 Inhibits Its Tumor-Suppressive Interaction with Smurf2.	Pubmed	2.111	1000	28.99	286.6	2	6	AIMP2,PRKN
	10706615	The olfactory receptor gene repertoire in primates and mouse: evidence for reduction of the functional fraction in primates.	Pubmed	2.585	1000	34.71	343.2	3	23	OR1A1,OR4Q3,OR1A2
	25636444	Common and distinctive localization patterns of Crumbs polarity complex proteins in the mammalian eye.	Pubmed	2.585	1000	34.71	343.2	3	23	GOLGA8N,GOLGA8K,GOLGA8O
	11597144	Physical mapping of the mouse tilted locus identifies an association between human deafness loci DFNA6/14 and vestibular system development.	Pubmed	2.585	1000	34.71	343.2	3	23	TMEM128,DRD5,OTOP1
	18662990	ADP-ribosylation factor-like GTPase ARFRP1 is required for trans-Golgi to plasma membrane trafficking of E-cadherin.	Pubmed	2.585	1000	34.71	343.2	3	23	GOLGA8N,GOLGA8K,GOLGA8O
	21111240	Reelin and stk25 have opposing roles in neuronal polarization and dendritic Golgi deployment.	Pubmed	2.585	1000	34.71	343.2	3	23	GOLGA8N,GOLGA8K,GOLGA8O
	18001291	Mapping of Cbln1-like immunoreactivity in adult and developing mouse brain and its localization to the endolysosomal compartment of neurons.	Pubmed	2.585	1000	34.71	343.2	3	23	GOLGA8N,GOLGA8K,GOLGA8O
	18547789	Pofut1 is required for the proper localization of the Notch receptor during mouse development.	Pubmed	2.585	1000	34.71	343.2	3	23	GOLGA8N,GOLGA8K,GOLGA8O
	26060116	Ectopic clustering of Cajal-Retzius and subplate cells is an initial pathological feature in Pomgnt2-knockout mice, a model of dystroglycanopathy.	Pubmed	2.928	1000	34.71	343.2	3	24	GOLGA8N,GOLGA8K,GOLGA8O
	18434600	Essential role of cyclin-G-associated kinase (Auxilin-2) in developing and mature mice.	Pubmed	2.928	1000	34.71	343.2	3	24	GOLGA8N,GOLGA8K,GOLGA8O
	21187406	Sorting receptor Rer1 controls surface expression of muscle acetylcholine receptors by ER retention of unassembled alpha-subunits.	Pubmed	2.928	1000	34.71	343.2	3	24	GOLGA8N,GOLGA8K,GOLGA8O
	24161848	Regulation of cell polarity in the cartilage growth plate and perichondrium of metacarpal elements by HOXD13 and WNT5A.	Pubmed	2.928	1000	34.71	343.2	3	24	GOLGA8N,GOLGA8K,GOLGA8O
	20223754	The PCP genes Celsr1 and Vangl2 are required for normal lung branching morphogenesis.	Pubmed	2.928	1000	34.71	343.2	3	24	GOLGA8N,GOLGA8K,GOLGA8O
	34433040	Dual role for CXCL12 signaling in semilunar valve development.	Pubmed	2.928	1000	34.71	343.2	3	24	GOLGA8N,GOLGA8K,GOLGA8O
	29587143	A Golgi Lipid Signaling Pathway Controls Apical Golgi Distribution and Cell Polarity during Neurogenesis.	Pubmed	2.928	1000	34.71	343.2	3	24	GOLGA8N,GOLGA8K,GOLGA8O
	22364862	Stalk cell phenotype depends on integration of Notch and Smad1/5 signaling cascades.	Pubmed	2.928	1000	34.71	343.2	3	24	GOLGA8N,GOLGA8K,GOLGA8O
	32506037	Nox4 - RyR1 - Nox2: Regulators of micro-domain signaling in skeletal muscle.	Pubmed	2.932	1000	34.71	343.2	2	7	NCF1C,NCF1B
	27573815	Pyroptosis triggers pore-induced intracellular traps (PITs) that capture bacteria and lead to their clearance by efferocytosis.	Pubmed	2.932	1000	34.71	343.2	2	7	NCF1C,NCF1B
	23431040	Regulation of chemokines, CCL3 and CCL4, by interferon ? and nitric oxide synthase 2 in mouse macrophages and during Salmonella enterica serovar typhimurium infection.	Pubmed	2.932	1000	34.71	343.2	2	7	CCL4L2,CCL3L3
	27775020	?-Glutamyltranspeptidase is an endogenous activator of Toll-like receptor 4-mediated osteoclastogenesis.	Pubmed	2.932	1000	34.71	343.2	2	7	GGT1,GGT3P
	9494100	Cloning and characterization of mouse intestinal MUC3 mucin: 3' sequence contains epidermal-growth-factor-like domains.	Pubmed	2.932	1000	34.71	343.2	2	7	NCF1C,NCF1B
	15276201	Five POTE paralogs and their splice variants are expressed in human prostate and encode proteins of different lengths.	Pubmed	2.932	1000	34.71	343.2	2	7	POTEB3,POTEB
	12377948	Role of the autocrine chemokines MIP-1alpha and MIP-1beta in the metastatic behavior of murine T cell lymphoma.	Pubmed	2.932	1000	34.71	343.2	2	7	CCL4L2,CCL3L3
	11544318	ATP-mediated killing of intracellular mycobacteria by macrophages is a P2X(7)-dependent process inducing bacterial death by phagosome-lysosome fusion.	Pubmed	2.932	1000	34.71	343.2	2	7	NCF1C,NCF1B
	23950712	A distinct role of Riplet-mediated K63-Linked polyubiquitination of the RIG-I repressor domain in human antiviral innate immune responses.	Pubmed	2.932	1000	34.71	343.2	2	7	DDX58,RNF135
	23648818	Bifidobacterium infantis suppression of Peyer's patch MIP-1? and MIP-1? secretion during Salmonella infection correlates with increased local CD4+CD25+ T cell numbers.	Pubmed	2.932	1000	34.71	343.2	2	7	CCL4L2,CCL3L3
	18182394	Regulation of TGFbeta1-mediated collagen formation by LOX-1: studies based on forced overexpression of TGFbeta1 in wild-type and lox-1 knock-out mouse cardiac fibroblasts.	Pubmed	2.932	1000	34.71	343.2	2	7	NCF1C,NCF1B
	24136195	Cytosolic sulfotransferase 1A3 is induced by dopamine and protects neuronal cells from dopamine toxicity: role of D1 receptor-N-methyl-D-aspartate receptor coupling.	Pubmed	2.932	1000	34.71	343.2	2	7	SULT1A3,SULT1A4
	1972563	Two inflammatory mediator cytokine genes are closely linked and variably amplified on chromosome 17q.	Pubmed	2.932	1000	34.71	343.2	2	7	CCL4L2,CCL3L3
	25136095	Mannan induces ROS-regulated, IL-17A-dependent psoriasis arthritis-like disease in mice.	Pubmed	2.932	1000	34.71	343.2	2	7	NCF1C,NCF1B
	29434374	Reactive oxygen species regulate axonal regeneration through the release of exosomal NADPH oxidase 2 complexes into injured axons.	Pubmed	2.932	1000	34.71	343.2	2	7	NCF1C,NCF1B
	20454568	Regulation of NOXO1 activity through reversible interactions with p22 and NOXA1.	Pubmed	2.932	1000	34.71	343.2	2	7	NCF1C,NCF1B
	15850784	Identification of non-mitochondrial NADPH oxidase and the spatio-temporal organization of its components in mouse spermatozoa.	Pubmed	2.932	1000	34.71	343.2	2	7	NCF1C,NCF1B
	29742431	ATF4 Regulates CD4	Pubmed	2.932	1000	34.71	343.2	2	7	NCF1C,NCF1B
	32284594	Transcriptional profiling and therapeutic targeting of oxidative stress in neuroinflammation.	Pubmed	2.932	1000	34.71	343.2	2	7	GGT1,GGT3P
	11907569	Killing activity of neutrophils is mediated through activation of proteases by K+ flux.	Pubmed	2.932	1000	34.71	343.2	2	7	NCF1C,NCF1B
	12960284	Prostaglandin E2 inhibits production of the inflammatory chemokines CCL3 and CCL4 in dendritic cells.	Pubmed	2.932	1000	34.71	343.2	2	7	CCL4L2,CCL3L3
	12401480	Macrophage inflammatory protein-1.	Pubmed	2.932	1000	34.71	343.2	2	7	CCL4L2,CCL3L3
	19595721	Coordination of structure-specific nucleases by human SLX4/BTBD12 is required for DNA repair.	Pubmed	2.932	1000	34.71	343.2	2	7	SLX1B,SLX1A
	28100677	Paired Siglec receptors generate opposite inflammatory responses to a human-specific pathogen.	Pubmed	2.932	1000	34.71	343.2	2	7	SIGLEC16,SIGLEC11
	21694720	Autoregulation of Parkin activity through its ubiquitin-like domain.	Pubmed	2.932	1000	34.71	343.2	2	7	UBE2L3,PRKN
	10521397	Conserved requirement for EGF-CFC genes in vertebrate left-right axis formation.	Pubmed	2.932	1000	34.71	343.2	2	7	CFC1,CFC1B
	9434938	The genetic origin of mouse annexin VIII.	Pubmed	2.932	1000	34.71	343.2	2	7	ANXA8L1,ANXA8
	8119734	Cloning and functional expression of the mouse homologue of p47phox.	Pubmed	2.932	1000	34.71	343.2	2	7	NCF1C,NCF1B
	1968405	Defective epidermal growth factor gene expression in mice with polycystic kidney disease.	Pubmed	2.932	1000	34.71	343.2	2	7	GGT1,GGT3P
	23603832	Neutrophil-mediated oxidation of erythrocyte peroxiredoxin 2 as a potential marker of oxidative stress in inflammation.	Pubmed	2.932	1000	34.71	343.2	2	7	NCF1C,NCF1B
	33968922	Mutations in RNA Methyltransferase Gene	Pubmed	2.932	1000	34.71	343.2	2	7	NSUN5P2,NSUN5
	19906859	Reversal of left-right asymmetry induced by aberrant Nodal signaling in the node of mouse embryos.	Pubmed	2.932	1000	34.71	343.2	2	7	CFC1,CFC1B
	30062795	Pulmonary metastatic colonisation and granulomas in NOX2-deficient mice.	Pubmed	2.932	1000	34.71	343.2	2	7	NCF1C,NCF1B
	23200858	Tracing conidial fate and measuring host cell antifungal activity using a reporter of microbial viability in the lung.	Pubmed	2.932	1000	34.71	343.2	2	7	NCF1C,NCF1B
	12393512	MIP-1alpha and MIP-1beta differentially mediate mucosal and systemic adaptive immunity.	Pubmed	2.932	1000	34.71	343.2	2	7	CCL4L2,CCL3L3
	21376232	PARIS (ZNF746) repression of PGC-1? contributes to neurodegeneration in Parkinson's disease.	Pubmed	2.932	1000	34.71	343.2	2	7	UBE2L3,PRKN
	23840825	Mechanisms of Siglec-F-induced eosinophil apoptosis: a role for caspases but not for SHP-1, Src kinases, NADPH oxidase or reactive oxygen.	Pubmed	2.932	1000	34.71	343.2	2	7	NCF1C,NCF1B
	26582200	Lifeguard Inhibits Fas Ligand-mediated Endoplasmic Reticulum-Calcium Release Mandatory for Apoptosis in Type II Apoptotic Cells.	Pubmed	3.298	1000	34.71	343.2	3	25	GOLGA8N,GOLGA8K,GOLGA8O
	23028652	Nubp1 is required for lung branching morphogenesis and distal progenitor cell survival in mice.	Pubmed	3.298	1000	34.71	343.2	3	25	GOLGA8N,GOLGA8K,GOLGA8O
	15078902	Cargo-selective endosomal sorting for retrieval to the Golgi requires retromer.	Pubmed	3.298	1000	34.71	343.2	3	25	GOLGA8N,GOLGA8K,GOLGA8O
	26143639	Brain development is impaired in c-fos -/- mice.	Pubmed	3.298	1000	34.71	343.2	3	25	GOLGA8N,GOLGA8K,GOLGA8O
	27436040	Gestational stress induces the unfolded protein response, resulting in heart defects.	Pubmed	3.298	1000	34.71	343.2	3	25	GOLGA8N,GOLGA8K,GOLGA8O
	1370859	Expression of members of the putative olfactory receptor gene family in mammalian germ cells.	Pubmed	3.298	1000	34.71	343.2	3	25	OR2L2,OR2L1P,OR1D2
	27471260	Apoptosis regulates endothelial cell number and capillary vessel diameter but not vessel regression during retinal angiogenesis.	Pubmed	3.298	1000	34.71	343.2	3	25	GOLGA8N,GOLGA8K,GOLGA8O
	24161523	Forward genetics defines Xylt1 as a key, conserved regulator of early chondrocyte maturation and skeletal length.	Pubmed	3.298	1000	34.71	343.2	3	25	GOLGA8N,GOLGA8K,GOLGA8O
	28768200	CFP1 Regulates Histone H3K4 Trimethylation and Developmental Potential in Mouse Oocytes.	Pubmed	3.298	1000	34.71	343.2	3	25	GOLGA8N,GOLGA8K,GOLGA8O
	24927181	Genome-wide association study identifies three novel susceptibility loci for severe Acne vulgaris.	Pubmed	3.313	1000	34.71	343.2	7	159	BCRP3,POM121L9P,POM121L8P,GGT1,GGT5,SPECC1L,POM121L10P
	22806269	CDK5RAP2 expression during murine and human brain development correlates with pathology in primary autosomal recessive microcephaly.	Pubmed	3.695	1000	34.71	343.2	3	26	GOLGA8N,GOLGA8K,GOLGA8O
	24384391	Dual function of Yap in the regulation of lens progenitor cells and cellular polarity.	Pubmed	3.695	1000	34.71	343.2	3	26	GOLGA8N,GOLGA8K,GOLGA8O
	19474315	UBXD4, a UBX-containing protein, regulates the cell surface number and stability of alpha3-containing nicotinic acetylcholine receptors.	Pubmed	3.695	1000	34.71	343.2	3	26	GOLGA8N,GOLGA8K,GOLGA8O
	31655624	Dynein activating adaptor BICD2 controls radial migration of upper-layer cortical neurons in vivo.	Pubmed	3.695	1000	34.71	343.2	3	26	GOLGA8N,GOLGA8K,GOLGA8O
	31138815	Endophilin-A2 dependent VEGFR2 endocytosis promotes sprouting angiogenesis.	Pubmed	3.695	1000	34.71	343.2	3	26	GOLGA8N,GOLGA8K,GOLGA8O
	32673396	PTEN dephosphorylates Abi1 to promote epithelial morphogenesis.	Pubmed	3.695	1000	34.71	343.2	3	26	GOLGA8N,GOLGA8K,GOLGA8O
	18624355	Engagement of Toll-like receptor 2 in mouse macrophages infected with Mycobacterium avium induces non-oxidative and TNF-independent anti-mycobacterial activity.	Pubmed	3.878	1000	34.71	343.2	2	8	NCF1C,NCF1B
	19596236	Human SLX4 is a Holliday junction resolvase subunit that binds multiple DNA repair/recombination endonucleases.	Pubmed	3.878	1000	34.71	343.2	2	8	SLX1B,SLX1A
	20064468	SH3 domains from a subset of BAR proteins define a Ubl-binding domain and implicate parkin in synaptic ubiquitination.	Pubmed	3.878	1000	34.71	343.2	2	8	UBE2L3,PRKN
	11069716	Differential expression and regulation of macrophage inflammatory protein (MIP)-1alpha and MIP-2 genes by alveolar and peritoneal macrophages in LPS-hyporesponsive C3H/HeJ mice.	Pubmed	3.878	1000	34.71	343.2	2	8	CCL4L2,CCL3L3
	23112334	Regulatory T cells increase the avidity of primary CD8+ T cell responses and promote memory.	Pubmed	3.878	1000	34.71	343.2	2	8	CCL4L2,CCL3L3
	24370436	27-Hydroxycholesterol and 7alpha-hydroxycholesterol trigger a sequence of events leading to migration of CCR5-expressing Th1 lymphocytes.	Pubmed	3.878	1000	34.71	343.2	2	8	CCL4L2,CCL3L3
	11829490	A 3-Mb map of a large Segmental duplication overlapping the alpha7-nicotinic acetylcholine receptor gene (CHRNA7) at human 15q13-q14.	Pubmed	3.878	1000	34.71	343.2	2	8	CHRNA7,ULK4P1
	9510207	Regulation of hyaluronan-induced chemokine gene expression by IL-10 and IFN-gamma in mouse macrophages.	Pubmed	3.878	1000	34.71	343.2	2	8	CCL4L2,CCL3L3
	32518374	WSTF acetylation by MOF promotes WSTF activities and oncogenic functions.	Pubmed	3.878	1000	34.71	343.2	2	8	KANSL1,BAZ1B
	12628165	Parkin is a component of an SCF-like ubiquitin ligase complex and protects postmitotic neurons from kainate excitotoxicity.	Pubmed	3.878	1000	34.71	343.2	2	8	UBE2L3,PRKN
	22666322	Nicotinic receptor Alpha7 expression during tooth morphogenesis reveals functional pleiotropy.	Pubmed	3.878	1000	34.71	343.2	2	8	CHRNA7,EDAR
	17553932	Parkin-mediated monoubiquitination of the PDZ protein PICK1 regulates the activity of acid-sensing ion channels.	Pubmed	3.878	1000	34.71	343.2	2	8	UBE2L3,PRKN
	21419113	Left-right asymmetry in the level of active Nodal protein produced in the node is translated into left-right asymmetry in the lateral plate of mouse embryos.	Pubmed	3.878	1000	34.71	343.2	2	8	CFC1,CFC1B
	12651873	Non-syndromic vestibular disorder with otoconial agenesis in tilted/mergulhador mice caused by mutations in otopetrin 1.	Pubmed	3.878	1000	34.71	343.2	2	8	DRD5,OTOP1
	25658046	Mouse and human CRKL is dosage sensitive for cardiac outflow tract formation.	Pubmed	3.878	1000	34.71	343.2	2	8	SLC7A4,P2RX6
	15736223	Two nodal-responsive enhancers control left-right asymmetric expression of Nodal.	Pubmed	3.878	1000	34.71	343.2	2	8	CFC1,CFC1B
	20142249	Associations between polymorphisms in glucuronidation and sulfation enzymes and mammographic breast density in premenopausal women in the United States.	Pubmed	3.878	1000	34.71	343.2	2	8	UGT2B7,SULT1A1
	26367131	The NLRP3 Inflammasome and IL-1? Accelerate Immunologically Mediated Pathology in Experimental Viral Fulminant Hepatitis.	Pubmed	3.878	1000	34.71	343.2	2	8	NCF1C,NCF1B
	27879269	Basophils Promote Tumor Rejection via Chemotaxis and Infiltration of CD8+ T Cells.	Pubmed	3.878	1000	34.71	343.2	2	8	CCL4L2,CCL3L3
	15498767	A novel signaling pathway mediates the inhibition of CCL3/4 expression by prostaglandin E2.	Pubmed	3.878	1000	34.71	343.2	2	8	CCL4L2,CCL3L3
	12525704	RFPL4 interacts with oocyte proteins of the ubiquitin-proteasome degradation pathway.	Pubmed	3.878	1000	34.71	343.2	2	8	RFPL2,RFPL1
	22075471	Expression of NADPH oxidase by trophoblast cells: potential implications for the postimplanting mouse embryo.	Pubmed	3.878	1000	34.71	343.2	2	8	NCF1C,NCF1B
	20300190	Characterization of the Melanoma miRNAome by Deep Sequencing.	Pubmed	3.888	1000	34.71	343.2	6	123	MIR3179-3,MIR3118-2,MIR3118-4,MIR3118-3,MIR3180-3,MIR3179-4
	15146197	Transcriptome characterization elucidates signaling networks that control human ES cell growth and differentiation.	Pubmed	3.902	1000	34.71	343.2	26	1215	TUBA3FP,NPIPB12,HERC2P3,ANXA2R,GOLGA2P10,NSUN5,GTF2IRD2B,CCZ1,EIF3C,PRODH,GLUD1P2,UBE2Q2P2,FAR2P1,HIC2,WASHC2A,PKD1P4-NPIPA8,ZDHHC8P1,SBDSP1,FAM86EP,GTF2IP4,TVP23B,SPECC1L,FAR2P2,SHCBP1,RRN3P1,ASAH2B
	30701202	Beclin 1 regulates recycling endosome and is required for skin development in mice.	Pubmed	4.12	1000	34.71	343.2	3	27	GOLGA8N,GOLGA8K,GOLGA8O
	30516471	Wnt11 directs nephron progenitor polarity and motile behavior ultimately determining nephron endowment.	Pubmed	4.12	1000	34.71	343.2	3	27	GOLGA8N,GOLGA8K,GOLGA8O
	25438880	Pre-synaptic localization of the ?-secretase-inhibiting protein p24?2 in the mammalian brain.	Pubmed	4.12	1000	34.71	343.2	3	27	GOLGA8N,GOLGA8K,GOLGA8O
	23195221	Scribble is required for normal epithelial cell-cell contacts and lumen morphogenesis in the mammalian lung.	Pubmed	4.573	1000	34.71	343.2	3	28	GOLGA8N,GOLGA8K,GOLGA8O
	21880782	Cell dynamics in fetal intestinal epithelium: implications for intestinal growth and morphogenesis.	Pubmed	4.573	1000	34.71	343.2	3	28	GOLGA8N,GOLGA8K,GOLGA8O
	28941984	Neural crest cells utilize primary cilia to regulate ventral forebrain morphogenesis via Hedgehog-dependent regulation of oriented cell division.	Pubmed	4.573	1000	34.71	343.2	3	28	GOLGA8N,GOLGA8K,GOLGA8O
	16138909	Evidence by expression analysis of candidate genes for congenital heart defects in the NF1 microdeletion interval.	Pubmed	4.946	1000	34.71	343.2	2	9	RNF135,ADAP2
	12640130	GGAPs, a new family of bifunctional GTP-binding and GTPase-activating proteins.	Pubmed	4.946	1000	34.71	343.2	2	9	AGAP6,AGAP7P
	33046212	Cytotoxic T cells swarm by homotypic chemokine signalling.	Pubmed	4.946	1000	34.71	343.2	2	9	CCL4L2,CCL3L3
	10330122	Comparative mapping of the region of human chromosome 7 deleted in williams syndrome.	Pubmed	4.946	1000	34.71	343.2	2	9	NCF1C,NCF1B
	2521353	A family of small inducible proteins secreted by leukocytes are members of a new superfamily that includes leukocyte and fibroblast-derived inflammatory agents, growth factors, and indicators of various activation processes.	Pubmed	4.946	1000	34.71	343.2	2	9	CCL4L2,CCL3L3
	10433265	Targeted deletion of the Vgf gene indicates that the encoded secretory peptide precursor plays a novel role in the regulation of energy balance.	Pubmed	4.946	1000	34.71	343.2	2	9	NCF1C,NCF1B
	23064749	Evolutionary dynamism of the primate LRRC37 gene family.	Pubmed	4.946	1000	34.71	343.2	2	9	LRRC37A2,LRRC37A
	8748389	Chromosomal mapping of the psychomotor stimulant effects of cocaine in BXD recombinant inbred mice.	Pubmed	4.946	1000	34.71	343.2	2	9	DRD5,OPCML
	12654299	Left-right patterning of the mouse lateral plate requires nodal produced in the node.	Pubmed	4.946	1000	34.71	343.2	2	9	CFC1,CFC1B
	18773496	Left-asymmetric expression of Galanin in the linear heart tube of the mouse embryo is independent of the nodal co-receptor gene cryptic.	Pubmed	4.946	1000	34.71	343.2	2	9	CFC1,CFC1B
	20006992	Correlation of a set of gene variants, life events and personality features on adult ADHD severity.	Pubmed	4.946	1000	34.71	343.2	2	9	CHRNA7,DRD5
	17525185	Expression of Th-1 chemokines and chemokine receptors on the ocular surface of C57BL/6 mice: effects of desiccating stress.	Pubmed	4.946	1000	34.71	343.2	2	9	CCL4L2,CCL3L3
	14761932	Reduced GRK2 level in T cells potentiates chemotaxis and signaling in response to CCL4.	Pubmed	4.946	1000	34.71	343.2	2	9	CCL4L2,CCL3L3
	10447107	Developmental expression of NADPH phagocytic oxidase components in mouse embryos.	Pubmed	4.946	1000	34.71	343.2	2	9	NCF1C,NCF1B
	7789623	Genetic linkage of thymic T-cell proliferative unresponsiveness to mouse chromosome 11 in NOD mice. A possible role for chemokine genes.	Pubmed	4.946	1000	34.71	343.2	2	9	CCL4L2,CCL3L3
	20046229	Fat-storing multilocular cells expressing CCR5 increase in the thymus with advancing age: potential role for CCR5 ligands on the differentiation and migration of preadipocytes.	Pubmed	4.946	1000	34.71	343.2	2	9	CCL4L2,CCL3L3
	9114010	Cloning and characterization of human karyopherin beta3.	Pubmed	4.946	1000	34.71	343.2	2	9	IPO5,RANBP2
	12393595	Marked increase in CC chemokine gene expression in both human and mouse mast cell transcriptomes following Fcepsilon receptor I cross-linking: an interspecies comparison.	Pubmed	4.946	1000	34.71	343.2	2	9	CCL4L2,CCL3L3
	21160041	Neutrophils require SHP1 to regulate IL-1? production and prevent inflammatory skin disease.	Pubmed	4.946	1000	34.71	343.2	2	9	NCF1C,NCF1B
	11991713	An evaluation of the assembly of an approximately 15-Mb region on human chromosome 13q32-q33 linked to bipolar disorder and schizophrenia.	Pubmed	5.056	1000	34.71	343.2	3	29	UGGT2,HS6ST3,IPO5
	31436800	Decreased Activity of the Ghrhr and Gh Promoters Causes Dominantly Inherited GH Deficiency in Humanized GH1 Mouse Models.	Pubmed	5.056	1000	34.71	343.2	3	29	GOLGA8N,GOLGA8K,GOLGA8O
	20568244	Ttyh1, a Ca(2+)-binding protein localized to the endoplasmic reticulum, is required for early embryonic development.	Pubmed	5.056	1000	34.71	343.2	3	29	GOLGA8N,GOLGA8K,GOLGA8O
	30228103	Secretory pathway calcium ATPase 1 (SPCA1) controls mouse neural tube closure by regulating cytoskeletal dynamics.	Pubmed	5.056	1000	34.71	343.2	3	29	GOLGA8N,GOLGA8K,GOLGA8O
	21098570	Epithelial dynamics of pancreatic branching morphogenesis.	Pubmed	5.568	1000	34.71	343.2	3	30	GOLGA8N,GOLGA8K,GOLGA8O
	26496195	Protein O-Glucosyltransferase 1 (POGLUT1) Promotes Mouse Gastrulation through Modification of the Apical Polarity Protein CRUMBS2.	Pubmed	5.568	1000	34.71	343.2	3	30	GOLGA8N,GOLGA8K,GOLGA8O
	17765678	Failure of epithelial tube maintenance causes hydrocephalus and renal cysts in Dlg5-/- mice.	Pubmed	6.11	1000	34.71	343.2	3	31	GOLGA8N,GOLGA8K,GOLGA8O
	25762570	Adamtsl2 deletion results in bronchial fibrillin microfibril accumulation and bronchial epithelial dysplasia--a novel mouse model providing insights into geleophysic dysplasia.	Pubmed	6.11	1000	34.71	343.2	3	31	GOLGA8N,GOLGA8K,GOLGA8O
	11435397	The human ATP-binding cassette (ABC) transporter superfamily.	Pubmed	6.134	1000	34.71	343.2	2	10	ABCC11,ABCC12
	21212270	Control of hepatic nuclear superoxide production by glucose 6-phosphate dehydrogenase and NADPH oxidase-4.	Pubmed	6.134	1000	34.71	343.2	2	10	NCF1C,NCF1B
	10944119	Exportin 4: a mediator of a novel nuclear export pathway in higher eukaryotes.	Pubmed	6.134	1000	34.71	343.2	2	10	IPO5,EIF5AL1
	20664521	AGAP1/AP-3-dependent endocytic recycling of M5 muscarinic receptors promotes dopamine release.	Pubmed	6.134	1000	34.71	343.2	2	10	AGAP6,AGAP7P
	8496601	Genomic cloning and promoter analysis of macrophage inflammatory protein (MIP)-2, MIP-1 alpha, and MIP-1 beta, members of the chemokine superfamily of proinflammatory cytokines.	Pubmed	6.134	1000	34.71	343.2	2	10	CCL4L2,CCL3L3
	17913787	Sulfated glycosaminoglycans are necessary for Nodal signal transmission from the node to the left lateral plate in the mouse embryo.	Pubmed	6.134	1000	34.71	343.2	2	10	CFC1,CFC1B
	18566004	CC family chemokines directly regulate myoblast responses to skeletal muscle injury.	Pubmed	6.134	1000	34.71	343.2	2	10	CCL4L2,CCL3L3
	24185898	Autophagy proteins control goblet cell function by potentiating reactive oxygen species production.	Pubmed	6.134	1000	34.71	343.2	2	10	NCF1C,NCF1B
	11756344	Congenic mapping of the diabetogenic locus Idd4 to a 5.2-cM region of chromosome 11 in NOD mice: identification of two potential candidate subloci.	Pubmed	6.134	1000	34.71	343.2	2	10	CCL4L2,CCL3L3
	24115276	The regulation and deregulation of Wnt signaling by PARK genes in health and disease.	Pubmed	6.134	1000	34.71	343.2	2	10	VPS35,PRKN
	23639811	Hepatocytes produce TNF-? following hypoxia-reoxygenation and liver ischemia-reperfusion in a NADPH oxidase- and c-Src-dependent manner.	Pubmed	6.134	1000	34.71	343.2	2	10	NCF1C,NCF1B
	27312108	Molecular insights into RBR E3 ligase ubiquitin transfer mechanisms.	Pubmed	6.134	1000	34.71	343.2	2	10	UBE2L3,PRKN
	30181240	The pseudokinase MLKL activates PAD4-dependent NET formation in necroptotic neutrophils.	Pubmed	6.134	1000	34.71	343.2	2	10	NCF1C,NCF1B
	23863468	Renalase regulates renal dopamine and phosphate metabolism.	Pubmed	6.134	1000	34.71	343.2	2	10	GGT1,GGT3P
	23535730	GWAS meta-analysis and replication identifies three new susceptibility loci for ovarian cancer.	Pubmed	6.682	1000	34.71	343.2	3	32	TBC1D3F,MRPL45,TBC1D3
	23704327	The giant spectrin ?V couples the molecular motors to phototransduction and Usher syndrome type I proteins along their trafficking route.	Pubmed	6.682	1000	34.71	343.2	3	32	GOLGA8N,GOLGA8K,GOLGA8O
	15381706	AGAP1, a novel binding partner of nitric oxide-sensitive guanylyl cyclase.	Pubmed	7.437	1000	34.71	343.2	2	11	AGAP6,AGAP7P
	25895671	Early inflammatory mediator gene expression in two models of traumatic brain injury: ex vivo cortical slice in mice and in vivo cortical impact in piglets.	Pubmed	7.437	1000	34.71	343.2	2	11	CCL4L2,CCL3L3
	15475956	Cited2 controls left-right patterning and heart development through a Nodal-Pitx2c pathway.	Pubmed	7.437	1000	34.71	343.2	2	11	CFC1,CFC1B
	10235110	Genomic organization of the genes for human and mouse CC chemokine LEC.	Pubmed	7.437	1000	34.71	343.2	2	11	CCL4L2,CCL3L3
	15611273	Hemozoin induces macrophage chemokine expression through oxidative stress-dependent and -independent mechanisms.	Pubmed	7.437	1000	34.71	343.2	2	11	CCL4L2,CCL3L3
	7594543	Molecular characterization of two murine eosinophil beta chemokine receptors.	Pubmed	7.437	1000	34.71	343.2	2	11	CCL4L2,CCL3L3
	21247419	Rasd1 interacts with Ear2 (Nr2f6) to regulate renin transcription.	Pubmed	7.437	1000	34.71	343.2	2	11	RNASE2,RNASE3
	12073013	Identification of additional transcripts in the Williams-Beuren syndrome critical region.	Pubmed	7.437	1000	34.71	343.2	2	11	NSUN5P2,NSUN5
	11972057	MIP-1alpha, MIP-1beta, RANTES, and ATAC/lymphotactin function together with IFN-gamma as type 1 cytokines.	Pubmed	7.437	1000	34.71	343.2	2	11	CCL4L2,CCL3L3
	26965651	CCC- and WASH-mediated endosomal sorting of LDLR is required for normal clearance of circulating LDL.	Pubmed	7.437	1000	34.71	343.2	2	11	COMMD1,VPS35
	15908387	Gamma interferon-induced T-cell loss in virulent Mycobacterium avium infection.	Pubmed	7.437	1000	34.71	343.2	2	11	NCF1C,NCF1B
	29180628	Parkin targets HIF-1? for ubiquitination and degradation to inhibit breast tumor progression.	Pubmed	7.437	1000	34.71	343.2	2	11	UBE2L3,PRKN
	10594742	Mouse langerhans cells differentially express an activated T cell-attracting CC chemokine.	Pubmed	7.437	1000	34.71	343.2	2	11	CCL4L2,CCL3L3
	23533177	Lis1 mediates planar polarity of auditory hair cells through regulation of microtubule organization.	Pubmed	7.92	1000	34.71	343.2	3	34	GOLGA8N,GOLGA8K,GOLGA8O
	19956733	Palmitoylation regulates epidermal homeostasis and hair follicle differentiation.	Pubmed	7.92	1000	34.71	343.2	3	34	GOLGA8N,GOLGA8K,GOLGA8O
	23926254	Goofy coordinates the acuity of olfactory signaling.	Pubmed	7.92	1000	34.71	343.2	3	34	GOLGA8N,GOLGA8K,GOLGA8O
	20398908	Comprehensive copy number variant (CNV) analysis of neuronal pathways genes in psychiatric disorders identifies rare variants within patients.	Pubmed	8.828	1000	34.71	343.2	4	67	DGCR6,PRODH,DRD5,NSF
	8661057	A YAC contig of the human CC chemokine genes clustered on chromosome 17q11.2.	Pubmed	8.854	1000	34.71	343.2	2	12	CCL4L2,CCL3L3
	21035758	Atherogenic lipids and lipoproteins trigger CD36-TLR2-dependent apoptosis in macrophages undergoing endoplasmic reticulum stress.	Pubmed	8.854	1000	34.71	343.2	2	12	NCF1C,NCF1B
	26387737	Parkin Regulates Mitosis and Genomic Stability through Cdc20/Cdh1.	Pubmed	8.854	1000	34.71	343.2	2	12	UBE2L3,PRKN
	33373584	Structural analysis of RIG-I-like receptors reveals ancient rules of engagement between diverse RNA helicases and TRIM ubiquitin ligases.	Pubmed	8.854	1000	34.71	343.2	2	12	DDX58,RNF135
	9875846	Identification of ligands for olfactory receptors by functional expression of a receptor library.	Pubmed	8.854	1000	34.71	343.2	2	12	OR1A1,OR1A2
	19283362	Prevention of neural tube defects by loss of function of inducible nitric oxide synthase in fetuses of a mouse model of streptozotocin-induced diabetes.	Pubmed	8.854	1000	34.71	343.2	2	12	NCF1C,NCF1B
	15676279	The ribonuclease A superfamily of mammals and birds: identifying new members and tracing evolutionary histories.	Pubmed	8.854	1000	34.71	343.2	2	12	RNASE2,RNASE3
	21057511	Caspase-1-induced pyroptosis is an innate immune effector mechanism against intracellular bacteria.	Pubmed	8.854	1000	34.71	343.2	2	12	NCF1C,NCF1B
	30026494	Synchronized mesenchymal cell polarization and differentiation shape the formation of the murine trachea and esophagus.	Pubmed	9.283	1000	34.71	343.2	3	36	GOLGA8N,GOLGA8K,GOLGA8O
	25742799	Morphogenesis of the mouse neural plate depends on distinct roles of cofilin 1 in apical and basal epithelial domains.	Pubmed	10.01	1000	34.71	343.2	3	37	GOLGA8N,GOLGA8K,GOLGA8O
	19266077	Genetic determinants of height growth assessed longitudinally from infancy to adulthood in the northern Finland birth cohort 1966.	Pubmed	10.01	1000	34.71	343.2	3	37	ADAP2,ADAMTS17,ADAMTSL3
	21725307	A transition zone complex regulates mammalian ciliogenesis and ciliary membrane composition.	Pubmed	10.01	1000	34.71	343.2	3	37	GOLGA8N,GOLGA8K,GOLGA8O
	19240029	The ubiquitin-interacting motif protein, S5a, is ubiquitinated by all types of ubiquitin ligases by a mechanism different from typical substrate recognition.	Pubmed	10.38	1000	34.71	343.2	2	13	UBE2L3,PRKN
	8530103	Chromosomal localization of mouse and human genes encoding the splicing factors ASF/SF2 (SFRS1) and SC-35 (SFRS2).	Pubmed	10.38	1000	34.71	343.2	2	13	CCL4L2,CCL3L3
	18550712	BMP antagonism is required in both the node and lateral plate mesoderm for mammalian left-right axis establishment.	Pubmed	10.38	1000	34.71	343.2	2	13	CFC1,CFC1B
	26572063	Inflammasomes Coordinate Pyroptosis and Natural Killer Cell Cytotoxicity to Clear Infection by a Ubiquitous Environmental Bacterium.	Pubmed	10.38	1000	34.71	343.2	2	13	NCF1C,NCF1B
	18423196	Identification of oxidative stress and Toll-like receptor 4 signaling as a key pathway of acute lung injury.	Pubmed	10.38	1000	34.71	343.2	2	13	NCF1C,NCF1B
	27713690	The Endosome Localized Arf-GAP AGAP1 Modulates Dendritic Spine Morphology Downstream of the Neurodevelopmental Disorder Factor Dysbindin.	Pubmed	10.38	1000	34.71	343.2	2	13	AGAP6,AGAP7P
	24337645	Comparative genomic analysis of eutherian ribonuclease A genes.	Pubmed	10.38	1000	34.71	343.2	2	13	RNASE2,RNASE3
	25847238	Hepatic serum amyloid A1 aggravates T cell-mediated hepatitis by inducing chemokines via Toll-like receptor 2 in mice.	Pubmed	10.38	1000	34.71	343.2	2	13	CCL4L2,CCL3L3
	26595272	FGF signalling regulates bone growth through autophagy.	Pubmed	10.78	1000	34.71	343.2	3	38	GOLGA8N,GOLGA8K,GOLGA8O
	8075499	Maps from two interspecific backcross DNA panels available as a community genetic mapping resource.	Pubmed	11.31	1000	34.71	343.2	4	72	SULT1A2,SULT1A1,SULT1A3,SULT1A4
	21606205	Global defects in collagen secretion in a Mia3/TANGO1 knockout mouse.	Pubmed	11.57	1000	34.71	343.2	3	39	GOLGA8N,GOLGA8K,GOLGA8O
	21980368	MicroRNAs associated with metastatic prostate cancer.	Pubmed	11.57	1000	34.71	343.2	3	39	MIR5701-3,MIR5701-2,MIR5701-1
	20940148	The Machado-Joseph disease-associated mutant form of ataxin-3 regulates parkin ubiquitination and stability.	Pubmed	12.01	1000	34.71	343.2	2	14	UBE2L3,PRKN
	22960654	Signaling lymphocyte activation molecule regulates development of colitis in mice.	Pubmed	12.01	1000	34.71	343.2	2	14	CCL4L2,CCL3L3
	7594550	Molecular cloning and functional characterization of a novel member of the C-C chemokine family.	Pubmed	12.01	1000	34.71	343.2	2	14	CCL4L2,CCL3L3
	22453919	GTP-binding protein-like domain of AGAP1 is protein binding site that allosterically regulates ArfGAP protein catalytic activity.	Pubmed	12.01	1000	34.71	343.2	2	14	AGAP6,AGAP7P
	33730615	Maternal Cripto is critical for proper development of the mouse placenta and the placental vasculature.	Pubmed	12.01	1000	34.71	343.2	2	14	CFC1,CFC1B
	25595646	Enhanced inflammation in aged mice following infection with Streptococcus pneumoniae is associated with decreased IL-10 and augmented chemokine production.	Pubmed	12.01	1000	34.71	343.2	2	14	CCL4L2,CCL3L3
	17210915	Baf60c is a nuclear Notch signaling component required for the establishment of left-right asymmetry.	Pubmed	12.01	1000	34.71	343.2	2	14	CFC1,CFC1B
	33570211	Genetic Variations and Neuropathologic Features of Patients with PRKN Mutations.	Pubmed	12.22	1000	34.71	343.2	1	1	PRKN
	19639743	Eosinophilic esophagitis due to profilin allergy.	Pubmed	12.22	1000	34.71	343.2	1	1	RNASE3
	17445335	Variants of the CFC1 gene in patients with laterality defects associated with congenital cardiac disease.	Pubmed	12.22	1000	34.71	343.2	1	1	CFC1
	26187414	A Conserved Histidine in the RNA Sensor RIG-I Controls Immune Tolerance to N1-2'O-Methylated Self RNA.	Pubmed	12.22	1000	34.71	343.2	1	1	DDX58
	27765635	Molecular Analysis of Hybrid Neurofibroma/Schwannoma Identifies Common Monosomy 22 and ?-T-Catenin/CTNNA3 as a Novel Candidate Tumor Suppressor.	Pubmed	12.22	1000	34.71	343.2	1	1	CTNNA3
	12972428	Inactivation of parkin by oxidative stress and C-terminal truncations: a protective role of molecular chaperones.	Pubmed	12.22	1000	34.71	343.2	1	1	PRKN
	9693040	Fine-mapping, genomic organization, and transcript analysis of the human ubiquitin-conjugating enzyme gene UBE2L3.	Pubmed	12.22	1000	34.71	343.2	1	1	UBE2L3
	18824584	Human PMS2 deficiency is associated with impaired immunoglobulin class switch recombination.	Pubmed	12.22	1000	34.71	343.2	1	1	PMS2
	23470638	Parkin deficiency contributes to pancreatic tumorigenesis by inducing spindle multipolarity and misorientation.	Pubmed	12.22	1000	34.71	343.2	1	1	PRKN
	8418809	Molecular cloning of a novel mRNA sequence expressed in cleavage stage mouse embryos.	Pubmed	12.22	1000	34.71	343.2	1	1	CAB39
	23832075	Metabolic adaptations to short-term every-other-day feeding in long-living Ames dwarf mice.	Pubmed	12.22	1000	34.71	343.2	1	1	PROP1
	34673028	A single amino acid mutation in the mouse MEIG1 protein disrupts a cargo transport system necessary for sperm formation.	Pubmed	12.22	1000	34.71	343.2	1	1	MEIG1
	28610873	Williams syndrome transcription factor (WSTF) acts as an activator of estrogen receptor signaling in breast cancer cells and the effect can be abrogated by 1?,25-dihydroxyvitamin D	Pubmed	12.22	1000	34.71	343.2	1	1	BAZ1B
	24793337	Nonmosaic tetrasomy 15q25.2†?†qter identified with SNP microarray in a patient with characteristic facial appearance and review of the literature.	Pubmed	12.22	1000	34.71	343.2	1	1	ADAMTSL3
	28975709	Ubiquitin-Conjugating Enzyme E2 L3 is Downregulated by the Chikungunya Virus nsP2 Protease.	Pubmed	12.22	1000	34.71	343.2	1	1	UBE2L3
	27572506	Multilayered regulations of RIG-I in the anti-viral signaling pathway.	Pubmed	12.22	1000	34.71	343.2	1	1	DDX58
	30074231	Loss of Microglial Parkin Inhibits Necroptosis and Contributes to Neuroinflammation.	Pubmed	12.22	1000	34.71	343.2	1	1	PRKN
	30809632	Identification of long non-coding RNA HERC2P2 as a tumor suppressor in glioma.	Pubmed	12.22	1000	34.71	343.2	1	1	HERC2P2
	23802200	Inter-residue coupling contributes to high-affinity subtype-selective binding of ?-bungarotoxin to nicotinic receptors.	Pubmed	12.22	1000	34.71	343.2	1	1	CHRNA7
	31638200	Upregulated expression of eIF3C is associated with malignant behavior in renal cell carcinoma.	Pubmed	12.22	1000	34.71	343.2	1	1	EIF3C
	16449237	Parkin enhances mitochondrial biogenesis in proliferating cells.	Pubmed	12.22	1000	34.71	343.2	1	1	PRKN
	15126542	Pituitary magnetic resonance imaging in 15 patients with Prop1 gene mutations: pituitary enlargement may originate from the intermediate lobe.	Pubmed	12.22	1000	34.71	343.2	1	1	PROP1
	10767579	Catalase expression in delayed and premature aging mouse models.	Pubmed	12.22	1000	34.71	343.2	1	1	PROP1
	29393141	LINC00037 Inhibits Proliferation of Renal Cell Carcinoma Cells in an Epidermal Growth Factor Receptor-Dependent Way.	Pubmed	12.22	1000	34.71	343.2	1	1	DGCR5
	15001974	A novel functional polymorphism in the uridine diphosphate-glucuronosyltransferase 2B7 promoter with significant impact on promoter activity.	Pubmed	12.22	1000	34.71	343.2	1	1	UGT2B7
	20463046	Degeneration of an intracellular ion channel in the primate lineage by relaxation of selective constraints.	Pubmed	12.22	1000	34.71	343.2	1	1	LOC440895
	15302915	GATA-4 and MEF2C transcription factors control the tissue-specific expression of the alphaT-catenin gene CTNNA3.	Pubmed	12.22	1000	34.71	343.2	1	1	CTNNA3
	18987455	Association between serum gamma-glutamyl transferase level and prehypertension among community-dwelling men.	Pubmed	12.22	1000	34.71	343.2	1	1	GGT1
	19050060	Regulation of neural macroRNAs by the transcriptional repressor REST.	Pubmed	12.22	1000	34.71	343.2	1	1	DGCR5
	26152752	?-Glutamyl Transferase Is Associated with Mortality Outcomes Independently of Fatty Liver.	Pubmed	12.22	1000	34.71	343.2	1	1	GGT1
	12972409	Novel monoclonal antibodies demonstrate biochemical variation of brain parkin with age.	Pubmed	12.22	1000	34.71	343.2	1	1	PRKN
	18602922	The clinical phenotype of Lynch syndrome due to germ-line PMS2 mutations.	Pubmed	12.22	1000	34.71	343.2	1	1	PMS2
	7802665	Genomic organization and DNA sequence of the human catecholamine-sulfating phenol sulfotransferase gene (STM).	Pubmed	12.22	1000	34.71	343.2	1	1	SULT1A3
	2112230	Small GTP-binding protein associated with Golgi cisternae.	Pubmed	12.22	1000	34.71	343.2	1	1	RAB6A
	29025375	Dopamine-induced SULT1A3/4 promotes EMT and cancer stemness in hepatocellular carcinoma.	Pubmed	12.22	1000	34.71	343.2	1	1	SULT1A3
	12524184	Development of the mouse vestibular system in the absence of gravity perception.	Pubmed	12.22	1000	34.71	343.2	1	1	OTOP1
	24113188	Down-modulation of nucleoporin RanBP2/Nup358 impaired chromosomal alignment and induced mitotic catastrophe.	Pubmed	12.22	1000	34.71	343.2	1	1	RANBP2
	18293932	Eosinophil cationic protein high-affinity binding to bacteria-wall lipopolysaccharides and peptidoglycans.	Pubmed	12.22	1000	34.71	343.2	1	1	RNASE3
	18393235	[The transmission disequilibrium analysis between neuronal nicotinic acetylcholine receptor alpha 7 subunit gene polymorphisms and schizophrenia].	Pubmed	12.22	1000	34.71	343.2	1	1	CHRNA7
	14725789	Characterization of TCR-induced phosphorylation of PKCtheta in primary murine lymphocytes.	Pubmed	12.22	1000	34.71	343.2	1	1	PRKCQ
	15150272	Engagement of protein kinase C-theta in interferon signaling in T-cells.	Pubmed	12.22	1000	34.71	343.2	1	1	PRKCQ
	8178837	Sequential strategy to identify a susceptibility gene for schizophrenia: report of potential linkage on chromosome 22q12-q13.1: Part 1.	Pubmed	12.22	1000	34.71	343.2	1	1	PRODH
	11805062	Maternal effect for DNA mismatch repair in the mouse.	Pubmed	12.22	1000	34.71	343.2	1	1	PMS2
	19350537	An investigation of the relationship between SULT1A1 Arg(213)His polymorphism and lung cancer susceptibility in a Turkish population.	Pubmed	12.22	1000	34.71	343.2	1	1	SULT1A1
	2563599	Regulation of the expression of some genes for enzymes of glutathione metabolism in hepatotoxicity and hepatocarcinogenesis.	Pubmed	12.22	1000	34.71	343.2	1	1	GGT1
	19240178	Expression of ABCC-type nucleotide exporters in blasts of adult acute myeloid leukemia: relation to long-term survival.	Pubmed	12.22	1000	34.71	343.2	1	1	ABCC11
	11154698	Mapping the ribonucleolytic active site of eosinophil-derived neurotoxin (EDN). High resolution crystal structures of EDN complexes with adenylic nucleotide inhibitors.	Pubmed	12.22	1000	34.71	343.2	1	1	RNASE2
	19176815	Head direction cell activity in mice: robust directional signal depends on intact otolith organs.	Pubmed	12.22	1000	34.71	343.2	1	1	OTOP1
	25865804	Linking a compound-heterozygous Parkin mutant (Q311R and A371T) to Parkinson's disease by using proteomic and molecular approaches.	Pubmed	12.22	1000	34.71	343.2	1	1	PRKN
	19240172	Triptolide inhibits Bcr-Abl transcription and induces apoptosis in STI571-resistant chronic myelogenous leukemia cells harboring T315I mutation.	Pubmed	12.22	1000	34.71	343.2	1	1	BCR
	27789685	hnRNPs and ELAVL1 cooperate with uORFs to inhibit protein translation.	Pubmed	12.22	1000	34.71	343.2	1	1	ANXA2R
	29259080	Identification of a second binding site on the TRIM25 B30.2 domain.	Pubmed	12.22	1000	34.71	343.2	1	1	DDX58
	27183438	Overexpression of Annexin II Receptor-Induced Autophagy Protects Against Apoptosis in Uveal Melanoma Cells.	Pubmed	12.22	1000	34.71	343.2	1	1	ANXA2R
	23118418	A structure-based model of RIG-I activation.	Pubmed	12.22	1000	34.71	343.2	1	1	DDX58
	27576013	Autosomal recessive agammaglobulinemia associated with an IGLL1 gene missense mutation.	Pubmed	12.22	1000	34.71	343.2	1	1	IGLL1
	18697200	Angiostatic immune reaction in colorectal carcinoma: Impact on survival and perspectives for antiangiogenic therapy.	Pubmed	12.22	1000	34.71	343.2	1	1	GBP1
	34413083	Gene Knockout Negatively Impacts Aspects of Reversal Learning Performance.	Pubmed	12.22	1000	34.71	343.2	1	1	SYN3
	27663795	PRKCQ promotes oncogenic growth and anoikis resistance of a subset of triple-negative breast cancer cells.	Pubmed	12.22	1000	34.71	343.2	1	1	PRKCQ
	1378736	Gamma-glutamyltransferase: nucleotide sequence of the human pancreatic cDNA. Evidence for a ubiquitous gamma-glutamyltransferase polypeptide in human tissues.	Pubmed	12.22	1000	34.71	343.2	1	1	GGT1
	25486126	Behavioral phenotyping of Parkin-deficient mice: looking for early preclinical features of Parkinson's disease.	Pubmed	12.22	1000	34.71	343.2	1	1	PRKN
	26108624	The disease-linked Glu-26-Lys mutant version of Coronin 1A exhibits pleiotropic and pathway-specific signaling defects.	Pubmed	12.22	1000	34.71	343.2	1	1	CORO1A
	27807998	Discovery and pharmacological effects of a novel GPR142 antagonist.	Pubmed	12.22	1000	34.71	343.2	1	1	GPR142
	15248918	[Polymorphism analysis of 5' promotor region of BCR gene].	Pubmed	12.22	1000	34.71	343.2	1	1	BCR
	14965249	The MRP-related and BCRP/ABCG2 multidrug resistance proteins: biology, substrate specificity and regulation.	Pubmed	12.22	1000	34.71	343.2	1	1	ABCC12
	16631477	A Ph-negative chronic myeloid leukemia with a complex BCR/ABL rearrangement and a t(6;9)(p21;q34.1).	Pubmed	12.22	1000	34.71	343.2	1	1	BCR
	26452313	A Uridine Glucuronosyltransferase 2B7 Polymorphism Predicts Epirubicin Clearance and Outcomes in Early-Stage Breast Cancer.	Pubmed	12.22	1000	34.71	343.2	1	1	UGT2B7
	10903870	Three-dimensional crystal structure of human eosinophil cationic protein (RNase 3) at 1.75 A resolution.	Pubmed	12.22	1000	34.71	343.2	1	1	RNASE3
	17324265	Effective quantitative real-time polymerase chain reaction analysis of the parkin gene (PARK2) exon 1-12 dosage.	Pubmed	12.22	1000	34.71	343.2	1	1	PRKN
	32507381	Higher levels of ?7 nicotinic receptors, but not choline acetyltransferase, in the dorsolateral prefrontal cortex from a sub-group of patients with schizophrenia.	Pubmed	12.22	1000	34.71	343.2	1	1	CHRNA7
	15696326	Dopamine D5 receptor modulates male and female sexual behavior in mice.	Pubmed	12.22	1000	34.71	343.2	1	1	DRD5
	17223693	Topography studies on the membrane interaction mechanism of the eosinophil cationic protein.	Pubmed	12.22	1000	34.71	343.2	1	1	RNASE3
	19057528	Relationship of serum gamma-glutamyltransferase to atherogenic dyslipidemia and glycemic control in type 2 diabetes.	Pubmed	12.22	1000	34.71	343.2	1	1	GGT1
	27325888	Human USP18 deficiency underlies type 1 interferonopathy leading to severe pseudo-TORCH syndrome.	Pubmed	12.22	1000	34.71	343.2	1	1	USP18
	19128366	Molecular analysis of novel PROP1 mutations associated with combined pituitary hormone deficiency (CPHD).	Pubmed	12.22	1000	34.71	343.2	1	1	PROP1
	24152735	The Rac-GAP Bcr is a novel regulator of the Par complex that controls cell polarity.	Pubmed	12.22	1000	34.71	343.2	1	1	BCR
	26013825	Human ?-Glutamyl Transpeptidase 1: STRUCTURES OF THE FREE ENZYME, INHIBITOR-BOUND TETRAHEDRAL TRANSITION STATES, AND GLUTAMATE-BOUND ENZYME REVEAL NOVEL MOVEMENT WITHIN THE ACTIVE SITE DURING CATALYSIS.	Pubmed	12.22	1000	34.71	343.2	1	1	GGT1
	31088527	Induction of tolerogenic dendritic cells by activated TGF-?/Akt/Smad2 signaling in RIG-I-deficient stemness-high human liver cancer cells.	Pubmed	12.22	1000	34.71	343.2	1	1	DDX58
	15212953	Human poly(ADP-ribose) glycohydrolase is expressed in alternative splice variants yielding isoforms that localize to different cell compartments.	Pubmed	12.22	1000	34.71	343.2	1	1	PARG
	1900918	Characterization of the BCR promoter in Philadelphia chromosome-positive and -negative cell lines.	Pubmed	12.22	1000	34.71	343.2	1	1	BCR
	4442	Studies of human kidney gamma-glutamyl transpeptidase. Purification and structural, kinetic and immunological properties.	Pubmed	12.22	1000	34.71	343.2	1	1	GGT1
	34156695	Ribosomal protein RPS15A augments proliferation of colorectal cancer RKO cells via regulation of BIRC3, p38 MAPK and Chk1.	Pubmed	12.22	1000	34.71	343.2	1	1	RPS15A
	18157385	Molecular analysis of PROP1, PIT1, HESX1, LHX3, and LHX4 shows high frequency of PROP1 mutations in patients with familial forms of combined pituitary hormone deficiency.	Pubmed	12.22	1000	34.71	343.2	1	1	PROP1
	34143396	Studies on the role of alpha 7 nicotinic acetylcholine receptors in K562 cell proliferation and signaling.	Pubmed	12.22	1000	34.71	343.2	1	1	CHRNA7
	20129611	Plasma bilirubin and gamma-glutamyltransferase activity are inversely related in dyslipidemic patients with metabolic syndrome: relevance to oxidative stress.	Pubmed	12.22	1000	34.71	343.2	1	1	GGT1
	22095653	Lack of association between p.Ser167Asn variant of Parkin and Parkinson's disease: a meta-analysis of 15 studies involving 2,280 cases and 2,459 controls.	Pubmed	12.22	1000	34.71	343.2	1	1	PRKN
	19122289	Inhibitory effects of herbal extracts on the activity of human sulfotransferase isoform sulfotransferase 1A3 (SULT1A3).	Pubmed	12.22	1000	34.71	343.2	1	1	SULT1A3
	22629402	TRIM16 acts as an E3 ubiquitin ligase and can heterodimerize with other TRIM family members.	Pubmed	12.22	1000	34.71	343.2	1	1	TRIM16
	12094019	Humoral immune response in mice over-expressing or deficient in growth hormone.	Pubmed	12.22	1000	34.71	343.2	1	1	PROP1
	20620130	Impaired in vivo dopamine release in parkin knockout mice.	Pubmed	12.22	1000	34.71	343.2	1	1	PRKN
	17465879	Cell type-specific upregulation of Parkin in response to ER stress.	Pubmed	12.22	1000	34.71	343.2	1	1	PRKN
	11802779	Role of glutathione in the multidrug resistance protein 4 (MRP4/ABCC4)-mediated efflux of cAMP and resistance to purine analogues.	Pubmed	12.22	1000	34.71	343.2	1	1	ABCC11
	24391883	CHRNA7 polymorphisms and response to cholinesterase inhibitors in Alzheimer's disease.	Pubmed	12.22	1000	34.71	343.2	1	1	CHRNA7
	31090814	Combined pituitary hormone deficiency caused by PROP1 mutations: update 20 years post-discovery.	Pubmed	12.22	1000	34.71	343.2	1	1	PROP1
	32436607	Parkin ubiquitinates GATA4 and attenuates the GATA4/GAS1 signaling and detrimental effects on diabetic nephropathy.	Pubmed	12.22	1000	34.71	343.2	1	1	PRKN
	9927279	Characteristics of a highly labile human type 5 17beta-hydroxysteroid dehydrogenase.	Pubmed	12.22	1000	34.71	343.2	1	1	AKR1C3
	27480019	Meta-analysis of the DRD5 VNTR in persistent ADHD.	Pubmed	12.22	1000	34.71	343.2	1	1	DRD5
	30883634	A functional single nucleotide polymorphism in ABCC11, rs17822931, is associated with the risk of breast cancer in Japanese.	Pubmed	12.22	1000	34.71	343.2	1	1	ABCC11
	17804567	Serum eosinophil cationic protein: a marker of disease activity in Churg-Strauss syndrome.	Pubmed	12.22	1000	34.71	343.2	1	1	RNASE3
	20068173	Identification of USP18 as an important regulator of the susceptibility to IFN-alpha and drug-induced apoptosis.	Pubmed	12.22	1000	34.71	343.2	1	1	USP18
	31656003	Peculiarities of RIG-1 Expression in Placental Villi in Preeclampsia.	Pubmed	12.22	1000	34.71	343.2	1	1	DDX58
	3926759	Purification and properties of bovine kidney ribonucleases.	Pubmed	12.22	1000	34.71	343.2	1	1	RNASE2
	18800618	[Role of smoking and nicotine in neuropsychiatric disorders: evidence for therapeutic role of nicotinic acetylcholine receptors].	Pubmed	12.22	1000	34.71	343.2	1	1	CHRNA7
	24847614	Gamma-glutamyl transpeptidase level associated with metabolic syndrome and proinflammatory parameters in the young Roma population in eastern Slovakia: a population-based study.	Pubmed	12.22	1000	34.71	343.2	1	1	GGT5
	21962901	Eosinophilic activity and bronchial hyperresponsiveness within an asthmatic paediatric population.	Pubmed	12.22	1000	34.71	343.2	1	1	RNASE3
	29272031	Association between UDP-glucuronosyltransferase 2B7 tagSNPs and breast cancer risk in Chinese females.	Pubmed	12.22	1000	34.71	343.2	1	1	UGT2B7
	34601496	A new candidate oncogenic lncRNA derived from pseudogene WFDC21P promotes tumor progression in gastric cancer.	Pubmed	12.22	1000	34.71	343.2	1	1	WFDC21P
	17883392	The effects of oxidative stress on parkin and other E3 ligases.	Pubmed	12.22	1000	34.71	343.2	1	1	PRKN
	27129942	SHCBP1 is over-expressed in breast cancer and is important in the proliferation and apoptosis of the human malignant breast cancer cell line.	Pubmed	12.22	1000	34.71	343.2	1	1	SHCBP1
	11134108	Adrenocorticotropin deficiency in combined pituitary hormone deficiency patients homozygous for a novel PROP1 deletion.	Pubmed	12.22	1000	34.71	343.2	1	1	PROP1
	21454557	Parkin mediates proteasome-dependent protein degradation and rupture of the outer mitochondrial membrane.	Pubmed	12.22	1000	34.71	343.2	1	1	PRKN
	7695637	Human thermolabile phenol sulfotransferase gene (STM): molecular cloning and structural characterization.	Pubmed	12.22	1000	34.71	343.2	1	1	SULT1A3
	28656276	Lentivirus?mediated RIG?I knockdown relieves cell proliferation inhibition, cell cycle arrest and apoptosis in ATRA?induced NB4 cells via the AKT?FOXO3A signaling pathway in vitro.	Pubmed	12.22	1000	34.71	343.2	1	1	DDX58
	20219456	Recruitment of Orc6l, a dormant maternal mRNA in mouse oocytes, is essential for DNA replication in 1-cell embryos.	Pubmed	12.22	1000	34.71	343.2	1	1	ORC6
	32986843	Structural basis of DNA replication origin recognition by human Orc6 protein binding with DNA.	Pubmed	12.22	1000	34.71	343.2	1	1	ORC6
	33885766	The GBP1 microcapsule interferes with IcsA-dependent septin cage assembly around Shigella flexneri.	Pubmed	12.22	1000	34.71	343.2	1	1	GBP1
	28592529	Guanylate-Binding Protein 1 Inhibits Nuclear Delivery of Kaposi's Sarcoma-Associated Herpesvirus Virions by Disrupting Formation of Actin Filament.	Pubmed	12.22	1000	34.71	343.2	1	1	GBP1
	9244446	Localization of the gene encoding the Ran-binding protein RanBP2 to human chromosome 2q11-q13 by fluorescence in situ hybridization.	Pubmed	12.22	1000	34.71	343.2	1	1	RANBP2
	7633397	The D5 dopamine receptor gene in schizophrenia: identification of a nonsense change and multiple missense changes but lack of association with disease.	Pubmed	12.22	1000	34.71	343.2	1	1	DRD5
	23981985	Effect of UGT2B7 genetic variants on serum valproic acid concentration.	Pubmed	12.22	1000	34.71	343.2	1	1	UGT2B7
	32695241	Novel Value of Preoperative Gamma-Glutamyltransferase Levels in the Prognosis of AFP-Negative Hepatocellular Carcinoma.	Pubmed	12.22	1000	34.71	343.2	1	1	GGT1
	24571686	AKR1C3 overexpression may serve as a promising biomarker for prostate cancer progression.	Pubmed	12.22	1000	34.71	343.2	1	1	AKR1C3
	22827965	A physiological role for the dopamine D5 receptor as a regulator of BDNF and Akt signalling in rodent prefrontal cortex.	Pubmed	12.22	1000	34.71	343.2	1	1	DRD5
	31421903	OPCML: A Promising Biomarker and Therapeutic Avenue.	Pubmed	12.22	1000	34.71	343.2	1	1	OPCML
	16837855	Cellular parkin mutants are soluble under non-stress conditions.	Pubmed	12.22	1000	34.71	343.2	1	1	PRKN
	11739175	Heterogeneity of endothelial junctions is reflected by differential expression and specific subcellular localization of the three JAM family members.	Pubmed	12.22	1000	34.71	343.2	1	1	JAM3
	27480026	Genome Wide Association Study Identifies L3MBTL4 as a Novel Susceptibility Gene for Hypertension.	Pubmed	12.22	1000	34.71	343.2	1	1	L3MBTL4
	22796327	Proline dehydrogenase is essential for proline protection against hydrogen peroxide-induced cell death.	Pubmed	12.22	1000	34.71	343.2	1	1	PRODH
	26175398	Elevation of serum GGT and LDH levels, together with higher BCLC staging are associated with poor overall survival from hepatocellular carcinoma: a retrospective analysis.	Pubmed	12.22	1000	34.71	343.2	1	1	GGT1
	18188499	PARK2 mutations and clinical features in a Chinese population with early-onset Parkinson's disease.	Pubmed	12.22	1000	34.71	343.2	1	1	PRKN
	14729237	Association study of the human partially duplicated alpha7 nicotinic acetylcholine receptor genetic variant with bipolar disorder.	Pubmed	12.22	1000	34.71	343.2	1	1	CHRNA7
	31327190	[Expression of eosinophilic cationic protein in neutrophils and its effect on objective evaluation of nasal inflammation].	Pubmed	12.22	1000	34.71	343.2	1	1	RNASE3
	20542336	Genetic and functional study of the IPO5 gene in schizophrenia.	Pubmed	12.22	1000	34.71	343.2	1	1	IPO5
	31181967	The Prognostic Significance of	Pubmed	12.22	1000	34.71	343.2	1	1	EIF3C
	31759365	Repurposing Drugs by In Silico Methods to Target BCR Kinase Domain in Chronic Myeloid Leukemia.	Pubmed	12.22	1000	34.71	343.2	1	1	BCR
	24752751	Altered T-cell entry and egress in the absence of Coronin 1A attenuates murine acute graft versus host disease.	Pubmed	12.22	1000	34.71	343.2	1	1	CORO1A
	25468276	Levels of mRNA for dopaminergic receptor D? in circulating lymphocytes may be associated with subsequent response to interferon-? in patients with multiple sclerosis.	Pubmed	12.22	1000	34.71	343.2	1	1	DRD5
	17911097	The cyclophilin-like domain of Ran-binding protein-2 modulates selectively the activity of the ubiquitin-proteasome system and protein biogenesis.	Pubmed	12.22	1000	34.71	343.2	1	1	RANBP2
	27286703	Association of a PARK2 Germline Variant and Epithelial Ovarian Cancer in a Southern Brazilian Population.	Pubmed	12.22	1000	34.71	343.2	1	1	PRKN
	12415119	Down-regulation of parkin protein in transient focal cerebral ischemia: A link between stroke and degenerative disease?	Pubmed	12.22	1000	34.71	343.2	1	1	PRKN
	24692634	RIG-I detects mRNA of intracellular Salmonella enterica serovar Typhimurium during bacterial infection.	Pubmed	12.22	1000	34.71	343.2	1	1	DDX58
	12815654	Marked variation in clinical presentation and age of onset in a family with a heterozygous parkin mutation.	Pubmed	12.22	1000	34.71	343.2	1	1	PRKN
	19427400	Cloning and characterization of a novel intracellular protein p48.2 that negatively regulates cell cycle progression.	Pubmed	12.22	1000	34.71	343.2	1	1	CRLF3
	30450850	RPS15a Silencing Suppresses Cell Proliferation and Migration of Gastric Cancer.	Pubmed	12.22	1000	34.71	343.2	1	1	RPS15A
	31675180	De novo NSF mutations cause early infantile epileptic encephalopathy.	Pubmed	12.22	1000	34.71	343.2	1	1	NSF
	21147754	Bioenergetics of neurons inhibit the translocation response of Parkin following rapid mitochondrial depolarization.	Pubmed	12.22	1000	34.71	343.2	1	1	PRKN
	24334410	Fusobacterium nucleatum activates the immune response through retinoic acid-inducible gene I.	Pubmed	12.22	1000	34.71	343.2	1	1	DDX58
	19542456	The coding ECP 434(G>C) gene polymorphism determines the cytotoxicity of ECP but has minor effects on fibroblast-mediated gel contraction and no effect on RNase activity.	Pubmed	12.22	1000	34.71	343.2	1	1	RNASE3
	19716418	Parkinson's disease-associated parkin colocalizes with Alzheimer's disease and multiple sclerosis brain lesions.	Pubmed	12.22	1000	34.71	343.2	1	1	PRKN
	23325848	Conformational rearrangements of RIG-I receptor on formation of a multiprotein:dsRNA assembly.	Pubmed	12.22	1000	34.71	343.2	1	1	DDX58
	23210707	Whole-exome sequencing identifies a novel missense mutation in EDAR causing autosomal recessive hypohidrotic ectodermal dysplasia with bilateral amastia and palmoplantar hyperkeratosis.	Pubmed	12.22	1000	34.71	343.2	1	1	EDAR
	34320968	Altered neuronal physiology, development, and function associated with a common chromosome 15 duplication involving CHRNA7.	Pubmed	12.22	1000	34.71	343.2	1	1	CHRNA7
	26738519	At-Line Cellular Screening Methodology for Bioactives in Mixtures Targeting the ?7-Nicotinic Acetylcholine Receptor.	Pubmed	12.22	1000	34.71	343.2	1	1	CHRNA7
	32581291	Lysosomal perturbations in human dopaminergic neurons derived from induced pluripotent stem cells with PARK2 mutation.	Pubmed	12.22	1000	34.71	343.2	1	1	PRKN
	18940794	COMMD1 forms oligomeric complexes targeted to the endocytic membranes via specific interactions with phosphatidylinositol 4,5-bisphosphate.	Pubmed	12.22	1000	34.71	343.2	1	1	COMMD1
	24005326	The ubiquitin ligase parkin mediates resistance to intracellular pathogens.	Pubmed	12.22	1000	34.71	343.2	1	1	PRKN
	10439048	Mice defective in the DNA mismatch gene PMS2 are hypersensitive to MNU induced thymic lymphoma and are partially protected by transgenic expression of human MGMT.	Pubmed	12.22	1000	34.71	343.2	1	1	PMS2
	16234811	Transcriptional and behavioral interaction between 22q11.2 orthologs modulates schizophrenia-related phenotypes in mice.	Pubmed	12.22	1000	34.71	343.2	1	1	PRODH
	10700465	Mapping the B cell superantigen binding site for HIV-1 gp120 on a V(H)3 Ig.	Pubmed	12.22	1000	34.71	343.2	1	1	SLC7A4
	22308057	Pseudo-heterozygous rearrangement mutation of parkin.	Pubmed	12.22	1000	34.71	343.2	1	1	PRKN
	17944807	A heparan sulfate-facilitated and raft-dependent macropinocytosis of eosinophil cationic protein.	Pubmed	12.22	1000	34.71	343.2	1	1	RNASE3
	19038445	Local and global calcium signals associated with the opening of neuronal alpha7 nicotinic acetylcholine receptors.	Pubmed	12.22	1000	34.71	343.2	1	1	CHRNA7
	23192428	The emerging role of protein kinase C? in cytoskeletal signaling.	Pubmed	12.22	1000	34.71	343.2	1	1	PRKCQ
	31207307	Klotho restrain RIG-1/NF-?B signaling activation and monocyte inflammatory factor release under uremic condition.	Pubmed	12.22	1000	34.71	343.2	1	1	DDX58
	21531200	Transcriptional regulation of the human neutral ceramidase gene.	Pubmed	12.22	1000	34.71	343.2	1	1	ASAH2
	25960264	Autonomic involvement in Parkinsonian carriers of PARK2 gene mutations.	Pubmed	12.22	1000	34.71	343.2	1	1	PRKN
	24121678	Protective role of PARK2/Parkin in sepsis-induced cardiac contractile and mitochondrial dysfunction.	Pubmed	12.22	1000	34.71	343.2	1	1	PRKN
	21376568	Paediatric intestinal cancer and polyposis due to bi-allelic PMS2 mutations: case series, review and follow-up guidelines.	Pubmed	12.22	1000	34.71	343.2	1	1	PMS2
	17433394	Cigarette smoke toxicants as substrates and inhibitors for human cytosolic SULTs.	Pubmed	12.22	1000	34.71	343.2	1	1	SULT1A3
	11959925	A compelling genetic hypothesis for a complex disease: PRODH2/DGCR6 variation leads to schizophrenia susceptibility.	Pubmed	12.22	1000	34.71	343.2	1	1	DGCR6
	12525555	The severe form of type I hyperprolinaemia results from homozygous inactivation of the PRODH gene.	Pubmed	12.22	1000	34.71	343.2	1	1	PRODH
	32653576	Liver-specific Prkn knockout mice are more susceptible to diet-induced hepatic steatosis and insulin resistance.	Pubmed	12.22	1000	34.71	343.2	1	1	PRKN
	28735558	Nicotinic Receptor Abnormalities in the Cerebellar Cortex of Sudden Unexplained Fetal and Infant Death Victims-Possible Correlation With Maternal Smoking.	Pubmed	12.22	1000	34.71	343.2	1	1	CHRNA7
	30074152	Down-regulation of Helios Expression in Tregs from Patients with Hypertension.	Pubmed	12.22	1000	34.71	343.2	1	1	IKZF2
	23125461	A multi-centre clinico-genetic analysis of the VPS35 gene in Parkinson disease indicates reduced penetrance for disease-associated variants.	Pubmed	12.22	1000	34.71	343.2	1	1	VPS35
	22845717	Eosinophil cationic protein enhances cardiomyocyte differentiation of P19CL6 embryonal carcinoma cells by stimulating the FGF receptor signaling pathway.	Pubmed	12.22	1000	34.71	343.2	1	1	RNASE3
	22845733	Eosinophil cationic protein: overview of biological and genetic features.	Pubmed	12.22	1000	34.71	343.2	1	1	RNASE3
	16130151	Effect of overexpression of wild-type or mutant parkin on the cellular response induced by toxic insults.	Pubmed	12.22	1000	34.71	343.2	1	1	PRKN
	21979817	The RIG-I ATPase domain structure reveals insights into ATP-dependent antiviral signalling.	Pubmed	12.22	1000	34.71	343.2	1	1	DDX58
	34440743	UBE2L3, a Partner of MuRF1/TRIM63, Is Involved in the Degradation of Myofibrillar Actin and Myosin.	Pubmed	12.22	1000	34.71	343.2	1	1	UBE2L3
	14559775	Fine mapping of the alpha-T catenin gene to a quantitative trait locus on chromosome 10 in late-onset Alzheimer's disease pedigrees.	Pubmed	12.22	1000	34.71	343.2	1	1	CTNNA3
	9014197	Human phenol sulfotransferase pharmacogenetics: STP1 gene cloning and structural characterization.	Pubmed	12.22	1000	34.71	343.2	1	1	SULT1A1
	22152002	Rotavirus nonstructural protein 1 antagonizes innate immune response by interacting with retinoic acid inducible gene I.	Pubmed	12.22	1000	34.71	343.2	1	1	DDX58
	19755857	DNA damage responses by human ELG1 in S phase are important to maintain genomic integrity.	Pubmed	12.22	1000	34.71	343.2	1	1	ATAD5
	15181474	Retinoic acid-inducible gene-I is induced by interferon-gamma and regulates the expression of interferon-gamma stimulated gene 15 in MCF-7 cells.	Pubmed	12.22	1000	34.71	343.2	1	1	DDX58
	12165038	Association of the SULT1A1 R213H polymorphism with colorectal cancer.	Pubmed	12.22	1000	34.71	343.2	1	1	SULT1A1
	22498419	Association between gamma-glutamyltransferase and coronary artery calcification.	Pubmed	12.22	1000	34.71	343.2	1	1	GGT1
	28369997	Gene expression profile after knockdown of USP18 in Hepg2.2.15 cells.	Pubmed	12.22	1000	34.71	343.2	1	1	USP18
	23815603	Chemical suppression of an oncogenic splicing variant of AIMP2 induces tumour regression.	Pubmed	12.22	1000	34.71	343.2	1	1	AIMP2
	19284504	Eosinophil cationic protein stimulates migration of human lung fibroblasts in vitro.	Pubmed	12.22	1000	34.71	343.2	1	1	RNASE3
	21640172	Molecular evolution of the EGF-CFC protein family.	Pubmed	12.22	1000	34.71	343.2	1	1	CFC1
	31558697	Parkin facilitates proteasome inhibitor-induced apoptosis via suppression of NF-?B activity in hepatocellular carcinoma.	Pubmed	12.22	1000	34.71	343.2	1	1	PRKN
	33611076	Clinical manifestations of Parkinson's disease harboring VPS35 retromer complex component p.D620N with long-term follow-up.	Pubmed	12.22	1000	34.71	343.2	1	1	VPS35
	28168196	Preoperative Gamma-Glutamyltransferase Is Associated with Cancer-Specific Survival and Recurrence-Free Survival of Nonmetastatic Renal Cell Carcinoma with Venous Tumor Thrombus.	Pubmed	12.22	1000	34.71	343.2	1	1	GGT1
	15949571	Genetic polymorphism in the sulfotransferase SULT1A1 gene in cancer.	Pubmed	12.22	1000	34.71	343.2	1	1	SULT1A1
	31294486	AKR1C3 expression in primary lesion rebiopsy at the time of metastatic castration-resistant prostate cancer is strongly associated with poor efficacy of abiraterone as a first-line therapy.	Pubmed	12.22	1000	34.71	343.2	1	1	AKR1C3
	24831986	Mutation analysis of PARK2 in a Uyghur family with early-onset Parkinson's disease in Xinjiang, China.	Pubmed	12.22	1000	34.71	343.2	1	1	PRKN
	30472158	IKZF2 Drives Leukemia Stem Cell Self-Renewal and Inhibits Myeloid Differentiation.	Pubmed	12.22	1000	34.71	343.2	1	1	IKZF2
	33418496	The RNA methyltransferase NSUN6 suppresses pancreatic cancer development by regulating cell proliferation.	Pubmed	12.22	1000	34.71	343.2	1	1	NSUN6
	15252205	Nitrosative stress linked to sporadic Parkinson's disease: S-nitrosylation of parkin regulates its E3 ubiquitin ligase activity.	Pubmed	12.22	1000	34.71	343.2	1	1	PRKN
	21047781	Function of partially duplicated human ?77 nicotinic receptor subunit CHRFAM7A gene: potential implications for the cholinergic anti-inflammatory response.	Pubmed	12.22	1000	34.71	343.2	1	1	CHRNA7
	18037420	Serum gamma-glutamyltransferase level and peripheral arterial disease.	Pubmed	12.22	1000	34.71	343.2	1	1	GGT1
	24256307	Influence of uridine diphosphate-glucuronyltransferase 2B7 (UGT2B7) variants on postoperative buprenorphine analgesia.	Pubmed	12.22	1000	34.71	343.2	1	1	UGT2B7
	11976493	Three-dimensional structure of an immunoglobulin light-chain dimer with amyloidogenic properties.	Pubmed	12.22	1000	34.71	343.2	1	1	IGLL1
	17675527	Neutrophils as a novel source of eosinophil cationic protein in IgE-mediated processes.	Pubmed	12.22	1000	34.71	343.2	1	1	RNASE3
	29682760	Protective role of Parkin in skeletal muscle contractile and mitochondrial function.	Pubmed	12.22	1000	34.71	343.2	1	1	PRKN
	21996382	Mutations in the parkin gene are a minor cause of Parkinson's disease in the South African population.	Pubmed	12.22	1000	34.71	343.2	1	1	PRKN
	1706781	Reconstruction and analysis of human Alu genes.	Pubmed	12.22	1000	34.71	343.2	1	1	BCR
	33347683	Formation of retromer transport carriers is disrupted by the Parkinson disease-linked Vps35 D620N variant.	Pubmed	12.22	1000	34.71	343.2	1	1	VPS35
	18987353	A multidisciplinary study of patients with early-onset PD with and without parkin mutations.	Pubmed	12.22	1000	34.71	343.2	1	1	PRKN
	26733542	Copper metabolism domain-containing 1 represses the mediators involved in the terminal effector pathways of human labour and delivery.	Pubmed	12.22	1000	34.71	343.2	1	1	COMMD1
	21454689	Relationship between homo-oligomerization of a mammalian olfactory receptor and its activation state demonstrated by bioluminescence resonance energy transfer.	Pubmed	12.22	1000	34.71	343.2	1	1	OR1D2
	31800094	High RIG-I expression in ovarian cancer associates with an immune-escape signature and poor clinical outcome.	Pubmed	12.22	1000	34.71	343.2	1	1	DDX58
	19056334	Functional role of the charge at the T538 residue in the control of protein kinase Ctheta.	Pubmed	12.22	1000	34.71	343.2	1	1	PRKCQ
	26817873	Makorin Ring Finger Protein 1 as Adjunctive Marker in Liquid-based Cervical Cytology.	Pubmed	12.22	1000	34.71	343.2	1	1	MKRN1
	21411515	A role for the small GTPase Rab6 in assembly of human cytomegalovirus.	Pubmed	12.22	1000	34.71	343.2	1	1	RAB6A
	35032792	The role of junctional adhesion molecule-C in trophoblast differentiation and function during normal pregnancy and preeclampsia.	Pubmed	12.22	1000	34.71	343.2	1	1	JAM3
	16080486	Sulfotransferase1A1 and risk of postmenopausal breast cancer.	Pubmed	12.22	1000	34.71	343.2	1	1	SULT1A1
	16703408	Waxing and waning of a pituitary mass in a young woman with combined pituitary hormone deficiency (CPHD) due to a PROP-1 mutation.	Pubmed	12.22	1000	34.71	343.2	1	1	PROP1
	21512179	Association with serum gamma-glutamyltransferase levels and alcohol consumption on stroke and coronary artery disease: the Suita study.	Pubmed	12.22	1000	34.71	343.2	1	1	GGT1
	21111704	Reaction product affinity regulates activation of human sulfotransferase 1A1 PAP sulfation.	Pubmed	12.22	1000	34.71	343.2	1	1	SULT1A1
	19863651	Somatosensory function in asymptomatic Parkin-mutation carriers.	Pubmed	12.22	1000	34.71	343.2	1	1	PRKN
	26036629	Functional role of DNA mismatch repair gene PMS2 in prostate cancer cells.	Pubmed	12.22	1000	34.71	343.2	1	1	PMS2
	25359319	Expression and function of RIG-I in oral keratinocytes and fibroblasts.	Pubmed	12.22	1000	34.71	343.2	1	1	DDX58
	15090075	Parkin counteracts symptoms in a Drosophila model of Parkinson's disease.	Pubmed	12.22	1000	34.71	343.2	1	1	PRKN
	18248610	Parkin protects against tyrosinase-mediated dopamine neurotoxicity by suppressing stress-activated protein kinase pathways.	Pubmed	12.22	1000	34.71	343.2	1	1	PRKN
	16186501	Innate signals compensate for the absence of PKC-{theta} during in vivo CD8(+) T cell effector and memory responses.	Pubmed	12.22	1000	34.71	343.2	1	1	PRKCQ
	33396605	SARS-CoV-2 Nucleocapsid Protein Interacts with RIG-I and Represses RIG-Mediated IFN-? Production.	Pubmed	12.22	1000	34.71	343.2	1	1	DDX58
	19922606	Retinoic acid inducible gene I activates innate antiviral response against human parainfluenza virus type 3.	Pubmed	12.22	1000	34.71	343.2	1	1	DDX58
	12524255	The promoter polymorphism in the eosinophil cationic protein gene and its influence on the serum eosinophil cationic protein level.	Pubmed	12.22	1000	34.71	343.2	1	1	RNASE3
	15900227	Association of schizophrenia in African Americans to polymorphism in synapsin III gene.	Pubmed	12.22	1000	34.71	343.2	1	1	SYN3
	24998540	BCR/ABL mRNA targeting small interfering RNA effects on proliferation and apoptosis in chronic myeloid leukemia.	Pubmed	12.22	1000	34.71	343.2	1	1	BCR
	8266075	Isolation of ORC6, a component of the yeast origin recognition complex by a one-hybrid system.	Pubmed	12.22	1000	34.71	343.2	1	1	ORC6
	22342752	Spatial parkin translocation and degradation of damaged mitochondria via mitophagy in live cortical neurons.	Pubmed	12.22	1000	34.71	343.2	1	1	PRKN
	15557340	Parkin phosphorylation and modulation of its E3 ubiquitin ligase activity.	Pubmed	12.22	1000	34.71	343.2	1	1	PRKN
	15217944	Protein kinase C theta is highly expressed in gastrointestinal stromal tumors but not in other mesenchymal neoplasias.	Pubmed	12.22	1000	34.71	343.2	1	1	PRKCQ
	270322	The teeth of the "sleek" mouse.	Pubmed	12.22	1000	34.71	343.2	1	1	EDAR
	25941087	Sulfation of ritodrine by the human cytosolic sulfotransferases (SULTs): Effects of SULT1A3 genetic polymorphism.	Pubmed	12.22	1000	34.71	343.2	1	1	SULT1A3
	9560156	Mutations in the parkin gene cause autosomal recessive juvenile parkinsonism.	Pubmed	12.22	1000	34.71	343.2	1	1	PRKN
	33448283	Assessing the relationship between monoallelic PRKN mutations and Parkinson's risk.	Pubmed	12.22	1000	34.71	343.2	1	1	PRKN
	17698237	Hepatic fat content-independent association of the serum level of gamma-glutamyltransferase with visceral adiposity, but not subcutaneous adiposity.	Pubmed	12.22	1000	34.71	343.2	1	1	GGT1
	32780438	Targeting the ?7 nicotinic acetylcholine receptor-A novel road towards the future treatment of skin diseases.	Pubmed	12.22	1000	34.71	343.2	1	1	CHRNA7
	17885861	Changes in serum eosinophil cationic protein levels after exercise challenge in asthmatic children.	Pubmed	12.22	1000	34.71	343.2	1	1	RNASE3
	20550661	A novel COMMD1 mutation Thr174Met associated with elevated urinary copper and signs of enhanced apoptotic cell death in a Wilson Disease patient.	Pubmed	12.22	1000	34.71	343.2	1	1	COMMD1
	15455441	Rapid eye movement sleep behavior disorder in parkinsonism with parkin mutations.	Pubmed	12.22	1000	34.71	343.2	1	1	PRKN
	23955621	Sweet's syndrome complicated by Kikuchi's disease and hemophagocytic syndrome which presented with retinoic acid-inducible gene-I in both the skin epidermal basal layer and the cervical lymph nodes.	Pubmed	12.22	1000	34.71	343.2	1	1	DDX58
	25656612	Expression pattern of parkin isoforms in lung adenocarcinomas.	Pubmed	12.22	1000	34.71	343.2	1	1	PRKN
	23462328	Variation in the ?-glutamyltransferase 1 gene and risk of chronic pancreatitis.	Pubmed	12.22	1000	34.71	343.2	1	1	GGT1
	34561855	Helios is a marker, not a driver, of human Treg stability.	Pubmed	12.22	1000	34.71	343.2	1	1	IKZF2
	31002351	TRIM52 regulates the proliferation and invasiveness of lung cancer cells via the Wnt/??catenin pathway.	Pubmed	12.22	1000	34.71	343.2	1	1	TRIM52
	27177722	A homozygous parkin p.G284R mutation in a Chinese family with autosomal recessive juvenile parkinsonism.	Pubmed	12.22	1000	34.71	343.2	1	1	PRKN
	19734163	Genetic screening reveals high frequency of PARK2 mutations and reduced Parkin expression conferring risk for Parkinsonism in North West India.	Pubmed	12.22	1000	34.71	343.2	1	1	PRKN
	23060457	Retinoic acid inducible gene-I (RIG-I) signaling of hepatic stellate cells inhibits hepatitis C virus replication in hepatocytes.	Pubmed	12.22	1000	34.71	343.2	1	1	DDX58
	20698049	Germline mutation analysis of hPMS2 gene in Chinese families with hereditary nonpolyposis colorectal cancer.	Pubmed	12.22	1000	34.71	343.2	1	1	PMS2
	9192848	A novel tandem repeat sequence located on human chromosome 4p: isolation and characterization.	Pubmed	12.22	1000	34.71	343.2	1	1	USP17L9P
	27705802	Cytosolic Accumulation of L-Proline Disrupts GABA-Ergic Transmission through GAD Blockade.	Pubmed	12.22	1000	34.71	343.2	1	1	PRODH
	10946881	Combined pituitary hormone deficiency caused by a novel mutation of a highly conserved residue (F88S) in the homeodomain of PROP-1.	Pubmed	12.22	1000	34.71	343.2	1	1	PROP1
	22954895	Mouse models of Parkinson's disease associated with mitochondrial dysfunction.	Pubmed	12.22	1000	34.71	343.2	1	1	PRKN
	31933109	Understanding the role of key amino acids in regulation of proline dehydrogenase/proline oxidase (prodh/pox)-dependent apoptosis/autophagy as an approach to targeted cancer therapy.	Pubmed	12.22	1000	34.71	343.2	1	1	PRODH
	26463174	Monocytes/macrophages activation contributes to b-gamma-glutamyltransferase accumulation inside atherosclerotic plaques.	Pubmed	12.22	1000	34.71	343.2	1	1	GGT1
	33257649	(D620N) VPS35 causes the impairment of Wnt/?-catenin signaling cascade and mitochondrial dysfunction in a PARK17 knockin mouse model.	Pubmed	12.22	1000	34.71	343.2	1	1	VPS35
	22315051	Prognostic significance of gamma-glutamyltransferase in patients with endometrial cancer: a multi-centre trial.	Pubmed	12.22	1000	34.71	343.2	1	1	GGT1
	25269405	The expanding spectrum of human coronin 1A deficiency.	Pubmed	12.22	1000	34.71	343.2	1	1	CORO1A
	28796472	VPS35-Related Parkinson Disease	Pubmed	12.22	1000	34.71	343.2	1	1	VPS35
	25655306	Analysis of CHRNA7 rare variants in autism spectrum disorder susceptibility.	Pubmed	12.22	1000	34.71	343.2	1	1	CHRNA7
	21364651	Protein kinase C? is required for cardiomyocyte survival and cardiac remodeling.	Pubmed	12.22	1000	34.71	343.2	1	1	PRKCQ
	17017530	Molecular mechanisms of nigral neurodegeneration in Park2 and regulation of parkin protein by other proteins.	Pubmed	12.22	1000	34.71	343.2	1	1	PRKN
	14755441	Polymorphisms in the dopamine D5 receptor (DRD5) gene and ADHD.	Pubmed	12.22	1000	34.71	343.2	1	1	DRD5
	23047475	BCR-ABL1 kinase inhibits uracil DNA glycosylase UNG2 to enhance oxidative DNA damage and stimulate genomic instability.	Pubmed	12.22	1000	34.71	343.2	1	1	BCR
	26446607	Mismatches in the Influenza A Virus RNA Panhandle Prevent Retinoic Acid-Inducible Gene I (RIG-I) Sensing by Impairing RNA/RIG-I Complex Formation.	Pubmed	12.22	1000	34.71	343.2	1	1	DDX58
	22020100	55 Amino acid linker between helicase and carboxyl terminal domains of RIG-I functions as a critical repression domain and determines inter-domain conformation.	Pubmed	12.22	1000	34.71	343.2	1	1	DDX58
	29913187	Behavioral and neurochemical characterization of the mlh mutant mice lacking otoconia.	Pubmed	12.22	1000	34.71	343.2	1	1	OTOP1
	11739018	Characterization of human liver thermostable phenol sulfotransferase (SULT1A1) allozymes with 3,3',5-triiodothyronine as the substrate.	Pubmed	12.22	1000	34.71	343.2	1	1	SULT1A1
	19571039	Dual role of poly(ADP-ribose) glycohydrolase in the regulation of cell death in oxidatively stressed A549 cells.	Pubmed	12.22	1000	34.71	343.2	1	1	PARG
	23221386	Homing of human B cells to lymphoid organs and B-cell lymphoma engraftment are controlled by cell adhesion molecule JAM-C.	Pubmed	12.22	1000	34.71	343.2	1	1	JAM3
	16317586	Genotypic and allelic frequencies of SULT1A1 polymorphisms in women receiving adjuvant tamoxifen therapy.	Pubmed	12.22	1000	34.71	343.2	1	1	SULT1A1
	14582144	Comparison of polymorphisms in the alpha7 nicotinic receptor gene and its partial duplication in schizophrenic and control subjects.	Pubmed	12.22	1000	34.71	343.2	1	1	CHRNA7
	16469868	Bcr-Abl reduces endoplasmic reticulum releasable calcium levels by a Bcl-2-independent mechanism and inhibits calcium-dependent apoptotic signaling.	Pubmed	12.22	1000	34.71	343.2	1	1	BCR
	16227559	Mutational screening of the parkin gene among South Indians with early onset Parkinson's disease.	Pubmed	12.22	1000	34.71	343.2	1	1	PRKN
	15994945	Antibody against junctional adhesion molecule-C inhibits angiogenesis and tumor growth.	Pubmed	12.22	1000	34.71	343.2	1	1	JAM3
	15606901	Pathogenic mutations inactivate parkin by distinct mechanisms.	Pubmed	12.22	1000	34.71	343.2	1	1	PRKN
	26876165	Differential Regulation of Interferon Responses by Ebola and Marburg Virus VP35 Proteins.	Pubmed	12.22	1000	34.71	343.2	1	1	DDX58
	22927236	Lack of association between cancer history and PARKIN genotype: a family based study in PARKIN/Parkinson's families.	Pubmed	12.22	1000	34.71	343.2	1	1	PRKN
	20309583	Functional expression of alpha 7 nicotinic acetylcholine receptors in human periodontal ligament fibroblasts and rat periodontal tissues.	Pubmed	12.22	1000	34.71	343.2	1	1	CHRNA7
	24192137	Parkin depletion delays motor decline dose-dependently without overtly affecting neuropathology in ?-synuclein transgenic mice.	Pubmed	12.22	1000	34.71	343.2	1	1	PRKN
	1390336	Identification and characterization of the regulated pattern of expression of a novel mouse gene, meg1, during the meiotic cell cycle.	Pubmed	12.22	1000	34.71	343.2	1	1	MEIG1
	228748	Serum-free culture of Japanese quail kidney cells. Regulation of vitamin D metabolism.	Pubmed	12.22	1000	34.71	343.2	1	1	CRLF3
	25221423	Role of FAM18B in diabetic retinopathy.	Pubmed	12.22	1000	34.71	343.2	1	1	TVP23B
	14678753	The C289G and C418R missense mutations cause rapid sequestration of human Parkin into insoluble aggregates.	Pubmed	12.22	1000	34.71	343.2	1	1	PRKN
	2622338	Insertional inactivation of the downless gene in a family of transgenic mice.	Pubmed	12.22	1000	34.71	343.2	1	1	EDAR
	23258628	Germ cell-specific disruption of the Meig1 gene causes impaired spermiogenesis in mice.	Pubmed	12.22	1000	34.71	343.2	1	1	MEIG1
	27183587	Intracellular RIG-I Signaling Regulates TLR4-Independent Endothelial Inflammatory Responses to Endotoxin.	Pubmed	12.22	1000	34.71	343.2	1	1	DDX58
	16734611	PARK2/PACRG polymorphisms and susceptibility to typhoid and paratyphoid fever.	Pubmed	12.22	1000	34.71	343.2	1	1	PRKN
	26980484	Competing endogenous RNA networks of CYP4Z1 and pseudogene CYP4Z2P confer tamoxifen resistance in breast cancer.	Pubmed	12.22	1000	34.71	343.2	1	1	CYP4Z1
	26476480	Recurrent viral infections associated with a homozygous CORO1A mutation that disrupts oligomerization and cytoskeletal association.	Pubmed	12.22	1000	34.71	343.2	1	1	CORO1A
	22881371	Monounsaturated fatty acids are required for membrane translocation of protein kinase C-theta induced by lipid overload in skeletal muscle.	Pubmed	12.22	1000	34.71	343.2	1	1	PRKCQ
	7759490	Human gamma-glutamyl transpeptidase mutants involving conserved aspartate residues and the unique cysteine residue of the light subunit.	Pubmed	12.22	1000	34.71	343.2	1	1	GGT1
	21326359	WSTF does it all: a multifunctional protein in transcription, repair, and replication.	Pubmed	12.22	1000	34.71	343.2	1	1	BAZ1B
	24949556	Activation of ?7nAChR by nicotine reduced the Th17 response in CD4(+)T lymphocytes.	Pubmed	12.22	1000	34.71	343.2	1	1	CHRNA7
	11371507	Persistent Prop1 expression delays gonadotrope differentiation and enhances pituitary tumor susceptibility.	Pubmed	12.22	1000	34.71	343.2	1	1	PROP1
	15102676	Alterations of the tumor suppressor gene Parkin in non-small cell lung cancer.	Pubmed	12.22	1000	34.71	343.2	1	1	PRKN
	21461783	Different roles of the human Orc6 protein in the replication initiation process.	Pubmed	12.22	1000	34.71	343.2	1	1	ORC6
	22009746	Creating an ?7 nicotinic acetylcholine recognition domain from the acetylcholine-binding protein: crystallographic and ligand selectivity analyses.	Pubmed	12.22	1000	34.71	343.2	1	1	CHRNA7
	32477064	Lack of Helios During Neural Development Induces Adult Schizophrenia-Like Behaviors Associated With Aberrant Levels of the TRIF-Recruiter Protein WDFY1.	Pubmed	12.22	1000	34.71	343.2	1	1	IKZF2
	24891615	Chromatinized protein kinase C-? directly regulates inducible genes in epithelial to mesenchymal transition and breast cancer stem cells.	Pubmed	12.22	1000	34.71	343.2	1	1	PRKCQ
	16367892	Parkin gene variations in late-onset Parkinson's disease: comparison between Norwegian and German cohorts.	Pubmed	12.22	1000	34.71	343.2	1	1	PRKN
	21659521	Molecular mechanism of signal perception and integration by the innate immune sensor retinoic acid-inducible gene-I (RIG-I).	Pubmed	12.22	1000	34.71	343.2	1	1	DDX58
	33226440	Human RNase3 immune modulation by catalytic-dependent and independent modes in a macrophage-cell line infection model.	Pubmed	12.22	1000	34.71	343.2	1	1	RNASE3
	17253626	Extensive gene conversion at the PMS2 DNA mismatch repair locus.	Pubmed	12.22	1000	34.71	343.2	1	1	PMS2CL
	28235587	Otolith dysfunction alters exploratory movement in mice.	Pubmed	12.22	1000	34.71	343.2	1	1	OTOP1
	17053203	NS1 protein of influenza A virus inhibits the function of intracytoplasmic pathogen sensor, RIG-I.	Pubmed	12.22	1000	34.71	343.2	1	1	DDX58
	2869484	Molecular cloning and nucleotide sequence of rat kidney gamma-glutamyl transpeptidase cDNA.	Pubmed	12.22	1000	34.71	343.2	1	1	GGT1
	17097678	Solution structure of the COMMD1 N-terminal domain.	Pubmed	12.22	1000	34.71	343.2	1	1	COMMD1
	26600485	Eosinophil cationic protein mRNA expression in children with bronchial asthma.	Pubmed	12.22	1000	34.71	343.2	1	1	RNASE3
	30970261	Essential Gene Profiles for Human Pluripotent Stem Cells Identify Uncharacterized Genes and Substrate Dependencies.	Pubmed	12.22	1000	34.71	343.2	1	1	DRICH1
	28620148	CFC1 is a cancer stemness-regulating factor in neuroblastoma.	Pubmed	12.22	1000	34.71	343.2	1	1	CFC1
	18087674	The cytotoxicity of eosinophil cationic protein/ribonuclease 3 on eukaryotic cell lines takes place through its aggregation on the cell membrane.	Pubmed	12.22	1000	34.71	343.2	1	1	RNASE3
	15708988	Regulating intracellular antiviral defense and permissiveness to hepatitis C virus RNA replication through a cellular RNA helicase, RIG-I.	Pubmed	12.22	1000	34.71	343.2	1	1	DDX58
	3520144	Localization of human eosinophil granule major basic protein, eosinophil cationic protein, and eosinophil-derived neurotoxin by immunoelectron microscopy.	Pubmed	12.22	1000	34.71	343.2	1	1	RNASE3
	2568315	Human gamma-glutamyl transpeptidase cDNA: comparison of hepatoma and kidney mRNA in the human and rat.	Pubmed	12.22	1000	34.71	343.2	1	1	GGT1
	20581823	Structural and functional insights into 5'-ppp RNA pattern recognition by the innate immune receptor RIG-I.	Pubmed	12.22	1000	34.71	343.2	1	1	DDX58
	32525264	Structure-function studies of galectin-14, an important effector molecule in embryology.	Pubmed	12.22	1000	34.71	343.2	1	1	LGALS14
	5031477	Hyperprolinemia and prolinuria in a new inbred strain of mice, PRO-Re.	Pubmed	12.22	1000	34.71	343.2	1	1	PRODH
	20064528	RAB6C is a retrogene that encodes a centrosomal protein involved in cell cycle progression.	Pubmed	12.22	1000	34.71	343.2	1	1	RAB6C
	29020610	Neonatal C57BL/6J and parkin mice respond differently following developmental manganese exposure: Result of a high dose pilot study.	Pubmed	12.22	1000	34.71	343.2	1	1	PRKN
	33128014	Single-cell analysis of AIMP2 splice variants informs on drug sensitivity and prognosis in hematologic cancer.	Pubmed	12.22	1000	34.71	343.2	1	1	AIMP2
	22577899	Recurrent and founder mutations in the PMS2 gene.	Pubmed	12.22	1000	34.71	343.2	1	1	PMS2
	19187332	Alpha-T-catenin (CTNNA3) gene was identified as a risk variant for toluene diisocyanate-induced asthma by genome-wide association analysis.	Pubmed	12.22	1000	34.71	343.2	1	1	CTNNA3
	23437303	Rab6a/a' are important Golgi regulators of pro-inflammatory TNF secretion in macrophages.	Pubmed	12.22	1000	34.71	343.2	1	1	RAB6A
	32156628	Parkin mutation decreases neurite complexity and maturation in neurons derived from human fibroblasts.	Pubmed	12.22	1000	34.71	343.2	1	1	PRKN
	25740518	Coronin-1 and calcium signaling governs sympathetic final target innervation.	Pubmed	12.22	1000	34.71	343.2	1	1	CORO1A
	17501952	A novel deletion mutation in the EDAR gene in a Pakistani family with autosomal recessive hypohidrotic ectodermal dysplasia.	Pubmed	12.22	1000	34.71	343.2	1	1	EDAR
	17168522	An ent-kaurene that inhibits mitotic chromosome movement and binds the kinetochore protein ran-binding protein 2.	Pubmed	12.22	1000	34.71	343.2	1	1	RANBP2
	16936091	Serial analysis of gene expression (SAGE) in the rat limbal and central corneal epithelium.	Pubmed	12.22	1000	34.71	343.2	1	1	WFDC21P
	19162045	The aldo-keto reductase AKR1C3 contributes to 7,12-dimethylbenz(a)anthracene-3,4-dihydrodiol mediated oxidative DNA damage in myeloid cells: implications for leukemogenesis.	Pubmed	12.22	1000	34.71	343.2	1	1	AKR1C3
	19904771	The loss of phenol sulfotransferase 1 in hepatocellular carcinogenesis.	Pubmed	12.22	1000	34.71	343.2	1	1	SULT1A1
	18715564	Serum gamma-glutamyltransferase is not associated to peripheral arterial disease in type 2 diabetic patients: Cross-sectional findings.	Pubmed	12.22	1000	34.71	343.2	1	1	GGT1
	25168732	Mitogen-activated protein kinase signaling pathways are involved in regulating ?7 nicotinic acetylcholine receptor-mediated amyloid-? uptake in SH-SY5Y cells.	Pubmed	12.22	1000	34.71	343.2	1	1	CHRNA7
	27413149	Compartmentalized Regulation of Parkin-Mediated Mitochondrial Quality Control in the Drosophila Nervous System In Vivo.	Pubmed	12.22	1000	34.71	343.2	1	1	PRKN
	15263025	Protein kinase C theta is critical for the development of in vivo T helper (Th)2 cell but not Th1 cell responses.	Pubmed	12.22	1000	34.71	343.2	1	1	PRKCQ
	30088666	Targeting junctional adhesion molecule-C ameliorates sepsis-induced acute lung injury by decreasing CXCR4	Pubmed	12.22	1000	34.71	343.2	1	1	JAM3
	22377733	Exon dosage variations in Brazilian patients with Parkinson's disease: analysis of SNCA, PARKIN, PINK1 and DJ-1 genes.	Pubmed	12.22	1000	34.71	343.2	1	1	PRKN
	23804634	Measles virus nonstructural C protein modulates viral RNA polymerase activity by interacting with host protein SHCBP1.	Pubmed	12.22	1000	34.71	343.2	1	1	SHCBP1
	12153174	Expression of a unique helios isoform in human leukemia cells.	Pubmed	12.22	1000	34.71	343.2	1	1	IKZF2
	25913781	Gamma-glutamyl transferase is associated with sarcopenia and sarcopenic obesity in community-dwelling older adults: results from the Fifth Korea National Health and Nutrition Examination Survey, 2010-2011.	Pubmed	12.22	1000	34.71	343.2	1	1	GGT1
	19109420	Supervillin reorganizes the actin cytoskeleton and increases invadopodial efficiency.	Pubmed	12.22	1000	34.71	343.2	1	1	SVIL
	19464273	Effects of partial suppression of parkin on huntingtin mutant R6/1 mice.	Pubmed	12.22	1000	34.71	343.2	1	1	PRKN
	7829089	Thermolabile phenol sulfotransferase gene (STM): localization to human chromosome 16p11.2.	Pubmed	12.22	1000	34.71	343.2	1	1	SULT1A3
	28867356	Relationship of SULT1A1 copy number variation with estrogen metabolism and human health.	Pubmed	12.22	1000	34.71	343.2	1	1	SULT1A1
	20718756	ABCC11/MRP8 confers pemetrexed resistance in lung cancer.	Pubmed	12.22	1000	34.71	343.2	1	1	ABCC11
	24667537	Coronin 1 regulates cognition and behavior through modulation of cAMP/protein kinase A signaling.	Pubmed	12.22	1000	34.71	343.2	1	1	CORO1A
	32198633	Body mass index and ?-glutamyl transferase expression in normal and cancerous breast tissue.	Pubmed	12.22	1000	34.71	343.2	1	1	GGT1
	32117232	NS5 Conservative Site Is Required for Zika Virus to Restrict the RIG-I Signaling.	Pubmed	12.22	1000	34.71	343.2	1	1	DDX58
	10622721	cDNA cloning, expression and characterization of human prostaglandin F synthase.	Pubmed	12.22	1000	34.71	343.2	1	1	AKR1C3
	20524212	Type I hyperprolinemia: genotype/phenotype correlations.	Pubmed	12.22	1000	34.71	343.2	1	1	PRODH
	24690289	The contribution of visceral fat to improved insulin signaling in Ames dwarf mice.	Pubmed	12.22	1000	34.71	343.2	1	1	PROP1
	27939920	Gamma-glutamyl transferase and atrial fibrillation in patients with coronary artery disease.	Pubmed	12.22	1000	34.71	343.2	1	1	GGT1
	24412064	RIG-I modulates Src-mediated AKT activation to restrain leukemic stemness.	Pubmed	12.22	1000	34.71	343.2	1	1	DDX58
	19234169	Chemotaxis and phagocytosis in neutrophils is independent of coronin 1.	Pubmed	12.22	1000	34.71	343.2	1	1	CORO1A
	20716116	Role of guanylate binding protein-1 in vascular defects associated with chronic inflammatory diseases.	Pubmed	12.22	1000	34.71	343.2	1	1	GBP1
	27487209	Emergence of a Homo sapiens-specific gene family and chromosome 16p11.2 CNV susceptibility.	Pubmed	12.22	1000	34.71	343.2	1	1	BOLA2
	17786049	COMMD1: a novel protein involved in the proteolysis of proteins.	Pubmed	12.22	1000	34.71	343.2	1	1	COMMD1
	26414209	Association between serum gamma-glutamyltransferase and the progression of coronary artery calcification.	Pubmed	12.22	1000	34.71	343.2	1	1	GGT1
	9792917	Identification of a principal mRNA species for human 3alpha-hydroxysteroid dehydrogenase isoform (AKR1C3) that exhibits high prostaglandin D2 11-ketoreductase activity.	Pubmed	12.22	1000	34.71	343.2	1	1	AKR1C3
	8519693	Inhibition of gamma-glutamyl transpeptidase activity at the surface of human myeloid cells is correlated with macrophage maturation and transforming growth factor beta production.	Pubmed	12.22	1000	34.71	343.2	1	1	GGT1
	21562121	Characterization of the interaction between the influenza A virus polymerase subunit PB1 and the host nuclear import factor Ran-binding protein 5.	Pubmed	12.22	1000	34.71	343.2	1	1	IPO5
	32234761	Structure and allosteric activity of a single-disulfide conopeptide from	Pubmed	12.22	1000	34.71	343.2	1	1	CHRNA7
[truncated: 4,827 more rows]

[truncated: 3 more sheets: Supplemental_Table_S11, Supplemental_Table_S12, Supplemental_Table_S13]
